# Supplementary material
Source: MDPI journal article supplement (https://www.mdpi.com/2073-4352/13/4/569)
Supplement: s1 [file s1]

# Supramolecular Structure of Tris(1,10-phenanthroline)zinc(II)-Cation and N,N0,N00-tris(carboxymethyl)-1,3,5-benzenetricarboxamide-Anion: Synthesis, Crystal Structure, Vibrational Spectra, and Theoretical Investigations

Niels-Patrick Pook

Institute of Inorganic and Analytical Chemistry, Clausthal University of Technology, Paul-Ernst-Str. 4, D-38678 Clausthal-Zellerfeld, Germany; niels-patrick.pook@tu-clausthal.de; Tel.: +49-5323-72-2887

**Table S1.** Selected bond lengths (Å) and bond angle (°) of the cationic complex.

| Bond     | Lengths     | Bond     | Lengths     |
|----------|-------------|----------|-------------|
| Zn–N4    | 2.166 (4)   | Zn–N7    | 2.163 (4)   |
| Zn–N5    | 2.152 (4)   | Zn–N8    | 2.183 (3)   |
| Zn–N6    | 2.155 (3)   | Zn–N9    | 2.180 (4)   |
| Bond     | Angle       | Bond     | Angle       |
| N4–Zn–N5 | 77.50 (14)  | N6–Zn–N5 | 98.94 (14)  |
| N4–Zn–N6 | 101.77 (14) | N6–Zn–N7 | 77.32 (14)  |
| N4–Zn–N7 | 94.87 (13)  | N6–Zn–N8 | 166.80 (13) |
| N4–Zn–N8 | 90.05 (13)  | N6–Zn–N9 | 92.02 (14)  |
| N4–Zn–N9 | 165.01 (14) | N7–Zn–N8 | 96.00 (13)  |
| N5–Zn–N7 | 170.76 (14) | N7–Zn–N9 | 93.87 (13)  |
| N5–Zn–N8 | 89.28 (13)  | N8–Zn–N9 | 76.93 (13)  |
| N5–Zn–N9 | 94.71 (14)  |          |             |

**Table S2.** Selected bond lengths (Å) and bond angle (°) of the dianion.

| Bond    | Lengths   | Bond   | Lengths   |
|---------|-----------|--------|-----------|
| C1–C2   | 1.390 (6) | O3–C9  | 1.249 (5) |
| C1–C6   | 1.393 (6) | O4–C10 | 1.244 (5) |
| C1–C7   | 1.495 (6) | O5–C12 | 1.247 (6) |
| C2–C3   | 1.404 (6) | O6–C12 | 1.237 (6) |
| C3–C4   | 1.397 (6) | O7–C13 | 1.234 (5) |
| C3–C10  | 1.479 (6) | O8–C15 | 1.217 (6) |
| C4–C5   | 1.392 (6) | O9–C15 | 1.312 (6) |
| C5–C6   | 1.398 (6) | O9–H9  | 1.26 (10) |
| C5–C13  | 1.496 (6) | N1–C7  | 1.340 (6) |
| C8–C9   | 1.519 (6) | N1–C8  | 1.456 (5) |
| C11–C12 | 1.502 (6) | N2–C10 | 1.344 (5) |
| C14–C15 | 1.506 (6) | N2–C11 | 1.456 (5) |
| O1–C7   | 1.241 (5) | N3–C13 | 1.343 (5) |
| O2–C9   | 1.267 (5) | N3–C14 | 1.455 (5) |
| Bond    | Angle     | Bond   | Angle     |

|           |           |            |           |
|-----------|-----------|------------|-----------|
| C2–C1–C6  | 119.6 (4) | O3–C9–C8   | 119.8 (4) |
| C2–C1–C7  | 122.0 (4) | O2–C9–C8   | 114.5 (4) |
| C6–C1–C7  | 118.4 (4) | O4–C10–N2  | 121.3 (4) |
| C1–C2–C3  | 121.3 (4) | O4–C10–C3  | 120.2 (4) |
| C4–C3–C2  | 118.2 (4) | N2–C10–C3  | 118.4 (4) |
| C4–C3–C10 | 124.2 (4) | N2–C11–C12 | 115.2 (4) |
| C2–C3–C10 | 117.5 (4) | O5–C12–O6  | 124.6 (5) |
| C3–C4–C5  | 120.9 (4) | O5–C12–C11 | 116.6 (4) |
| C6–C5–C4  | 119.9 (4) | O6–C12–C11 | 118.9 (4) |
| C6–C5–C13 | 120.5 (4) | O7–C13–N3  | 123.9 (4) |
| C4–C5–C13 | 119.6 (4) | O7–C13–C5  | 121.1 (4) |
| C5–C6–C1  | 119.9 (4) | N3–C13–C5  | 115.1 (4) |
| O1–C7–N1  | 123.3 (4) | N3–C14–C15 | 113.3 (4) |
| O1–C7–C1  | 119.7 (4) | O8–C15–O9  | 121.0 (5) |
| N1–C7–C1  | 117.0 (4) | O8–C15–C14 | 119.9 (4) |
| N1–C8–C9  | 114.9 (4) | O9–C15–C14 | 119.0 (4) |
| O3–C9–O2  | 125.6 (4) |            |           |

**Tabel S3.** Hydrogen-bond geometry (Å, °) for [Zn(C<sub>12</sub>H<sub>8</sub>N<sub>2</sub>)<sub>3</sub>]C<sub>15</sub>H<sub>13</sub>N<sub>3</sub>O<sub>9</sub>·5H<sub>2</sub>O.

| <i>D</i> —H··· <i>A</i>                | <i>D</i> —H | H··· <i>A</i> | <i>D</i> ··· <i>A</i> | <i>D</i> —H··· <i>A</i> |
|----------------------------------------|-------------|---------------|-----------------------|-------------------------|
| O10—H10 <i>A</i> ···O4                 | 0.84 (3)    | 1.95 (3)      | 2.759 (5)             | 163 (6)                 |
| O10—H10 <i>B</i> ···O1 <sup>i</sup>    | 0.75 (6)    | 2.01 (6)      | 2.760 (5)             | 175 (7)                 |
| O11—H11 <i>A</i> ···O14                | 0.85 (7)    | 1.96 (7)      | 2.786 (6)             | 163 (7)                 |
| O11—H11 <i>B</i> ···O2 <sup>i</sup>    | 0.94 (7)    | 1.93 (7)      | 2.862 (5)             | 169 (6)                 |
| O12—H12 <i>A</i> ···O11 <sup>ii</sup>  | 0.98 (7)    | 1.86 (7)      | 2.831 (6)             | 166 (6)                 |
| O12—H12 <i>B</i> ···O13 <sup>iii</sup> | 0.82 (7)    | 2.04 (7)      | 2.840 (6)             | 162 (7)                 |
| O13—H13 <i>A</i> ···O6 <sup>iv</sup>   | 0.87 (3)    | 2.55 (4)      | 3.394 (6)             | 163 (6)                 |
| O13—H13 <i>B</i> ···O2 <sup>i</sup>    | 0.99 (7)    | 1.78 (7)      | 2.773 (5)             | 176 (6)                 |
| O13—H13 <i>B</i> ···O3 <sup>i</sup>    | 0.99 (7)    | 2.56 (7)      | 3.202 (5)             | 122 (5)                 |
| O14—H14 <i>C</i> ···O10                | 0.89 (3)    | 1.86 (3)      | 2.734 (5)             | 167 (6)                 |
| O14—H14 <i>D</i> ···O8 <sup>v</sup>    | 0.86 (3)    | 2.00 (4)      | 2.769 (5)             | 148 (6)                 |
| N1—H1···O7 <sup>v</sup>                | 0.87        | 2.23          | 3.010 (5)             | 150                     |
| N2—H2···O3 <sup>v</sup>                | 0.87        | 2.07          | 2.873 (5)             | 153                     |
| N3—H3···O5 <sup>vi</sup>               | 0.87        | 1.93          | 2.753 (5)             | 158                     |
| O9—H9···O6 <sup>vi</sup>               | 1.22 (6)    | 1.35 (6)      | 2.544 (5)             | 165 (5)                 |
| C17—H17···O3 <sup>i</sup>              | 0.94        | 2.55          | 3.404 (6)             | 152                     |
| C29—H29···O3 <sup>vii</sup>            | 0.94        | 2.46          | 3.183 (6)             | 134                     |
| C29—H29···O6 <sup>viii</sup>           | 0.94        | 2.64          | 3.346 (7)             | 132                     |
| C37—H37···O11                          | 0.94        | 2.49          | 3.144 (6)             | 127                     |
| C40—H40···O10                          | 0.94        | 2.55          | 3.253 (6)             | 132                     |
| C40—H40···N4                           | 0.94        | 2.67          | 3.221 (6)             | 118                     |

Symmetry codes: (i)  $-x+1/2, y-1/2, z$ ; (ii)  $-x+1, y+1/2, -z+1/2$ ; (iii)  $-x+3/2, y+1/2, z$ ; (iv)  $x+1/2, -y+1/2, -z+1$ ; (v)  $-x, -y+1, -z+1$ ; (vi)  $-x+1/2, y+1/2, z$ ; (vii)  $x+1, y, z$ ; (viii)  $-x+1, -y+1, -z+1$ .

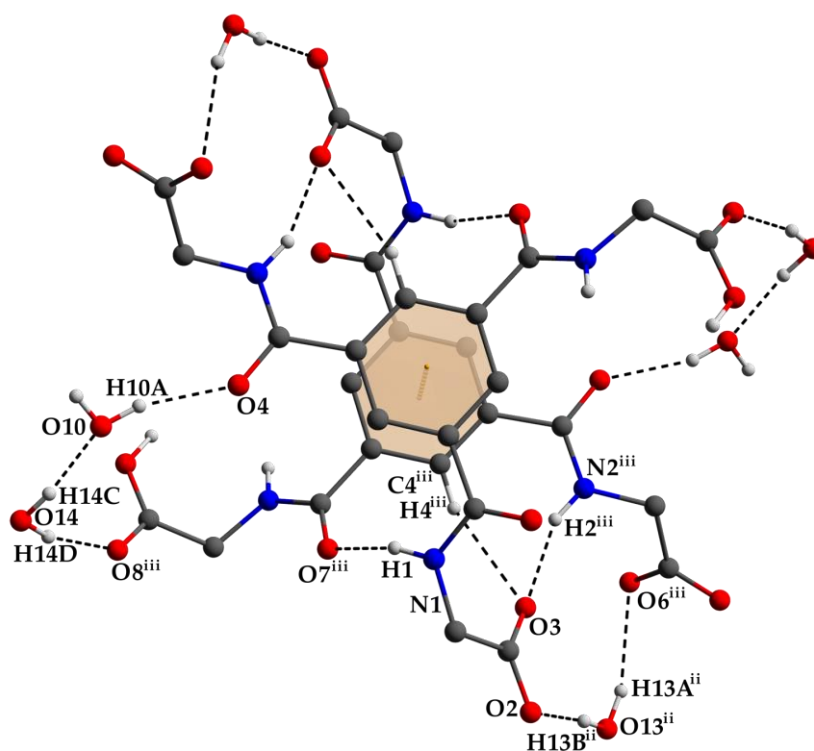

**Figure S1.** View of the dimeric anions with hydrogen bonds (black dashed lines) and  $\pi$ - $\pi$ -interaction (yellow dashed lines). The carbon-hydrogen atoms have been omitted for clarity. Symmetry codes: (ii)  $-x+1/2, y+1/2, z$ ; (iii)  $-x, -y+1, -z+1$ .

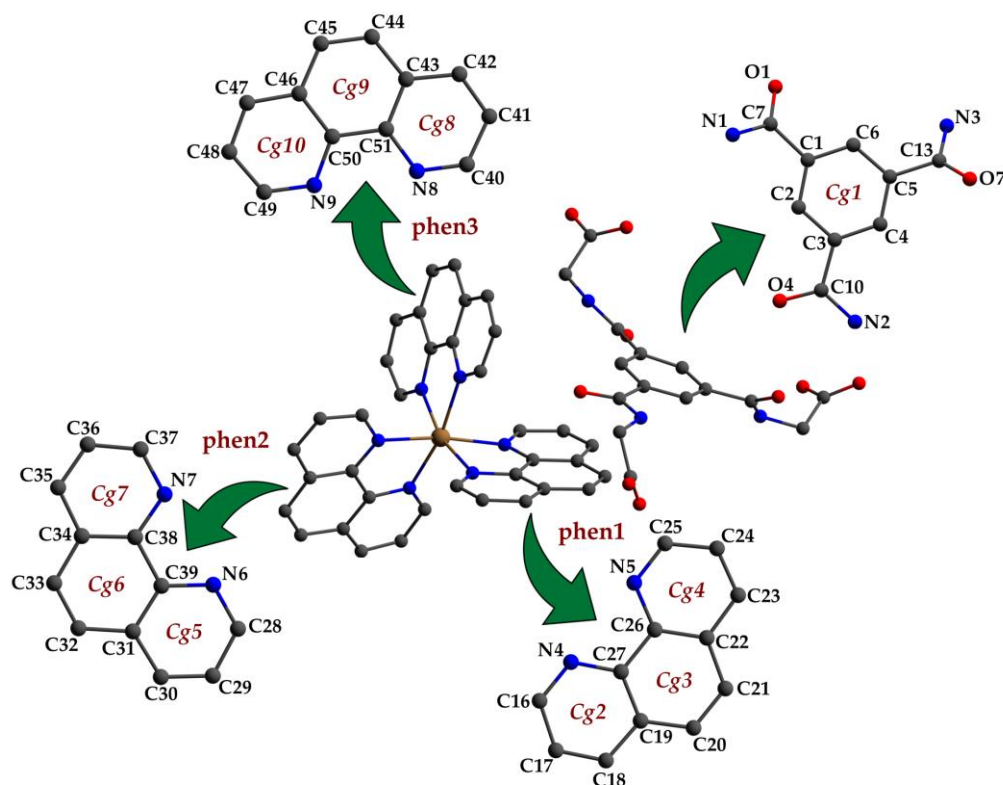

**Figure S2.** Definition of centroids of the phenanthrolines of the cationic complex and the dianion with numbering, respectively. The hydrogen atoms have been omitted for clarity.

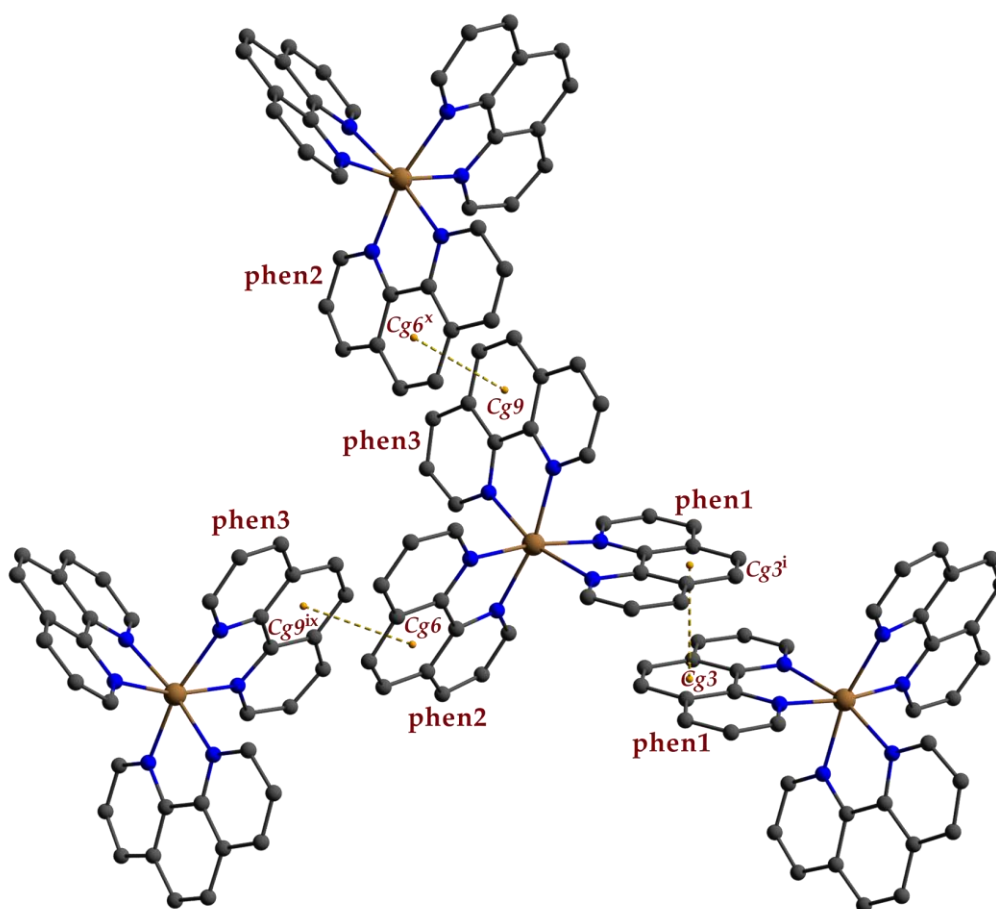

**Figure S3.** View of the three-dimensional cationic  $\pi$ - $\pi$ -interactions (yellow dashed lines). The hydrogen atoms have been omitted for clarity. Symmetry codes: (i)  $-x+1, -y+1, -z+1$ ; (ix)  $x+1/2, y, -z+1/2$ ; (x)  $x-1/2, y, -z+1/2$ .

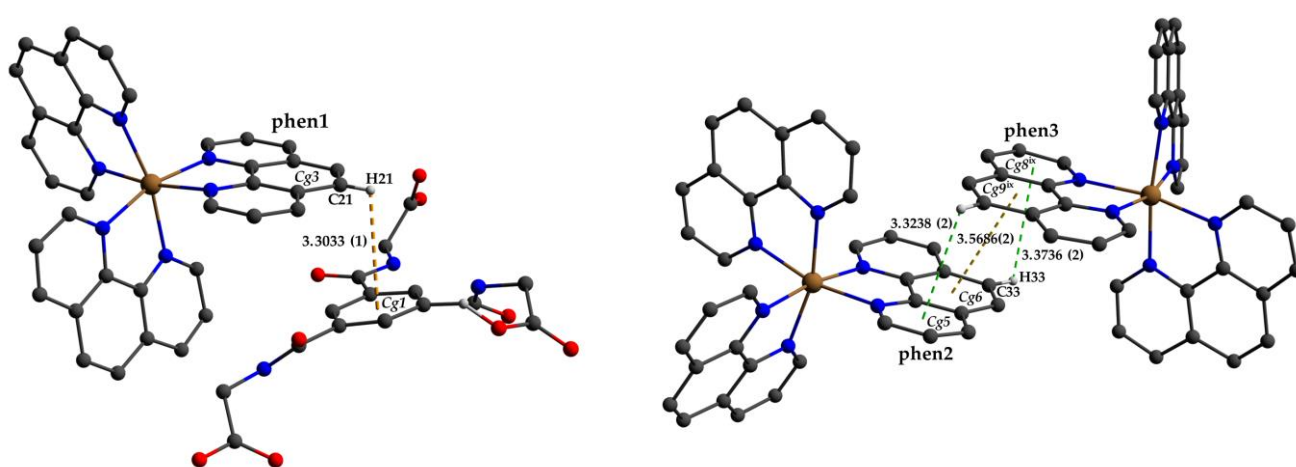

**Figure S4.** Representation of the C-H... $\pi$  interaction of the phenanthroline 1 and the dianion (left) as well as the  $\pi$ -stacking and C-H... $\pi$  interactions of the phenanthroline 2 and 3 (right). The hydrogen atoms have been omitted for clarity. Bond lengths are given in Å. Symmetry code: (ix)  $x+1/2, y, -z+1/2$ .

**Tabel S4.** Pairwise interaction energies (kJ/mol) calculated with PSI4 (SAPT0).

| Pairs                  | Basis set   |             |
|------------------------|-------------|-------------|
|                        | jun-cc-pVDZ | aug-cc-pVDZ |
| <b>dimeric anions</b>  |             |             |
| Electrostatics         | 401.44      | 407.80      |
| Exchange               | 124.47      | 124.79      |
| Induction              | -83.61      | -87.06      |
| Dispersion             | -108.72     | -128.12     |
| Total SAPT0            | 333.58      | 317.41      |
| <b>phen1 – phen1</b>   |             |             |
| Electrostatics         | -24.46      | -24.06      |
| Exchange               | 49.23       | 49.50       |
| Induction              | -5.75       | -5.88       |
| Dispersion             | -72.425     | -82.70      |
| Total SAPT0            | -53.40      | -63.13      |
| <b>phen2 – phen3</b>   |             |             |
| Electrostatics         | -29.17      | -29.01      |
| Exchange               | 55.77       | 56.12       |
| Induction              | -6.59       | -6.80       |
| Dispersion             | -67.73      | -77.49      |
| Total SAPT0            | -47.72      | -57.17      |
| <b>phen1 – dianion</b> |             |             |
| Electrostatics         | -37.09      | -36.52      |
| Exchange               | 39.64       | 39.67       |
| Induction              | -16.28      | -16.92      |
| Dispersion             | -53.70      | -62.91      |
| Total SAPT0            | -67.43      | -76.69      |
| <b>phen3 – dianion</b> |             |             |
| Electrostatics         | -13.08      | -12.53      |
| Exchange               | 15.47       | 15.48       |
| Induction              | -8.28       | -8.70       |
| Dispersion             | -24.00      | -28.25      |
| Total SAPT0            | -29.89      | -33.99      |

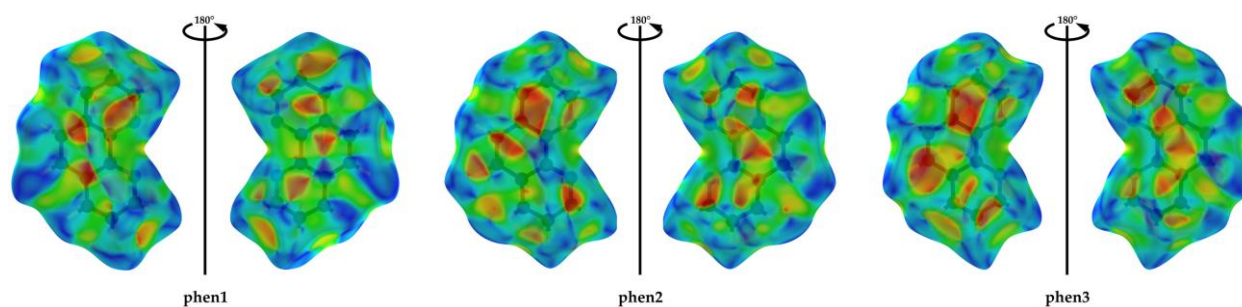

**Figure S5.** Graphical representations of the Hirshfeld surfaces of the phenanthroline ligands of the cationic complex drawn with transparency and mapped over the shape index.

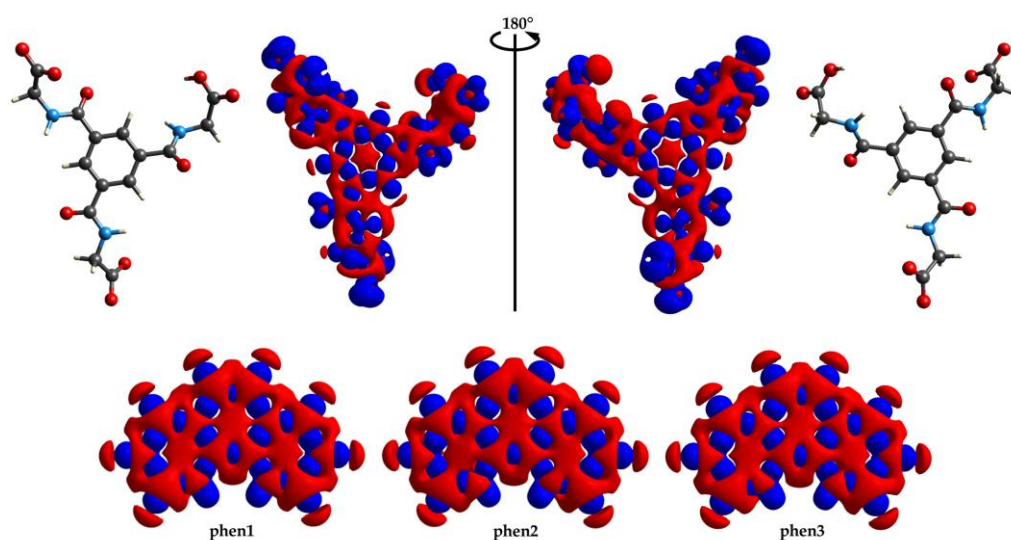

**Figure S6.** Graphical representations of the Hirshfeld surfaces of the dianion (upper part) and the phenanthroline ligands of the cationic complex (lower part) mapped over the deformation density.

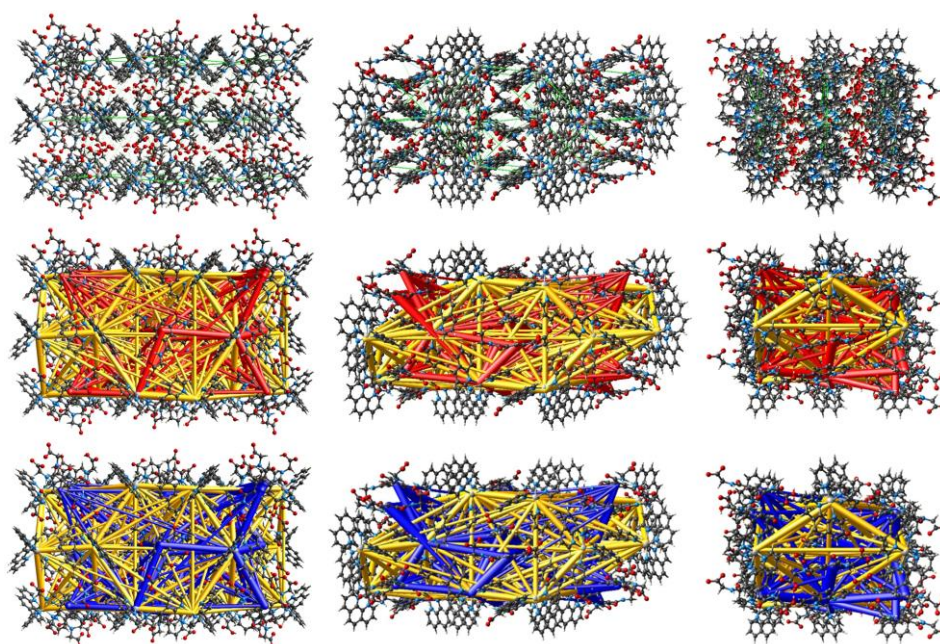

**Figure S7.** Visualization of the energy framework in the crystal along the *a* axis (left), *b* axis (middle), and *c* axis (right) of the dispersion energy (top), the coulomb energy (middle), and the total energy (bottom).



**Table S5.** Pairwise interaction energies of the cationic complexes and anions with color code. Interaction Energy is given in kJ/mol and R is the distance between molecular centroids (mean atomic position) in Å.

### Anions

| N | Symop            | R     | Electron Density | E <sub>ele</sub> | E <sub>pol</sub> | E <sub>dis</sub> | E <sub>rep</sub> | E <sub>tot</sub> |
|---|------------------|-------|------------------|------------------|------------------|------------------|------------------|------------------|
| 1 | -x, -y, -z       | 3.47  | B3LYP/6-31G(d,p) | 644.29           | -100.70          | -83.41           | 124.41           | 610.91           |
| 1 | -x, -y, -z       | 3.47  | B3LYP/DGDZVP     | 606.40           | -101.10          | -83.41           | 158.62           | 591.69           |
| 1 | -x, -y, -z       | 3.47  | HF/3-21G         | 627.37           | -115.35          | -83.41           | 89.08            | 561.26           |
| 2 | -x+1/2, y+1/2, z | 10.91 | B3LYP/6-31G(d,p) | 290.15           | -125.16          | -20.84           | 156.94           | 292.95           |
| 2 | -x+1/2, y+1/2, z | 10.91 | B3LYP/DGDZVP     | 268.82           | -123.22          | -20.84           | 187.67           | 290.83           |
| 2 | -x+1/2, y+1/2, z | 10.91 | HF/3-21G         | 265.86           | -149.09          | -20.84           | 119.03           | 251.63           |

### Cationic complexes

| N | Symop            | R     | Electron Density | E <sub>ele</sub> | E <sub>pol</sub> | E <sub>dis</sub> | E <sub>rep</sub> | E <sub>tot</sub> |
|---|------------------|-------|------------------|------------------|------------------|------------------|------------------|------------------|
| 2 | x+1/2, y, -z+1/2 | 10.02 | B3LYP/6-31G(d,p) | 541.58           | -59.19           | -74.24           | 46.82            | 493.09           |
| 2 | x+1/2, y, -z+1/2 | 10.02 | B3LYP/DGDZVP     | 525.27           | -58.36           | -74.24           | 71.84            | 491.91           |
| 2 | x+1/2, y, -z+1/2 | 10.02 | HF/3-21G         | 537.49           | -55.41           | -74.24           | 38.27            | 475.73           |
| 1 | -x, -y, -z       | 9.40  | B3LYP/6-31G(d,p) | 551.28           | -61.32           | -77.71           | 41.31            | 495.35           |
| 1 | -x, -y, -z       | 9.40  | B3LYP/DGDZVP     | 537.27           | -60.48           | -77.71           | 63.49            | 494.86           |
| 1 | -x, -y, -z       | 9.40  | HF/3-21G         | 544.00           | -55.86           | -77.71           | 34.10            | 475.56           |

### Cation – Anion

| N | Symop | R    | Electron Density | E <sub>ele</sub> | E <sub>pol</sub> | E <sub>dis</sub> | E <sub>rep</sub> | E <sub>tot</sub> |
|---|-------|------|------------------|------------------|------------------|------------------|------------------|------------------|
| 1 | -     | 7.43 | B3LYP/6-31G(d,p) | -649.16          | -64.74           | -68.88           | 38.50            | -770.45          |
| 1 | -     | 7.43 | B3LYP/DGDZVP     | -659.32          | -63.50           | -68.88           | 58.60            | -767.86          |
| 1 | -     | 7.43 | HF/3-21G         | -639.86          | -59.80           | -68.88           | 30.34            | -728.32          |

Scale factors for benchmarked energy models [1]

| Energy Model                                     | k <sub>ele</sub> | k <sub>pol</sub> | k <sub>disp</sub> | k <sub>rep</sub> |
|--------------------------------------------------|------------------|------------------|-------------------|------------------|
| CE-HF ... HF/3-21G electron densities            | 1.019            | 0.651            | 0.901             | 0.811            |
| CE-B3LYP ... B3LYP/6-31G(d,p) electron densities | 1.057            | 0.740            | 0.871             | 0.618            |

Total energies, only reported for two benchmarked energy models, are the sum of the four energy components, scaled appropriately (see [59]).
