# Supplementary material
Source: MDPI journal article supplement (https://www.mdpi.com/2073-4352/13/4/569)
Supplement: s1 [file s1]

Archive with 13 entries (13 files):
- C51H47N9O14Zn.cif
- C51H47N9O14Zn.fcf
- C51H47N9O14Zn_Platon_out.chk
- checkcif.pdf
- crystals-2297390-supplementary-XML.pdf
- Figure S1.tiff
- Figure S2.tiff
- Figure S3.tiff
- Figure S4.tiff
- Figure S5.tiff
- Figure S6.tiff
- Figure S7.tiff
- Video S1 Molecular connection of the dianions.mp4
