# Supplementary material
Source: MDPI journal article supplement (https://www.mdpi.com/2073-4352/13/4/569)
Supplement: s1 [file s1 › C51H47N9O14Zn.cif]

data_C51H47N9O14Zn
_vrf_PLAT355_C51H47N9O14Zn
;
PROBLEM: Long O-H (X0.82,N0.98A) O9 - H9 . 1.21 Ang.
RESPONSE:
The carboxylate group participates in a very strong hydrogen
bond which is discussed in detail in the paper.
;
_audit_creation_method            'SHELXL-2018/3'
_shelx_SHELXL_version_number      '2018/3'
_chemical_name_systematic         ?
_chemical_name_common             ?
_chemical_melting_point           ?
_chemical_formula_moiety          'C36 H24 N6 Zn, C15 H13 N3 O9, 5(H2 O)'
_chemical_formula_sum
 'C51 H47 N9 O14 Zn' 
_chemical_formula_weight          1075.34

loop_
 _atom_type_symbol
 _atom_type_description
 _atom_type_scat_dispersion_real
 _atom_type_scat_dispersion_imag
 _atom_type_scat_source
 'Zn'  'Zn'   0.2839   1.4301
 'International Tables Vol C Tables 4.2.6.8 and 6.1.1.4'
 'O'  'O'   0.0106   0.0060
 'International Tables Vol C Tables 4.2.6.8 and 6.1.1.4'
 'N'  'N'   0.0061   0.0033
 'International Tables Vol C Tables 4.2.6.8 and 6.1.1.4'
 'C'  'C'   0.0033   0.0016
 'International Tables Vol C Tables 4.2.6.8 and 6.1.1.4'
 'H'  'H'   0.0000   0.0000
 'International Tables Vol C Tables 4.2.6.8 and 6.1.1.4'
 
_space_group_crystal_system       orthorhombic
_space_group_IT_number            61
_space_group_name_H-M_alt         'P b c a'
_space_group_name_Hall            '-P 2ac 2ab'
 
_shelx_space_group_comment
;
The symmetry employed for this shelxl refinement is uniquely defined
by the following loop, which should always be used as a source of
symmetry information in preference to the above space-group names.
They are only intended as comments.
;
 
loop_
 _space_group_symop_operation_xyz
 'x, y, z'
 '-x+1/2, -y, z+1/2'
 '-x, y+1/2, -z+1/2'
 'x+1/2, -y+1/2, -z'
 '-x, -y, -z'
 'x-1/2, y, -z-1/2'
 'x, -y-1/2, z-1/2'
 '-x-1/2, y-1/2, z'
 
_cell_length_a                    14.6426(7)
_cell_length_b                    20.0946(13)
_cell_length_c                    32.345(2)
_cell_angle_alpha                 90
_cell_angle_beta                  90
_cell_angle_gamma                 90
_cell_volume                      9517.0(10)
_cell_formula_units_Z             8
_cell_measurement_temperature     223(2)
_cell_measurement_reflns_used    24712
_cell_measurement_theta_min      1.66
_cell_measurement_theta_max      27.21
 
_exptl_crystal_description       'block'
_exptl_crystal_colour            'colorless'
_exptl_crystal_density_meas       ?
_exptl_crystal_density_method     ?
_exptl_crystal_density_diffrn     1.501          
_exptl_crystal_F_000              4464
_exptl_transmission_factor_min    ?
_exptl_transmission_factor_max    ?
_exptl_crystal_size_max          0.450
_exptl_crystal_size_mid          0.290
_exptl_crystal_size_min          0.170
_exptl_absorpt_coefficient_mu     0.597
_shelx_estimated_absorpt_T_min    ?
_shelx_estimated_absorpt_T_max    ?
_exptl_absorpt_correction_type    numerical
_exptl_absorpt_correction_T_min   0.8040
_exptl_absorpt_correction_T_max   0.9159
loop_
    _exptl_crystal_face_index_h
    _exptl_crystal_face_index_k
    _exptl_crystal_face_index_l
    _exptl_crystal_face_perp_dist
  -2   8  29  0.2121
  -3  -1 -30  0.1634
  -1  28  12  0.2553
   1 -28 -12  0.1972
   8  -7 -13  0.4751
 -22  15  14  0.2069

_exptl_absorpt_process_details    'X-Area, X-RED (2008)'
_exptl_absorpt_special_details    ?
_diffrn_measurement_device         '2-circle goniometer'
_diffrn_measurement_device_type    'STOE IPDS 2'
_diffrn_detector                   'image plate (34 cm diameter)'
_diffrn_detector_type              'STOE'
_diffrn_detector_area_resol_mean   6.67
_diffrn_source           'sealed X-ray tube, 12 x 0.4 mm long-fine focus'
_diffrn_source_voltage             40
_diffrn_source_current             30
_diffrn_source_power               1.20
_diffrn_radiation_type             'Mo K\a'
_diffrn_radiation_wavelength       0.71073
_diffrn_radiation_monochromator    'plane graphite'
_diffrn_radiation_polarisn_norm    0
_diffrn_radiation_collimation      '0.5 mm diameter, multiple pinhole'
_diffrn_ambient_temperature        223
_diffrn_measurement_method         'rotation method'
_diffrn_measurement_details
; 180 frames, detector distance = 120 mm
;
_diffrn_reflns_number             28115
_diffrn_reflns_av_unetI/netI      0.1172
_diffrn_reflns_av_R_equivalents   0.1181
_diffrn_reflns_limit_h_min        -17
_diffrn_reflns_limit_h_max        16
_diffrn_reflns_limit_k_min        -23
_diffrn_reflns_limit_k_max        18
_diffrn_reflns_limit_l_min        -38
_diffrn_reflns_limit_l_max        35
_diffrn_reflns_theta_min          1.832
_diffrn_reflns_theta_max          25.100
_diffrn_reflns_theta_full         25.100
_diffrn_measured_fraction_theta_max   0.995
_diffrn_measured_fraction_theta_full  0.995
_diffrn_reflns_Laue_measured_fraction_max    0.995
_diffrn_reflns_Laue_measured_fraction_full   0.995
_diffrn_reflns_point_group_measured_fraction_max   0.995
_diffrn_reflns_point_group_measured_fraction_full  0.995
_reflns_number_total              8439
_reflns_number_gt                 4396
_reflns_threshold_expression      'I > 2\s(I)'
_reflns_Friedel_coverage          0.000
_reflns_Friedel_fraction_max      .
_reflns_Friedel_fraction_full     .
 
_reflns_special_details
;
 Reflections were merged by SHELXL according to the crystal
 class for the calculation of statistics and refinement.
 
 _reflns_Friedel_fraction is defined as the number of unique
 Friedel pairs measured divided by the number that would be
 possible theoretically, ignoring centric projections and
 systematic absences.
;
 
_computing_data_collection       'STOE X-AREA'
_computing_cell_refinement       'STOE X-AREA'
_computing_data_reduction        'STOE X-RED'
_computing_structure_solution    'SHELXL-97 (Sheldrick, 2008)'
_computing_structure_refinement  'SHELXL-2018/3 (Sheldrick, 2018)'
_computing_molecular_graphics     ?
_computing_publication_material   ?
_refine_special_details           ?
_refine_ls_structure_factor_coef  Fsqd
_refine_ls_matrix_type            full
_refine_ls_weighting_scheme       calc
_refine_ls_weighting_details
'w=1/[\s^2^(Fo^2^)+(0.0400P)^2^] where P=(Fo^2^+2Fc^2^)/3'
_atom_sites_solution_primary      direct
_atom_sites_solution_secondary    difmap
_atom_sites_solution_hydrogens    mixed
_refine_ls_hydrogen_treatment     mixed
_refine_ls_extinction_method      none
_refine_ls_extinction_coef        .
_refine_ls_number_reflns          8439
_refine_ls_number_parameters      709
_refine_ls_number_restraints      4
_refine_ls_R_factor_all           0.1277
_refine_ls_R_factor_gt            0.0536
_refine_ls_wR_factor_ref          0.1162
_refine_ls_wR_factor_gt           0.0948
_refine_ls_goodness_of_fit_ref    0.908
_refine_ls_restrained_S_all       0.908
_refine_ls_shift/su_max           0.001
_refine_ls_shift/su_mean          0.000
 
loop_
 _atom_site_label
 _atom_site_type_symbol
 _atom_site_fract_x
 _atom_site_fract_y
 _atom_site_fract_z
 _atom_site_U_iso_or_equiv
 _atom_site_adp_type
 _atom_site_occupancy
 _atom_site_site_symmetry_order  
 _atom_site_calc_flag
 _atom_site_refinement_flags_posn
 _atom_site_refinement_flags_adp
 _atom_site_refinement_flags_occupancy
 _atom_site_disorder_assembly
 _atom_site_disorder_group
Zn Zn 0.47962(3) 0.48581(3) 0.35760(2) 0.03545(13) Uani 1 1 d . . . . .
O1 O 0.1324(2) 0.67076(16) 0.44770(10) 0.0476(8) Uani 1 1 d . . . . .
O2 O -0.0118(2) 0.71368(16) 0.33799(10) 0.0482(8) Uani 1 1 d . . . . .
O3 O -0.0689(2) 0.66356(17) 0.39413(9) 0.0456(8) Uani 1 1 d . . . . .
O4 O 0.1911(2) 0.36640(16) 0.46109(9) 0.0527(9) Uani 1 1 d . . . . .
O5 O 0.2437(3) 0.18186(19) 0.56224(12) 0.0668(11) Uani 1 1 d . . . . .
O6 O 0.3005(3) 0.2815(2) 0.57322(13) 0.0822(14) Uani 1 1 d . . . . .
O7 O 0.0224(2) 0.53510(15) 0.61536(9) 0.0415(7) Uani 1 1 d . . . . .
O8 O -0.0361(2) 0.7231(2) 0.66142(12) 0.0662(11) Uani 1 1 d . . . . .
O9 O 0.0506(3) 0.76567(18) 0.61254(12) 0.0610(10) Uani 1 1 d . . . . .
H9 H 0.121(4) 0.765(3) 0.5927(19) 0.091 Uiso 1 1 d . U . . .
O10 O 0.2677(3) 0.2708(2) 0.41064(11) 0.0537(10) Uani 1 1 d D . . . .
H10A H 0.241(4) 0.293(3) 0.4288(15) 0.081 Uiso 1 1 d D U . . .
H10B H 0.297(4) 0.245(3) 0.4207(19) 0.081 Uiso 1 1 d . U . . .
O11 O 0.3535(3) 0.2534(2) 0.29228(12) 0.0636(11) Uani 1 1 d . . . . .
H11A H 0.303(5) 0.248(4) 0.304(2) 0.095 Uiso 1 1 d . U . . .
H11B H 0.404(4) 0.246(3) 0.309(2) 0.095 Uiso 1 1 d . U . . .
O12 O 0.6589(3) 0.7236(2) 0.29306(14) 0.0695(12) Uani 1 1 d . . . . .
H12A H 0.656(4) 0.741(3) 0.265(2) 0.104 Uiso 1 1 d . U . . .
H12B H 0.707(5) 0.739(4) 0.302(2) 0.104 Uiso 1 1 d . U . . .
O13 O 0.6874(3) 0.2652(2) 0.33993(11) 0.0680(12) Uani 1 1 d D . . . .
H13A H 0.712(4) 0.261(4) 0.3644(12) 0.102 Uiso 1 1 d D U . . .
H13B H 0.624(5) 0.248(3) 0.3404(19) 0.102 Uiso 1 1 d . U . . .
O14 O 0.2041(3) 0.2137(2) 0.33954(12) 0.0676(11) Uani 1 1 d D . . . .
H14C H 0.216(4) 0.235(3) 0.3630(13) 0.101 Uiso 1 1 d D U . . .
H14D H 0.158(3) 0.236(3) 0.330(2) 0.101 Uiso 1 1 d D U . . .
N1 N 0.0868(3) 0.58761(19) 0.40479(11) 0.0395(9) Uani 1 1 d . . . . .
H1 H 0.074735 0.545443 0.402127 0.047 Uiso 1 1 calc R U . . .
N2 N 0.1588(3) 0.33766(17) 0.52691(11) 0.0374(9) Uani 1 1 d . . . . .
H2 H 0.138593 0.350455 0.550928 0.045 Uiso 1 1 calc R U . . .
N3 N 0.1095(3) 0.62659(18) 0.60289(10) 0.0383(9) Uani 1 1 d . . . . .
H3 H 0.145186 0.646303 0.585193 0.046 Uiso 1 1 calc R U . . .
N4 N 0.4839(3) 0.41425(18) 0.40765(10) 0.0369(8) Uani 1 1 d . . . . .
N5 N 0.4365(2) 0.54423(19) 0.40985(11) 0.0379(9) Uani 1 1 d . . . . .
N6 N 0.6200(2) 0.51753(19) 0.35447(11) 0.0386(8) Uani 1 1 d . . . . .
N7 N 0.5371(2) 0.41898(19) 0.31210(10) 0.0371(9) Uani 1 1 d . . . . .
N8 N 0.3368(2) 0.45990(18) 0.34572(10) 0.0341(8) Uani 1 1 d . . . . .
N9 N 0.4379(2) 0.55934(19) 0.31177(11) 0.0365(9) Uani 1 1 d . . . . .
C1 C 0.1148(3) 0.5634(2) 0.47691(13) 0.0319(10) Uani 1 1 d . . . . .
C2 C 0.1334(3) 0.4962(2) 0.47110(12) 0.0330(10) Uani 1 1 d . . . . .
H2A H 0.145118 0.480264 0.444288 0.040 Uiso 1 1 calc R U . . .
C3 C 0.1350(3) 0.4516(2) 0.50454(13) 0.0305(10) Uani 1 1 d . . . . .
C4 C 0.1137(3) 0.4759(2) 0.54381(12) 0.0316(10) Uani 1 1 d . . . . .
H4 H 0.110580 0.446338 0.566281 0.038 Uiso 1 1 calc R U . . .
C5 C 0.0969(3) 0.5434(2) 0.55016(12) 0.0307(10) Uani 1 1 d . . . . .
C6 C 0.0989(3) 0.5874(2) 0.51668(13) 0.0336(10) Uani 1 1 d . . . . .
H6 H 0.089612 0.633126 0.521002 0.040 Uiso 1 1 calc R U . . .
C7 C 0.1125(3) 0.6115(2) 0.44169(13) 0.0362(11) Uani 1 1 d . . . . .
C8 C 0.0789(3) 0.6314(2) 0.36910(12) 0.0394(11) Uani 1 1 d . . . . .
H8C H 0.082539 0.604353 0.343949 0.047 Uiso 1 1 calc R U . . .
H8D H 0.131225 0.661864 0.368988 0.047 Uiso 1 1 calc R U . . .
C9 C -0.0082(3) 0.6724(2) 0.36755(13) 0.0378(11) Uani 1 1 d . . . . .
C10 C 0.1624(3) 0.3821(2) 0.49594(13) 0.0341(10) Uani 1 1 d . . . . .
C11 C 0.1873(3) 0.2693(2) 0.52173(13) 0.0386(11) Uani 1 1 d . . . . .
H11C H 0.219140 0.265300 0.495199 0.046 Uiso 1 1 calc R U . . .
H11D H 0.132674 0.241215 0.520335 0.046 Uiso 1 1 calc R U . . .
C12 C 0.2486(3) 0.2428(2) 0.55517(13) 0.0385(11) Uani 1 1 d . . . . .
C13 C 0.0729(3) 0.5677(2) 0.59250(13) 0.0316(10) Uani 1 1 d . . . . .
C14 C 0.0924(3) 0.6590(2) 0.64236(14) 0.0391(10) Uani 1 1 d . . . . .
H14A H 0.150864 0.673161 0.654250 0.047 Uiso 1 1 calc R U . . .
H14B H 0.064992 0.626689 0.661354 0.047 Uiso 1 1 calc R U . . .
C15 C 0.0304(3) 0.7185(2) 0.63900(15) 0.0445(11) Uani 1 1 d . . . . .
C16 C 0.5051(3) 0.3502(2) 0.40594(14) 0.0439(12) Uani 1 1 d . . . . .
H16 H 0.533767 0.334113 0.381947 0.053 Uiso 1 1 calc R U . . .
C17 C 0.4872(3) 0.3059(2) 0.43765(15) 0.0482(12) Uani 1 1 d . . . . .
H17 H 0.503276 0.260757 0.435079 0.058 Uiso 1 1 calc R U . . .
C18 C 0.4458(3) 0.3286(3) 0.47273(15) 0.0455(12) Uani 1 1 d . . . . .
H18 H 0.432382 0.298869 0.494305 0.055 Uiso 1 1 calc R U . . .
C19 C 0.4233(3) 0.3959(2) 0.47681(13) 0.0379(11) Uani 1 1 d . . . . .
C20 C 0.3804(3) 0.4240(3) 0.51226(13) 0.0443(13) Uani 1 1 d . . . . .
H20 H 0.366825 0.396474 0.534920 0.053 Uiso 1 1 calc R U . . .
C21 C 0.3589(3) 0.4892(3) 0.51409(13) 0.0425(12) Uani 1 1 d . . . . .
H21 H 0.331871 0.506476 0.538177 0.051 Uiso 1 1 calc R U . . .
C22 C 0.3769(3) 0.5330(2) 0.47959(12) 0.0366(11) Uani 1 1 d . . . . .
C23 C 0.3537(3) 0.6009(3) 0.47920(15) 0.0459(12) Uani 1 1 d . . . . .
H23 H 0.325118 0.620246 0.502269 0.055 Uiso 1 1 calc R U . . .
C24 C 0.3730(3) 0.6387(3) 0.44498(15) 0.0512(13) Uani 1 1 d . . . . .
H24 H 0.359084 0.684377 0.444546 0.061 Uiso 1 1 calc R U . . .
C25 C 0.4137(3) 0.6083(2) 0.41079(15) 0.0430(11) Uani 1 1 d . . . . .
H25 H 0.425508 0.634335 0.387263 0.052 Uiso 1 1 calc R U . . .
C26 C 0.4189(3) 0.5064(2) 0.44401(12) 0.0327(10) Uani 1 1 d . . . . .
C27 C 0.4432(3) 0.4375(2) 0.44287(12) 0.0332(10) Uani 1 1 d . . . . .
C28 C 0.6590(3) 0.5687(3) 0.37353(14) 0.0438(12) Uani 1 1 d . . . . .
H28 H 0.622799 0.594751 0.391258 0.053 Uiso 1 1 calc R U . . .
C29 C 0.7502(3) 0.5858(3) 0.36868(14) 0.0493(13) Uani 1 1 d . . . . .
H29 H 0.774937 0.622641 0.382651 0.059 Uiso 1 1 calc R U . . .
C30 C 0.8038(3) 0.5475(3) 0.34293(15) 0.0487(13) Uani 1 1 d . . . . .
H30 H 0.866182 0.557481 0.339862 0.058 Uiso 1 1 calc R U . . .
C31 C 0.7657(3) 0.4935(3) 0.32122(13) 0.0399(12) Uani 1 1 d . . . . .
C32 C 0.8144(3) 0.4534(3) 0.29188(15) 0.0477(13) Uani 1 1 d . . . . .
H32 H 0.876959 0.461176 0.287476 0.057 Uiso 1 1 calc R U . . .
C33 C 0.7721(3) 0.4046(3) 0.27050(15) 0.0488(13) Uani 1 1 d . . . . .
H33 H 0.806034 0.379032 0.251631 0.059 Uiso 1 1 calc R U . . .
C34 C 0.6768(3) 0.3909(2) 0.27586(14) 0.0411(12) Uani 1 1 d . . . . .
C35 C 0.6281(4) 0.3437(2) 0.25265(14) 0.0497(13) Uani 1 1 d . . . . .
H35 H 0.658221 0.318072 0.232511 0.060 Uiso 1 1 calc R U . . .
C36 C 0.5371(4) 0.3352(2) 0.25945(14) 0.0491(13) Uani 1 1 d . . . . .
H36 H 0.503702 0.304572 0.243484 0.059 Uiso 1 1 calc R U . . .
C37 C 0.4938(3) 0.3718(2) 0.28999(13) 0.0422(12) Uani 1 1 d . . . . .
H37 H 0.431824 0.363447 0.295480 0.051 Uiso 1 1 calc R U . . .
C38 C 0.6279(3) 0.4286(2) 0.30513(12) 0.0355(11) Uani 1 1 d . . . . .
C39 C 0.6718(3) 0.4807(2) 0.32805(12) 0.0364(10) Uani 1 1 d . . . . .
C40 C 0.2868(3) 0.4131(2) 0.36342(14) 0.0447(12) Uani 1 1 d . . . . .
H40 H 0.316117 0.383127 0.381381 0.054 Uiso 1 1 calc R U . . .
C41 C 0.1927(3) 0.4053(3) 0.35702(16) 0.0474(12) Uani 1 1 d . . . . .
H41 H 0.159572 0.372538 0.371308 0.057 Uiso 1 1 calc R U . . .
C42 C 0.1503(3) 0.4468(3) 0.32941(13) 0.0428(12) Uani 1 1 d . . . . .
H42 H 0.087662 0.441921 0.323921 0.051 Uiso 1 1 calc R U . . .
C43 C 0.2015(3) 0.4973(2) 0.30908(13) 0.0365(11) Uani 1 1 d . . . . .
C44 C 0.1627(3) 0.5408(2) 0.27915(14) 0.0418(12) Uani 1 1 d . . . . .
H44 H 0.100329 0.537221 0.272653 0.050 Uiso 1 1 calc R U . . .
C45 C 0.2145(3) 0.5875(2) 0.25983(14) 0.0413(12) Uani 1 1 d . . . . .
H45 H 0.187537 0.615478 0.239992 0.050 Uiso 1 1 calc R U . . .
C46 C 0.3092(3) 0.5947(2) 0.26919(13) 0.0369(11) Uani 1 1 d . . . . .
C47 C 0.3662(4) 0.6411(2) 0.24993(14) 0.0450(12) Uani 1 1 d . . . . .
H47 H 0.343258 0.668326 0.228704 0.054 Uiso 1 1 calc R U . . .
C48 C 0.4554(4) 0.6470(2) 0.26194(14) 0.0469(13) Uani 1 1 d . . . . .
H48 H 0.494098 0.677878 0.248953 0.056 Uiso 1 1 calc R U . . .
C49 C 0.4883(3) 0.6065(2) 0.29369(13) 0.0407(11) Uani 1 1 d . . . . .
H49 H 0.548708 0.612679 0.302768 0.049 Uiso 1 1 calc R U . . .
C50 C 0.3482(3) 0.5534(2) 0.29967(12) 0.0329(10) Uani 1 1 d . . . . .
C51 C 0.2941(3) 0.5024(2) 0.31903(12) 0.0334(11) Uani 1 1 d . . . . .
 
loop_
 _atom_site_aniso_label
 _atom_site_aniso_U_11
 _atom_site_aniso_U_22
 _atom_site_aniso_U_33
 _atom_site_aniso_U_23
 _atom_site_aniso_U_13
 _atom_site_aniso_U_12
Zn 0.0369(2) 0.0355(3) 0.0340(2) 0.0005(2) 0.0010(2) 0.0004(3)
O1 0.063(2) 0.032(2) 0.048(2) 0.0042(15) -0.0022(16) -0.0075(18)
O2 0.051(2) 0.049(2) 0.0452(18) 0.0161(16) 0.0034(16) 0.0101(18)
O3 0.0440(19) 0.053(2) 0.0394(18) 0.0032(15) 0.0040(15) -0.0037(17)
O4 0.086(3) 0.040(2) 0.0316(18) 0.0031(14) 0.0132(17) 0.0195(19)
O5 0.063(2) 0.040(2) 0.097(3) 0.021(2) -0.027(2) 0.001(2)
O6 0.114(3) 0.041(2) 0.092(3) -0.004(2) -0.066(3) 0.004(2)
O7 0.0474(17) 0.0350(18) 0.0423(17) -0.0023(13) 0.0079(15) -0.0086(17)
O8 0.052(2) 0.080(3) 0.066(2) -0.005(2) 0.0129(19) 0.010(2)
O9 0.066(2) 0.046(2) 0.071(3) 0.0079(19) 0.012(2) 0.0153(19)
O10 0.072(3) 0.046(2) 0.044(2) -0.0020(17) -0.0026(18) 0.016(2)
O11 0.058(2) 0.075(3) 0.058(2) 0.017(2) -0.0098(19) -0.010(2)
O12 0.064(3) 0.078(3) 0.067(3) -0.025(2) 0.011(2) -0.007(2)
O13 0.054(2) 0.100(3) 0.050(2) 0.022(2) 0.0024(19) -0.019(2)
O14 0.058(2) 0.087(3) 0.058(2) -0.018(2) -0.006(2) 0.010(2)
N1 0.055(2) 0.030(2) 0.033(2) 0.0066(16) -0.0014(17) 0.0022(19)
N2 0.054(2) 0.025(2) 0.033(2) 0.0014(16) -0.0005(17) 0.0050(19)
N3 0.051(2) 0.029(2) 0.034(2) -0.0042(16) 0.0091(17) -0.0082(19)
N4 0.041(2) 0.035(2) 0.0357(19) -0.0015(16) -0.0008(17) 0.002(2)
N5 0.037(2) 0.032(2) 0.044(2) 0.0037(18) -0.0020(17) 0.0026(18)
N6 0.044(2) 0.038(2) 0.0333(18) -0.0025(18) -0.0039(17) 0.000(2)
N7 0.036(2) 0.041(2) 0.035(2) 0.0001(17) -0.0013(16) -0.0026(19)
N8 0.041(2) 0.029(2) 0.0323(19) 0.0051(15) 0.0004(16) -0.0045(18)
N9 0.037(2) 0.038(2) 0.035(2) 0.0000(17) 0.0034(16) -0.0044(19)
C1 0.034(2) 0.029(3) 0.032(2) 0.0038(19) -0.0008(19) -0.004(2)
C2 0.032(2) 0.033(3) 0.034(2) 0.0022(19) 0.0011(17) 0.002(2)
C3 0.031(2) 0.025(3) 0.036(2) 0.0015(19) -0.0018(18) 0.001(2)
C4 0.033(2) 0.029(3) 0.033(2) 0.0038(19) -0.0028(17) -0.003(2)
C5 0.034(2) 0.031(3) 0.027(2) 0.0007(18) 0.0029(17) -0.003(2)
C6 0.035(2) 0.027(3) 0.039(2) 0.0027(19) 0.0025(19) -0.002(2)
C7 0.038(3) 0.035(3) 0.035(2) 0.004(2) 0.005(2) 0.004(2)
C8 0.052(3) 0.036(3) 0.030(2) 0.0076(19) 0.003(2) 0.009(2)
C9 0.046(3) 0.034(3) 0.033(3) -0.0036(19) -0.009(2) -0.001(2)
C10 0.039(3) 0.029(3) 0.034(2) 0.004(2) -0.004(2) 0.004(2)
C11 0.053(3) 0.026(3) 0.037(2) -0.0002(19) -0.002(2) 0.005(2)
C12 0.043(3) 0.031(3) 0.041(2) -0.003(2) -0.003(2) 0.007(2)
C13 0.036(2) 0.024(2) 0.035(2) 0.000(2) 0.0006(19) -0.001(2)
C14 0.050(3) 0.032(3) 0.035(2) -0.006(2) 0.002(2) -0.002(2)
C15 0.046(3) 0.043(3) 0.044(3) -0.003(2) 0.001(2) -0.004(3)
C16 0.050(3) 0.039(3) 0.043(3) -0.003(2) -0.002(2) 0.005(2)
C17 0.058(3) 0.030(3) 0.056(3) -0.002(2) -0.008(3) 0.005(3)
C18 0.045(3) 0.042(3) 0.050(3) 0.009(2) -0.009(2) -0.005(2)
C19 0.036(3) 0.044(3) 0.033(2) 0.001(2) -0.0038(19) -0.003(2)
C20 0.043(3) 0.055(4) 0.035(3) 0.002(2) -0.001(2) -0.009(3)
C21 0.032(2) 0.057(4) 0.038(2) -0.001(2) 0.0017(19) -0.003(3)
C22 0.034(2) 0.043(3) 0.033(2) -0.006(2) 0.0017(19) 0.000(2)
C23 0.040(3) 0.047(3) 0.051(3) -0.014(2) 0.006(2) 0.005(3)
C24 0.057(3) 0.044(3) 0.053(3) -0.011(3) 0.001(3) 0.012(3)
C25 0.052(3) 0.032(3) 0.044(3) 0.002(2) 0.000(2) 0.003(2)
C26 0.027(2) 0.037(3) 0.034(2) -0.003(2) -0.0038(16) 0.000(2)
C27 0.034(2) 0.036(3) 0.030(2) -0.0009(19) -0.0034(18) -0.002(2)
C28 0.047(3) 0.047(3) 0.037(3) -0.004(2) -0.004(2) -0.007(3)
C29 0.046(3) 0.055(4) 0.046(3) 0.001(2) -0.014(2) -0.004(3)
C30 0.038(3) 0.056(3) 0.051(3) 0.012(3) -0.009(2) -0.010(3)
C31 0.040(3) 0.042(3) 0.037(2) 0.010(2) -0.0051(19) 0.007(2)
C32 0.037(3) 0.053(3) 0.053(3) 0.011(3) 0.004(2) 0.008(3)
C33 0.050(3) 0.049(3) 0.048(3) 0.007(3) 0.013(2) 0.011(3)
C34 0.047(3) 0.039(3) 0.037(3) 0.009(2) 0.002(2) 0.006(2)
C35 0.073(4) 0.037(3) 0.039(3) -0.002(2) 0.006(2) 0.007(3)
C36 0.066(4) 0.038(3) 0.043(3) -0.006(2) -0.004(3) -0.003(3)
C37 0.049(3) 0.036(3) 0.042(3) -0.002(2) -0.001(2) -0.013(2)
C38 0.042(3) 0.036(3) 0.029(2) 0.003(2) 0.0028(19) 0.005(2)
C39 0.041(3) 0.036(3) 0.032(2) 0.004(2) 0.0013(19) 0.002(2)
C40 0.047(3) 0.042(3) 0.045(3) 0.010(2) -0.005(2) -0.005(2)
C41 0.041(3) 0.049(3) 0.052(3) 0.005(3) 0.007(2) -0.012(2)
C42 0.037(3) 0.051(3) 0.041(3) -0.005(2) 0.001(2) -0.001(2)
C43 0.033(2) 0.035(3) 0.041(2) -0.005(2) 0.0011(19) 0.000(2)
C44 0.035(2) 0.047(3) 0.044(3) -0.009(2) -0.006(2) 0.009(2)
C45 0.048(3) 0.038(3) 0.038(3) -0.001(2) -0.004(2) 0.009(3)
C46 0.045(3) 0.028(3) 0.037(3) 0.003(2) 0.000(2) 0.005(2)
C47 0.064(3) 0.034(3) 0.037(3) 0.002(2) -0.001(2) 0.006(3)
C48 0.058(3) 0.037(3) 0.045(3) 0.009(2) 0.010(2) -0.003(3)
C49 0.043(3) 0.037(3) 0.041(3) 0.005(2) 0.005(2) -0.004(2)
C50 0.036(2) 0.033(3) 0.030(2) -0.0050(19) 0.0037(18) 0.003(2)
C51 0.034(2) 0.033(3) 0.034(2) -0.0015(19) 0.0038(18) 0.005(2)
 
_geom_special_details
;
 All esds (except the esd in the dihedral angle between two l.s. planes)
 are estimated using the full covariance matrix.  The cell esds are taken
 into account individually in the estimation of esds in distances, angles
 and torsion angles; correlations between esds in cell parameters are only
 used when they are defined by crystal symmetry.  An approximate (isotropic)
 treatment of cell esds is used for estimating esds involving l.s. planes.
;
 
loop_
 _geom_bond_atom_site_label_1
 _geom_bond_atom_site_label_2
 _geom_bond_distance
 _geom_bond_site_symmetry_2
 _geom_bond_publ_flag
Zn N5 2.152(4) . ?
Zn N6 2.155(3) . ?
Zn N7 2.163(4) . ?
Zn N4 2.166(4) . ?
Zn N9 2.180(4) . ?
Zn N8 2.189(4) . ?
O1 C7 1.241(5) . ?
O2 C9 1.267(5) . ?
O3 C9 1.249(5) . ?
O4 C10 1.244(5) . ?
O5 C12 1.248(6) . ?
O6 C12 1.234(6) . ?
O7 C13 1.234(5) . ?
O8 C15 1.217(6) . ?
O9 C15 1.311(6) . ?
O9 H9 1.22(6) . ?
O10 H10A 0.84(3) . ?
O10 H10B 0.75(6) . ?
O11 H11A 0.85(7) . ?
O11 H11B 0.94(7) . ?
O12 H12A 0.98(7) . ?
O12 H12B 0.82(7) . ?
O13 H13A 0.87(3) . ?
O13 H13B 0.99(7) . ?
O14 H14C 0.89(3) . ?
O14 H14D 0.86(3) . ?
N1 C7 1.340(6) . ?
N1 C8 1.456(5) . ?
N1 H1 0.8700 . ?
N2 C10 1.344(5) . ?
N2 C11 1.445(5) . ?
N2 H2 0.8700 . ?
N3 C13 1.342(5) . ?
N3 C14 1.455(5) . ?
N3 H3 0.8700 . ?
N4 C16 1.324(5) . ?
N4 C27 1.368(5) . ?
N5 C25 1.330(6) . ?
N5 C26 1.366(5) . ?
N6 C28 1.327(6) . ?
N6 C39 1.361(6) . ?
N7 C37 1.345(5) . ?
N7 C38 1.363(5) . ?
N8 C40 1.323(6) . ?
N8 C51 1.365(5) . ?
N9 C49 1.336(6) . ?
N9 C50 1.375(5) . ?
C1 C2 1.390(6) . ?
C1 C6 1.393(6) . ?
C1 C7 1.495(6) . ?
C2 C3 1.405(6) . ?
C2 H2A 0.9400 . ?
C3 C4 1.396(6) . ?
C3 C10 1.479(6) . ?
C4 C5 1.393(6) . ?
C4 H4 0.9400 . ?
C5 C6 1.398(6) . ?
C5 C13 1.496(6) . ?
C6 H6 0.9400 . ?
C8 C9 1.519(6) . ?
C8 H8C 0.9800 . ?
C8 H8D 0.9800 . ?
C11 C12 1.503(6) . ?
C11 H11C 0.9800 . ?
C11 H11D 0.9800 . ?
C14 C15 1.506(6) . ?
C14 H14A 0.9800 . ?
C14 H14B 0.9800 . ?
C16 C17 1.384(7) . ?
C16 H16 0.9400 . ?
C17 C18 1.365(7) . ?
C17 H17 0.9400 . ?
C18 C19 1.398(7) . ?
C18 H18 0.9400 . ?
C19 C27 1.410(6) . ?
C19 C20 1.423(6) . ?
C20 C21 1.349(7) . ?
C20 H20 0.9400 . ?
C21 C22 1.444(6) . ?
C21 H21 0.9400 . ?
C22 C23 1.406(7) . ?
C22 C26 1.410(6) . ?
C23 C24 1.372(7) . ?
C23 H23 0.9400 . ?
C24 C25 1.397(6) . ?
C24 H24 0.9400 . ?
C25 H25 0.9400 . ?
C26 C27 1.430(6) . ?
C28 C29 1.389(6) . ?
C28 H28 0.9400 . ?
C29 C30 1.379(7) . ?
C29 H29 0.9400 . ?
C30 C31 1.408(7) . ?
C30 H30 0.9400 . ?
C31 C39 1.416(6) . ?
C31 C32 1.436(7) . ?
C32 C33 1.349(7) . ?
C32 H32 0.9400 . ?
C33 C34 1.433(7) . ?
C33 H33 0.9400 . ?
C34 C35 1.405(7) . ?
C34 C38 1.407(6) . ?
C35 C36 1.362(7) . ?
C35 H35 0.9400 . ?
C36 C37 1.386(6) . ?
C36 H36 0.9400 . ?
C37 H37 0.9400 . ?
C38 C39 1.435(6) . ?
C40 C41 1.401(6) . ?
C40 H40 0.9400 . ?
C41 C42 1.370(7) . ?
C41 H41 0.9400 . ?
C42 C43 1.422(6) . ?
C42 H42 0.9400 . ?
C43 C51 1.398(6) . ?
C43 C44 1.423(6) . ?
C44 C45 1.359(7) . ?
C44 H44 0.9400 . ?
C45 C46 1.426(6) . ?
C45 H45 0.9400 . ?
C46 C47 1.398(7) . ?
C46 C50 1.410(6) . ?
C47 C48 1.367(7) . ?
C47 H47 0.9400 . ?
C48 C49 1.396(6) . ?
C48 H48 0.9400 . ?
C49 H49 0.9400 . ?
C50 C51 1.439(6) . ?
 
loop_
 _geom_angle_atom_site_label_1
 _geom_angle_atom_site_label_2
 _geom_angle_atom_site_label_3
 _geom_angle
 _geom_angle_site_symmetry_1
 _geom_angle_site_symmetry_3
 _geom_angle_publ_flag
N5 Zn N6 98.94(14) . . ?
N5 Zn N7 170.78(14) . . ?
N6 Zn N7 77.32(14) . . ?
N5 Zn N4 77.51(14) . . ?
N6 Zn N4 101.76(14) . . ?
N7 Zn N4 94.88(13) . . ?
N5 Zn N9 94.71(14) . . ?
N6 Zn N9 92.02(14) . . ?
N7 Zn N9 93.86(13) . . ?
N4 Zn N9 165.02(14) . . ?
N5 Zn N8 89.28(13) . . ?
N6 Zn N8 166.80(13) . . ?
N7 Zn N8 96.00(13) . . ?
N4 Zn N8 90.05(13) . . ?
N9 Zn N8 76.93(13) . . ?
C15 O9 H9 122(3) . . ?
H10A O10 H10B 110(6) . . ?
H11A O11 H11B 114(6) . . ?
H12A O12 H12B 103(6) . . ?
H13A O13 H13B 110(6) . . ?
H14C O14 H14D 103(6) . . ?
C7 N1 C8 120.8(4) . . ?
C7 N1 H1 119.6 . . ?
C8 N1 H1 119.6 . . ?
C10 N2 C11 122.3(4) . . ?
C10 N2 H2 118.9 . . ?
C11 N2 H2 118.9 . . ?
C13 N3 C14 123.1(4) . . ?
C13 N3 H3 118.5 . . ?
C14 N3 H3 118.5 . . ?
C16 N4 C27 118.0(4) . . ?
C16 N4 Zn 128.3(3) . . ?
C27 N4 Zn 112.5(3) . . ?
C25 N5 C26 118.2(4) . . ?
C25 N5 Zn 128.3(3) . . ?
C26 N5 Zn 112.8(3) . . ?
C28 N6 C39 118.3(4) . . ?
C28 N6 Zn 128.1(3) . . ?
C39 N6 Zn 113.6(3) . . ?
C37 N7 C38 118.1(4) . . ?
C37 N7 Zn 128.0(3) . . ?
C38 N7 Zn 113.9(3) . . ?
C40 N8 C51 117.7(4) . . ?
C40 N8 Zn 128.5(3) . . ?
C51 N8 Zn 113.5(3) . . ?
C49 N9 C50 117.7(4) . . ?
C49 N9 Zn 128.5(3) . . ?
C50 N9 Zn 113.7(3) . . ?
C2 C1 C6 119.6(4) . . ?
C2 C1 C7 122.0(4) . . ?
C6 C1 C7 118.4(4) . . ?
C1 C2 C3 121.2(4) . . ?
C1 C2 H2A 119.4 . . ?
C3 C2 H2A 119.4 . . ?
C4 C3 C2 118.3(4) . . ?
C4 C3 C10 124.2(4) . . ?
C2 C3 C10 117.5(4) . . ?
C5 C4 C3 121.0(4) . . ?
C5 C4 H4 119.5 . . ?
C3 C4 H4 119.5 . . ?
C4 C5 C6 119.8(4) . . ?
C4 C5 C13 119.6(4) . . ?
C6 C5 C13 120.5(4) . . ?
C1 C6 C5 120.0(4) . . ?
C1 C6 H6 120.0 . . ?
C5 C6 H6 120.0 . . ?
O1 C7 N1 123.3(4) . . ?
O1 C7 C1 119.7(4) . . ?
N1 C7 C1 116.9(4) . . ?
N1 C8 C9 114.8(4) . . ?
N1 C8 H8C 108.6 . . ?
C9 C8 H8C 108.6 . . ?
N1 C8 H8D 108.6 . . ?
C9 C8 H8D 108.6 . . ?
H8C C8 H8D 107.5 . . ?
O3 C9 O2 125.7(4) . . ?
O3 C9 C8 119.9(4) . . ?
O2 C9 C8 114.5(4) . . ?
O4 C10 N2 121.3(4) . . ?
O4 C10 C3 120.1(4) . . ?
N2 C10 C3 118.5(4) . . ?
N2 C11 C12 115.2(4) . . ?
N2 C11 H11C 108.5 . . ?
C12 C11 H11C 108.5 . . ?
N2 C11 H11D 108.5 . . ?
C12 C11 H11D 108.5 . . ?
H11C C11 H11D 107.5 . . ?
O6 C12 O5 124.5(5) . . ?
O6 C12 C11 119.0(4) . . ?
O5 C12 C11 116.4(4) . . ?
O7 C13 N3 123.9(4) . . ?
O7 C13 C5 121.1(4) . . ?
N3 C13 C5 115.0(4) . . ?
N3 C14 C15 113.3(4) . . ?
N3 C14 H14A 108.9 . . ?
C15 C14 H14A 108.9 . . ?
N3 C14 H14B 108.9 . . ?
C15 C14 H14B 108.9 . . ?
H14A C14 H14B 107.7 . . ?
O8 C15 O9 121.0(5) . . ?
O8 C15 C14 119.9(4) . . ?
O9 C15 C14 119.0(4) . . ?
N4 C16 C17 123.4(4) . . ?
N4 C16 H16 118.3 . . ?
C17 C16 H16 118.3 . . ?
C18 C17 C16 118.9(5) . . ?
C18 C17 H17 120.5 . . ?
C16 C17 H17 120.5 . . ?
C17 C18 C19 120.5(4) . . ?
C17 C18 H18 119.7 . . ?
C19 C18 H18 119.7 . . ?
C18 C19 C27 116.8(4) . . ?
C18 C19 C20 124.3(4) . . ?
C27 C19 C20 118.9(5) . . ?
C21 C20 C19 121.6(4) . . ?
C21 C20 H20 119.2 . . ?
C19 C20 H20 119.2 . . ?
C20 C21 C22 121.0(4) . . ?
C20 C21 H21 119.5 . . ?
C22 C21 H21 119.5 . . ?
C23 C22 C26 117.7(4) . . ?
C23 C22 C21 123.6(4) . . ?
C26 C22 C21 118.7(4) . . ?
C24 C23 C22 119.7(4) . . ?
C24 C23 H23 120.2 . . ?
C22 C23 H23 120.2 . . ?
C23 C24 C25 118.9(5) . . ?
C23 C24 H24 120.5 . . ?
C25 C24 H24 120.5 . . ?
N5 C25 C24 123.3(5) . . ?
N5 C25 H25 118.3 . . ?
C24 C25 H25 118.3 . . ?
N5 C26 C22 122.1(4) . . ?
N5 C26 C27 118.1(4) . . ?
C22 C26 C27 119.7(4) . . ?
N4 C27 C19 122.4(4) . . ?
N4 C27 C26 117.4(4) . . ?
C19 C27 C26 120.1(4) . . ?
N6 C28 C29 123.5(5) . . ?
N6 C28 H28 118.2 . . ?
C29 C28 H28 118.2 . . ?
C30 C29 C28 118.5(5) . . ?
C30 C29 H29 120.7 . . ?
C28 C29 H29 120.7 . . ?
C29 C30 C31 120.3(4) . . ?
C29 C30 H30 119.8 . . ?
C31 C30 H30 119.8 . . ?
C30 C31 C39 116.6(4) . . ?
C30 C31 C32 124.4(5) . . ?
C39 C31 C32 118.9(4) . . ?
C33 C32 C31 121.2(5) . . ?
C33 C32 H32 119.4 . . ?
C31 C32 H32 119.4 . . ?
C32 C33 C34 121.6(5) . . ?
C32 C33 H33 119.2 . . ?
C34 C33 H33 119.2 . . ?
C35 C34 C38 117.7(4) . . ?
C35 C34 C33 124.0(5) . . ?
C38 C34 C33 118.3(5) . . ?
C36 C35 C34 119.7(5) . . ?
C36 C35 H35 120.2 . . ?
C34 C35 H35 120.2 . . ?
C35 C36 C37 119.7(5) . . ?
C35 C36 H36 120.1 . . ?
C37 C36 H36 120.1 . . ?
N7 C37 C36 122.5(4) . . ?
N7 C37 H37 118.7 . . ?
C36 C37 H37 118.7 . . ?
N7 C38 C34 122.1(4) . . ?
N7 C38 C39 117.0(4) . . ?
C34 C38 C39 120.8(4) . . ?
N6 C39 C31 122.7(4) . . ?
N6 C39 C38 118.2(4) . . ?
C31 C39 C38 119.1(4) . . ?
N8 C40 C41 124.0(4) . . ?
N8 C40 H40 118.0 . . ?
C41 C40 H40 118.0 . . ?
C42 C41 C40 118.3(4) . . ?
C42 C41 H41 120.8 . . ?
C40 C41 H41 120.8 . . ?
C41 C42 C43 119.8(4) . . ?
C41 C42 H42 120.1 . . ?
C43 C42 H42 120.1 . . ?
C51 C43 C42 117.2(4) . . ?
C51 C43 C44 120.0(4) . . ?
C42 C43 C44 122.9(4) . . ?
C45 C44 C43 121.0(4) . . ?
C45 C44 H44 119.5 . . ?
C43 C44 H44 119.5 . . ?
C44 C45 C46 121.0(4) . . ?
C44 C45 H45 119.5 . . ?
C46 C45 H45 119.5 . . ?
C47 C46 C50 117.5(4) . . ?
C47 C46 C45 123.7(4) . . ?
C50 C46 C45 118.9(4) . . ?
C48 C47 C46 120.1(4) . . ?
C48 C47 H47 120.0 . . ?
C46 C47 H47 120.0 . . ?
C47 C48 C49 119.3(5) . . ?
C47 C48 H48 120.4 . . ?
C49 C48 H48 120.4 . . ?
N9 C49 C48 123.0(4) . . ?
N9 C49 H49 118.5 . . ?
C48 C49 H49 118.5 . . ?
N9 C50 C46 122.4(4) . . ?
N9 C50 C51 117.6(4) . . ?
C46 C50 C51 120.0(4) . . ?
N8 C51 C43 123.0(4) . . ?
N8 C51 C50 118.0(4) . . ?
C43 C51 C50 119.0(4) . . ?
 
loop_
 _geom_torsion_atom_site_label_1
 _geom_torsion_atom_site_label_2
 _geom_torsion_atom_site_label_3
 _geom_torsion_atom_site_label_4
 _geom_torsion
 _geom_torsion_site_symmetry_1
 _geom_torsion_site_symmetry_2
 _geom_torsion_site_symmetry_3
 _geom_torsion_site_symmetry_4
 _geom_torsion_publ_flag
C6 C1 C2 C3 1.1(6) . . . . ?
C7 C1 C2 C3 -179.8(4) . . . . ?
C1 C2 C3 C4 2.6(6) . . . . ?
C1 C2 C3 C10 -175.4(4) . . . . ?
C2 C3 C4 C5 -4.0(6) . . . . ?
C10 C3 C4 C5 173.8(4) . . . . ?
C3 C4 C5 C6 1.7(6) . . . . ?
C3 C4 C5 C13 179.1(4) . . . . ?
C2 C1 C6 C5 -3.4(6) . . . . ?
C7 C1 C6 C5 177.4(4) . . . . ?
C4 C5 C6 C1 2.0(6) . . . . ?
C13 C5 C6 C1 -175.3(4) . . . . ?
C8 N1 C7 O1 -1.3(7) . . . . ?
C8 N1 C7 C1 177.4(4) . . . . ?
C2 C1 C7 O1 -151.0(4) . . . . ?
C6 C1 C7 O1 28.1(6) . . . . ?
C2 C1 C7 N1 30.2(6) . . . . ?
C6 C1 C7 N1 -150.7(4) . . . . ?
C7 N1 C8 C9 -79.4(5) . . . . ?
N1 C8 C9 O3 -4.7(6) . . . . ?
N1 C8 C9 O2 175.3(4) . . . . ?
C11 N2 C10 O4 -0.4(7) . . . . ?
C11 N2 C10 C3 -177.7(4) . . . . ?
C4 C3 C10 O4 -171.1(4) . . . . ?
C2 C3 C10 O4 6.8(6) . . . . ?
C4 C3 C10 N2 6.3(7) . . . . ?
C2 C3 C10 N2 -175.8(4) . . . . ?
C10 N2 C11 C12 133.0(4) . . . . ?
N2 C11 C12 O6 -30.4(7) . . . . ?
N2 C11 C12 O5 150.5(4) . . . . ?
C14 N3 C13 O7 -0.9(7) . . . . ?
C14 N3 C13 C5 178.6(4) . . . . ?
C4 C5 C13 O7 -39.1(6) . . . . ?
C6 C5 C13 O7 138.2(4) . . . . ?
C4 C5 C13 N3 141.4(4) . . . . ?
C6 C5 C13 N3 -41.3(6) . . . . ?
C13 N3 C14 C15 -107.0(5) . . . . ?
N3 C14 C15 O8 128.6(5) . . . . ?
N3 C14 C15 O9 -53.2(6) . . . . ?
C27 N4 C16 C17 0.8(7) . . . . ?
Zn N4 C16 C17 -165.7(4) . . . . ?
N4 C16 C17 C18 -0.2(8) . . . . ?
C16 C17 C18 C19 -1.0(7) . . . . ?
C17 C18 C19 C27 1.6(7) . . . . ?
C17 C18 C19 C20 -179.8(4) . . . . ?
C18 C19 C20 C21 -178.8(5) . . . . ?
C27 C19 C20 C21 -0.2(7) . . . . ?
C19 C20 C21 C22 1.4(7) . . . . ?
C20 C21 C22 C23 178.1(5) . . . . ?
C20 C21 C22 C26 -1.1(6) . . . . ?
C26 C22 C23 C24 -0.5(7) . . . . ?
C21 C22 C23 C24 -179.7(4) . . . . ?
C22 C23 C24 C25 1.4(7) . . . . ?
C26 N5 C25 C24 0.2(7) . . . . ?
Zn N5 C25 C24 169.5(4) . . . . ?
C23 C24 C25 N5 -1.3(8) . . . . ?
C25 N5 C26 C22 0.7(6) . . . . ?
Zn N5 C26 C22 -170.2(3) . . . . ?
C25 N5 C26 C27 179.7(4) . . . . ?
Zn N5 C26 C27 8.8(5) . . . . ?
C23 C22 C26 N5 -0.6(6) . . . . ?
C21 C22 C26 N5 178.7(4) . . . . ?
C23 C22 C26 C27 -179.6(4) . . . . ?
C21 C22 C26 C27 -0.3(6) . . . . ?
C16 N4 C27 C19 -0.2(6) . . . . ?
Zn N4 C27 C19 168.4(3) . . . . ?
C16 N4 C27 C26 -178.7(4) . . . . ?
Zn N4 C27 C26 -10.2(5) . . . . ?
C18 C19 C27 N4 -1.0(6) . . . . ?
C20 C19 C27 N4 -179.7(4) . . . . ?
C18 C19 C27 C26 177.5(4) . . . . ?
C20 C19 C27 C26 -1.2(6) . . . . ?
N5 C26 C27 N4 1.0(6) . . . . ?
C22 C26 C27 N4 -180.0(4) . . . . ?
N5 C26 C27 C19 -177.6(4) . . . . ?
C22 C26 C27 C19 1.4(6) . . . . ?
C39 N6 C28 C29 -1.5(7) . . . . ?
Zn N6 C28 C29 -178.6(3) . . . . ?
N6 C28 C29 C30 -0.4(7) . . . . ?
C28 C29 C30 C31 1.8(7) . . . . ?
C29 C30 C31 C39 -1.2(7) . . . . ?
C29 C30 C31 C32 176.1(5) . . . . ?
C30 C31 C32 C33 -176.3(5) . . . . ?
C39 C31 C32 C33 0.9(7) . . . . ?
C31 C32 C33 C34 0.4(7) . . . . ?
C32 C33 C34 C35 175.9(5) . . . . ?
C32 C33 C34 C38 -1.8(7) . . . . ?
C38 C34 C35 C36 -1.0(7) . . . . ?
C33 C34 C35 C36 -178.7(5) . . . . ?
C34 C35 C36 C37 -1.8(7) . . . . ?
C38 N7 C37 C36 -2.9(7) . . . . ?
Zn N7 C37 C36 175.2(3) . . . . ?
C35 C36 C37 N7 3.9(7) . . . . ?
C37 N7 C38 C34 -0.1(6) . . . . ?
Zn N7 C38 C34 -178.4(3) . . . . ?
C37 N7 C38 C39 177.9(4) . . . . ?
Zn N7 C38 C39 -0.5(5) . . . . ?
C35 C34 C38 N7 1.9(7) . . . . ?
C33 C34 C38 N7 179.8(4) . . . . ?
C35 C34 C38 C39 -175.9(4) . . . . ?
C33 C34 C38 C39 2.0(7) . . . . ?
C28 N6 C39 C31 2.1(6) . . . . ?
Zn N6 C39 C31 179.6(3) . . . . ?
C28 N6 C39 C38 -175.4(4) . . . . ?
Zn N6 C39 C38 2.1(5) . . . . ?
C30 C31 C39 N6 -0.8(6) . . . . ?
C32 C31 C39 N6 -178.2(4) . . . . ?
C30 C31 C39 C38 176.7(4) . . . . ?
C32 C31 C39 C38 -0.7(6) . . . . ?
N7 C38 C39 N6 -1.0(6) . . . . ?
C34 C38 C39 N6 176.9(4) . . . . ?
N7 C38 C39 C31 -178.7(4) . . . . ?
C34 C38 C39 C31 -0.7(6) . . . . ?
C51 N8 C40 C41 -1.3(7) . . . . ?
Zn N8 C40 C41 172.3(4) . . . . ?
N8 C40 C41 C42 3.0(8) . . . . ?
C40 C41 C42 C43 -1.8(7) . . . . ?
C41 C42 C43 C51 -0.8(7) . . . . ?
C41 C42 C43 C44 178.1(5) . . . . ?
C51 C43 C44 C45 0.2(7) . . . . ?
C42 C43 C44 C45 -178.6(4) . . . . ?
C43 C44 C45 C46 -0.5(7) . . . . ?
C44 C45 C46 C47 179.0(5) . . . . ?
C44 C45 C46 C50 -1.4(7) . . . . ?
C50 C46 C47 C48 -2.5(7) . . . . ?
C45 C46 C47 C48 177.1(5) . . . . ?
C46 C47 C48 C49 -0.4(7) . . . . ?
C50 N9 C49 C48 -3.5(7) . . . . ?
Zn N9 C49 C48 174.1(3) . . . . ?
C47 C48 C49 N9 3.6(7) . . . . ?
C49 N9 C50 C46 0.3(6) . . . . ?
Zn N9 C50 C46 -177.6(3) . . . . ?
C49 N9 C50 C51 179.7(4) . . . . ?
Zn N9 C50 C51 1.8(5) . . . . ?
C47 C46 C50 N9 2.7(6) . . . . ?
C45 C46 C50 N9 -177.0(4) . . . . ?
C47 C46 C50 C51 -176.7(4) . . . . ?
C45 C46 C50 C51 3.6(6) . . . . ?
C40 N8 C51 C43 -1.6(6) . . . . ?
Zn N8 C51 C43 -176.1(3) . . . . ?
C40 N8 C51 C50 -180.0(4) . . . . ?
Zn N8 C51 C50 5.5(5) . . . . ?
C42 C43 C51 N8 2.6(6) . . . . ?
C44 C43 C51 N8 -176.3(4) . . . . ?
C42 C43 C51 C50 -179.1(4) . . . . ?
C44 C43 C51 C50 2.1(6) . . . . ?
N9 C50 C51 N8 -5.0(6) . . . . ?
C46 C50 C51 N8 174.5(4) . . . . ?
N9 C50 C51 C43 176.6(4) . . . . ?
C46 C50 C51 C43 -4.0(6) . . . . ?
 
loop_
 _geom_hbond_atom_site_label_D 
 _geom_hbond_atom_site_label_H 
 _geom_hbond_atom_site_label_A 
 _geom_hbond_distance_DH 
 _geom_hbond_distance_HA 
 _geom_hbond_distance_DA 
 _geom_hbond_angle_DHA 
 _geom_hbond_site_symmetry_A 
 _geom_hbond_publ_flag
O10 H10A O4  0.84(3) 1.95(3) 2.759(5) 163(6) . yes
O10 H10B O1  0.75(6) 2.01(6) 2.760(5) 175(7) 8_655 yes
O11 H11A O14  0.85(7) 1.96(7) 2.786(6) 163(7) . yes
O11 H11B O2  0.94(7) 1.93(7) 2.862(5) 169(6) 8_655 yes
O12 H12A O11  0.98(7) 1.86(7) 2.831(6) 166(6) 3_655 yes
O12 H12B O13  0.82(7) 2.04(7) 2.840(6) 162(7) 8_765 yes
O13 H13A O6  0.87(3) 2.55(4) 3.394(6) 163(6) 4_556 yes
O13 H13B O2  0.99(7) 1.78(7) 2.773(5) 176(6) 8_655 yes
O13 H13B O3  0.99(7) 2.56(7) 3.202(5) 122(5) 8_655 yes
O14 H14C O10  0.89(3) 1.86(3) 2.734(5) 167(6) . yes
O14 H14D O8  0.86(3) 2.00(4) 2.769(5) 148(6) 5_566 yes
N1 H1 O7  0.87 2.23 3.010(5) 149.6 5_566 yes
N2 H2 O3  0.87 2.07 2.873(5) 153.4 5_566 yes
N3 H3 O5  0.87 1.93 2.753(5) 158.3 8_665 yes
O9 H9 O6  1.22(6) 1.35(6) 2.544(5) 165(5) 8_665 yes
C17 H17 O3  0.94 2.55 3.404(6) 151.6 8_655 yes
C29 H29 O3  0.94 2.46 3.183(6) 134.0 1_655 yes
C29 H29 O6  0.94 2.64 3.346(7) 132.4 5_666 yes
C37 H37 O11  0.94 2.49 3.144(6) 126.5 . yes
C40 H40 O10  0.94 2.55 3.253(6) 132.0 . yes
C40 H40 N4  0.94 2.67 3.221(6) 117.8 . yes
 
_refine_diff_density_max    0.280
_refine_diff_density_min   -0.579
_refine_diff_density_rms    0.064

_shelx_res_file
;
TITL Pbca
    D:\EXE\HB-ZnphenL8\Rechnung_16032023_4\HB-ZnphenL8.res
    created by SHELXL-2018/3 at 21:59:03 on 18-Mar-2023
CELL  0.71073   14.6426  20.0946  32.3448   90.000   90.000   90.000
ZERR     8.00    0.0007   0.0013   0.0023    0.000    0.000    0.000
LATT 1
SYMM -x+1/2,-y,z+1/2
SYMM -x,y+1/2,-z+1/2
SYMM x+1/2,-y+1/2,-z
SFAC  Zn O N C H
UNIT 8 112 72 408 376
TEMP -50
ACTA
DFIX 0.87 0.03 O10 H10A
DFIX 0.87 0.03 O13 H13A
DFIX 0.87 0.03 O14 H14C
DFIX 0.87 0.03 O14 H14D
WGHT    0.040000
FVAR       0.16830
MOLE 1
ZN    1    0.479616    0.485810    0.357600    11.00000    0.03688    0.03550 =
         0.03396    0.00046    0.00101    0.00043
O1    2    0.132427    0.670756    0.447697    11.00000    0.06322    0.03192 =
         0.04766    0.00421   -0.00218   -0.00746
O2    2   -0.011767    0.713682    0.337989    11.00000    0.05069    0.04877 =
         0.04523    0.01615    0.00343    0.01010
O3    2   -0.068940    0.663562    0.394128    11.00000    0.04401    0.05337 =
         0.03941    0.00316    0.00404   -0.00365
O4    2    0.191126    0.366399    0.461092    11.00000    0.08625    0.04031 =
         0.03156    0.00311    0.01317    0.01951
O5    2    0.243749    0.181858    0.562237    11.00000    0.06333    0.04027 =
         0.09672    0.02089   -0.02711    0.00107
O6    2    0.300526    0.281514    0.573219    11.00000    0.11358    0.04085 =
         0.09224   -0.00446   -0.06589    0.00389
O7    2    0.022375    0.535103    0.615357    11.00000    0.04736    0.03496 =
         0.04226   -0.00232    0.00792   -0.00856
O8    2   -0.036052    0.723070    0.661420    11.00000    0.05197    0.08048 =
         0.06605   -0.00481    0.01287    0.01009
O9    2    0.050596    0.765672    0.612541    11.00000    0.06569    0.04603 =
         0.07126    0.00787    0.01171    0.01529
H9    5    0.121287    0.764931    0.592695    11.00000   -1.50000
O10   2    0.267720    0.270814    0.410645    11.00000    0.07158    0.04591 =
         0.04358   -0.00200   -0.00259    0.01633
H10A  5    0.240774    0.293109    0.428782    11.00000   -1.50000
H10B  5    0.297286    0.245171    0.420743    11.00000   -1.50000
O11   2    0.353546    0.253424    0.292284    11.00000    0.05775    0.07547 =
         0.05756    0.01709   -0.00984   -0.01001
H11A  5    0.302534    0.248193    0.304448    11.00000   -1.50000
H11B  5    0.404421    0.245583    0.309341    11.00000   -1.50000
O12   2    0.658883    0.723641    0.293062    11.00000    0.06405    0.07796 =
         0.06653   -0.02490    0.01110   -0.00736
H12A  5    0.656044    0.741282    0.264712    11.00000   -1.50000
H12B  5    0.707446    0.738823    0.301758    11.00000   -1.50000
O13   2    0.687378    0.265243    0.339933    11.00000    0.05441    0.09954 =
         0.04998    0.02250    0.00237   -0.01919
H13A  5    0.712122    0.261495    0.364399    11.00000   -1.50000
H13B  5    0.623851    0.248035    0.340365    11.00000   -1.50000
O14   2    0.204116    0.213736    0.339541    11.00000    0.05804    0.08678 =
         0.05808   -0.01819   -0.00582    0.01023
H14C  5    0.216463    0.235326    0.362981    11.00000   -1.50000
H14D  5    0.158487    0.235779    0.329569    11.00000   -1.50000
N1    3    0.086832    0.587615    0.404788    11.00000    0.05507    0.03038 =
         0.03295    0.00659   -0.00144    0.00223
AFIX  43
H1    5    0.074735    0.545443    0.402127    11.00000   -1.20000
AFIX   0
N2    3    0.158789    0.337658    0.526914    11.00000    0.05415    0.02532 =
         0.03273    0.00138   -0.00050    0.00497
AFIX  43
H2    5    0.138593    0.350455    0.550928    11.00000   -1.20000
AFIX   0
N3    3    0.109544    0.626590    0.602889    11.00000    0.05124    0.02941 =
         0.03438   -0.00423    0.00908   -0.00821
AFIX  43
H3    5    0.145186    0.646303    0.585193    11.00000   -1.20000
AFIX   0
N4    3    0.483898    0.414251    0.407649    11.00000    0.04054    0.03456 =
         0.03567   -0.00147   -0.00078    0.00209
N5    3    0.436515    0.544227    0.409848    11.00000    0.03738    0.03179 =
         0.04439    0.00370   -0.00202    0.00255
N6    3    0.620026    0.517526    0.354470    11.00000    0.04426    0.03811 =
         0.03329   -0.00251   -0.00394   -0.00032
N7    3    0.537078    0.418981    0.312103    11.00000    0.03596    0.04073 =
         0.03475    0.00009   -0.00128   -0.00257
N8    3    0.336799    0.459897    0.345720    11.00000    0.04094    0.02900 =
         0.03233    0.00514    0.00038   -0.00451
N9    3    0.437854    0.559336    0.311769    11.00000    0.03657    0.03809 =
         0.03481   -0.00004    0.00340   -0.00438
C1    4    0.114818    0.563365    0.476907    11.00000    0.03417    0.02927 =
         0.03223    0.00382   -0.00081   -0.00365
C2    4    0.133404    0.496168    0.471099    11.00000    0.03214    0.03327 =
         0.03358    0.00221    0.00108    0.00157
AFIX  43
H2A   5    0.145118    0.480264    0.444288    11.00000   -1.20000
AFIX   0
C3    4    0.135009    0.451588    0.504544    11.00000    0.03136    0.02470 =
         0.03553    0.00147   -0.00183    0.00115
C4    4    0.113677    0.475914    0.543809    11.00000    0.03278    0.02908 =
         0.03284    0.00383   -0.00284   -0.00288
AFIX  43
H4    5    0.110580    0.446338    0.566281    11.00000   -1.20000
AFIX   0
C5    4    0.096922    0.543363    0.550159    11.00000    0.03357    0.03139 =
         0.02715    0.00074    0.00291   -0.00264
C6    4    0.098949    0.587371    0.516678    11.00000    0.03490    0.02728 =
         0.03854    0.00271    0.00248   -0.00232
AFIX  43
H6    5    0.089612    0.633126    0.521002    11.00000   -1.20000
AFIX   0
C7    4    0.112518    0.611511    0.441687    11.00000    0.03830    0.03507 =
         0.03517    0.00425    0.00485    0.00364
C8    4    0.078939    0.631421    0.369099    11.00000    0.05226    0.03601 =
         0.02989    0.00756    0.00291    0.00859
AFIX  23
H8C   5    0.082539    0.604353    0.343949    11.00000   -1.20000
H8D   5    0.131225    0.661864    0.368988    11.00000   -1.20000
AFIX   0
C9    4   -0.008238    0.672358    0.367546    11.00000    0.04634    0.03445 =
         0.03273   -0.00358   -0.00881   -0.00093
C10   4    0.162387    0.382124    0.495937    11.00000    0.03919    0.02882 =
         0.03426    0.00351   -0.00424    0.00424
C11   4    0.187303    0.269299    0.521734    11.00000    0.05338    0.02594 =
         0.03653   -0.00020   -0.00201    0.00533
AFIX  23
H11C  5    0.219140    0.265300    0.495199    11.00000   -1.20000
H11D  5    0.132674    0.241215    0.520335    11.00000   -1.20000
AFIX   0
C12   4    0.248629    0.242799    0.555167    11.00000    0.04326    0.03105 =
         0.04111   -0.00333   -0.00331    0.00713
C13   4    0.072875    0.567688    0.592504    11.00000    0.03578    0.02380 =
         0.03533    0.00049    0.00062   -0.00086
C14   4    0.092449    0.658998    0.642365    11.00000    0.04988    0.03245 =
         0.03493   -0.00646    0.00151   -0.00174
AFIX  23
H14A  5    0.150864    0.673161    0.654250    11.00000   -1.20000
H14B  5    0.064992    0.626689    0.661354    11.00000   -1.20000
AFIX   0
C15   4    0.030422    0.718524    0.639003    11.00000    0.04637    0.04317 =
         0.04387   -0.00292    0.00099   -0.00412
C16   4    0.505089    0.350244    0.405939    11.00000    0.05001    0.03865 =
         0.04297   -0.00285   -0.00200    0.00475
AFIX  43
H16   5    0.533767    0.334113    0.381947    11.00000   -1.20000
AFIX   0
C17   4    0.487196    0.305855    0.437654    11.00000    0.05842    0.03041 =
         0.05589   -0.00163   -0.00839    0.00483
AFIX  43
H17   5    0.503276    0.260757    0.435079    11.00000   -1.20000
AFIX   0
C18   4    0.445815    0.328646    0.472732    11.00000    0.04503    0.04188 =
         0.04956    0.00914   -0.00855   -0.00500
AFIX  43
H18   5    0.432382    0.298869    0.494305    11.00000   -1.20000
AFIX   0
C19   4    0.423269    0.395942    0.476809    11.00000    0.03579    0.04444 =
         0.03340    0.00054   -0.00383   -0.00277
C20   4    0.380441    0.424023    0.512255    11.00000    0.04289    0.05541 =
         0.03458    0.00227   -0.00084   -0.00874
AFIX  43
H20   5    0.366825    0.396474    0.534920    11.00000   -1.20000
AFIX   0
C21   4    0.358926    0.489243    0.514095    11.00000    0.03235    0.05737 =
         0.03777   -0.00145    0.00166   -0.00255
AFIX  43
H21   5    0.331871    0.506476    0.538177    11.00000   -1.20000
AFIX   0
C22   4    0.376865    0.532968    0.479593    11.00000    0.03359    0.04343 =
         0.03285   -0.00635    0.00172    0.00027
C23   4    0.353697    0.600865    0.479199    11.00000    0.04014    0.04683 =
         0.05077   -0.01367    0.00556    0.00525
AFIX  43
H23   5    0.325118    0.620246    0.502269    11.00000   -1.20000
AFIX   0
C24   4    0.373000    0.638716    0.444977    11.00000    0.05702    0.04412 =
         0.05252   -0.01132    0.00083    0.01221
AFIX  43
H24   5    0.359084    0.684377    0.444546    11.00000   -1.20000
AFIX   0
C25   4    0.413685    0.608250    0.410786    11.00000    0.05250    0.03236 =
         0.04413    0.00213   -0.00018    0.00272
AFIX  43
H25   5    0.425508    0.634335    0.387263    11.00000   -1.20000
AFIX   0
C26   4    0.418939    0.506409    0.444014    11.00000    0.02725    0.03694 =
         0.03392   -0.00298   -0.00378    0.00017
C27   4    0.443211    0.437511    0.442867    11.00000    0.03390    0.03588 =
         0.02996   -0.00093   -0.00342   -0.00177
C28   4    0.658957    0.568684    0.373526    11.00000    0.04675    0.04713 =
         0.03743   -0.00366   -0.00371   -0.00655
AFIX  43
H28   5    0.622799    0.594751    0.391258    11.00000   -1.20000
AFIX   0
C29   4    0.750236    0.585779    0.368683    11.00000    0.04634    0.05508 =
         0.04642    0.00065   -0.01354   -0.00435
AFIX  43
H29   5    0.774937    0.622641    0.382651    11.00000   -1.20000
AFIX   0
C30   4    0.803835    0.547490    0.342932    11.00000    0.03824    0.05649 =
         0.05149    0.01219   -0.00862   -0.01048
AFIX  43
H30   5    0.866182    0.557481    0.339862    11.00000   -1.20000
AFIX   0
C31   4    0.765672    0.493525    0.321222    11.00000    0.04000    0.04231 =
         0.03737    0.01020   -0.00515    0.00720
C32   4    0.814415    0.453367    0.291878    11.00000    0.03722    0.05320 =
         0.05279    0.01115    0.00394    0.00828
AFIX  43
H32   5    0.876959    0.461176    0.287476    11.00000   -1.20000
AFIX   0
C33   4    0.772135    0.404633    0.270503    11.00000    0.04962    0.04914 =
         0.04759    0.00707    0.01303    0.01092
AFIX  43
H33   5    0.806034    0.379032    0.251631    11.00000   -1.20000
AFIX   0
C34   4    0.676819    0.390938    0.275860    11.00000    0.04685    0.03914 =
         0.03725    0.00936    0.00189    0.00615
C35   4    0.628110    0.343694    0.252645    11.00000    0.07341    0.03653 =
         0.03903   -0.00172    0.00623    0.00668
AFIX  43
H35   5    0.658221    0.318072    0.232511    11.00000   -1.20000
AFIX   0
C36   4    0.537059    0.335186    0.259447    11.00000    0.06612    0.03845 =
         0.04287   -0.00621   -0.00394   -0.00251
AFIX  43
H36   5    0.503702    0.304572    0.243484    11.00000   -1.20000
AFIX   0
C37   4    0.493804    0.371840    0.289992    11.00000    0.04935    0.03559 =
         0.04165   -0.00245   -0.00111   -0.01334
AFIX  43
H37   5    0.431824    0.363447    0.295480    11.00000   -1.20000
AFIX   0
C38   4    0.627921    0.428567    0.305126    11.00000    0.04160    0.03562 =
         0.02915    0.00254    0.00276    0.00469
C39   4    0.671754    0.480721    0.328048    11.00000    0.04132    0.03602 =
         0.03190    0.00441    0.00126    0.00246
C40   4    0.286779    0.413052    0.363421    11.00000    0.04733    0.04165 =
         0.04497    0.00974   -0.00509   -0.00477
AFIX  43
H40   5    0.316117    0.383127    0.381381    11.00000   -1.20000
AFIX   0
C41   4    0.192738    0.405333    0.357023    11.00000    0.04125    0.04896 =
         0.05213    0.00543    0.00741   -0.01163
AFIX  43
H41   5    0.159572    0.372538    0.371308    11.00000   -1.20000
AFIX   0
C42   4    0.150344    0.446815    0.329409    11.00000    0.03699    0.05066 =
         0.04079   -0.00541    0.00097   -0.00111
AFIX  43
H42   5    0.087662    0.441921    0.323921    11.00000   -1.20000
AFIX   0
C43   4    0.201514    0.497298    0.309080    11.00000    0.03349    0.03475 =
         0.04114   -0.00452    0.00109   -0.00015
C44   4    0.162705    0.540823    0.279151    11.00000    0.03464    0.04686 =
         0.04390   -0.00873   -0.00632    0.00927
AFIX  43
H44   5    0.100329    0.537221    0.272653    11.00000   -1.20000
AFIX   0
C45   4    0.214504    0.587509    0.259832    11.00000    0.04803    0.03798 =
         0.03777   -0.00066   -0.00408    0.00870
AFIX  43
H45   5    0.187537    0.615478    0.239992    11.00000   -1.20000
AFIX   0
C46   4    0.309157    0.594733    0.269192    11.00000    0.04539    0.02819 =
         0.03723    0.00327    0.00030    0.00467
C47   4    0.366230    0.641118    0.249934    11.00000    0.06409    0.03358 =
         0.03741    0.00236   -0.00113    0.00638
AFIX  43
H47   5    0.343258    0.668326    0.228704    11.00000   -1.20000
AFIX   0
C48   4    0.455395    0.646957    0.261937    11.00000    0.05845    0.03694 =
         0.04530    0.00858    0.00966   -0.00347
AFIX  43
H48   5    0.494098    0.677878    0.248953    11.00000   -1.20000
AFIX   0
C49   4    0.488318    0.606484    0.293693    11.00000    0.04338    0.03738 =
         0.04130    0.00491    0.00461   -0.00435
AFIX  43
H49   5    0.548708    0.612679    0.302768    11.00000   -1.20000
AFIX   0
C50   4    0.348226    0.553397    0.299671    11.00000    0.03600    0.03284 =
         0.02995   -0.00496    0.00374    0.00260
C51   4    0.294144    0.502355    0.319032    11.00000    0.03389    0.03271 =
         0.03366   -0.00145    0.00380    0.00493
MOLE 2
L.S. 12
BOND $H
CONF
HTAB
EQIV $1 -x+1/2, y-1/2, z
HTAB O10 O4
HTAB O10 O1_$1
HTAB O11 O14
HTAB O11 O2_$1
EQIV $2 -x+1, y+1/2, -z+1/2
HTAB O12 O11_$2
EQIV $3 -x+3/2, y+1/2, z
HTAB O12 O13_$3
EQIV $4 x+1/2, -y+1/2, -z+1
HTAB O13 O6_$4
HTAB O13 O2_$1
HTAB O13 O3_$1
HTAB O14 O10
EQIV $5 -x, -y+1, -z+1
HTAB O14 O8_$5
HTAB N1 O7_$5
HTAB N2 O3_$5
EQIV $6 -x+1/2, y+1/2, z
HTAB N3 O5_$6
HTAB O9 O6_$6
HTAB C17 O3_$1
EQIV $7 x+1, y, z
HTAB C29 O3_$7
EQIV $8 -x+1, -y+1, -z+1
HTAB C29 O6_$8
HTAB C37 O11
HTAB C40 O10
HTAB C40 N4
FMAP 2
PLAN -5
HKLF 4


REM  Pbca
REM wR2 = 0.1162, GooF = S = 0.908, Restrained GooF = 0.908 for all data
REM R1 = 0.0536 for 4396 Fo > 4sig(Fo) and 0.1277 for all 8439 data
REM 709 parameters refined using 4 restraints

END

WGHT      0.0399      0.0000

REM Instructions for potential hydrogen bonds
HTAB O9 O6_$6
HTAB O10 O4
HTAB O10 O1_$1
HTAB O11 O14
HTAB O11 O2_$1
HTAB O12 O11_$2
HTAB O12 O13_$3
HTAB O13 O6_$4
HTAB O13 O2_$1
HTAB O13 O3_$1
HTAB O14 O10
HTAB O14 O8_$5
HTAB N1 O7_$5
HTAB N2 O3_$5
HTAB N3 O5_$6
HTAB C17 O3_$1
HTAB C29 O3_$7
HTAB C29 O6_$8
HTAB C37 O11
HTAB C40 O10
HTAB C40 N4

REM Highest difference peak  0.280,  deepest hole -0.579,  1-sigma level  0.064
Q1    1   0.4394  0.4207  0.3383  11.00000  0.05    0.28
Q2    1   0.5182  0.4212  0.3411  11.00000  0.05    0.27
Q3    1   0.2763  0.6599  0.3783  11.00000  0.05    0.26
Q4    1   0.5312  0.5404  0.3459  11.00000  0.05    0.25
Q5    1   0.5361  0.4628  0.3174  11.00000  0.05    0.25
;
_shelx_res_checksum   39030

_shelx_hkl_file
;
   2   0   0 1144.95   37.68   0
  -2   0   0 1141.09   38.16   0
  -4   0   0  358.61   20.81   0
  -6   0   0 2769.72   34.77   0
  -8   0   0  310.10   15.74   0
 -10   0   0   11.08   11.71   0
 -12   0   0   -3.16   11.50   0
 -14   0   0    2.21   11.60   0
 -16   0   0   11.91   11.31   0
  -2   1   0    7.63   19.07   0
  -2  -1   0    6.28   17.48   0
   2  -1   0    7.94   25.83   0
   4  -1   0 1046.67   34.38   0
  -4  -1   0 1015.65   30.15   0
  -4   1   0 1003.83   30.14   0
  -6  -1   0  293.63   16.76   0
  -6   1   0  314.86   17.95   0
  -8  -1   0  226.09   14.78   0
  -8   1   0  230.41   15.15   0
 -10  -1   0    9.08   11.20   0
 -10   1   0   12.25   17.39   0
 -12   1   0   22.43   17.06   0
 -12  -1   0    6.44   11.44   0
 -14  -1   0   47.58   11.75   0
 -14   1   0   38.63   12.02   0
 -16   1   0   -1.76   11.73   0
 -16  -1   0   -3.13   11.56   0
   2  -2   0  829.40   50.76   0
  -4   2   0 2215.04   48.58   0
  -4  -2   0 2104.42   31.73   0
   4  -2   0 2110.72   45.49   0
  -6   2   0   44.52   15.33   0
  -6  -2   0   36.21   14.33   0
  -8  -2   0  146.49   13.95   0
  -8   2   0  164.69   20.10   0
 -10  -2   0  102.50   12.62   0
 -10   2   0  117.29   13.09   0
 -12   2   0   12.15   12.47   0
 -12  -2   0   12.71   11.96   0
 -14  -2   0    3.31   11.35   0
 -14   2   0    8.13   11.57   0
 -16   2   0   16.00   11.61   0
 -16  -2   0   15.01   11.28   0
   4  -3   0  618.84   29.57   0
  -4  -3   0  820.58   22.73   0
  -4   3   0  805.18   34.71   0
  -6   3   0  119.19   22.02   0
  -6  -3   0  131.09   14.99   0
  -8   3   0  722.40   24.83   0
  -8  -3   0  728.08   17.68   0
 -10  -3   0   41.62   11.15   0
 -10   3   0   39.72   12.32   0
 -12   3   0  325.97   19.48   0
 -12  -3   0  306.47   14.63   0
 -14  -3   0   58.82   11.56   0
 -14   3   0   71.59   12.91   0
 -16  -3   0   -1.70   11.43   0
 -16   3   0   -0.23   12.06   0
  -4  -4   0 1467.19   25.34   0
   4  -4   0 1457.43   49.21   0
  -6   4   0 1080.06   33.99   0
   6  -4   0  945.37   30.88   0
  -6  -4   0 1077.47   21.67   0
  -8   4   0   69.41   14.38   0
  -8  -4   0   70.26   13.19   0
 -10   4   0   21.19   12.47   0
 -10  -4   0   27.79   11.56   0
 -12  -4   0   56.74   11.64   0
 -12   4   0   53.22   13.65   0
 -14  -4   0    5.00   11.96   0
 -14   4   0    6.50   11.84   0
 -16   4   0    3.29   12.56   0
 -16  -4   0    8.54   11.12   0
   4  -5   0    0.41   20.58   0
  -4  -5   0   10.59   13.26   0
  -6  -5   0  219.97   15.78   0
   6  -5   0  248.04   26.80   0
  -6   5   0  230.90   23.46   0
  -8   5   0  435.34   22.15   0
  -8  -5   0  458.64   15.45   0
 -10   5   0   86.46   13.81   0
 -10  -5   0   89.43   12.39   0
 -12  -5   0   25.62   11.56   0
 -12   5   0   23.90   13.01   0
 -14  -5   0  197.69   13.08   0
 -14   5   0  161.91   16.40   0
 -16   5   0    1.36   12.21   0
 -16  -5   0    2.71   11.71   0
   4  -6   0   38.61   16.73   0
  -4  -6   0   36.75   13.96   0
  -6  -6   0  355.38   15.93   0
   6  -6   0  375.36   32.37   0
  -8  -6   0  518.92   15.20   0
 -10   6   0    4.47   12.62   0
 -10  -6   0   11.01   12.00   0
 -12   6   0    3.06   12.43   0
 -12  -6   0    5.08   10.92   0
 -14  -6   0    9.33   10.78   0
 -14   6   0    2.43   12.37   0
 -16   6   0    1.94   12.71   0
 -16  -6   0   -7.38   10.76   0
  -4  -7   0  266.84   16.72   0
  -6  -7   0  231.61   14.36   0
  -8  -7   0  517.76   15.93   0
 -10  -7   0    7.79   12.26   0
 -14  -7   0   29.05   11.76   0
 -16  -7   0   28.71   12.27   0
  -4  -8   0  159.78   15.67   0
  -6  -8   0  252.24   13.73   0
  -8  -8   0   43.42   12.90   0
 -10  -8   0  159.06   12.63   0
 -12  -8   0    7.00   10.32   0
 -14  -8   0   -6.89   11.44   0
 -16  -8   0    6.99   11.77   0
  -4  -9   0  127.98   14.34   0
   6  -9   0  113.42   23.80   0
  -6  -9   0  137.83   12.34   0
   6  -9   0   50.09   16.36   0
  -8  -9   0  424.09   15.05   0
 -10  -9   0   92.86   12.40   0
 -12  -9   0   78.55   12.09   0
 -14  -9   0  101.55   12.10   0
 -16  -9   0   -0.15   12.71   0
  -4 -10   0 1603.76   21.54   0
  -6 -10   0    9.20   11.67   0
   6 -10   0    7.48   17.95   0
   6 -10   0    5.58   17.62   0
  -8 -10   0   67.53   12.11   0
 -10 -10   0  430.44   14.59   0
 -12 -10   0  -11.40   11.54   0
 -14 -10   0  -10.28   11.35   0
  -2 -11   0    2.87   12.59   0
  -4 -11   0  264.06   14.20   0
   6 -11   0  154.56   17.27   0
  -6 -11   0  166.70   13.44   0
   6 -11   0  168.32   22.87   0
  -8 -11   0  270.89   13.29   0
 -10 -11   0  291.60   13.57   0
 -12 -11   0   42.99   11.58   0
 -14 -11   0   43.88   13.06   0
  -2 -12   0   12.94   16.75   0
   4 -12   0  194.42   16.17   0
  -4 -12   0  215.64   13.59   0
  -6 -12   0  131.57   12.62   0
   6 -12   0  102.67   20.48   0
   6 -12   0  102.58   15.25   0
  -8 -12   0   90.80   12.11   0
 -10 -12   0    8.22   11.26   0
 -14 -12   0    3.97   11.50   0
   2 -13   0  117.24   13.82   0
  -2 -13   0   88.39   12.62   0
  -4 -13   0  120.14   13.23   0
   4 -13   0  112.76   13.23   0
   6 -13   0   24.37   13.21   0
  -6 -13   0   23.49   11.90   0
  -8 -13   0  171.32   12.44   0
 -10 -13   0  431.17   13.64   0
 -14 -13   0   11.43   17.24   0
   0 -14   0   71.04   12.25   0
  -2 -14   0   43.72   12.22   0
   2 -14   0   57.34   12.92   0
   4 -14   0   66.87   12.55   0
  -4 -14   0   56.14   12.20   0
  -6 -14   0  -10.43   11.41   0
   6 -14   0   -0.50   17.96   0
  -8 -14   0   -1.15   11.43   0
 -10 -14   0    7.69   10.97   0
 -12 -14   0   82.59   12.19   0
 -14 -14   0   -4.57   17.17   0
  -2 -15   0   28.48   11.43   0
   2 -15   0   20.29   12.32   0
  -4 -15   0   -7.02   12.37   0
   4 -15   0    4.03   12.05   0
   6 -15   0  102.83   14.70   0
  -6 -15   0  131.24   12.11   0
  -8 -15   0   21.97   10.68   0
 -10 -15   0   74.11   11.37   0
 -12 -15   0   19.02   11.91   0
   0 -16   0  104.05   12.64   0
  -2 -16   0   15.90   12.00   0
   2 -16   0   12.32   11.87   0
   4 -16   0   11.98   12.26   0
  -4 -16   0   18.49   11.34   0
  -6 -16   0   23.01   11.99   0
   6 -16   0   11.46   12.06   0
  -8 -16   0    9.20   10.77   0
 -12 -16   0   11.45   11.44   0
   2 -17   0   80.85   17.20   0
  -2 -17   0   85.70   12.10   0
  -4 -17   0  139.11   13.02   0
   4 -17   0  158.67   14.46   0
   6 -17   0   50.77   12.93   0
  -6 -17   0   46.71   12.41   0
  -8 -17   0  113.99   12.52   0
   0 -18   0  190.12   12.92   0
  -2 -18   0    0.71   11.30   0
   2 -18   0  -14.35   11.30   0
   4 -18   0   13.94   12.42   0
  -4 -18   0   18.84   12.33   0
   6 -18   0    6.38   12.35   0
 -10 -18   0   37.10   11.36   0
  -2 -19   0   27.88   11.66   0
   2 -19   0   28.74   11.90   0
   4 -19   0   59.45   12.76   0
  -4 -19   0   42.44   12.12   0
   6 -19   0    3.86   12.01   0
  -6 -19   0   20.69   11.00   0
  -8 -19   0   59.85   12.55   0
   0 -20   0    5.68   11.42   0
   2 -20   0   23.61   12.61   0
  -2 -20   0   54.41   11.66   0
  -4 -20   0   -2.79   11.30   0
   4 -20   0   10.11   11.21   0
   6 -20   0    1.89   11.82   0
  -2 -21   0   39.31   11.72   0
   2 -21   0   37.86   11.47   0
  -4 -21   0   20.79   11.57   0
   4 -21   0    9.13   12.61   0
  -6 -21   0   18.41   12.13   0
   6 -21   0    5.78   12.81   0
  -8 -21   0   26.66   12.11   0
   0 -22   0   34.43   12.22   0
   2 -22   0  107.81   12.94   0
  -2 -22   0   81.92   13.10   0
  -4 -22   0   13.11   11.16   0
   4 -22   0    3.80   12.24   0
   6 -22   0   -0.40   12.82   0
   2 -23   0   -4.19   17.04   0
  -2 -23   0    0.73   11.68   0
   4 -23   0   17.96   12.26   0
   1   1  -1  655.31   28.30   0
  -1  -1   1  649.65   29.64   0
  -1   1   1  651.36   39.25   0
   1  -1  -1  554.57   35.24   0
   2   1  -1  180.70   21.17   0
  -2  -1   1  188.59   21.30   0
   2  -1  -1  123.34   22.11   0
  -2   1   1  189.97   24.23   0
  -3  -1   1 1715.85   36.15   0
   3   1  -1 1729.74   35.81   0
  -3   1   1 1775.67   42.14   0
   3  -1  -1 1743.82   41.37   0
  -3   1  -1 1694.73   44.33   0
  -4  -1   1  963.25   25.76   0
  -4   1  -1 1002.27   33.63   0
  -4  -1  -1  949.82   25.61   0
   4  -1  -1  981.12   29.15   0
   4   1  -1  987.91   25.49   0
  -4   1   1  972.06   28.79   0
  -5   1  -1  827.79   25.50   0
  -5  -1  -1  837.01   22.18   0
  -5   1   1  855.95   24.65   0
  -5  -1   1  829.01   21.91   0
   5  -1  -1  833.42   25.00   0
   5   1  -1  857.86   22.20   0
   6  -1  -1 1568.88   28.52   0
  -6  -1  -1 1506.14   29.01   0
  -6  -1   1 1489.60   26.68   0
  -6   1  -1 1419.35   27.81   0
  -6   1   1 1510.50   28.48   0
  -7   1   1  121.64   16.33   0
  -7  -1  -1  114.74   15.95   0
  -7   1  -1  122.32   15.08   0
  -7  -1   1  120.51   15.76   0
  -8   1  -1   45.04   12.41   0
  -8   1   1   37.87   12.95   0
  -8  -1  -1   32.39   12.67   0
  -8  -1   1   52.50   18.49   0
  -9   1  -1   51.96   17.40   0
  -9  -1  -1   36.14   11.98   0
  -9   1   1   37.85   12.06   0
  -9  -1   1   47.89   16.72   0
 -10   1   1  209.55   14.46   0
 -10  -1   1  219.54   18.16   0
 -10   1  -1  209.97   14.18   0
 -10  -1  -1  212.29   14.12   0
 -11   1   1   30.62   12.54   0
 -11   1  -1   29.09   12.89   0
 -11  -1   1   14.65   11.55   0
 -11  -1  -1   35.06   12.53   0
 -12  -1   1  114.53   17.27   0
 -12  -1  -1  101.93   12.52   0
 -12   1   1   98.49   13.23   0
 -12   1  -1   95.95   12.80   0
 -13   1  -1   26.33   12.23   0
 -13  -1   1   32.24   11.50   0
 -13   1   1   27.14   11.21   0
 -13  -1  -1   28.91   12.05   0
 -14  -1  -1  141.13   16.74   0
 -14  -1   1   96.30   12.63   0
 -14   1   1  122.29   13.19   0
 -14   1  -1  129.61   12.73   0
 -15  -1   1   10.50   11.05   0
 -15   1  -1   -4.11   11.09   0
 -15   1   1    4.99   11.71   0
 -15  -1  -1   -0.48   11.90   0
 -16  -1  -1   62.33   12.95   0
 -16   1   1   66.73   13.41   0
 -16   1  -1   67.65   12.64   0
 -16  -1   1   67.02   12.51   0
 -17  -1   1    8.85   11.76   0
 -17  -1  -1    1.34   11.82   0
 -17   1   1    2.45   16.98   0
 -17   1  -1    7.09   11.94   0
   0  -2   1   32.58   15.97   0
   0   2  -1   35.42   20.87   0
   1   2  -1    7.82   15.52   0
  -1  -2   1    8.64   15.42   0
  -2  -2   1   28.80   18.89   0
   2   2  -1   39.33   17.08   0
  -2   2   1   39.84   23.77   0
   2  -2  -1   28.45   21.51   0
   3   2  -1 1382.40   29.94   0
  -3   2  -1 1381.61   50.60   0
   3  -2  -1  823.75   33.01   0
  -3   2   1 1424.22   42.75   0
  -3  -2   1 1400.55   30.24   0
  -4  -2   1  444.47   19.29   0
  -4   2  -1  441.53   26.10   0
   4  -2  -1  339.15   22.22   0
  -4  -2  -1  418.71   19.38   0
  -4   2   1  471.55   29.89   0
   5  -2  -1    1.58   14.54   0
  -5   2  -1    4.36   14.69   0
  -5  -2  -1   11.42   13.66   0
  -5  -2   1    1.73   13.29   0
  -5   2   1    8.27   14.67   0
  -6  -2  -1  163.84   15.24   0
  -6   2  -1  181.16   16.81   0
  -6   2   1  170.38   16.98   0
  -6  -2   1  169.90   16.19   0
   6  -2  -1  170.80   16.60   0
   7  -2  -1 1316.74   27.58   0
  -7  -2   1 1334.73   23.13   0
  -7   2   1 1381.28   27.75   0
  -7  -2  -1 1368.53   24.44   0
  -7   2  -1 1303.52   27.75   0
  -8  -2   1   31.19   13.45   0
  -8   2  -1   28.39   13.35   0
  -8   2   1   32.52   13.59   0
  -8  -2  -1   45.57   13.05   0
  -9   2   1    8.93   11.73   0
  -9  -2  -1   14.61   11.66   0
  -9  -2   1   10.93   12.29   0
  -9   2  -1   13.90   11.33   0
 -10  -2  -1   13.08   11.75   0
 -10  -2   1   12.65   11.05   0
 -10   2  -1    6.76   11.99   0
 -10   2   1   21.44   12.18   0
 -11   2   1   16.77   12.43   0
 -11  -2  -1   19.34   10.62   0
 -11   2  -1   19.06   11.06   0
 -11  -2   1   19.66   11.42   0
 -12  -2   1    9.28   11.48   0
 -12  -2  -1   -2.32   11.42   0
 -12   2   1    9.52   11.53   0
 -12   2  -1    5.40   11.83   0
 -13  -2   1    7.30   10.82   0
 -13   2  -1    6.68   16.86   0
 -13   2   1   10.75   12.01   0
 -13  -2  -1   10.38   11.71   0
 -14   2   1   32.53   11.81   0
 -14  -2   1   36.37   16.94   0
 -14  -2  -1   38.76   11.50   0
 -14   2  -1   33.88   11.68   0
 -15   2   1    5.52   11.24   0
 -15  -2   1    2.90   11.77   0
 -15  -2  -1    9.50   11.44   0
 -15   2  -1   17.62   11.64   0
 -16  -2   1   15.14   11.72   0
 -16  -2  -1   10.73   11.75   0
 -16   2  -1    7.00   12.05   0
 -16   2   1    5.97   11.87   0
 -17   2  -1    8.92   12.42   0
 -17  -2   1   -2.80   12.14   0
 -17   2   1   14.92   17.66   0
 -17  -2  -1   -2.30   11.87   0
   1  -3   1 1315.43   46.90   0
  -1  -3   1 1310.76   33.32   0
  -2  -3   1   22.16   16.78   0
   3  -3  -1   11.30   17.96   0
  -3  -3   1    7.34   15.28   0
  -3   3   1   13.71   19.12   0
  -4   3   1   50.76   24.17   0
  -4  -3   1   34.37   14.48   0
  -4   3  -1   46.36   17.46   0
   4  -3  -1   38.18   15.90   0
  -5   3   1   10.62   20.91   0
  -5  -3   1   -9.42   13.39   0
   5  -3  -1    1.22   14.15   0
  -5   3  -1    5.83   14.02   0
  -5  -3  -1   -4.44   13.27   0
  -6   3   1  580.26   22.63   0
   6  -3  -1  604.17   22.80   0
  -6  -3   1  615.99   19.02   0
  -6  -3  -1  633.89   23.94   0
  -6   3  -1  589.80   23.88   0
   7  -3  -1  147.72   16.05   0
  -7   3  -1  146.02   21.41   0
  -7  -3   1  140.78   15.09   0
  -7  -3  -1  125.99   14.75   0
  -7   3   1  136.79   16.68   0
  -8  -3  -1  202.52   14.21   0
  -8   3  -1  207.71   15.65   0
  -8  -3   1  211.70   14.60   0
  -8   3   1  203.71   15.64   0
  -9  -3  -1   52.74   11.53   0
  -9   3  -1   53.80   16.90   0
  -9  -3   1   33.66   12.30   0
  -9   3   1   46.03   12.51   0
 -10  -3  -1  110.53   12.22   0
 -10   3  -1  104.23   13.34   0
 -10  -3   1   95.96   12.33   0
 -10   3   1  106.95   13.88   0
 -11   3   1   22.80   12.72   0
 -11  -3  -1    2.91   11.66   0
 -11   3  -1   19.07   11.43   0
 -11  -3   1   28.15   10.74   0
 -12  -3   1   88.06   12.18   0
 -12   3   1   83.63   13.66   0
 -12  -3  -1   79.62   11.65   0
 -12   3  -1   94.34   13.26   0
 -13   3   1    1.38   11.75   0
 -13   3  -1    1.26   11.83   0
 -13  -3   1   15.20   11.93   0
 -13  -3  -1   -2.65   12.36   0
 -14  -3  -1   39.77   11.12   0
 -14   3   1   52.90   17.62   0
 -14  -3   1   39.23   11.21   0
 -14   3  -1   38.11   12.31   0
 -15  -3   1    7.19   10.87   0
 -15  -3  -1    4.68   10.61   0
 -15   3  -1   -0.86   12.47   0
 -15   3   1    0.14   12.12   0
 -16   3   1    8.35   12.24   0
 -16   3  -1    6.47   11.59   0
 -16  -3  -1   11.51   11.05   0
 -16  -3   1   17.40   11.28   0
 -17  -3  -1    4.22   11.87   0
 -17   3  -1    5.73   12.48   0
 -17   3   1   -1.79   12.47   0
 -17  -3   1    5.33   11.73   0
   0  -4   1  278.57   23.49   0
  -1  -4   1   12.17   16.68   0
  -2  -4   1  109.56   15.85   0
   3  -4  -1  990.03   38.33   0
  -3  -4   1 1021.63   23.84   0
   4  -4  -1   68.27   17.30   0
  -4  -4   1   96.84   14.69   0
  -5  -4  -1  317.62   17.11   0
  -5   4   1  313.95   22.64   0
  -5  -4   1  312.61   16.34   0
  -5   4  -1  286.97   25.05   0
   5  -4  -1  278.18   20.38   0
  -6  -4   1  496.44   18.40   0
   6  -4  -1  450.49   22.42   0
  -6  -4  -1  488.56   17.97   0
  -6   4  -1  406.66   24.38   0
  -6   4   1  473.01   23.79   0
   7  -4  -1   44.64   14.46   0
  -7  -4  -1   40.35   14.12   0
  -7  -4   1   42.26   13.94   0
  -7   4  -1   43.19   15.08   0
  -7   4   1   49.02   21.64   0
  -8   4  -1    7.72   13.80   0
  -8   4   1    5.74   13.54   0
  -8  -4   1    2.03   12.24   0
  -8  -4  -1   12.96   12.46   0
  -9   4  -1  253.96   17.08   0
  -9   4   1  244.63   15.78   0
  -9  -4  -1  263.21   13.30   0
  -9  -4   1  250.94   13.27   0
 -10  -4  -1    3.64   11.85   0
 -10  -4   1   28.45   11.30   0
 -10   4   1   19.70   12.48   0
 -10   4  -1   25.91   12.70   0
 -11   4   1   27.52   12.24   0
 -11  -4  -1   22.06   11.61   0
 -11  -4   1   22.69   11.15   0
 -11   4  -1   16.25   13.06   0
 -12  -4  -1   -0.15   11.75   0
 -12   4  -1    7.50   16.96   0
 -12  -4   1  -10.33   11.22   0
 -12   4   1    3.07   13.01   0
 -13  -4   1    0.81   16.48   0
 -13   4   1   -7.66   12.74   0
 -13   4  -1    3.71   12.04   0
 -13  -4  -1   18.79   11.88   0
 -14  -4  -1   -7.70   11.81   0
 -14   4   1    2.31   11.83   0
 -14  -4   1    8.62   11.53   0
 -14   4  -1    9.81   16.54   0
 -15  -4  -1    5.74   11.42   0
 -15  -4   1   -9.90   10.52   0
 -15   4   1    2.18   17.60   0
 -15   4  -1    5.97   12.25   0
 -16   4  -1    7.02   12.06   0
 -16  -4  -1   13.43   11.27   0
 -16   4   1   -3.65   17.40   0
 -16  -4   1    4.22   11.48   0
 -17  -4   1    9.78   11.76   0
 -17  -4  -1   11.88   11.50   0
 -17   4   1   -3.22   12.70   0
 -17   4  -1    2.74   13.42   0
  -1  -5   1  171.58   17.68   0
  -2  -5   1    3.41   14.61   0
  -3  -5   1   47.81   14.57   0
  -4  -5   1  151.99   15.20   0
   4  -5  -1  157.64   19.98   0
   5  -5  -1   79.04   21.01   0
  -5  -5   1   88.78   14.70   0
  -5  -5  -1   79.04   15.03   0
  -6  -5  -1  203.64   15.12   0
  -6  -5   1  338.98   16.36   0
  -6   5   1  339.35   24.95   0
   6  -5  -1  336.01   22.70   0
  -7  -5  -1  115.62   14.74   0
  -7  -5   1  103.43   14.29   0
   7  -5  -1  115.18   15.87   0
  -7   5  -1  127.63   24.41   0
  -7   5   1  111.14   17.02   0
  -8   5  -1   73.65   15.69   0
  -8  -5   1   66.05   13.23   0
  -8  -5  -1   66.40   11.90   0
  -8   5   1   64.66   15.22   0
  -9   5  -1   27.12   18.63   0
  -9  -5  -1   31.31   11.48   0
  -9  -5   1   35.31   11.69   0
  -9   5   1   22.34   13.09   0
 -10  -5  -1  158.26   12.59   0
 -10   5  -1  143.29   14.83   0
 -10  -5   1  149.17   12.75   0
 -10   5   1  131.62   14.22   0
 -11  -5   1   58.02   16.71   0
 -11   5   1   39.73   13.89   0
 -11   5  -1   23.56   13.76   0
 -11  -5  -1   46.61   11.25   0
 -12  -5  -1  125.36   12.13   0
 -12  -5   1  126.72   12.43   0
 -12   5   1  115.85   14.93   0
 -12   5  -1  118.20   14.81   0
 -13  -5  -1    8.03   10.81   0
 -13   5  -1    2.40   16.77   0
 -13  -5   1   11.10   10.99   0
 -13   5   1   -1.32   11.59   0
 -14   5   1   69.46   13.96   0
 -14  -5   1   51.32   11.96   0
 -14   5  -1   59.58   14.37   0
 -14  -5  -1   88.72   11.90   0
 -15   5   1   12.57   12.02   0
 -15   5  -1   12.03   12.56   0
 -15  -5  -1    7.34   11.41   0
 -15  -5   1   20.78   11.46   0
 -16   5   1   15.81   12.67   0
 -16  -5  -1   21.58   11.57   0
 -16  -5   1   35.72   11.90   0
 -16   5  -1   15.86   13.88   0
 -17  -5   1   14.32   11.75   0
 -17   5  -1   -0.92   12.44   0
 -17   5   1    2.71   11.78   0
 -17  -5  -1    4.76   11.63   0
  -1  -6   1  136.70   17.06   0
  -2  -6   1  427.93   18.76   0
  -3  -6   1  345.38   17.28   0
   4  -6  -1  183.17   19.57   0
   4  -6   1  224.57   32.36   0
  -4  -6   1  236.71   15.84   0
  -5  -6   1   27.38   14.26   0
   5  -6  -1   28.00   15.86   0
  -5  -6  -1   26.29   14.39   0
   6  -6  -1    3.37   13.49   0
  -6  -6  -1    4.92   13.64   0
  -6  -6   1    9.89   13.34   0
  -7  -6  -1   10.56   12.54   0
  -7  -6   1   -1.13   12.83   0
   7  -6  -1    4.28   12.85   0
  -8  -6  -1   44.59   12.09   0
  -8  -6   1   51.17   12.08   0
  -9   6   1  136.76   16.22   0
  -9  -6  -1  163.23   12.31   0
  -9   6  -1  144.02   17.18   0
  -9  -6   1  168.88   12.39   0
 -10  -6  -1   20.39   11.23   0
 -10  -6   1    8.55   11.81   0
 -10   6   1   20.47   13.47   0
 -10   6  -1   23.17   18.59   0
 -11   6  -1   76.42   15.46   0
 -11  -6   1  100.65   11.47   0
 -11  -6  -1   70.94   12.24   0
 -11   6   1   83.32   15.19   0
 -12  -6   1   -0.67   11.00   0
 -12  -6  -1   -8.82   10.75   0
 -12   6   1   -1.03   18.36   0
 -12   6  -1   -0.22   12.48   0
 -13   6  -1   -0.97   11.87   0
 -13   6   1   -0.27   11.61   0
 -13  -6   1    2.68   10.05   0
 -13  -6  -1  -14.34   10.72   0
 -14  -6  -1   30.34   11.61   0
 -14   6  -1   28.59   13.47   0
 -14   6   1    8.26   12.82   0
 -14  -6   1   25.62   11.45   0
 -15  -6  -1   -8.16   16.32   0
 -15   6   1    1.86   12.56   0
 -15   6  -1    7.28   12.52   0
 -15  -6   1   10.01   11.33   0
 -16  -6   1    6.40   12.00   0
 -16   6  -1    5.43   13.34   0
 -16  -6  -1   17.77   11.35   0
 -16   6   1    8.39   13.33   0
  -1  -7   1   22.63   13.79   0
  -2  -7   1  237.21   15.65   0
  -3  -7   1 1119.90   22.91   0
  -4  -7   1  211.24   16.77   0
   4  -7   1  212.92   27.10   0
  -5  -7  -1   12.54   14.24   0
  -5  -7   1   12.65   13.76   0
   5  -7  -1    5.08   14.96   0
  -6  -7   1   29.88   17.57   0
   6  -7  -1   13.33   14.08   0
  -6  -7  -1   16.36   12.30   0
   7  -7  -1  155.37   22.29   0
  -7  -7   1  171.20   17.27   0
  -7  -7  -1  154.77   17.77   0
  -8  -7  -1  213.96   13.70   0
  -8  -7   1  207.12   13.80   0
  -9  -7   1   85.30   12.40   0
  -9  -7  -1   81.02   12.68   0
 -10  -7  -1  109.86   12.52   0
 -10  -7   1  141.51   17.78   0
 -11  -7  -1   57.32   12.56   0
 -12  -7  -1   19.79   17.58   0
 -13  -7   1   -7.10   10.71   0
 -13  -7  -1    0.46   10.28   0
 -14  -7   1   47.82   11.86   0
 -14  -7  -1   65.63   11.81   0
 -15  -7  -1   11.71   11.66   0
 -15  -7   1    8.10   11.33   0
 -16  -7   1   -6.78   10.70   0
 -16  -7  -1  -11.48   10.80   0
   0  -8   1  484.77   18.79   0
  -1  -8   1   54.56   14.38   0
  -2  -8   1   53.93   14.96   0
  -3  -8   1  158.53   15.40   0
   3  -8   1  145.22   16.66   0
  -4  -8   1  138.40   15.70   0
   4  -8   1  174.25   25.16   0
   5  -8   1  107.30   25.44   0
   5  -8  -1  103.50   18.52   0
   5  -8   1   65.32   19.62   0
  -5  -8  -1  116.37   14.02   0
  -5  -8   1  121.76   13.47   0
  -6  -8  -1  228.40   13.87   0
   6  -8  -1  233.87   20.67   0
  -6  -8   1  233.16   13.54   0
  -7  -8  -1   22.77   16.84   0
  -7  -8   1    6.91   11.63   0
   7  -8  -1   10.36   18.31   0
  -8  -8  -1   38.35   12.34   0
  -8  -8   1   43.84   12.23   0
  -9  -8   1   31.70   11.41   0
  -9  -8  -1    8.77   11.79   0
 -10  -8  -1   73.51   12.49   0
 -10  -8   1   96.65   12.31   0
 -11  -8   1   23.64   11.25   0
 -11  -8  -1    2.25   11.36   0
 -12  -8  -1   60.39   10.74   0
 -12  -8   1   43.41   12.12   0
 -13  -8   1    4.73   11.57   0
 -13  -8  -1    5.34   11.59   0
 -14  -8  -1   -4.01   11.24   0
 -14  -8   1   -6.87   11.42   0
 -15  -8   1   13.65   11.72   0
 -15  -8  -1    9.66   11.64   0
 -16  -8   1    3.03   11.99   0
 -16  -8  -1   -4.33   11.79   0
  -1  -9   1  680.84   19.86   0
   1  -9   1  712.18   21.57   0
   2  -9   1  220.16   17.89   0
  -2  -9   1  234.00   16.08   0
  -3  -9   1  107.66   14.61   0
   3  -9   1   93.28   15.46   0
   4  -9   1   11.70   14.56   0
  -4  -9   1   20.49   13.18   0
   5  -9  -1    6.07   14.69   0
  -5  -9   1   26.39   11.65   0
  -5  -9  -1   10.84   11.55   0
   5  -9   1    8.75   15.45   0
   5  -9   1    6.28   13.73   0
  -6  -9   1   10.30   11.26   0
  -6  -9  -1   -7.63   11.19   0
   6  -9  -1    3.58   13.31   0
  -7  -9  -1   32.63   16.35   0
  -7  -9   1    8.71   11.80   0
   7  -9  -1   16.83   20.76   0
  -8  -9   1   34.52   11.96   0
  -8  -9  -1   11.63   12.05   0
  -9  -9  -1   36.96   12.74   0
  -9  -9   1   44.94   11.71   0
 -10  -9   1  500.72   14.86   0
 -10  -9  -1  536.18   15.08   0
 -11  -9  -1   23.69   11.73   0
 -11  -9   1   28.41   11.87   0
 -12  -9   1   48.47   11.53   0
 -12  -9  -1   55.42   11.89   0
 -13  -9   1   19.12   11.30   0
 -13  -9  -1   18.24   11.53   0
 -14  -9  -1   94.11   11.71   0
 -14  -9   1   85.67   12.31   0
 -15  -9  -1    5.35   10.98   0
 -15  -9   1   -0.97   12.22   0
 -16  -9   1    8.93   12.40   0
 -16  -9  -1   15.54   17.42   0
   0 -10   1  120.33   21.19   0
  -1 -10   1  209.57   16.38   0
   1 -10   1  227.64   16.07   0
   2 -10   1   44.63   18.68   0
  -2 -10   1   55.13   13.82   0
   3 -10   1   26.69   13.60   0
  -3 -10   1   27.69   13.80   0
  -4 -10   1  365.28   15.02   0
   4 -10   1  384.58   24.40   0
  -5 -10   1    8.53   15.89   0
   5 -10   1   -0.75   12.96   0
  -5 -10  -1    9.58   11.65   0
  -6 -10  -1  176.20   12.56   0
  -6 -10   1  220.72   13.42   0
   6 -10  -1  185.96   18.23   0
  -7 -10   1   29.14   12.13   0
   7 -10  -1   16.79   16.97   0
  -7 -10  -1   25.21   11.31   0
  -8 -10   1   13.55   11.86   0
  -8 -10  -1   24.95   12.02   0
  -9 -10  -1   49.51   11.81   0
  -9 -10   1   48.51   12.21   0
 -10 -10  -1   13.04   11.97   0
 -10 -10   1   -0.94   11.56   0
 -11 -10  -1   50.44   12.14   0
 -11 -10   1   56.26   12.16   0
 -12 -10  -1   47.35   12.09   0
 -12 -10   1   45.53   11.99   0
 -13 -10  -1   31.25   11.40   0
 -13 -10   1   16.70   12.12   0
 -14 -10   1   14.05   11.35   0
 -14 -10  -1   29.34   11.62   0
 -15 -10  -1   14.39   11.49   0
 -15 -10   1    3.55   11.87   0
  -1 -11   1  323.10   15.63   0
   1 -11   1  322.54   16.44   0
  -2 -11   1   82.40   13.57   0
   2 -11   1   93.61   13.49   0
   3 -11   1  111.93   14.77   0
  -3 -11   1  129.49   13.09   0
  -4 -11  -1    7.01   12.00   0
  -4 -11   1    1.20   12.16   0
   4 -11   1    4.92   12.82   0
  -5 -11   1  104.38   12.88   0
   5 -11   1   93.34   15.46   0
  -5 -11  -1  115.73   12.51   0
  -6 -11  -1   55.99   12.77   0
   6 -11  -1   58.21   19.30   0
  -6 -11   1   67.99   12.79   0
   6 -11   1   50.89   19.79   0
   6 -11   1   57.52   18.74   0
   7 -11  -1   30.88   14.00   0
  -7 -11   1   36.44   12.21   0
  -7 -11  -1   49.42   11.98   0
   7 -11  -1   45.68   18.84   0
  -8 -11   1    4.37   11.99   0
  -8 -11  -1   20.76   11.54   0
  -9 -11  -1   16.01   11.55   0
  -9 -11   1   12.51   11.52   0
 -10 -11  -1    2.89   11.81   0
 -10 -11   1  -11.21   11.84   0
 -11 -11  -1   29.89   11.75   0
 -11 -11   1   13.30   11.72   0
 -12 -11  -1   11.08   11.30   0
 -13 -11  -1    9.99   12.04   0
 -14 -11   1   36.86   12.27   0
 -14 -11  -1   59.82   12.37   0
 -15 -11  -1   -2.45   11.11   0
 -15 -11   1   -6.46   16.05   0
   0 -12   1  244.22   14.50   0
   1 -12   1  123.13   18.07   0
  -1 -12   1  131.39   12.96   0
   2 -12   1   38.59   12.44   0
  -2 -12   1   20.09   12.52   0
   3 -12   1  181.21   14.36   0
  -3 -12   1  185.01   13.66   0
  -3 -12  -1  189.59   13.85   0
   4 -12   1  151.15   15.53   0
  -4 -12   1  187.35   13.30   0
  -4 -12  -1  212.65   13.68   0
  -5 -12  -1   46.77   11.75   0
   5 -12   1   35.13   12.87   0
  -5 -12   1   17.79   11.73   0
  -6 -12  -1  154.43   12.92   0
   6 -12   1  141.00   20.92   0
   6 -12  -1  115.37   15.94   0
   6 -12   1  123.56   21.70   0
  -6 -12   1  143.66   17.32   0
  -7 -12   1   18.62   11.83   0
  -7 -12  -1   -5.35   11.35   0
   7 -12  -1    7.49   17.44   0
   7 -12  -1    7.07   13.23   0
  -8 -12  -1    2.17   11.15   0
  -8 -12   1   14.76   11.30   0
  -9 -12  -1   56.74   12.10   0
  -9 -12   1   49.26   12.51   0
 -10 -12   1   22.56   11.10   0
 -10 -12  -1   19.06   11.19   0
 -11 -12  -1   92.04   12.39   0
 -11 -12   1  273.73   14.38   0
 -12 -12  -1   10.23   11.06   0
 -13 -12  -1   31.35   11.74   0
 -14 -12   1   -0.79   11.52   0
 -14 -12  -1   11.36   11.49   0
 -15 -12   1    4.67   12.55   0
 -15 -12  -1   15.50   12.54   0
   1 -13   1   60.05   13.14   0
  -1 -13   1   52.94   12.12   0
   2 -13   1  102.39   18.23   0
  -2 -13   1   77.26   12.18   0
  -3 -13  -1   17.17   12.32   0
  -3 -13   1   11.01   12.26   0
   3 -13   1   15.24   12.13   0
  -4 -13   1   -1.62   12.29   0
  -4 -13  -1    6.53   12.32   0
   4 -13   1   -1.35   11.56   0
  -5 -13  -1   71.73   12.66   0
  -5 -13   1   85.85   12.50   0
   5 -13   1   96.17   17.94   0
  -6 -13  -1   -9.06   11.58   0
   6 -13  -1    6.73   13.00   0
   6 -13   1    6.78   12.52   0
  -6 -13   1   17.22   11.68   0
  -7 -13   1   23.92   11.64   0
  -7 -13  -1   18.63   10.99   0
   7 -13  -1   20.75   13.57   0
   7 -13  -1   21.20   13.32   0
  -8 -13   1   30.07   11.48   0
  -8 -13  -1    2.66   11.19   0
  -9 -13   1   40.07   11.82   0
  -9 -13  -1   49.72   12.26   0
 -10 -13   1   -6.19   11.48   0
 -10 -13  -1   -2.14   11.20   0
 -11 -13   1   13.62   11.52   0
 -11 -13  -1   15.95   11.09   0
 -12 -13  -1   11.13   11.60   0
 -13 -13  -1    9.29   12.01   0
 -14 -13   1    5.95   12.04   0
 -14 -13  -1    6.59   11.36   0
   0 -14   1  257.13   13.83   0
  -1 -14   1   78.30   12.08   0
  -1 -14  -1   79.08   11.88   0
   1 -14   1   83.73   13.25   0
   2 -14   1  169.76   14.39   0
  -2 -14  -1  167.85   13.04   0
  -2 -14   1  174.62   13.09   0
   3 -14   1   73.95   12.49   0
  -3 -14   1  107.92   12.27   0
  -3 -14  -1   84.15   12.60   0
   4 -14   1  240.25   15.97   0
  -4 -14  -1  265.76   13.62   0
  -4 -14   1  260.02   14.14   0
   5 -14   1  122.38   15.58   0
  -5 -14   1  128.90   13.18   0
   5 -14  -1  126.98   19.43   0
  -5 -14  -1  134.99   13.48   0
  -6 -14  -1   65.29   11.84   0
   6 -14   1   61.67   14.64   0
   6 -14  -1   64.25   18.60   0
  -6 -14   1   51.96   12.25   0
   7 -14  -1    8.63   18.10   0
  -7 -14   1    7.10   11.36   0
  -7 -14  -1    6.22   11.98   0
   7 -14  -1    8.67   18.01   0
  -8 -14   1    9.55   11.92   0
  -8 -14  -1   12.25   11.31   0
  -9 -14   1   42.26   11.72   0
  -9 -14  -1   46.38   10.94   0
 -10 -14   1   -0.50   10.66   0
 -10 -14  -1  -15.51   10.88   0
 -11 -14  -1   59.11   11.61   0
 -11 -14   1   41.77   12.20   0
 -12 -14  -1    5.49   11.61   0
 -13 -14  -1   -0.34   11.46   0
 -14 -14   1   14.05   12.11   0
 -14 -14  -1    2.11   12.36   0
   1 -15   1   29.10   11.98   0
   1 -15  -1   41.84   13.14   0
  -1 -15   1   42.07   12.17   0
  -1 -15  -1   35.25   12.13   0
   2 -15   1   23.86   12.38   0
  -2 -15  -1   18.07   11.84   0
   2 -15  -1   16.64   12.28   0
  -2 -15   1   22.83   12.18   0
   3 -15   1    4.05   17.01   0
   3 -15  -1   29.19   12.95   0
  -3 -15   1    5.02   12.77   0
  -3 -15  -1   28.29   11.87   0
   4 -15  -1   27.28   12.04   0
  -4 -15  -1   36.77   12.20   0
  -4 -15   1   24.62   12.56   0
   4 -15   1   16.94   11.71   0
   5 -15   1    8.45   12.01   0
   5 -15  -1    9.56   12.25   0
  -5 -15  -1   20.50   16.65   0
  -5 -15   1   10.20   12.02   0
   6 -15  -1    4.50   12.13   0
  -6 -15  -1    5.11   12.01   0
  -6 -15   1    4.16   12.23   0
   6 -15   1    4.48   12.71   0
   7 -15   1   55.24   19.42   0
  -7 -15   1   67.65   12.15   0
   7 -15  -1   47.67   14.09   0
   7 -15  -1   64.10   18.44   0
  -7 -15  -1   52.55   11.97   0
   7 -15   1   47.03   19.35   0
  -8 -15   1    6.29   10.99   0
  -8 -15  -1   14.32   10.98   0
  -9 -15   1   17.41   10.77   0
 -10 -15   1   11.73   10.78   0
 -10 -15  -1    8.90   10.92   0
 -11 -15   1  -11.46   11.53   0
 -11 -15  -1  -12.53   11.63   0
 -12 -15  -1   11.11   10.97   0
 -13 -15  -1   16.85   11.83   0
   0 -16  -1  180.28   13.96   0
   0 -16   1  195.41   13.10   0
   1 -16  -1    4.16   12.35   0
  -1 -16  -1    4.99   11.81   0
   1 -16   1    2.92   11.18   0
  -1 -16   1   10.92   11.60   0
   2 -16   1  403.29   19.79   0
  -2 -16  -1  357.23   13.67   0
  -2 -16   1  381.63   14.25   0
   2 -16  -1  377.46   15.38   0
   3 -16  -1   14.41   11.56   0
  -3 -16   1    7.27   11.32   0
  -3 -16  -1   10.24   11.70   0
   3 -16   1    3.79   12.26   0
   4 -16   1  160.51   19.45   0
  -4 -16   1  138.27   12.31   0
  -4 -16  -1  146.16   12.59   0
   4 -16  -1  147.13   14.19   0
  -5 -16  -1   23.33   11.61   0
   5 -16  -1   -3.26   11.88   0
   5 -16   1   12.20   12.40   0
  -5 -16   1   10.09   11.50   0
   6 -16   1   98.17   18.26   0
  -6 -16   1  101.61   12.85   0
   6 -16  -1   89.84   13.88   0
  -6 -16  -1  117.49   12.55   0
   7 -16   1    0.98   11.80   0
   7 -16  -1   -4.62   16.66   0
   7 -16   1    1.96   12.32   0
   7 -16  -1    2.74   12.44   0
  -7 -16  -1   11.88   11.36   0
  -7 -16   1   -3.84   11.80   0
  -8 -16   1   20.79   10.85   0
  -8 -16  -1   30.06   11.41   0
  -9 -16  -1  110.02   12.13   0
 -10 -16   1   18.91   11.67   0
 -11 -16   1   68.57   12.05   0
 -13 -16  -1    5.04   11.70   0
  -1 -17  -1  -10.43   12.32   0
  -1 -17   1  -12.05   16.84   0
   1 -17  -1    7.85   11.85   0
   1 -17   1   -0.40   11.75   0
  -2 -17   1    5.46   11.15   0
   2 -17  -1   -2.67   11.78   0
   2 -17   1   15.80   11.90   0
  -2 -17  -1    0.45   11.49   0
  -3 -17  -1   59.23   16.64   0
  -3 -17   1   65.62   12.36   0
   3 -17  -1   62.65   12.77   0
   3 -17   1   65.64   13.52   0
   4 -17  -1   11.01   12.42   0
   4 -17   1    5.35   11.99   0
  -4 -17  -1   19.34   12.07   0
  -4 -17   1   11.19   12.28   0
  -5 -17   1   27.83   12.13   0
   5 -17  -1    5.02   12.16   0
   5 -17   1    9.25   11.64   0
  -6 -17  -1   -8.12   11.59   0
  -6 -17   1   -3.16   11.95   0
   6 -17   1   -0.91   11.37   0
   6 -17  -1    0.25   11.42   0
   7 -17  -1   59.38   14.76   0
   7 -17  -1   64.93   14.37   0
   7 -17   1   66.28   20.77   0
  -7 -17  -1   67.50   12.39   0
   7 -17   1   94.27   21.33   0
  -8 -17   1   10.71   11.23   0
  -9 -17   1   19.33   11.27   0
  -9 -17  -1   16.98   11.72   0
 -10 -17  -1   12.09   11.19   0
 -11 -17   1   10.37   11.52   0
 -12 -17   1    7.22   12.17   0
   0 -18   1  202.85   13.90   0
   0 -18  -1  230.33   18.11   0
   1 -18  -1   21.00   17.69   0
   1 -18   1    2.04   11.22   0
  -1 -18   1  -12.10   12.15   0
  -1 -18  -1    9.69   10.85   0
  -2 -18  -1   43.17   11.58   0
  -2 -18   1   37.67   12.83   0
   2 -18  -1   50.36   12.87   0
   2 -18   1   47.31   12.63   0
  -3 -18  -1   54.61   12.34   0
  -3 -18   1   37.10   11.73   0
   3 -18   1   62.19   13.04   0
   3 -18  -1   59.65   12.77   0
  -4 -18   1  119.83   12.94   0
   4 -18   1  125.08   13.64   0
  -4 -18  -1   57.78   13.12   0
   4 -18  -1  140.08   13.63   0
   5 -18  -1    8.83   11.53   0
  -5 -18  -1    8.14   11.86   0
   5 -18   1   16.05   12.12   0
  -5 -18   1   11.07   11.66   0
  -6 -18   1   18.33   11.61   0
   6 -18  -1   32.52   12.06   0
   6 -18   1   33.60   13.01   0
   7 -18   1   43.63   14.98   0
   7 -18   1   77.33   19.84   0
  -7 -18   1   90.79   12.38   0
   7 -18  -1   48.60   14.94   0
  -7 -18  -1   76.28   12.25   0
   7 -18  -1   68.02   14.15   0
  -8 -18  -1   13.24   11.76   0
   8 -18  -1    2.91   17.58   0
  -9 -18   1   20.94   12.10   0
 -10 -18   1    2.55   11.76   0
 -10 -18  -1   -5.12   11.28   0
 -11 -18  -1   19.38   12.11   0
  -1 -19   1    8.37   11.49   0
   1 -19  -1   -5.92   11.30   0
   1 -19   1   11.91   12.06   0
  -1 -19  -1   -4.42   11.38   0
   2 -19  -1   21.15   11.81   0
  -2 -19  -1   17.63   15.74   0
  -2 -19   1   40.92   11.95   0
   2 -19   1   10.82   11.85   0
   3 -19  -1    3.15   11.56   0
  -3 -19  -1   -4.82   10.22   0
   3 -19   1    6.49   16.67   0
  -3 -19   1    8.75   11.16   0
  -4 -19   1   19.80   11.30   0
  -4 -19  -1   -5.78   11.75   0
   4 -19  -1   17.43   11.44   0
   4 -19   1    4.02   11.65   0
   5 -19   1    3.00   16.87   0
   5 -19  -1    6.65   11.60   0
  -5 -19   1   14.54   11.65   0
  -6 -19   1   34.11   12.72   0
  -6 -19  -1   18.57   12.34   0
   6 -19  -1   30.56   17.95   0
   6 -19   1   23.18   17.57   0
  -7 -19   1   30.68   11.60   0
   7 -19  -1   38.61   13.80   0
   7 -19  -1   55.79   18.62   0
   7 -19   1   27.60   14.45   0
   7 -19   1   32.59   13.76   0
   8 -19  -1    4.96   18.26   0
  -8 -19   1   14.57   11.47   0
  -8 -19  -1   10.66   11.88   0
   8 -19  -1    2.79   18.10   0
  -9 -19  -1    7.75   11.41   0
 -10 -19   1   15.12   11.89   0
   0 -20  -1   45.17   12.01   0
   0 -20   1   43.76   16.67   0
   1 -20   1    9.43   12.38   0
  -1 -20   1   -6.87   11.80   0
   1 -20  -1   16.06   11.37   0
  -1 -20  -1    3.65   11.35   0
   2 -20  -1   20.13   11.83   0
  -2 -20   1   34.82   11.78   0
  -2 -20  -1   33.82   11.33   0
   2 -20   1   25.43   12.30   0
  -3 -20  -1   24.20   11.83   0
  -3 -20   1    6.23   11.40   0
   3 -20  -1   36.39   12.77   0
   3 -20   1   29.49   12.44   0
   4 -20  -1   -2.59   11.95   0
  -4 -20  -1   21.36   11.68   0
  -4 -20   1    4.27   11.82   0
   4 -20   1    0.65   12.90   0
  -5 -20  -1   22.88   11.25   0
   5 -20  -1   14.91   12.09   0
  -5 -20   1    4.69   12.00   0
   5 -20   1    9.73   11.95   0
  -6 -20   1   -5.84   11.73   0
   6 -20  -1    5.43   17.50   0
   6 -20   1    4.98   11.73   0
   7 -20  -1    4.51   12.31   0
  -7 -20   1   13.75   11.29   0
   7 -20   1    2.15   13.03   0
  -7 -20  -1   -5.22   12.28   0
   7 -20  -1    5.06   12.90   0
   8 -20  -1   -0.72   13.15   0
  -8 -20   1   11.59   11.60   0
   8 -20  -1    0.45   18.04   0
  -9 -20   1   33.02   12.93   0
   1 -21  -1   18.46   11.86   0
  -1 -21  -1   23.47   11.88   0
   1 -21   1    6.14   11.90   0
  -1 -21   1   20.52   10.82   0
   2 -21  -1    7.05   12.16   0
  -2 -21   1   18.28   11.54   0
  -2 -21  -1   13.37   11.24   0
   2 -21   1   38.56   12.25   0
   3 -21  -1   12.78   11.67   0
  -3 -21  -1    6.43   11.50   0
   3 -21   1    8.79   11.89   0
  -3 -21   1    7.82   11.52   0
   4 -21  -1   21.03   12.75   0
  -4 -21  -1   27.97   11.44   0
   4 -21   1   28.92   12.70   0
  -4 -21   1   37.47   11.41   0
   5 -21   1    5.62   12.33   0
   5 -21  -1    3.66   17.33   0
  -6 -21  -1   -5.75   11.33   0
  -6 -21   1    5.22   11.20   0
   6 -21   1    4.75   12.83   0
   6 -21  -1   -3.56   17.17   0
   7 -21   1   -1.58   12.88   0
   7 -21  -1    0.55   12.90   0
   7 -21  -1    7.08   13.28   0
  -7 -21   1    4.41   11.82   0
   8 -21  -1    0.12   18.35   0
   8 -21  -1    2.41   21.91   0
  -8 -21  -1  -13.02   12.40   0
   0 -22   1   -6.25   11.94   0
   0 -22  -1   -0.85   11.80   0
  -1 -22   1   12.33   10.98   0
   1 -22  -1   10.55   11.56   0
   1 -22   1    5.92   11.99   0
  -1 -22  -1    8.73   12.26   0
  -2 -22  -1   20.75   12.84   0
   2 -22   1    3.15   11.71   0
  -2 -22   1    9.24   11.41   0
   2 -22  -1   -0.67   11.66   0
  -3 -22  -1   34.82   11.34   0
   3 -22  -1   36.86   12.75   0
  -3 -22   1   42.06   12.18   0
   3 -22   1   24.47   12.80   0
   4 -22  -1   33.63   12.85   0
  -4 -22   1   37.69   10.98   0
   4 -22   1   34.00   12.69   0
  -4 -22  -1   22.94   11.46   0
   5 -22  -1   -2.24   17.75   0
  -5 -22   1   -0.38   12.09   0
  -5 -22  -1  -15.25   11.88   0
   5 -22   1    6.63   12.76   0
   6 -22   1    4.28   13.67   0
   6 -22  -1    6.94   18.85   0
  -6 -22   1    2.57   11.05   0
   1 -23  -1   57.36   13.15   0
  -1 -23  -1   37.71   12.61   0
   1 -23   1   66.34   13.13   0
  -1 -23   1   19.37   13.26   0
   2 -23  -1    7.65   12.31   0
  -2 -23   1   -1.94   11.81   0
   2 -23   1   -6.68   12.07   0
  -2 -23  -1   15.22   12.57   0
   3 -23  -1    2.83   11.64   0
  -3 -23   1   23.57   12.12   0
   3 -23   1    3.41   12.46   0
   4 -23   1   31.74   13.02   0
   4 -23  -1   23.11   12.63   0
  -4 -23   1    8.36   12.51   0
  -1   0   2    1.54   15.14   0
   1   0  -2    5.14   13.64   0
   2   0  -2  192.58   21.98   0
  -2   0   2  159.11   21.85   0
   3   0  -2  465.38   24.78   0
  -3   0   2  372.45   24.29   0
   4   0  -2 4080.37   46.13   0
  -4   0   2 4020.96   46.31   0
   5   0  -2   87.12   14.88   0
  -5   0   2  104.84   15.55   0
  -5   0  -2   90.57   15.78   0
  -6   0   2 2781.28   33.02   0
   6   0  -2 2801.07   33.58   0
  -6   0  -2 2750.29   34.69   0
   7   0  -2  577.04   19.94   0
  -7   0   2  582.05   19.84   0
  -7   0  -2  572.42   19.63   0
  -8   0  -2  395.57   16.44   0
  -8   0   2  372.42   16.58   0
  -9   0   2   34.95   11.89   0
  -9   0  -2   40.56   16.98   0
 -10   0   2   18.02   11.11   0
 -10   0  -2   -2.20   12.45   0
 -11   0  -2  164.48   18.54   0
 -11   0   2  173.01   18.80   0
 -12   0   2    1.80   17.02   0
 -12   0  -2    5.40   11.73   0
 -13   0  -2    1.54   11.17   0
 -13   0   2    0.26   11.95   0
 -14   0  -2    8.77   10.90   0
 -14   0   2    2.23   11.28   0
 -15   0  -2  260.29   14.57   0
 -15   0   2  255.55   14.15   0
 -16   0  -2   28.79   11.99   0
 -16   0   2   18.45   17.23   0
 -17   0  -2   21.09   12.02   0
 -17   0   2   -3.46   12.42   0
   1   1  -2  124.59   16.66   0
  -1  -1   2  135.04   23.45   0
  -1   1   2  129.96   21.11   0
   1  -1  -2  126.73   19.87   0
  -2   1   2  261.63   25.40   0
   2  -1  -2  270.03   24.86   0
   2   1  -2  256.24   22.30   0
  -2  -1   2  265.74   22.72   0
  -3   1   2  355.34   24.79   0
   3   1  -2  363.29   22.33   0
  -3  -1   2  355.59   22.69   0
   3  -1  -2  371.41   30.54   0
  -4   1   2 1779.21   35.14   0
   4  -1  -2 1818.07   37.51   0
   4   1  -2 1777.92   30.95   0
  -4   1  -2 1569.36   35.26   0
  -4  -1   2 1768.72   30.81   0
  -5   1   2  208.96   17.55   0
  -5  -1   2  221.22   16.24   0
   5  -1  -2  225.88   17.80   0
   5   1  -2  215.74   16.43   0
  -5   1  -2  215.18   17.83   0
   6  -1  -2  153.13   15.39   0
   6   1  -2  150.93   16.20   0
  -6   1  -2  144.86   16.46   0
  -6  -1  -2  146.92   15.90   0
  -6  -1   2  153.86   15.89   0
  -6   1   2  144.56   15.54   0
  -7  -1  -2  181.00   16.17   0
   7  -1  -2  184.17   16.87   0
  -7  -1   2  191.27   16.21   0
   7   1  -2  193.56   15.84   0
  -7   1  -2  178.96   16.25   0
  -7   1   2  179.38   16.97   0
  -8   1   2   11.09   13.44   0
   8  -1  -2    9.05   11.56   0
  -8   1  -2    5.69   11.75   0
  -8  -1   2    3.65   18.26   0
  -8  -1  -2   27.80   17.79   0
  -9  -1  -2  115.80   13.03   0
  -9   1  -2  111.78   13.42   0
  -9  -1   2  117.47   12.72   0
  -9   1   2  115.70   13.29   0
 -10   1  -2   71.61   12.54   0
 -10  -1   2   63.60   12.18   0
 -10  -1  -2   70.64   12.53   0
 -10   1   2   87.02   13.09   0
 -11   1   2    7.52   12.17   0
 -11  -1  -2   33.44   11.54   0
 -11   1  -2   33.27   12.46   0
 -11  -1   2   39.72   12.79   0
 -12   1   2   40.91   12.31   0
 -12   1  -2   40.29   12.53   0
 -12  -1  -2   39.45   12.17   0
 -12  -1   2   38.71   12.53   0
 -13  -1  -2   57.75   12.44   0
 -13   1   2   74.81   12.35   0
 -13  -1   2   53.20   11.60   0
 -13   1  -2   73.94   12.72   0
 -14  -1   2   27.80   11.55   0
 -14   1  -2   19.26   11.45   0
 -14  -1  -2   39.74   11.70   0
 -14   1   2   36.13   11.85   0
 -15   1   2   24.53   11.63   0
 -15  -1  -2    8.03   11.99   0
 -15   1  -2   16.10   11.11   0
 -15  -1   2    4.70   11.33   0
 -16  -1  -2   -4.04   11.02   0
 -16  -1   2   -5.65   11.36   0
 -16   1  -2   -4.80   11.50   0
 -16   1   2   -3.34   11.69   0
 -17   1  -2   10.74   12.59   0
 -17   1   2    2.92   12.21   0
 -17  -1   2    9.27   12.17   0
 -17  -1  -2   -0.23   12.24   0
   0  -2   2   21.38   16.45   0
   0   2  -2   12.47   15.70   0
  -1  -2   2  332.17   22.39   0
   1   2  -2  340.63   22.33   0
   1  -2   2  292.15   30.30   0
  -1   2  -2  328.83   30.66   0
  -2   2   2 2282.87   52.52   0
  -2  -2   2 1368.24   31.39   0
   2  -2  -2 2426.19   53.29   0
   2   2  -2 2394.38   39.11   0
  -3   2   2  711.51   35.53   0
   3   2  -2  686.89   23.38   0
   3  -2  -2  693.03   29.94   0
  -3  -2   2  712.14   23.80   0
   4   2  -2 3235.60   36.89   0
  -4   2  -2 2375.61   50.65   0
  -4   2   2 3247.78   48.98   0
  -4  -2   2 3185.81   36.55   0
   4  -2  -2 1272.79   32.11   0
   5   2  -2  711.54   19.96   0
  -5   2  -2  670.57   25.79   0
  -5   2   2  604.74   23.32   0
   5  -2  -2  569.19   22.08   0
  -5  -2   2  714.60   19.84   0
  -6   2   2   49.37   15.32   0
  -6  -2   2   55.27   15.02   0
  -6  -2  -2   47.47   15.10   0
   6  -2  -2   65.56   15.12   0
  -6   2  -2   58.33   15.29   0
   6   2  -2   62.76   15.42   0
  -7   2   2 1333.06   26.97   0
  -7  -2   2 1344.71   23.75   0
  -7  -2  -2 1314.78   24.01   0
   7  -2  -2 1330.78   26.98   0
  -7   2  -2 1307.06   28.29   0
  -8  -2   2  192.45   14.58   0
  -8   2   2  203.17   15.49   0
   8  -2  -2  215.30   15.28   0
  -8   2  -2  206.04   20.23   0
  -8  -2  -2  196.07   14.09   0
  -9  -2  -2   38.49   11.84   0
  -9  -2   2   43.64   12.24   0
  -9   2   2   39.86   12.65   0
  -9   2  -2   47.16   11.94   0
 -10  -2  -2   -4.13   11.02   0
 -10   2   2   -3.00   11.88   0
 -10   2  -2   -9.27   11.93   0
 -10  -2   2   -0.35   10.95   0
 -11  -2   2   29.61   11.15   0
 -11   2   2   60.24   13.25   0
 -11  -2  -2   53.65   12.57   0
 -11   2  -2   61.53   17.35   0
 -12  -2  -2   22.38   11.74   0
 -12   2   2   21.88   16.61   0
 -12  -2   2   36.29   16.25   0
 -12   2  -2   38.49   11.31   0
 -13   2  -2  109.83   14.42   0
 -13   2   2  129.09   13.67   0
 -13  -2  -2  111.40   11.77   0
 -13  -2   2  112.34   17.91   0
 -14   2  -2   18.42   15.85   0
 -14  -2   2   17.01   16.31   0
 -14   2   2   11.02   11.63   0
 -14  -2  -2   17.36   11.29   0
 -15  -2   2  128.57   13.25   0
 -15   2  -2  126.96   14.88   0
 -15  -2  -2  122.75   12.69   0
 -15   2   2  117.85   13.29   0
 -16  -2  -2   -7.04   11.30   0
 -16   2  -2    2.66   11.82   0
 -16  -2   2   -4.83   11.77   0
 -16   2   2   -0.38   11.90   0
 -17   2   2   33.55   18.14   0
 -17  -2   2   42.95   12.52   0
 -17   2  -2   27.14   13.48   0
 -17  -2  -2   42.67   12.83   0
  -1   3  -2  107.47   28.36   0
   1   3  -2   85.78   19.20   0
  -1  -3   2  102.21   19.24   0
   1  -3   2   99.98   22.61   0
  -2  -3   2 1164.36   27.95   0
   2   3  -2 1208.15   27.91   0
   3  -3  -2  777.85   32.20   0
  -3  -3   2  725.91   22.21   0
   3   3  -2  759.98   22.15   0
  -3   3   2  741.32   32.70   0
   4  -3  -2  620.28   26.35   0
  -4  -3   2  695.05   20.93   0
  -4   3   2  653.54   27.27   0
  -4   3  -2  637.14   35.42   0
   4   3  -2  679.09   20.89   0
   5  -3  -2  188.64   17.44   0
  -5  -3   2  186.68   14.87   0
   5   3  -2  183.20   15.12   0
  -5   3  -2  149.44   18.26   0
  -5   3   2  187.61   18.35   0
  -6  -3   2  281.98   17.04   0
  -6  -3  -2  303.36   17.03   0
   6  -3  -2  310.78   19.06   0
  -6   3  -2  302.86   19.93   0
  -6   3   2  303.63   19.40   0
  -7   3  -2    6.34   13.61   0
  -7  -3  -2   28.31   13.43   0
  -7  -3   2   15.30   13.74   0
   7  -3  -2    7.12   13.74   0
  -7   3   2    9.49   14.50   0
  -8  -3  -2   27.28   12.29   0
   8  -3  -2    5.44   12.63   0
  -8  -3   2    1.36   12.77   0
  -8   3  -2    5.52   12.64   0
  -8   3   2   13.32   13.04   0
  -9  -3  -2   12.80   11.08   0
  -9   3  -2    2.74   12.37   0
  -9  -3   2    4.45   16.16   0
  -9   3   2    2.46   16.82   0
 -10   3   2   30.79   17.56   0
 -10   3  -2   14.59   12.59   0
 -10  -3   2   55.63   15.33   0
 -10  -3  -2   21.10   11.34   0
 -11  -3  -2   13.17   11.76   0
 -11  -3   2   19.95   15.81   0
 -11   3   2   18.15   11.69   0
 -11   3  -2   27.62   11.33   0
 -12   3   2    7.90   12.37   0
 -12  -3   2   34.90   12.10   0
 -12  -3  -2   12.67   11.89   0
 -12   3  -2    6.50   17.51   0
 -13  -3   2   44.49   12.23   0
 -13  -3  -2   38.45   11.07   0
 -13   3   2   40.22   12.65   0
 -13   3  -2   41.53   12.43   0
 -14   3   2    5.90   11.84   0
 -14  -3   2   17.94   11.07   0
 -14   3  -2    6.31   11.24   0
 -14  -3  -2    6.08   11.53   0
 -15  -3   2   18.21   11.28   0
 -15  -3  -2   10.24   11.66   0
 -15   3  -2    3.56   11.40   0
 -15   3   2    4.83   12.91   0
 -16   3   2    4.75   11.99   0
 -16  -3   2   -4.73   11.62   0
 -16  -3  -2   11.99   11.00   0
 -16   3  -2    3.50   11.39   0
 -17   3   2    4.10   12.24   0
 -17  -3  -2    2.62   12.12   0
 -17  -3   2    2.78   12.28   0
 -17   3  -2   12.83   12.40   0
   0  -4   2  206.25   21.39   0
   0   4  -2  207.53   22.48   0
  -1  -4   2  132.77   19.55   0
   1  -4   2  141.61   27.57   0
   1   4  -2  120.57   17.48   0
  -2  -4   2   35.45   21.62   0
   2  -4   2   46.92   19.06   0
   2   4  -2   43.82   15.22   0
  -3  -4   2    8.83   13.60   0
   3  -4  -2    5.73   17.37   0
   3   4  -2    2.03   14.57   0
   4  -4  -2  340.44   22.54   0
  -4  -4   2  339.45   22.29   0
  -5   4   2  302.94   21.39   0
   5  -4  -2  305.36   20.47   0
  -5   4  -2  223.05   24.90   0
  -5  -4   2  318.60   17.10   0
  -6   4   2  237.86   19.01   0
  -6   4  -2  224.61   21.80   0
  -6  -4  -2  233.15   16.47   0
  -6  -4   2  233.02   16.20   0
   6  -4  -2  247.69   22.54   0
   7  -4  -2   97.37   15.04   0
  -7   4  -2   79.10   15.64   0
  -7  -4   2   86.30   14.16   0
  -7   4   2   85.25   16.26   0
  -7  -4  -2   48.16   14.00   0
  -8  -4   2   64.86   13.16   0
  -8   4   2   39.38   13.87   0
  -8   4  -2   55.05   14.06   0
   8  -4  -2   43.74   12.44   0
  -8  -4  -2   58.97   12.66   0
   9  -4  -2  321.76   15.85   0
  -9   4  -2  304.08   17.63   0
  -9   4   2  331.32   16.56   0
  -9  -4   2  287.92   13.29   0
  -9  -4  -2  339.10   13.87   0
 -10   4  -2    9.51   11.86   0
 -10  -4  -2    5.08   11.48   0
 -10  -4   2  -12.58   15.62   0
 -10   4   2    4.07   11.70   0
 -11  -4  -2   63.87   11.63   0
 -11  -4   2   57.97   15.94   0
 -11   4   2   50.02   13.25   0
 -11   4  -2   48.72   13.80   0
 -12   4  -2   20.91   13.82   0
 -12  -4  -2   35.90   11.99   0
 -12   4   2   -5.34   12.48   0
 -12  -4   2   44.61   16.03   0
 -13  -4   2   21.57   11.40   0
 -13   4  -2   39.34   12.84   0
 -13  -4  -2   45.11   12.05   0
 -13   4   2   45.36   13.30   0
 -14  -4  -2    6.06   15.76   0
 -14   4  -2    9.76   11.65   0
 -14  -4   2    8.96   15.67   0
 -14   4   2    9.25   16.60   0
 -15  -4  -2   79.36   11.90   0
 -15  -4   2   94.84   12.46   0
 -15   4   2   83.32   14.52   0
 -15   4  -2   77.77   18.25   0
 -16  -4   2   30.93   11.87   0
 -16   4   2   22.23   12.53   0
 -16  -4  -2    8.16   12.16   0
 -16   4  -2    9.11   12.15   0
 -17   4   2    7.61   12.54   0
 -17  -4   2    6.99   12.18   0
 -17  -4  -2    8.74   12.21   0
 -17   4  -2    3.32   12.31   0
  -1  -5   2  578.25   21.59   0
   1  -5   2  563.40   25.32   0
  -2  -5   2   42.96   21.07   0
   2  -5   2   48.84   23.01   0
   3  -5   2  150.18   24.53   0
  -3  -5   2  347.93   17.49   0
  -4  -5   2   13.25   13.81   0
   4  -5  -2   14.62   21.98   0
   5  -5  -2  118.41   22.17   0
  -5  -5   2  116.03   15.60   0
  -6  -5   2  143.83   14.59   0
   6  -5  -2  150.17   22.00   0
  -6  -5  -2  148.27   15.56   0
  -6   5   2  136.22   18.78   0
  -7  -5   2   60.62   13.59   0
  -7   5   2   54.39   16.31   0
  -7  -5  -2   65.58   14.08   0
   7  -5  -2   58.24   14.27   0
  -7   5  -2   66.16   23.13   0
  -8   5  -2   85.65   16.20   0
  -8  -5   2  113.48   12.91   0
  -8   5   2  112.09   20.89   0
   8  -5  -2   93.61   14.04   0
  -8  -5  -2  118.29   12.98   0
  -9  -5   2  150.96   12.61   0
  -9   5  -2   10.24   13.45   0
  -9   5   2  135.03   14.72   0
   9  -5  -2  149.97   14.34   0
  -9  -5  -2  132.76   11.96   0
 -10  -5  -2   26.26   11.73   0
 -10   5   2   50.01   13.61   0
 -10   5  -2   46.87   13.34   0
 -10  -5   2   55.50   11.93   0
 -11   5   2   27.46   12.60   0
 -11  -5   2   15.57   11.40   0
 -11  -5  -2   27.79   11.59   0
 -11   5  -2   25.70   12.62   0
 -12  -5   2    3.63   10.98   0
 -12   5   2    2.57   12.53   0
 -12   5  -2    3.37   12.31   0
 -12  -5  -2    4.96   10.83   0
 -13   5  -2   38.29   12.35   0
 -13  -5   2   26.38   12.07   0
 -13  -5  -2   30.96   11.91   0
 -13   5   2   43.98   18.00   0
 -14   5   2    3.08   11.98   0
 -14  -5  -2   14.03   10.87   0
 -14  -5   2    8.88   11.21   0
 -14   5  -2    8.15   12.74   0
 -15  -5  -2   34.45   11.58   0
 -15   5   2   10.92   12.02   0
 -15   5  -2   19.91   12.43   0
 -15  -5   2   20.54   11.39   0
 -16   5  -2    2.72   17.69   0
 -16   5   2    7.54   17.86   0
 -16  -5  -2   13.71   10.88   0
 -16  -5   2   -0.67   11.45   0
 -17  -5  -2    4.34   12.59   0
 -17  -5   2    4.59   12.08   0
 -17   5   2    2.81   18.53   0
 -17   5  -2   -3.91   12.65   0
   0  -6   2  212.69   17.81   0
  -1  -6   2   22.25   20.24   0
   1  -6   2   18.78   15.44   0
   2  -6   2  315.40   21.10   0
  -2  -6   2  301.55   17.35   0
   3  -6   2    1.27   20.03   0
  -3  -6   2   11.65   13.61   0
  -4  -6   2   79.02   14.21   0
   4  -6  -2   84.07   17.67   0
  -5  -6   2   24.59   15.26   0
   5  -6  -2    6.70   14.98   0
  -6  -6  -2  260.62   15.45   0
   6  -6  -2  263.98   19.68   0
  -6  -6   2  189.05   14.94   0
  -7  -6  -2  461.13   15.62   0
   7  -6  -2  409.25   20.81   0
  -7  -6   2  455.01   16.03   0
  -8  -6  -2    5.94   16.13   0
   8  -6  -2    4.87   12.88   0
  -8  -6   2    5.42   11.05   0
  -9   6   2  233.18   18.06   0
  -9  -6  -2  251.55   13.30   0
   9  -6  -2  242.74   17.03   0
  -9   6  -2  244.14   24.58   0
  -9  -6   2  249.47   13.43   0
 -10  -6   2   70.02   11.95   0
 -10   6   2   85.14   19.47   0
 -10  -6  -2   94.64   12.34   0
 -10   6  -2   79.05   19.75   0
 -11   6  -2  153.74   17.08   0
 -11   6   2   66.29   14.49   0
 -11  -6  -2  169.13   17.31   0
 -11  -6   2  160.55   12.84   0
 -12   6  -2   -1.66   12.28   0
 -12  -6  -2  -13.17   10.75   0
 -12   6   2    2.06   12.87   0
 -12  -6   2   -4.40   11.25   0
 -13   6   2   26.65   12.82   0
 -13  -6  -2   34.39   11.25   0
 -13   6  -2   23.99   13.23   0
 -13  -6   2   35.19   11.50   0
 -14  -6   2   32.35   11.46   0
 -14  -6  -2   38.10   11.31   0
 -14   6  -2   23.90   17.77   0
 -14   6   2   30.34   14.14   0
 -15   6   2    1.82   12.73   0
 -15  -6  -2    5.84   11.50   0
 -15  -6   2   13.71   11.58   0
 -15   6  -2    5.26   16.92   0
 -16  -6  -2    8.52   11.18   0
 -16   6   2    7.86   17.87   0
 -16   6  -2    1.39   12.47   0
 -16  -6   2    3.46   10.79   0
  -1  -7   2  359.14   17.34   0
   1  -7   2  377.70   19.49   0
  -2  -7   2   17.29   18.94   0
   2  -7   2   -1.49   14.32   0
   3  -7   2  235.20   23.51   0
  -3  -7   2  217.85   16.33   0
   4  -7   2   40.58   23.66   0
  -4  -7   2   55.35   14.48   0
   5  -7  -2  365.83   27.40   0
  -5  -7   2  346.92   16.48   0
   6  -7  -2    5.62   14.01   0
  -6  -7  -2   13.68   13.01   0
  -6  -7   2   16.77   12.30   0
   7  -7  -2  164.28   17.06   0
  -7  -7  -2  172.95   13.34   0
  -7  -7   2  166.32   13.07   0
  -8  -7  -2   38.06   12.12   0
   8  -7  -2   31.86   12.84   0
  -8  -7   2   42.24   11.68   0
   9  -7  -2    1.33   11.21   0
  -9  -7   2   -2.07   11.98   0
  -9  -7  -2   18.33   11.41   0
 -10  -7  -2    3.46   12.35   0
 -10  -7   2  -13.26   12.45   0
 -11  -7  -2    5.82   12.07   0
 -11  -7   2   25.76   11.60   0
 -12  -7  -2  116.23   12.26   0
 -13  -7   2   -2.95   10.56   0
 -13  -7  -2    3.16   10.25   0
 -14  -7   2    8.75   11.62   0
 -14  -7  -2   -6.65   11.14   0
 -15  -7  -2   -0.26   11.14   0
 -15  -7   2    9.63   11.42   0
 -16  -7   2   -3.59   10.80   0
 -16  -7  -2   13.90   16.77   0
   0  -8   2   78.15   14.28   0
   1  -8   2   88.60   15.25   0
  -1  -8   2   94.64   14.79   0
  -2  -8   2  171.84   16.08   0
   2  -8   2  167.64   16.40   0
  -3  -8   2  -16.13   14.34   0
   3  -8   2   -4.87   19.32   0
  -4  -8   2  154.94   15.03   0
   4  -8   2  165.41   19.57   0
  -5  -8   2  209.29   14.98   0
   5  -8  -2   91.30   17.14   0
  -6  -8   2   -4.91   11.72   0
  -6  -8  -2   15.60   12.40   0
   6  -8  -2    4.78   12.76   0
  -7  -8  -2   81.57   12.53   0
  -7  -8   2   99.86   12.63   0
   7  -8  -2   75.16   14.62   0
  -8  -8   2   73.29   17.38   0
   8  -8  -2   37.72   13.47   0
  -8  -8  -2   68.86   12.77   0
   9  -8  -2   36.79   13.29   0
  -9  -8  -2   23.20   12.28   0
  -9  -8   2   60.96   12.08   0
 -10  -8  -2   29.04   12.38   0
 -10  -8   2   12.73   12.21   0
 -11  -8   2  131.32   12.71   0
 -11  -8  -2  144.72   12.30   0
 -12  -8   2   10.14   10.81   0
 -12  -8  -2    4.01   11.71   0
 -13  -8   2   79.20   12.50   0
 -13  -8  -2   81.55   12.08   0
 -14  -8  -2    3.22   11.60   0
 -14  -8   2   -9.22   11.11   0
 -15  -8   2   99.22   12.76   0
 -15  -8  -2  107.16   11.82   0
 -16  -8   2   -3.33   12.20   0
 -16  -8  -2    7.25   11.80   0
   1  -9   2   15.35   15.03   0
  -1  -9   2   12.64   14.86   0
   2  -9   2 1032.93   24.60   0
  -2  -9   2 1433.68   24.10   0
   3  -9   2   24.30   14.30   0
  -3  -9   2   30.09   13.95   0
  -4  -9   2   13.83   13.29   0
   4  -9   2   18.70   13.95   0
   5  -9   2  265.16   26.93   0
  -5  -9   2  377.59   14.71   0
   5  -9  -2  393.89   27.02   0
   5  -9   2  218.75   24.14   0
  -6  -9  -2   14.24   11.20   0
   6  -9  -2   19.07   19.49   0
  -6  -9   2   20.55   11.64   0
   7  -9  -2   58.87   18.98   0
  -7  -9   2   56.13   16.37   0
  -7  -9  -2   61.31   11.76   0
   8  -9  -2   37.38   17.52   0
  -8  -9   2   44.29   11.76   0
  -8  -9  -2    8.77   12.18   0
  -9  -9   2   15.32   12.16   0
  -9  -9  -2   14.52   11.34   0
 -10  -9   2    1.92   10.97   0
 -10  -9  -2    8.18   11.66   0
 -11  -9  -2   53.70   12.21   0
 -11  -9   2   56.67   12.26   0
 -12  -9  -2   75.75   12.30   0
 -12  -9   2   70.08   12.89   0
 -13  -9   2   -9.86   11.79   0
 -13  -9  -2   11.90   11.21   0
 -14  -9   2    9.59   10.82   0
 -14  -9  -2    7.09   10.71   0
 -15  -9   2    5.45   12.23   0
 -15  -9  -2   15.56   16.35   0
 -16  -9   2   11.40   12.11   0
 -16  -9  -2    2.42   11.91   0
   0 -10   2   13.77   14.43   0
  -1 -10   2   80.89   14.93   0
   1 -10   2   91.96   15.29   0
   2 -10   2   74.05   13.96   0
  -2 -10   2   90.54   14.62   0
  -3 -10   2  105.74   14.08   0
   3 -10   2   97.52   15.15   0
   4 -10   2  693.32   28.55   0
  -4 -10   2  699.44   17.30   0
  -5 -10   2  229.16   12.95   0
   5 -10   2  203.81   19.85   0
   6 -10  -2    6.10   18.78   0
  -6 -10   2    4.18   11.38   0
  -6 -10  -2    5.48   11.68   0
  -7 -10  -2  141.62   13.11   0
   7 -10  -2  152.35   20.71   0
  -7 -10   2  133.31   12.40   0
   8 -10  -2    0.40   12.07   0
  -8 -10   2   16.39   11.41   0
  -8 -10  -2   -0.81   16.60   0
  -9 -10  -2   29.54   11.50   0
  -9 -10   2   35.72   12.03   0
 -10 -10  -2   83.64   12.11   0
 -10 -10   2   55.91   11.85   0
 -11 -10   2  406.42   14.44   0
 -11 -10  -2  358.54   14.60   0
 -12 -10  -2   30.67   12.19   0
 -13 -10  -2   79.70   11.64   0
 -14 -10  -2   10.86   11.15   0
 -14 -10   2   20.11   16.73   0
 -15 -10  -2   35.85   12.15   0
 -15 -10   2    7.86   16.84   0
  -1 -11   2   27.21   13.12   0
   1 -11   2   17.23   18.85   0
  -2 -11   2  298.72   14.90   0
   2 -11   2  363.08   16.91   0
   3 -11   2  306.47   16.30   0
  -3 -11   2  324.50   14.64   0
  -4 -11   2  235.37   18.44   0
   4 -11   2  250.78   17.50   0
   5 -11   2   76.54   19.78   0
  -5 -11   2   73.22   12.70   0
  -6 -11  -2   33.64   15.78   0
  -6 -11   2   32.59   12.43   0
   6 -11  -2   29.52   13.47   0
  -7 -11  -2   90.87   12.33   0
  -7 -11   2   88.27   12.37   0
   7 -11  -2   93.77   19.45   0
  -8 -11  -2   16.87   11.46   0
  -8 -11   2   36.12   11.64   0
   8 -11  -2   15.55   18.16   0
  -9 -11   2    4.44   11.47   0
  -9 -11  -2   14.80   11.58   0
 -10 -11   2   93.31   12.46   0
 -10 -11  -2  106.45   12.41   0
 -11 -11  -2   38.79   12.10   0
 -12 -11  -2    3.43   11.69   0
 -13 -11  -2   25.81   11.06   0
 -13 -11   2    7.38   12.19   0
 -14 -11   2   11.56   11.60   0
 -14 -11  -2    8.96   11.78   0
 -15 -11  -2   44.03   12.09   0
 -15 -11   2   13.38   11.22   0
   0 -12   2    3.15   11.86   0
  -1 -12   2   14.64   12.51   0
   1 -12   2   21.47   12.17   0
  -2 -12   2   47.42   12.40   0
   2 -12   2   43.15   12.31   0
  -3 -12   2   23.71   11.22   0
   3 -12   2   -2.66   12.05   0
  -4 -12   2   51.94   12.01   0
   4 -12   2   50.07   13.12   0
   5 -12   2    3.58   11.90   0
  -5 -12  -2    8.50   11.58   0
  -5 -12   2    3.88   12.16   0
  -6 -12  -2   20.25   11.98   0
  -6 -12   2   16.51   11.73   0
   6 -12   2    6.76   12.55   0
   6 -12   2    7.66   19.52   0
   6 -12  -2    7.32   13.02   0
  -7 -12  -2   62.01   11.55   0
   7 -12  -2   51.00   14.06   0
  -7 -12   2   74.76   11.81   0
  -8 -12   2   -8.86   10.87   0
   8 -12  -2    1.40   12.78   0
   8 -12  -2    5.21   21.92   0
  -8 -12  -2   -2.12   11.05   0
  -9 -12  -2   19.03   11.49   0
  -9 -12   2   20.30   11.18   0
 -10 -12   2   48.21   11.44   0
 -10 -12  -2   53.71   12.02   0
 -11 -12  -2  331.12   14.02   0
 -12 -12  -2   97.07   11.93   0
 -12 -12   2   76.37   11.89   0
 -13 -12  -2    8.25   11.78   0
 -13 -12   2   17.43   11.51   0
 -14 -12  -2   -4.47   11.62   0
 -14 -12   2   -5.38   11.92   0
 -15 -12   2    0.18   12.03   0
 -15 -12  -2   18.35   12.21   0
   1 -13   2  988.36   20.80   0
  -1 -13   2  980.70   18.89   0
   2 -13   2   25.33   11.77   0
  -2 -13   2   22.71   11.39   0
  -3 -13   2   47.45   16.80   0
   3 -13   2   48.95   12.76   0
  -4 -13   2   15.76   11.96   0
   4 -13   2   20.51   17.37   0
  -5 -13  -2  185.60   13.16   0
   5 -13   2  110.66   14.23   0
  -5 -13   2  186.56   14.35   0
  -6 -13   2   10.30   11.34   0
  -6 -13  -2    9.54   11.73   0
   6 -13   2   10.80   12.74   0
  -7 -13  -2   41.79   11.67   0
   7 -13  -2   45.64   13.93   0
  -7 -13   2   68.44   16.24   0
   8 -13  -2    0.56   17.06   0
  -8 -13  -2   -3.81   10.94   0
  -8 -13   2   -2.45   11.60   0
   8 -13  -2    1.68   17.13   0
  -9 -13  -2    7.12   11.79   0
  -9 -13   2   -8.57   11.60   0
 -10 -13  -2   41.83   12.01   0
 -10 -13   2   62.61   10.89   0
 -11 -13  -2   -5.86   10.95   0
 -12 -13  -2   29.09   11.81   0
 -12 -13   2    5.37   12.08   0
 -13 -13  -2   20.31   11.42   0
 -13 -13   2   11.09   12.00   0
 -14 -13  -2   -0.21   12.41   0
 -14 -13   2   -3.05   11.99   0
   0 -14   2  123.98   17.90   0
  -1 -14   2   -0.42   11.60   0
   1 -14   2    6.21   11.92   0
  -2 -14   2   19.60   16.92   0
   2 -14   2   13.94   12.43   0
  -3 -14   2   38.10   13.03   0
   3 -14   2   32.06   11.86   0
  -4 -14  -2   14.21   12.25   0
   4 -14   2    9.06   12.09   0
  -4 -14   2    5.08   12.26   0
   5 -14   2   72.25   14.46   0
  -5 -14  -2  131.11   13.47   0
  -5 -14   2  104.07   12.91   0
   6 -14   2   55.84   14.44   0
  -6 -14  -2   79.07   11.78   0
  -6 -14   2   63.23   12.27   0
   7 -14  -2   10.39   13.34   0
   7 -14  -2    9.38   18.38   0
  -7 -14   2   11.92   11.41   0
   8 -14  -2   25.26   17.47   0
   8 -14  -2   11.11   12.51   0
  -8 -14   2    7.55   11.49   0
  -9 -14  -2    9.11   10.99   0
  -9 -14   2    7.03   10.60   0
 -10 -14  -2   14.98   10.63   0
 -10 -14   2   19.04   10.98   0
 -11 -14  -2   55.29   11.91   0
 -12 -14  -2   16.64   12.08   0
 -13 -14   2   -2.66   11.56   0
 -13 -14  -2   -5.22   11.92   0
 -14 -14  -2   -3.24   12.53   0
 -14 -14   2  -16.43   11.85   0
   1 -15   2  385.13   16.37   0
  -1 -15   2  398.46   14.79   0
   2 -15   2   16.21   12.25   0
  -2 -15   2   34.68   10.87   0
  -3 -15  -2  579.36   16.64   0
   3 -15   2  582.96   17.56   0
  -3 -15   2  538.59   16.75   0
  -4 -15   2   11.12   12.32   0
  -4 -15  -2   13.27   12.07   0
   4 -15   2   15.84   11.97   0
  -5 -15   2  123.35   12.58   0
  -5 -15  -2  109.40   12.59   0
   5 -15   2  112.19   15.09   0
   6 -15   2   -2.16   12.05   0
  -6 -15   2   -7.28   11.41   0
   6 -15  -2    2.83   12.26   0
  -6 -15  -2    7.15   11.96   0
  -7 -15  -2   62.92   12.40   0
   7 -15  -2   29.02   12.92   0
   7 -15  -2   78.17   14.04   0
  -7 -15   2   81.49   11.79   0
  -8 -15  -2    9.71   10.67   0
   8 -15  -2    4.78   17.98   0
   8 -15  -2    8.05   16.87   0
  -9 -15   2   28.23   10.98   0
 -10 -15   2   -5.60   10.85   0
 -13 -15  -2    8.98   11.81   0
 -13 -15   2   16.68   12.02   0
   0 -16   2   43.99   11.82   0
  -1 -16   2    4.68   11.39   0
   1 -16   2    5.27   12.05   0
  -1 -16  -2   12.32   11.53   0
  -2 -16   2   25.04   11.30   0
   2 -16   2   -0.06   12.31   0
  -2 -16  -2    9.54   11.71   0
  -3 -16   2   39.77   11.40   0
   3 -16   2   81.14   13.28   0
  -3 -16  -2   89.98   12.25   0
  -4 -16  -2   11.13   11.62   0
   4 -16   2   15.63   12.76   0
  -4 -16   2   31.08   11.74   0
   4 -16  -2   10.39   12.53   0
   5 -16  -2   13.54   17.34   0
  -5 -16  -2    6.06   11.89   0
  -5 -16   2   -1.08   11.58   0
   5 -16   2    4.80   12.70   0
  -6 -16  -2   -2.35   12.18   0
  -6 -16   2   23.16   11.97   0
   6 -16   2    1.12   11.55   0
   6 -16  -2   -3.15   11.68   0
   7 -16  -2   20.00   12.09   0
  -7 -16  -2   43.07   11.20   0
   7 -16  -2   27.63   12.53   0
   7 -16   2   26.10   23.33   0
  -7 -16   2   43.53   11.79   0
   7 -16   2   26.47   19.99   0
  -8 -16  -2    0.79   10.69   0
   8 -16  -2    0.53   17.55   0
  -8 -16   2    6.63   11.78   0
   8 -16  -2    0.84   12.23   0
  -9 -16  -2   -7.00   11.53   0
 -10 -16   2   -4.21   11.10   0
 -11 -16   2   -8.67   11.26   0
   1 -17  -2  319.46   14.89   0
   1 -17   2  306.52   15.09   0
  -1 -17   2  325.93   14.59   0
  -1 -17  -2  298.02   18.41   0
  -2 -17   2   26.09   11.08   0
  -2 -17  -2    2.42   11.23   0
   2 -17   2    5.09   12.04   0
   2 -17  -2    7.13   11.60   0
  -3 -17  -2  344.63   13.69   0
   3 -17   2  343.00   16.93   0
   3 -17  -2  249.28   14.48   0
  -3 -17   2  339.53   14.42   0
  -4 -17  -2    8.17   11.14   0
  -4 -17   2   10.04   10.82   0
   4 -17  -2   13.09   12.00   0
   4 -17   2    6.38   13.00   0
   5 -17  -2  161.19   14.75   0
  -5 -17   2  111.23   12.77   0
   5 -17   2  184.17   18.55   0
  -6 -17  -2   26.52   11.95   0
   6 -17   2   27.50   12.83   0
  -6 -17   2   55.65   12.10   0
   6 -17  -2   28.52   16.93   0
   7 -17  -2   18.72   12.60   0
  -7 -17  -2   35.93   11.05   0
   7 -17   2   11.85   12.85   0
   7 -17   2   14.55   18.62   0
   7 -17  -2   15.64   12.30   0
   8 -17  -2    1.01   12.47   0
  -8 -17   2   -4.81   11.10   0
   8 -17  -2    2.85   16.90   0
  -9 -17  -2   36.18   11.46   0
 -10 -17  -2   -3.27   10.99   0
 -11 -17   2   21.95   11.26   0
 -11 -17  -2   15.18   11.38   0
   0 -18   2    8.09   16.44   0
   0 -18  -2   -0.62   12.77   0
   1 -18   2    6.46   12.62   0
  -1 -18   2   -3.63   12.29   0
  -1 -18  -2    6.15   12.42   0
   1 -18  -2   14.15   12.44   0
  -2 -18   2   13.02   11.37   0
   2 -18  -2    8.10   11.11   0
   2 -18   2   -1.07   12.11   0
  -2 -18  -2    4.83   11.41   0
  -3 -18   2   -7.35   14.81   0
   3 -18  -2   -4.09   16.32   0
   3 -18   2    7.69   16.79   0
  -3 -18  -2   17.54   11.71   0
   4 -18  -2   35.11   12.47   0
   4 -18   2   43.61   12.26   0
  -4 -18   2   36.34   12.14   0
   5 -18  -2   -2.67   11.68   0
  -5 -18   2   13.53   11.28   0
  -5 -18  -2   -2.09   11.73   0
   5 -18   2    7.74   12.16   0
   6 -18   2    1.44   12.01   0
  -6 -18   2   -0.13   11.50   0
   6 -18  -2   -2.87   12.10   0
  -7 -18   2   15.78   11.56   0
   7 -18  -2   13.30   17.54   0
   7 -18   2    9.84   12.96   0
   7 -18  -2    7.50   13.39   0
   7 -18   2   11.86   18.43   0
  -7 -18  -2   25.25   11.43   0
   8 -18  -2    1.24   12.20   0
  -8 -18  -2  -13.74   11.79   0
  -8 -18   2    6.59   11.65   0
   8 -18  -2    4.55   12.27   0
  -9 -18   2    3.38   11.24   0
 -11 -18  -2    5.73   11.74   0
 -11 -18   2    3.99   11.57   0
  -1 -19  -2   57.48   12.79   0
   1 -19   2   56.08   11.93   0
   1 -19  -2   87.61   12.40   0
  -1 -19   2  103.63   12.45   0
   2 -19  -2   16.27   11.94   0
  -2 -19  -2    9.73   11.70   0
   2 -19   2   16.84   12.31   0
  -2 -19   2   12.34   10.55   0
   3 -19   2  120.79   13.50   0
  -3 -19  -2  139.43   12.50   0
  -3 -19   2  132.89   12.47   0
   3 -19  -2  101.31   13.35   0
   4 -19   2   12.17   12.30   0
   4 -19  -2    6.48   11.43   0
  -4 -19   2    9.66   11.28   0
  -4 -19  -2   17.14   11.07   0
  -5 -19   2   77.90   11.67   0
   5 -19  -2   62.88   12.91   0
  -5 -19  -2   46.30   11.86   0
   5 -19   2   58.83   12.95   0
   6 -19  -2    7.69   12.06   0
  -6 -19  -2   14.67   11.98   0
   6 -19   2   10.09   12.19   0
  -6 -19   2   15.80   11.26   0
   7 -19   2   22.61   13.65   0
   7 -19  -2   32.26   13.11   0
  -7 -19  -2   52.41   12.19   0
  -7 -19   2   52.43   12.77   0
   7 -19  -2   22.69   13.06   0
   7 -19   2   45.04   18.49   0
   8 -19  -2    3.08   17.48   0
  -8 -19   2  -14.20   12.17   0
   8 -19  -2   -0.95   13.23   0
  -9 -19  -2   -6.77   11.79   0
  -9 -19   2   15.67   11.44   0
   0 -20   2   68.31   12.70   0
   0 -20  -2   53.25   11.90   0
  -1 -20  -2   49.61   11.42   0
   1 -20  -2   41.90   12.34   0
   1 -20   2   33.24   11.92   0
  -1 -20   2   47.61   16.59   0
  -2 -20   2   83.71   12.38   0
   2 -20   2   63.91   12.43   0
   2 -20  -2   64.88   12.87   0
  -2 -20  -2   92.77   11.91   0
   3 -20  -2   27.89   11.99   0
   3 -20   2   30.23   12.57   0
  -4 -20   2   -2.09   11.34   0
   4 -20   2   -1.83   12.15   0
  -4 -20  -2   -2.81   11.09   0
   4 -20  -2   -4.95   16.49   0
  -5 -20  -2   -8.60   11.66   0
   5 -20  -2    8.86   12.23   0
   5 -20   2    9.51   12.85   0
  -5 -20   2   24.20   11.61   0
  -6 -20  -2   -2.51   11.76   0
  -6 -20   2   10.91   10.84   0
   6 -20  -2    1.08   11.96   0
   6 -20   2   -1.21   17.14   0
  -7 -20  -2    9.85   11.81   0
   7 -20  -2    4.02   12.99   0
   7 -20  -2   -3.62   12.55   0
   7 -20   2    1.60   12.51   0
  -8 -20   2   13.65   12.15   0
   8 -20  -2    3.90   12.83   0
   8 -20  -2    6.51   18.16   0
  -8 -20  -2   13.58   11.70   0
   1 -21   2   18.01   12.48   0
  -1 -21  -2   38.10   12.06   0
  -1 -21   2   21.21   12.16   0
   1 -21  -2   40.69   11.94   0
  -2 -21  -2   22.94   11.29   0
  -2 -21   2   24.54   11.06   0
   2 -21   2    9.30   11.84   0
   2 -21  -2   12.04   10.81   0
  -3 -21  -2   73.59   12.15   0
  -3 -21   2   94.88   12.71   0
   3 -21   2   60.81   13.58   0
   3 -21  -2   81.61   13.14   0
   4 -21   2   12.09   12.95   0
   4 -21  -2   14.03   17.35   0
  -4 -21   2   13.40   11.39   0
   5 -21  -2   32.87   13.06   0
   5 -21   2   30.44   13.41   0
  -5 -21   2   30.03   11.95   0
  -5 -21  -2   32.33   12.47   0
   6 -21  -2   12.76   17.60   0
  -6 -21   2   -5.28   11.46   0
   6 -21   2   -2.07   12.71   0
   7 -21  -2   36.74   12.85   0
   7 -21   2   18.43   14.21   0
  -7 -21   2   52.71   12.22   0
   7 -21  -2   26.41   13.36   0
   8 -21  -2   -0.59   13.10   0
   8 -21  -2   -0.17   12.87   0
   0 -22   2   -1.61   11.77   0
   0 -22  -2   10.93   11.46   0
  -1 -22   2   40.79   12.63   0
   1 -22  -2   39.38   12.51   0
   1 -22   2   17.21   11.78   0
  -1 -22  -2   10.47   11.80   0
  -2 -22   2   14.47   12.42   0
   2 -22  -2    4.90   12.19   0
  -2 -22  -2   14.21   11.99   0
   2 -22   2    8.21   11.63   0
  -3 -22   2    8.82   11.17   0
   3 -22   2   -2.00   12.19   0
   3 -22  -2   10.04   12.23   0
  -3 -22  -2   -3.58   11.61   0
   4 -22  -2    4.42   17.15   0
  -4 -22   2    5.66   10.93   0
   4 -22   2    8.62   12.26   0
  -4 -22  -2    1.91   12.48   0
  -5 -22   2   12.79   11.99   0
   5 -22   2   11.36   12.43   0
   5 -22  -2   23.79   12.52   0
   6 -22  -2   -1.70   12.68   0
   6 -22   2    5.16   12.63   0
  -6 -22   2   14.14   11.72   0
  -6 -22  -2   -3.74   11.12   0
  -1 -23   2   -0.61   12.12   0
   1 -23  -2   13.75   12.28   0
   1 -23   2   -2.10   11.77   0
  -1 -23  -2    7.92   12.24   0
   2 -23  -2    9.13   11.87   0
  -2 -23   2    3.00   12.11   0
   2 -23   2    9.36   12.10   0
   3 -23  -2   37.38   12.84   0
  -3 -23   2   49.36   11.85   0
   3 -23   2   58.90   13.07   0
   4 -23   2   -5.24   12.37   0
   4 -23  -2   -0.34   12.45   0
  -4 -23   2   11.48   12.27   0
  -4 -23  -2    7.99   11.42   0
   1  -1  -3 2392.54   48.86   0
  -1  -1   3 2440.12   45.42   0
   1   1  -3 2547.24   45.38   0
  -1   1  -3 2436.86   58.92   0
  -1   1   3 2403.15   49.77   0
  -2   1   3 1071.76   35.26   0
   2  -1  -3 1105.26   34.84   0
  -2  -1   3 1091.16   30.87   0
   2   1  -3 1064.06   29.94   0
  -3   1   3   47.90   19.37   0
   3  -1  -3   55.09   18.85   0
  -3  -1   3   48.90   19.69   0
   3   1  -3   43.13   19.18   0
   4  -1  -3 1861.53   33.76   0
  -4   1   3 1869.29   33.94   0
  -4  -1   3 1913.62   30.99   0
   4   1  -3 1883.52   30.53   0
  -5  -1   3  419.93   17.79   0
   5   1  -3  435.39   17.87   0
  -5   1   3  432.83   19.39   0
   5  -1  -3  439.30   19.01   0
   6  -1  -3  361.37   18.04   0
  -6   1  -3  275.11   17.52   0
  -6   1   3  382.40   18.14   0
   6   1  -3  373.14   17.09   0
  -6  -1   3  340.93   17.56   0
  -7   1   3  920.99   23.05   0
   7   1  -3  905.20   21.68   0
  -7  -1   3  922.58   21.75   0
  -7   1  -3  892.10   23.37   0
   7  -1  -3  989.05   27.09   0
  -7  -1  -3  914.71   21.66   0
   8   1  -3   74.62   13.40   0
  -8  -1  -3   42.36   13.24   0
   8  -1  -3   50.31   12.05   0
  -8   1  -3   60.47   13.27   0
  -8  -1   3   52.01   13.43   0
  -8   1   3   49.69   12.19   0
  -9   1  -3   36.43   11.85   0
  -9  -1   3   32.95   11.95   0
  -9  -1  -3   32.03   11.93   0
   9  -1  -3   42.22   12.49   0
  -9   1   3   32.54   11.96   0
 -10  -1  -3   27.99   12.27   0
 -10   1  -3   21.71   11.89   0
 -10  -1   3   16.68   16.12   0
 -10   1   3   33.00   12.90   0
 -11   1  -3    3.30   11.44   0
 -11  -1   3   20.18   12.23   0
 -11  -1  -3    7.49   11.96   0
 -11   1   3    5.16   12.18   0
 -12  -1   3   49.01   12.88   0
 -12  -1  -3   44.43   11.86   0
 -12   1   3   53.80   11.99   0
 -12   1  -3   57.55   12.32   0
 -13   1   3   15.21   12.44   0
 -13   1  -3   20.01   11.17   0
 -13  -1   3   21.75   11.73   0
 -13  -1  -3   21.13   11.83   0
 -14  -1   3   62.09   11.87   0
 -14   1  -3   64.71   12.01   0
 -14  -1  -3   54.31   12.00   0
 -14   1   3   62.44   12.17   0
 -15   1   3   40.54   11.75   0
 -15   1  -3   35.55   12.67   0
 -15  -1   3   23.59   12.17   0
 -15  -1  -3   36.00   11.99   0
 -16  -1   3   21.36   11.41   0
 -16   1   3   20.14   12.47   0
 -16  -1  -3   13.44   11.58   0
 -16   1  -3   13.52   11.81   0
 -17   1   3   -1.94   12.08   0
 -17  -1  -3    1.32   12.37   0
 -17   1  -3   -3.71   12.58   0
 -17  -1   3   10.48   11.86   0
   0   2  -3    1.64   17.81   0
   0  -2   3    1.88   18.26   0
  -1  -2   3  149.82   20.57   0
  -1   2  -3  144.29   24.03   0
   1  -2   3  110.60   23.35   0
   1   2  -3  144.43   20.30   0
   2   2  -3   23.38   16.67   0
  -2   2  -3   16.02   22.70   0
  -2   2   3   16.24   22.74   0
  -2  -2   3   19.13   17.08   0
   2  -2  -3   15.65   21.03   0
   3  -2  -3  408.33   23.88   0
  -3   2   3  459.78   25.35   0
  -3  -2   3  474.65   20.90   0
   3   2  -3  317.54   19.54   0
  -4  -2   3 1733.92   29.30   0
   4   2  -3 1681.16   28.47   0
  -4   2   3 1775.68   35.45   0
   4  -2  -3 1790.82   35.36   0
  -5  -2   3   50.38   14.13   0
   5  -2  -3   49.54   14.94   0
  -5   2  -3   41.28   15.22   0
   5   2  -3   44.19   14.30   0
  -5   2   3   56.91   15.54   0
  -6   2  -3  181.42   16.85   0
  -6   2   3  188.07   16.95   0
   6   2  -3  197.50   15.80   0
  -6  -2   3  192.58   16.10   0
   6  -2  -3  196.42   16.58   0
  -7  -2  -3  174.84   15.47   0
   7  -2  -3  187.41   16.62   0
  -7   2   3  179.36   16.48   0
  -7  -2   3  184.60   15.55   0
   7   2  -3  172.35   15.56   0
  -7   2  -3  113.05   15.34   0
  -8   2   3   12.38   12.02   0
  -8  -2  -3   12.23   12.53   0
  -8  -2   3    9.80   12.78   0
   8  -2  -3   23.68   12.12   0
  -8   2  -3    9.03   12.18   0
  -9  -2  -3  118.21   12.55   0
  -9   2  -3  121.23   18.14   0
  -9  -2   3   90.95   12.93   0
  -9   2   3  119.40   13.59   0
   9  -2  -3  113.19   12.84   0
 -10  -2   3   10.05   11.69   0
 -10  -2  -3   18.10   11.27   0
 -10   2  -3   22.31   11.96   0
 -10   2   3   28.79   12.08   0
 -11  -2   3   39.54   12.37   0
 -11  -2  -3   41.25   12.27   0
 -11   2   3   28.16   12.66   0
 -11   2  -3   42.97   11.86   0
 -12   2  -3    3.07   11.34   0
 -12  -2  -3   -0.79   11.63   0
 -12   2   3   -3.09   12.01   0
 -12  -2   3    6.51   11.81   0
 -13  -2  -3    1.51   12.24   0
 -13   2   3   25.78   17.02   0
 -13   2  -3   12.28   11.91   0
 -13  -2   3   11.07   11.66   0
 -14   2  -3    2.59   11.22   0
 -14   2   3    5.83   11.27   0
 -14  -2  -3    5.39   10.49   0
 -14  -2   3   10.88   11.36   0
 -15  -2   3    7.54   10.67   0
 -15   2   3   -4.73   11.05   0
 -15  -2  -3    8.64   11.49   0
 -15   2  -3    6.19   11.09   0
 -16  -2  -3   -9.93   11.36   0
 -16  -2   3   -4.84   11.74   0
 -16   2   3   -1.69   12.07   0
 -16   2  -3    1.22   12.14   0
 -17   2  -3   -3.48   11.94   0
 -17   2   3   -2.91   12.52   0
 -17  -2   3  -10.58   12.28   0
 -17  -2  -3   -9.13   11.95   0
  -1  -3   3 2935.31   43.41   0
  -1   3  -3 2692.64   54.44   0
   1  -3   3 3038.09   62.31   0
   1   3  -3 3035.64   43.33   0
  -2   3  -3   19.36   19.09   0
   2   3  -3   19.83   15.53   0
  -2  -3   3   25.42   15.79   0
   2  -3   3   13.27   20.96   0
   3   3  -3 2644.91   33.94   0
   3  -3  -3 2685.25   46.62   0
  -3   3  -3 2574.22   83.84   0
  -3   3   3 2356.71   45.49   0
  -3  -3   3 2364.28   32.65   0
  -4  -3   3   84.46   15.25   0
  -4   3   3   72.75   17.91   0
   4  -3  -3   80.03   17.17   0
   4   3  -3   80.34   20.97   0
   5   3  -3   34.37   13.88   0
   5  -3  -3   26.85   14.77   0
  -5   3  -3   42.80   15.50   0
  -5   3   3   54.22   16.23   0
  -5  -3   3   51.50   14.31   0
  -6   3  -3  239.44   18.83   0
  -6   3   3  228.87   18.57   0
  -6  -3   3  255.21   16.58   0
   6   3  -3  263.37   16.50   0
   6  -3  -3  127.38   15.87   0
  -7   3   3  189.68   16.32   0
  -7  -3  -3  239.99   15.43   0
   7  -3  -3  223.78   16.41   0
  -7  -3   3  219.89   16.11   0
  -7   3  -3  228.21   18.06   0
   7   3  -3  233.23   15.52   0
  -8  -3   3   12.27   12.40   0
   8  -3  -3   22.41   12.25   0
  -8  -3  -3   28.56   12.29   0
  -8   3   3   20.38   12.97   0
  -8   3  -3   20.10   13.25   0
   9  -3  -3  117.89   13.55   0
  -9   3  -3   66.69   12.84   0
  -9  -3  -3   93.04   12.18   0
  -9   3   3   94.78   13.14   0
  -9  -3   3  116.57   12.28   0
 -10  -3  -3   60.45   12.12   0
 -10   3  -3   53.92   12.90   0
 -10   3   3   57.03   12.79   0
 -10  -3   3   38.82   11.40   0
 -11   3   3   -0.46   11.98   0
 -11  -3   3    5.66   11.44   0
 -11  -3  -3    7.23   10.60   0
 -11   3  -3   -3.02   11.04   0
 -12  -3   3   69.24   12.34   0
 -12  -3  -3   70.17   12.62   0
 -12   3  -3   68.57   12.56   0
 -12   3   3   73.68   18.00   0
 -13   3   3    7.85   11.83   0
 -13   3  -3    4.19   11.48   0
 -13  -3   3   -0.39   17.02   0
 -13  -3  -3   11.18   11.68   0
 -14   3   3   17.71   12.20   0
 -14  -3  -3   12.17   11.47   0
 -14   3  -3   10.56   11.82   0
 -14  -3   3   12.20   16.37   0
 -15  -3   3    5.67   15.73   0
 -15   3  -3   11.18   11.96   0
 -15   3   3   -2.33   12.40   0
 -15  -3  -3    1.96   10.54   0
 -16   3  -3    5.93   12.37   0
 -16  -3  -3   11.87   11.70   0
 -16  -3   3    2.54   11.54   0
 -16   3   3   -2.50   12.36   0
 -17   3  -3    8.85   11.96   0
 -17  -3   3    5.62   11.75   0
 -17  -3  -3    3.53   11.77   0
 -17   3   3    4.37   12.57   0
   0   4  -3  116.30   20.66   0
   0  -4   3  111.91   20.32   0
  -1   4  -3  152.01   20.63   0
   1  -4   3  241.74   22.56   0
  -1  -4   3  183.53   20.51   0
   1   4  -3  261.14   21.16   0
  -2   4  -3  442.79   28.66   0
  -2  -4   3  488.49   19.48   0
   2   4  -3  503.33   24.35   0
   2  -4   3  335.94   26.82   0
   3   4  -3  253.45   16.72   0
  -3  -4   3  277.47   17.09   0
   3  -4  -3  254.70   21.83   0
  -4  -4   3    2.70   13.88   0
   4   4  -3   -5.45   13.78   0
   4  -4  -3   -1.60   22.44   0
  -5   4  -3   76.36   19.06   0
   5  -4  -3   98.18   16.07   0
   5   4  -3  108.62   14.72   0
  -5  -4   3  113.94   14.42   0
  -5   4   3   98.27   18.03   0
   6  -4  -3  295.28   18.51   0
   6   4  -3  286.59   16.13   0
  -6   4  -3  280.98   23.10   0
  -6   4   3  277.66   19.24   0
  -6  -4   3  304.18   17.15   0
  -7   4  -3    6.36   14.71   0
  -7  -4  -3    2.27   13.47   0
  -7   4   3    7.42   14.71   0
  -7  -4   3   14.00   20.02   0
   7  -4  -3    6.19   13.30   0
  -8   4  -3  131.18   16.08   0
  -8  -4  -3  134.87   17.58   0
  -8  -4   3  129.00   12.90   0
  -8   4   3  138.10   15.83   0
   8  -4  -3  128.19   14.80   0
   9  -4  -3   40.65   12.43   0
  -9   4  -3   79.38   14.01   0
  -9  -4  -3   76.13   11.97   0
  -9   4   3   75.53   13.30   0
  -9  -4   3   84.42   11.87   0
 -10   4  -3   19.64   12.26   0
 -10  -4  -3   18.21   11.43   0
  10  -4  -3   14.87   12.18   0
 -10  -4   3   21.06   11.48   0
 -10   4   3    9.28   12.10   0
 -11  -4   3   64.57   11.54   0
 -11   4  -3   78.11   13.65   0
 -11  -4  -3   90.18   12.17   0
 -11   4   3   70.46   18.34   0
 -12  -4   3   12.87   11.35   0
 -12   4   3   -5.00   12.48   0
 -12  -4  -3   -1.65   11.68   0
 -12   4  -3   -3.93   12.66   0
 -13  -4   3   30.89   12.71   0
 -13  -4  -3   48.83   11.87   0
 -13   4  -3   50.61   17.92   0
 -13   4   3   48.82   13.12   0
 -14   4  -3   30.52   13.08   0
 -14   4   3   28.77   17.33   0
 -14  -4   3   35.58   15.92   0
 -14  -4  -3   18.82   16.04   0
 -15   4   3   11.61   13.27   0
 -15   4  -3    7.70   12.33   0
 -15  -4  -3    6.88   11.29   0
 -15  -4   3   22.70   11.59   0
 -16   4   3   10.70   11.95   0
 -16  -4   3    8.61   11.32   0
 -16  -4  -3   15.17   11.87   0
 -16   4  -3   -3.94   11.79   0
 -17   4  -3    8.43   12.53   0
 -17  -4   3   -8.84   11.80   0
 -17  -4  -3    3.59   12.07   0
 -17   4   3    5.66   12.60   0
   1   5  -3   -1.19   21.48   0
  -1  -5   3    6.32   15.07   0
  -1   5  -3    7.03   15.37   0
   1  -5   3    6.98   16.13   0
  -2  -5   3   62.61   14.86   0
   2  -5   3   79.79   17.92   0
   2   5  -3  101.37   15.49   0
  -3  -5   3  556.21   18.75   0
   3  -5   3  570.47   41.01   0
   3   5  -3  546.09   18.73   0
   4  -5  -3  102.58   17.21   0
  -4  -5   3   93.97   14.36   0
   4   5  -3  110.28   14.04   0
  -5  -5   3   -1.64   14.40   0
   5  -5  -3    8.92   14.61   0
  -6   5   3  132.56   17.91   0
  -6  -5   3  136.98   15.15   0
   6  -5  -3  129.51   16.52   0
  -7   5   3   28.96   15.47   0
  -7  -5   3   37.39   13.41   0
   7  -5  -3   33.86   18.95   0
  -7   5  -3   19.16   14.93   0
  -8  -5  -3   60.10   12.58   0
  -8  -5   3   66.61   12.29   0
  -8   5  -3   68.45   20.72   0
   8  -5  -3   60.08   12.75   0
  -8   5   3   70.78   18.64   0
  -9   5   3    1.09   13.39   0
  -9  -5  -3    1.84   11.25   0
  -9  -5   3   11.98   11.12   0
  -9   5  -3    2.56   11.90   0
   9  -5  -3   -2.53   11.83   0
 -10  -5   3    9.89   11.57   0
 -10   5   3   17.04   12.70   0
 -10   5  -3   15.12   12.86   0
 -10  -5  -3   15.41   11.66   0
  10  -5  -3   17.10   12.41   0
 -11  -5   3   13.91   10.95   0
 -11   5  -3    1.46   12.56   0
 -11  -5  -3    3.09   11.51   0
 -11   5   3    0.87   13.44   0
 -12  -5   3   96.29   12.19   0
 -12   5   3   92.56   14.21   0
 -12  -5  -3   97.59   12.73   0
 -12   5  -3  100.11   14.41   0
 -13   5   3    8.72   12.62   0
 -13   5  -3   -0.57   12.07   0
 -13  -5   3   -9.05   11.16   0
 -13  -5  -3   -6.10   15.67   0
 -14   5   3   38.57   12.83   0
 -14   5  -3   49.20   13.21   0
 -14  -5   3   56.02   11.70   0
 -14  -5  -3   49.32   11.52   0
 -15   5  -3   -2.53   11.32   0
 -15   5   3   -0.87   12.46   0
 -15  -5   3   -1.15   11.29   0
 -15  -5  -3   12.24   11.36   0
 -16  -5   3   12.84   11.38   0
 -16   5   3    7.47   12.63   0
 -16  -5  -3   -0.01   12.16   0
 -16   5  -3    4.26   12.06   0
 -17  -5  -3    2.76   12.38   0
 -17   5   3    5.83   12.54   0
 -17   5  -3    2.43   13.17   0
 -17  -5   3   -7.99   12.20   0
   0  -6   3  243.90   18.08   0
  -1  -6   3   18.85   14.31   0
   1  -6   3   12.14   14.81   0
   2  -6   3  143.24   23.09   0
  -2  -6   3  125.18   14.74   0
  -3  -6   3  238.57   15.48   0
   3  -6   3  223.45   21.97   0
   4  -6  -3  206.46   20.37   0
  -4  -6   3  209.25   15.76   0
  -5  -6   3   51.32   15.16   0
   5  -6  -3   31.93   16.19   0
   6  -6  -3    3.02   14.63   0
  -6  -6   3    6.48   13.66   0
   7  -6  -3   18.37   13.73   0
  -7  -6   3   11.56   12.76   0
  -8  -6  -3  112.74   12.54   0
  -8  -6   3  102.24   12.26   0
   8  -6  -3   99.75   14.47   0
  -9   6  -3   32.65   14.26   0
  -9   6   3   34.77   13.34   0
  -9  -6  -3   74.98   16.76   0
   9  -6  -3   73.58   13.67   0
  -9  -6   3   89.84   17.36   0
 -10   6  -3   36.27   14.61   0
 -10  -6   3   35.26   11.60   0
 -10   6   3   40.81   14.02   0
  10  -6  -3   41.08   13.01   0
 -10  -6  -3   49.55   11.69   0
 -11  -6   3   19.02   11.95   0
 -11   6   3   12.97   13.96   0
 -11   6  -3   12.88   13.37   0
 -11  -6  -3   13.60   11.79   0
 -12   6  -3   44.95   13.96   0
 -12   6   3   69.07   14.05   0
 -12  -6  -3  121.89   12.63   0
 -12  -6   3   90.82   11.91   0
 -13  -6  -3  126.79   12.17   0
 -13   6   3  114.36   18.78   0
 -13   6  -3  104.08   15.50   0
 -13  -6   3  103.92   12.39   0
 -14  -6   3   -1.04   11.33   0
 -14   6   3    6.37   12.94   0
 -14  -6  -3   -2.19   11.19   0
 -14   6  -3    1.98   11.88   0
 -15  -6  -3   40.03   11.63   0
 -15   6  -3   18.67   13.06   0
 -15   6   3   33.93   13.07   0
 -15  -6   3   22.13   11.84   0
 -16   6  -3   17.09   17.87   0
 -16   6   3   18.69   13.82   0
 -16  -6  -3   20.48   10.85   0
 -16  -6   3   29.39   12.25   0
  -1  -7   3  378.96   17.35   0
   1  -7   3  368.60   19.41   0
  -2  -7   3   35.33   14.60   0
   2  -7   3   23.47   14.57   0
   3  -7   3 1129.52   33.22   0
  -3  -7   3 1348.71   23.87   0
  -4  -7   3   29.01   14.11   0
   4  -7   3   16.94   16.97   0
  -5  -7   3  772.51   19.20   0
   5  -7  -3  787.62   26.51   0
  -6  -7   3    8.22   12.74   0
   6  -7  -3   11.27   19.79   0
   7  -7  -3  312.10   18.74   0
  -7  -7   3  581.57   20.04   0
   8  -7  -3    3.46   12.59   0
  -8  -7  -3   -3.53   12.26   0
  -8  -7   3   -3.69   12.02   0
  -9  -7  -3   24.11   12.20   0
   9  -7  -3   36.88   16.84   0
  -9  -7   3   58.03   12.16   0
  10  -7  -3    7.23   17.40   0
 -10  -7   3    5.89   12.42   0
 -10  -7  -3   19.94   11.93   0
 -11  -7   3   28.87   11.54   0
 -11  -7  -3   13.63   11.31   0
 -12  -7   3   36.60   12.15   0
 -12  -7  -3   39.15   11.16   0
 -13  -7  -3    4.53   12.07   0
 -13  -7   3    2.68   10.60   0
 -14  -7  -3   12.75   11.02   0
 -15  -7   3   11.37   11.44   0
 -15  -7  -3   -6.43   11.60   0
 -16  -7   3   20.08   16.60   0
 -16  -7  -3   11.98   12.02   0
   0  -8   3    2.09   13.46   0
   1  -8   3   11.27   18.95   0
  -1  -8   3   -1.78   14.56   0
   2  -8   3   67.20   14.97   0
  -2  -8   3   77.28   14.87   0
  -3  -8   3   -7.87   14.47   0
   3  -8   3    7.44   14.58   0
  -4  -8   3   29.46   14.17   0
   4  -8   3   33.24   21.01   0
  -5  -8   3   52.55   12.90   0
   5  -8  -3   46.08   16.13   0
   6  -8  -3   20.95   19.01   0
  -6  -8   3    7.14   11.59   0
  -7  -8   3   38.35   12.04   0
   7  -8  -3   30.86   13.26   0
  -7  -8  -3   40.25   12.08   0
  -8  -8  -3   22.27   11.93   0
   8  -8  -3   -0.17   12.43   0
  -8  -8   3   -4.62   11.89   0
   9  -8  -3    3.07   11.59   0
  -9  -8  -3   -3.00   12.03   0
  -9  -8   3   -1.06   11.96   0
  10  -8  -3   -3.20   12.57   0
 -10  -8  -3   13.38   11.71   0
 -10  -8   3   -1.69   12.31   0
 -11  -8   3  184.31   12.80   0
 -11  -8  -3  190.28   12.46   0
 -12  -8  -3   12.42   10.39   0
 -12  -8   3   31.36   10.89   0
 -13  -8   3   15.18   10.87   0
 -13  -8  -3   -1.00   15.91   0
 -14  -8   3   -0.31   11.30   0
 -14  -8  -3   13.19   11.57   0
 -15  -8  -3    2.30   11.55   0
 -15  -8   3   13.20   11.60   0
 -16  -8  -3    4.52   11.82   0
 -16  -8   3   23.80   12.05   0
   1  -9   3  172.14   16.70   0
  -1  -9   3  164.43   16.17   0
  -2  -9   3   84.98   14.95   0
   2  -9   3   81.85   14.46   0
  -3  -9   3   18.25   13.90   0
   3  -9   3    6.22   13.93   0
   4  -9   3  142.28   22.78   0
  -4  -9   3  137.56   14.04   0
   5  -9  -3  620.83   23.96   0
  -5  -9   3  537.71   15.32   0
  -6  -9   3   23.43   11.64   0
   6  -9  -3   22.31   14.10   0
  -7  -9  -3   -1.39   11.69   0
   7  -9  -3    6.52   17.80   0
  -7  -9   3   -2.72   11.72   0
   8  -9  -3   13.54   16.91   0
  -8  -9  -3   27.11   11.84   0
  -8  -9   3   26.35   11.68   0
  -9  -9   3   18.86   11.25   0
   9  -9  -3   22.23   17.94   0
  -9  -9  -3   23.21   12.61   0
 -10  -9  -3   22.00   11.89   0
 -10  -9   3   32.33   11.92   0
 -11  -9  -3  100.13   12.27   0
 -11  -9   3   94.44   12.55   0
 -12  -9  -3   21.97   11.04   0
 -12  -9   3   27.47   11.26   0
 -13  -9   3   26.70   11.56   0
 -13  -9  -3   19.70   11.07   0
 -14  -9  -3   29.89   16.43   0
 -14  -9   3   37.90   10.90   0
 -15  -9  -3   -3.40   12.18   0
 -15  -9   3  -15.86   11.98   0
 -16  -9   3   10.42   11.57   0
 -16  -9  -3   12.08   12.45   0
   0 -10   3  124.21   14.79   0
   1 -10   3  152.34   15.35   0
  -1 -10   3  163.90   15.47   0
  -2 -10   3   19.30   13.82   0
   2 -10   3   22.40   12.80   0
  -3 -10   3  565.74   16.43   0
   3 -10   3  654.94   22.60   0
  -4 -10   3   -0.36   12.60   0
   4 -10   3    2.33   18.75   0
   5 -10   3  229.87   25.22   0
  -5 -10   3  227.60   13.52   0
  -6 -10   3  147.39   12.99   0
   6 -10  -3  158.00   21.14   0
  -7 -10  -3  106.69   12.76   0
  -7 -10   3   71.12   12.34   0
   7 -10  -3   75.97   14.11   0
  -8 -10   3  138.91   12.59   0
   8 -10  -3  130.82   15.66   0
  -8 -10  -3  133.08   12.84   0
  -9 -10   3  330.55   14.25   0
  -9 -10  -3  380.24   19.03   0
   9 -10  -3  269.50   21.62   0
 -10 -10   3   29.25   11.52   0
 -10 -10  -3   12.79   12.01   0
 -11 -10  -3   80.23   12.39   0
 -11 -10   3   66.08   12.49   0
 -12 -10  -3    4.79   11.89   0
 -13 -10  -3    7.34   10.71   0
 -14 -10  -3    7.88   11.74   0
 -14 -10   3   33.10   11.47   0
 -15 -10   3    5.20   11.30   0
 -15 -10  -3    3.16   12.23   0
   1 -11   3   99.07   13.19   0
  -1 -11   3  109.22   13.83   0
  -2 -11   3   27.33   13.43   0
   2 -11   3   28.92   12.42   0
   3 -11   3  611.38   23.32   0
  -3 -11   3  572.60   16.05   0
   4 -11   3   41.20   13.78   0
  -4 -11   3   29.39   12.86   0
   5 -11   3    8.06   12.74   0
  -5 -11   3   42.36   12.37   0
  -6 -11   3  268.09   14.24   0
   6 -11  -3  242.02   17.55   0
   7 -11  -3  100.31   14.61   0
  -7 -11   3   78.33   11.92   0
  -7 -11  -3  114.33   12.54   0
  -8 -11  -3   55.05   11.11   0
   8 -11  -3   53.27   14.43   0
  -8 -11   3   56.28   11.81   0
   9 -11  -3   46.66   15.15   0
  -9 -11   3   82.26   11.41   0
  -9 -11  -3   85.29   12.18   0
 -10 -11  -3   -3.14   11.86   0
 -10 -11   3   17.20   11.91   0
 -11 -11  -3   -4.51   10.98   0
 -12 -11  -3   22.01   11.96   0
 -12 -11   3    4.59   11.38   0
 -13 -11   3   39.03   11.76   0
 -13 -11  -3   37.44   11.45   0
 -14 -11   3   10.85   12.33   0
 -14 -11  -3  -11.25   11.35   0
 -15 -11  -3  -13.93   11.46   0
 -15 -11   3    5.74   12.15   0
   0 -12   3    9.71   11.87   0
  -1 -12   3   65.55   12.83   0
   1 -12   3   60.08   12.51   0
  -2 -12   3   11.37   12.41   0
   2 -12   3   40.13   12.73   0
   3 -12   3   55.81   17.30   0
  -3 -12   3   38.90   11.46   0
  -4 -12   3  206.57   13.14   0
   4 -12   3  208.76   16.40   0
  -5 -12   3   55.19   17.38   0
   5 -12   3   46.13   17.68   0
  -6 -12  -3  181.85   12.40   0
  -6 -12   3  176.84   13.25   0
   6 -12  -3  150.19   20.53   0
   7 -12  -3   52.67   14.04   0
  -7 -12  -3   89.20   11.29   0
  -7 -12   3   59.45   11.69   0
  -8 -12  -3    7.06   11.07   0
   8 -12  -3    4.06   12.43   0
  -8 -12   3   -0.44   10.49   0
  -9 -12  -3   35.02   11.95   0
  -9 -12   3   27.18   11.37   0
 -10 -12  -3   23.46   11.87   0
 -10 -12   3    4.06   11.28   0
 -11 -12   3  156.36   13.26   0
 -11 -12  -3  161.95   13.02   0
 -12 -12   3   -7.55   11.33   0
 -12 -12  -3   -9.68   12.01   0
 -13 -12   3   11.77   11.47   0
 -13 -12  -3    5.13   11.77   0
 -14 -12  -3   -2.22   11.68   0
 -14 -12   3    8.16   11.03   0
 -15 -12   3   25.21   12.69   0
 -15 -12  -3   -5.29   11.31   0
   1 -13   3  145.69   13.46   0
  -1 -13   3  153.18   13.22   0
  -2 -13   3   36.52   11.65   0
   2 -13   3   20.38   12.45   0
   3 -13   3   -1.51   16.42   0
  -3 -13   3   -5.96   11.69   0
   4 -13   3    1.77   11.74   0
  -4 -13   3   -3.81   12.35   0
   5 -13   3  115.89   19.09   0
  -5 -13   3  101.63   13.25   0
   6 -13   3   10.66   13.87   0
  -6 -13   3   14.51   11.64   0
  -6 -13  -3   27.32   11.93   0
  -7 -13  -3   19.39   11.32   0
   7 -13  -3   17.88   12.89   0
  -7 -13   3   20.69   10.93   0
  -8 -13   3   11.44   11.30   0
  -8 -13  -3   -9.47   11.38   0
   8 -13  -3    5.26   12.49   0
  -9 -13   3   -8.35   11.02   0
  -9 -13  -3    2.37   11.09   0
 -10 -13   3   22.32   12.15   0
 -10 -13  -3   31.75   11.07   0
 -11 -13   3   -5.75   10.77   0
 -11 -13  -3    9.23   11.85   0
 -12 -13   3   14.33   11.72   0
 -12 -13  -3    2.55   11.60   0
 -13 -13  -3    8.28   11.62   0
 -13 -13   3   -9.27   11.85   0
 -14 -13   3   20.51   12.34   0
 -14 -13  -3   -6.17   11.87   0
   0 -14   3   -4.77   11.38   0
  -1 -14   3    8.89   11.32   0
   1 -14   3    8.29   12.53   0
   2 -14   3   -2.37   12.27   0
  -2 -14   3   14.82   11.40   0
   3 -14   3   82.43   12.90   0
  -3 -14   3   91.90   12.19   0
  -4 -14   3  326.14   14.41   0
   4 -14   3  326.66   16.99   0
  -5 -14   3  167.79   12.54   0
  -5 -14  -3  156.78   12.30   0
   5 -14   3  158.06   15.46   0
   6 -14   3   70.43   15.31   0
  -6 -14  -3   88.61   12.04   0
  -6 -14   3   86.62   12.61   0
  -7 -14   3   60.16   11.73   0
   7 -14  -3   44.93   13.58   0
  -8 -14   3   11.72   11.32   0
   8 -14  -3    7.61   12.15   0
  -9 -14   3   87.56   12.30   0
 -10 -14   3   27.75   11.16   0
 -12 -14   3   10.08   11.18   0
 -13 -14  -3  -15.97   12.04   0
 -13 -14   3    7.01   12.02   0
 -14 -14  -3    7.90   12.26   0
 -14 -14   3    2.78   12.28   0
  -1 -15   3   43.37   12.05   0
   1 -15   3   41.75   12.89   0
   2 -15   3   50.83   13.33   0
  -2 -15   3   48.55   12.52   0
  -3 -15   3   71.80   17.95   0
   3 -15   3   79.62   12.11   0
   4 -15   3    7.37   11.30   0
  -4 -15   3    1.95   12.53   0
   5 -15   3    3.56   12.87   0
  -5 -15   3   -3.91   11.93   0
  -5 -15  -3    7.32   12.37   0
  -6 -15  -3    2.49   11.32   0
  -6 -15   3  -10.90   11.94   0
   6 -15   3   -2.33   16.94   0
  -7 -15   3   -8.98   12.21   0
   7 -15  -3    1.00   11.65   0
  -7 -15  -3    7.30   11.57   0
   8 -15  -3    6.65   17.48   0
  -8 -15  -3   -0.69   11.08   0
   8 -15  -3    7.94   12.41   0
  -9 -15  -3   18.64   10.90   0
  -9 -15   3    8.31   11.08   0
 -10 -15   3   13.31   11.20   0
 -12 -15   3   -3.86   11.99   0
 -13 -15   3   -1.36   11.95   0
 -13 -15  -3   12.86   16.46   0
   0 -16   3  219.60   14.26   0
  -1 -16   3    3.44   11.60   0
   1 -16   3   14.08   12.45   0
   2 -16   3  152.22   13.79   0
  -2 -16   3  168.59   13.36   0
  -3 -16   3   28.08   11.04   0
   3 -16   3    9.89   12.65   0
   4 -16   3   30.02   12.95   0
  -4 -16  -3   40.58   12.22   0
  -4 -16   3   34.23   11.91   0
  -5 -16  -3   63.46   11.97   0
  -5 -16   3   48.35   12.10   0
   5 -16   3   60.70   13.29   0
  -6 -16   3   70.97   12.51   0
   6 -16   3   69.14   14.11   0
  -6 -16  -3   77.73   12.51   0
  -7 -16   3  103.74   12.40   0
   7 -16  -3   77.39   14.17   0
   7 -16  -3   87.06   14.14   0
  -8 -16   3   15.39   10.85   0
   8 -16  -3    4.21   12.58   0
  -8 -16  -3   -1.25   10.87   0
   8 -16  -3    2.19   12.51   0
  -9 -16  -3   43.44   11.62   0
  -9 -16   3   12.86   10.72   0
 -10 -16   3   15.88   11.32   0
 -10 -16  -3   -6.20   10.86   0
 -11 -16  -3   28.06   11.26   0
 -12 -16   3    9.71   11.77   0
  -1 -17   3   13.70   11.48   0
   1 -17   3   25.73   11.94   0
   2 -17   3    2.25   12.18   0
  -2 -17   3   -1.53   11.08   0
  -2 -17  -3   -1.13   11.28   0
   3 -17   3   28.07   11.96   0
  -3 -17  -3    8.93   11.79   0
  -3 -17   3   23.40   11.99   0
  -4 -17   3   10.42   10.84   0
  -4 -17  -3   11.53   11.62   0
   4 -17   3    0.68   17.78   0
  -5 -17   3   17.52   11.60   0
   5 -17   3   -1.62   11.75   0
   5 -17  -3    8.26   12.21   0
   6 -17  -3   17.38   12.00   0
   6 -17   3   13.15   12.72   0
  -6 -17  -3   17.44   11.96   0
  -6 -17   3   21.85   12.49   0
   7 -17  -3   26.29   12.97   0
  -7 -17  -3   28.53   11.18   0
   7 -17  -3   14.03   13.42   0
   8 -17  -3    9.38   18.08   0
  -8 -17   3   10.10   10.86   0
   8 -17  -3    6.30   12.57   0
 -10 -17   3   61.75   11.56   0
 -11 -17  -3   -5.21   11.34   0
 -12 -17  -3   14.37   12.31   0
   0 -18   3   21.40   10.90   0
   0 -18  -3   19.96   12.37   0
   1 -18   3   -8.33   15.50   0
  -1 -18  -3   24.59   12.61   0
  -1 -18   3   17.37   11.59   0
   1 -18  -3    2.03   10.75   0
  -2 -18  -3    8.12   14.91   0
  -2 -18   3   20.12   12.18   0
   2 -18  -3    8.20   11.67   0
   2 -18   3   11.10   12.21   0
   3 -18  -3   16.27   10.73   0
  -3 -18  -3    9.42   11.95   0
   3 -18   3    9.37   11.83   0
  -3 -18   3   23.19   11.43   0
   4 -18   3   35.97   11.68   0
   4 -18  -3   36.29   12.06   0
  -4 -18   3   28.73   11.89   0
  -5 -18   3   71.38   11.97   0
  -5 -18  -3   73.36   12.11   0
   5 -18   3   80.71   17.06   0
   5 -18  -3   78.34   12.66   0
   6 -18   3   39.46   17.54   0
   6 -18  -3   30.68   17.20   0
  -6 -18  -3   25.92   11.97   0
  -6 -18   3   22.66   11.92   0
  -7 -18   3   -0.25   11.83   0
   7 -18  -3   16.37   13.46   0
   7 -18  -3    9.60   16.71   0
   7 -18   3    8.70   13.03   0
   7 -18   3   11.88   18.44   0
  -8 -18  -3   -0.90   11.43   0
   8 -18  -3    0.41   16.80   0
  -8 -18   3   -9.82   12.14   0
   8 -18  -3    3.58   12.56   0
  -9 -18   3  100.47   12.69   0
  -9 -18  -3   94.30   12.58   0
 -10 -18   3    8.09   11.35   0
 -11 -18   3   31.84   12.04   0
 -11 -18  -3   39.65   11.80   0
   1 -19   3   19.88   11.36   0
  -1 -19   3   25.77   12.29   0
   1 -19  -3   30.93   11.39   0
  -1 -19  -3   25.96   11.98   0
  -2 -19  -3    3.55   10.75   0
  -2 -19   3   11.51   11.52   0
   2 -19  -3    6.83   11.63   0
   2 -19   3    8.36   11.37   0
   3 -19  -3    2.73   11.56   0
  -3 -19  -3   -2.31   10.35   0
   3 -19   3   -1.45   11.88   0
  -3 -19   3    2.57   11.32   0
  -4 -19   3    4.84   11.42   0
   4 -19   3   10.17   17.90   0
   4 -19  -3    4.06   11.84   0
  -4 -19  -3   18.39   11.73   0
  -5 -19   3   39.73   12.35   0
   5 -19  -3   20.87   17.26   0
   5 -19   3   26.77   12.89   0
  -5 -19  -3   26.60   11.61   0
  -6 -19  -3    3.08   11.39   0
   6 -19   3    1.75   11.91   0
   6 -19  -3   -2.88   11.82   0
  -6 -19   3   19.14   12.16   0
   7 -19  -3    8.74   11.69   0
  -7 -19  -3   23.88   11.79   0
   7 -19   3    2.01   12.57   0
   7 -19   3    9.47   17.85   0
   7 -19  -3    5.32   17.49   0
  -7 -19   3   18.13   12.45   0
   8 -19  -3   -0.31   13.01   0
   8 -19  -3    6.25   12.85   0
  -9 -19   3    7.13   12.08   0
 -10 -19  -3   45.30   11.91   0
   0 -20  -3   64.81   12.05   0
   0 -20   3   49.34   12.23   0
  -1 -20  -3   20.36   11.35   0
   1 -20  -3   25.22   12.22   0
   1 -20   3   11.28   11.46   0
  -1 -20   3   32.97   12.13   0
  -2 -20   3   55.58   11.86   0
   2 -20   3   74.66   12.50   0
  -2 -20  -3   74.01   12.54   0
   2 -20  -3   86.92   13.59   0
   3 -20   3   -4.77   11.58   0
   3 -20  -3    6.40   12.31   0
  -4 -20   3   11.26   12.00   0
  -4 -20  -3    7.50   11.14   0
   4 -20  -3   -6.35   11.13   0
   4 -20   3    8.19   11.36   0
   5 -20  -3   21.40   12.50   0
  -5 -20   3   29.12   11.55   0
   5 -20   3   16.24   11.95   0
   6 -20   3    6.39   12.60   0
  -6 -20   3   17.62   10.78   0
   6 -20  -3   -3.52   12.00   0
  -6 -20  -3  -16.52   12.02   0
   7 -20  -3   32.27   17.60   0
   7 -20  -3   21.62   13.24   0
   7 -20   3   36.51   19.16   0
   8 -20  -3    4.00   18.21   0
   8 -20  -3    9.40   18.96   0
  -8 -20   3   -0.42   12.16   0
  -8 -20  -3    8.16   12.02   0
  -1 -21   3    9.97   12.17   0
   1 -21   3    3.77   11.56   0
  -1 -21  -3    1.66   11.30   0
   1 -21  -3    4.64   11.55   0
   2 -21  -3   20.91   11.09   0
  -2 -21   3   24.82   11.50   0
  -2 -21  -3   16.79   11.42   0
   2 -21   3   25.97   11.91   0
  -3 -21  -3   11.56   11.33   0
   3 -21  -3   15.01   11.76   0
   3 -21   3   17.49   12.72   0
  -3 -21   3   25.73   11.77   0
  -4 -21   3   19.42   11.76   0
   4 -21   3    6.17   12.38   0
   4 -21  -3   16.20   11.86   0
   5 -21   3    5.44   12.07   0
   5 -21  -3    6.46   11.71   0
  -5 -21   3   -7.38   11.68   0
  -5 -21  -3   -2.01   11.03   0
   6 -21  -3    4.75   17.88   0
   6 -21   3    1.76   17.62   0
   7 -21  -3    9.56   12.38   0
  -7 -21   3  -13.42   12.04   0
  -7 -21  -3   -2.84   12.20   0
   7 -21   3    7.74   18.35   0
   7 -21  -3    5.55   12.86   0
   8 -21  -3   -0.48   13.37   0
  -8 -21   3   -8.38   12.65   0
   8 -21  -3    2.54   13.05   0
   0 -22   3   52.53   12.53   0
   0 -22  -3   21.17   11.68   0
  -1 -22   3   -3.19   12.26   0
   1 -22   3   19.35   12.07   0
  -1 -22  -3   -9.58   12.17   0
   1 -22  -3   15.52   11.94   0
   2 -22   3   36.22   16.65   0
  -2 -22  -3   41.04   11.19   0
  -2 -22   3   34.38   12.60   0
   2 -22  -3   34.82   11.74   0
  -3 -22  -3   38.31   11.67   0
   3 -22  -3   10.92   11.92   0
  -3 -22   3   -9.45   11.16   0
   3 -22   3    0.95   12.35   0
   4 -22  -3   28.70   12.90   0
  -4 -22  -3   31.59   11.17   0
   4 -22   3   29.96   12.54   0
  -5 -22   3    9.67   11.46   0
   5 -22  -3    9.62   12.02   0
   5 -22   3   11.74   12.57   0
  -6 -22  -3   18.51   12.01   0
   6 -22   3    9.35   12.90   0
  -6 -22   3   19.79   12.15   0
   6 -22  -3    5.97   13.35   0
   1 -23  -3   28.95   12.37   0
  -1 -23  -3    1.06   12.63   0
   1 -23   3   22.90   12.13   0
  -1 -23   3   23.13   12.04   0
   2 -23   3   -1.79   12.31   0
   2 -23  -3    7.28   11.90   0
  -2 -23   3   -3.11   12.12   0
   3 -23  -3   -4.04   12.34   0
  -3 -23   3    4.62   11.13   0
  -3 -23  -3   -1.91   12.33   0
   3 -23   3   14.07   17.45   0
  -4 -23   3    6.05   11.85   0
   4 -23  -3   -1.12   12.87   0
   4 -23   3    6.74   12.52   0
  -4 -23  -3    6.02   11.39   0
   0   0  -4 1065.21   33.74   0
  -1   0   4    8.70   18.37   0
   1   0  -4    7.85   18.81   0
   2   0  -4 5709.88   59.55   0
  -2   0   4 5624.61   59.66   0
  -3   0   4  634.68   25.88   0
   3   0  -4  661.10   25.59   0
   4   0  -4 9999.99   64.92   0
  -4   0   4 9789.98   64.98   0
   5   0  -4   79.51   19.77   0
  -5   0   4   82.80   14.31   0
   6   0  -4   48.80   15.29   0
  -6   0   4   56.84   15.39   0
  -7   0   4  148.35   15.80   0
   7   0  -4  124.49   15.92   0
  -7   0  -4  136.77   15.21   0
   8   0  -4   28.94   12.69   0
  -8   0  -4   27.99   12.31   0
  -8   0   4   21.85   12.76   0
  -9   0   4   14.25   11.51   0
   9   0  -4    9.75   16.81   0
  -9   0  -4    3.17   16.04   0
 -10   0  -4  311.87   19.12   0
 -10   0   4  309.58   15.29   0
  10   0  -4  302.03   14.98   0
 -11   0   4   -7.80   12.47   0
 -11   0  -4   -3.57   12.26   0
 -12   0   4  104.75   12.42   0
 -12   0  -4   91.54   12.43   0
 -13   0  -4   13.13   12.08   0
 -13   0   4   19.71   12.48   0
 -14   0   4   11.43   11.64   0
 -14   0  -4   -0.53   15.99   0
 -15   0  -4   50.20   11.56   0
 -15   0   4   55.21   12.91   0
 -16   0  -4    7.24   12.28   0
 -16   0   4   10.65   12.24   0
 -17   0  -4   11.21   11.92   0
 -17   0   4   -3.85   12.36   0
  -1  -1   4  205.09   21.24   0
  -1   1  -4  207.08   25.42   0
   1   1  -4  223.34   21.05   0
  -1   1   4  208.04   24.56   0
   1  -1  -4  213.03   23.91   0
  -2  -1   4  674.47   25.79   0
   2  -1  -4  588.15   27.96   0
   2   1  -4  665.16   25.12   0
  -2   1   4  638.95   29.49   0
   3   1  -4  134.24   19.15   0
   3  -1  -4   78.77   19.22   0
  -3  -1   4  134.82   19.71   0
  -3   1   4  129.96   20.79   0
   4  -1  -4    0.70   15.49   0
  -4  -1   4    3.42   15.95   0
   4   1  -4  -11.19   14.66   0
  -4   1   4    6.02   15.78   0
  -5   1   4   18.09   14.22   0
   5  -1  -4    3.90   14.00   0
   5   1  -4   12.24   13.87   0
  -5  -1   4    6.45   13.59   0
   6   1  -4   25.67   14.66   0
   6  -1  -4   23.19   14.27   0
  -6   1   4   22.85   20.31   0
  -6  -1   4   30.74   14.74   0
  -7   1   4   21.28   15.19   0
  -7   1  -4   15.38   14.12   0
  -7  -1   4   23.18   14.28   0
   7   1  -4   18.02   14.09   0
   7  -1  -4   36.89   14.20   0
  -8  -1   4  136.26   13.60   0
   8   1  -4  125.55   14.30   0
  -8   1   4  122.46   13.64   0
  -8  -1  -4  123.72   13.67   0
   8  -1  -4  119.60   18.99   0
  -8   1  -4  128.18   14.02   0
  -9   1   4    0.28   12.31   0
   9  -1  -4   -0.66   12.42   0
   9   1  -4   -6.16   11.40   0
  -9   1  -4    1.58   11.83   0
  -9  -1   4    4.50   11.42   0
  -9  -1  -4   -1.88   11.24   0
 -10  -1   4   21.90   12.20   0
 -10   1   4   10.81   12.44   0
 -10  -1  -4   14.93   12.46   0
 -10   1  -4   20.84   11.74   0
  10  -1  -4   17.92   11.93   0
 -11  -1   4   27.66   11.86   0
 -11   1   4   36.12   12.39   0
 -11  -1  -4   38.87   12.49   0
 -11   1  -4   41.62   12.34   0
 -12  -1   4    6.08   11.80   0
 -12   1  -4   -0.69   11.42   0
 -12  -1  -4    3.59   12.07   0
 -12   1   4   16.07   11.67   0
 -13   1   4    2.54   16.79   0
 -13  -1  -4   -8.60   15.23   0
 -13  -1   4   10.68   12.35   0
 -13   1  -4    6.75   10.99   0
 -14   1  -4   -1.62   11.46   0
 -14  -1  -4   15.76   11.18   0
 -14  -1   4   19.50   11.13   0
 -14   1   4    8.00   11.09   0
 -15   1   4    3.52   11.74   0
 -15  -1  -4    4.82   11.17   0
 -15   1  -4    4.41   10.96   0
 -15  -1   4   17.11   11.18   0
 -16  -1   4   11.28   11.59   0
 -16   1   4    7.10   11.98   0
 -16   1  -4    4.32   11.83   0
 -16  -1  -4    4.00   11.32   0
 -17   1   4   -4.12   12.44   0
 -17   1  -4   -1.32   12.41   0
 -17  -1   4   -6.40   11.97   0
 -17  -1  -4   10.76   12.23   0
   0  -2   4   22.72   20.49   0
   0   2  -4   33.41   19.90   0
  -1  -2   4  103.40   19.44   0
   1  -2   4  120.75   24.10   0
   1   2  -4  127.75   19.88   0
  -1   2  -4  128.45   23.42   0
  -2  -2   4  562.10   22.52   0
  -2   2  -4  576.93   33.68   0
   2  -2  -4  578.32   27.50   0
   2   2  -4  581.10   22.55   0
  -2   2   4  570.28   29.85   0
  -3  -2   4   43.11   16.16   0
  -3   2   4   37.65   25.95   0
   3   2  -4   39.29   21.37   0
   3  -2  -4   36.30   18.09   0
   4  -2  -4  731.54   24.54   0
  -4  -2   4  733.89   21.73   0
   4   2  -4  738.41   21.28   0
  -4   2   4  721.46   24.70   0
  -5   2   4  159.25   16.53   0
   5  -2  -4  162.90   16.18   0
  -5  -2   4  161.10   15.26   0
   5   2  -4  167.18   14.85   0
  -6   2  -4  559.42   21.51   0
   6   2  -4  568.55   18.67   0
  -6  -2   4  587.92   19.04   0
  -6   2   4  598.42   25.69   0
   6  -2  -4  594.20   20.20   0
  -7   2  -4  201.41   16.57   0
  -7  -2   4  198.76   16.22   0
   7   2  -4  209.25   15.87   0
   7  -2  -4  159.27   16.28   0
  -7   2   4  207.58   17.09   0
   8  -2  -4   21.86   12.40   0
  -8  -2   4   21.03   12.81   0
  -8   2  -4   15.51   12.29   0
  -8   2   4   12.73   13.11   0
   8   2  -4   11.15   12.69   0
  -8  -2  -4    9.51   12.38   0
  -9  -2   4   23.60   11.77   0
  -9  -2  -4   30.05   11.76   0
  -9   2  -4   28.13   11.92   0
  -9   2   4   22.14   12.24   0
   9   2  -4   20.75   12.20   0
   9  -2  -4   28.97   11.82   0
  10  -2  -4    2.91   12.11   0
 -10   2   4    5.18   12.35   0
 -10  -2  -4   13.26   16.33   0
 -10  -2   4    7.59   11.42   0
 -10   2  -4    2.60   11.11   0
 -11  -2   4  123.57   12.21   0
 -11   2   4  103.28   12.88   0
 -11  -2  -4  126.34   12.57   0
 -11   2  -4   92.60   12.31   0
 -12   2  -4   53.59   12.68   0
 -12  -2   4   63.43   12.62   0
 -12  -2  -4   64.23   12.14   0
 -12   2   4   56.04   11.94   0
 -13  -2   4   58.08   11.17   0
 -13  -2  -4   37.00   16.69   0
 -13   2   4   39.48   10.91   0
 -13   2  -4   35.07   12.52   0
 -14  -2  -4   13.65   11.22   0
 -14   2   4    8.82   12.04   0
 -14   2  -4   13.89   11.97   0
 -14  -2   4   15.22   11.37   0
 -15   2  -4  103.76   18.68   0
 -15  -2   4   74.95   11.62   0
 -15   2   4   85.21   13.71   0
 -15  -2  -4   90.45   12.76   0
 -16   2  -4   13.18   12.30   0
 -16  -2  -4   12.89   11.41   0
 -16  -2   4    9.38   11.49   0
 -16   2   4   16.77   12.67   0
 -17   2  -4   -1.23   12.19   0
 -17  -2  -4   -9.06   11.91   0
 -17   2   4   -1.93   12.52   0
 -17  -2   4    7.52   11.81   0
  -1  -3   4   41.79   17.51   0
   1   3  -4   39.04   18.68   0
  -1   3  -4   45.73   19.31   0
   1  -3   4   46.46   20.43   0
   2   3  -4  842.51   23.34   0
   2  -3  -4  886.35   31.11   0
  -2   3  -4  530.88   30.31   0
   2  -3   4  826.32   37.18   0
  -2  -3   4  832.07   23.99   0
   3  -3  -4   29.27   17.68   0
   3   3  -4   26.33   13.49   0
  -3   3  -4   15.88   18.57   0
  -3  -3   4   20.85   13.87   0
   4  -3  -4  142.89   23.04   0
   4   3  -4  139.42   15.12   0
  -4  -3   4  123.83   15.65   0
  -4   3   4  109.46   18.33   0
   5  -3  -4   10.59   14.35   0
  -5   3   4   -1.96   15.60   0
   5   3  -4   17.92   13.26   0
  -5  -3   4    4.56   14.01   0
  -6   3   4   33.02   15.72   0
   6   3  -4   42.76   14.72   0
   6  -3  -4   35.89   14.77   0
  -6  -3   4   23.71   15.02   0
  -6   3  -4   29.53   14.13   0
  -7  -3   4   11.21   19.81   0
  -7   3   4    6.12   14.14   0
  -7   3  -4    8.14   13.48   0
   7  -3  -4   -0.84   12.76   0
   7   3  -4    2.12   13.72   0
  -8  -3   4  686.58   17.60   0
  -8   3   4  679.80   20.12   0
  -8   3  -4  656.39   21.08   0
  -8  -3  -4  686.19   17.83   0
   8  -3  -4  730.06   19.55   0
   8   3  -4  666.04   17.55   0
  -9  -3  -4   13.23   11.26   0
  -9   3  -4    4.40   11.70   0
  -9   3   4    4.85   12.32   0
  -9  -3   4    7.85   11.18   0
   9  -3  -4   -0.27   11.91   0
 -10  -3   4   29.65   11.51   0
 -10   3   4   24.35   17.46   0
 -10  -3  -4   27.09   12.04   0
 -10   3  -4   19.79   12.13   0
  10  -3  -4   26.13   12.39   0
 -11   3   4   12.21   17.07   0
 -11  -3  -4   30.50   15.56   0
 -11  -3   4    8.75   11.28   0
 -11   3  -4   -6.43   11.03   0
 -12   3   4   19.52   11.77   0
 -12  -3   4    5.54   12.11   0
 -12  -3  -4    8.42   11.75   0
 -12   3  -4   19.29   12.57   0
 -13  -3  -4   10.18   10.53   0
 -13   3  -4    3.59   12.35   0
 -13  -3   4   -1.72   11.97   0
 -13   3   4   -3.67   12.08   0
 -14   3  -4   23.51   17.04   0
 -14  -3   4   47.44   16.62   0
 -14  -3  -4   25.27   11.74   0
 -14   3   4   24.64   12.19   0
 -15  -3  -4   18.75   10.71   0
 -15  -3   4   26.89   16.11   0
 -15   3   4   20.14   11.41   0
 -15   3  -4   16.87   12.11   0
 -16   3   4   25.60   12.76   0
 -16  -3  -4   21.05   12.15   0
 -16  -3   4   11.85   17.01   0
 -16   3  -4   14.87   12.68   0
 -17   3   4    1.88   12.28   0
 -17  -3  -4    7.40   12.17   0
 -17  -3   4    4.44   17.04   0
 -17   3  -4    9.40   12.39   0
   0  -4   4 5077.52   55.76   0
   0   4  -4 4555.41   51.35   0
   1   4  -4  751.92   24.00   0
  -1   4  -4  740.03   28.19   0
   1  -4   4  718.52   28.86   0
  -1  -4   4  740.33   24.27   0
  -2  -4   4  693.40   21.88   0
   2  -4   4  724.12   36.36   0
  -2   4  -4  701.99   31.41   0
   2   4  -4  725.43   26.02   0
   3  -4  -4  183.59   26.90   0
  -3  -4   4  135.26   15.61   0
   3   4  -4  193.60   15.85   0
  -3   4  -4  135.25   21.48   0
  -4  -4   4 2216.50   28.23   0
  -4   4  -4 2237.06   76.02   0
   4   4  -4 2199.02   28.11   0
   4  -4  -4 2247.25   38.12   0
  -5   4  -4   -0.73   13.25   0
   5  -4  -4   -4.93   14.94   0
  -5  -4   4  -15.90   19.68   0
   5   4  -4    8.89   14.32   0
  -5   4   4   -0.60   16.23   0
  -6   4   4  989.74   26.84   0
   6  -4  -4 1154.73   27.66   0
  -6  -4   4 1109.08   21.59   0
   6   4  -4 1023.67   21.03   0
  -6   4  -4  824.50   32.54   0
  -7   4  -4  106.00   21.49   0
  -7   4   4  107.35   16.22   0
   7  -4  -4  105.71   14.65   0
  -7  -4   4  108.24   14.76   0
   7   4  -4  107.90   14.04   0
  -8   4   4   -8.47   12.43   0
   8  -4  -4    3.00   12.31   0
  -8  -4  -4    3.48   11.83   0
  -8  -4   4   -3.07   11.81   0
  -8   4  -4    2.95   18.55   0
  -9   4  -4   43.13   13.40   0
  -9   4   4   45.42   12.84   0
  -9  -4  -4   56.92   11.41   0
   9  -4  -4   52.13   12.46   0
  -9  -4   4   63.40   15.99   0
 -10   4   4    5.18   12.69   0
 -10  -4   4   -5.90   11.78   0
 -10  -4  -4   14.34   11.59   0
  10  -4  -4    6.02   11.89   0
 -10   4  -4   -4.15   16.70   0
 -11  -4  -4  113.31   12.30   0
 -11   4   4   81.62   12.88   0
 -11   4  -4  116.33   14.53   0
 -11  -4   4  118.17   12.65   0
  11  -4  -4  120.79   12.80   0
 -12  -4  -4   29.81   16.07   0
 -12  -4   4   37.33   12.17   0
 -12   4   4   22.55   12.21   0
 -12   4  -4   37.89   17.87   0
 -13   4  -4    7.09   11.24   0
 -13  -4   4    4.59   12.07   0
 -13   4   4    6.92   11.83   0
 -13  -4  -4    3.95   11.11   0
 -14   4  -4   35.44   17.92   0
 -14  -4   4   27.67   16.18   0
 -14  -4  -4    5.30   11.26   0
 -14   4   4   28.97   12.55   0
 -15  -4  -4   14.82   11.58   0
 -15   4   4    3.69   13.26   0
 -15   4  -4   13.13   11.50   0
 -15  -4   4   38.88   16.14   0
 -16  -4  -4   26.80   16.30   0
 -16   4  -4   10.69   12.80   0
 -16   4   4   -6.47   12.79   0
 -16  -4   4   28.75   16.84   0
 -17   4   4   -1.60   12.16   0
 -17  -4  -4   -3.47   11.99   0
 -17  -4   4   -1.23   11.77   0
 -17   4  -4   -0.19   12.59   0
  -1   5  -4  274.94   20.54   0
   1  -5   4  287.44   21.32   0
   1   5  -4  280.75   18.20   0
  -1  -5   4  299.29   18.49   0
  -2   5  -4  601.31   30.85   0
   2   5  -4  605.26   20.14   0
   2  -5   4  604.16   28.05   0
  -2  -5   4  510.26   19.59   0
  -3   5  -4   16.29   20.23   0
   3   5  -4   20.96   13.38   0
  -3  -5   4   13.93   13.84   0
   3  -5   4   16.02   16.30   0
   4  -5  -4  603.05   23.89   0
   4   5  -4  604.88   18.37   0
  -4  -5   4  592.41   18.84   0
  -5  -5   4   12.46   13.97   0
   5   5  -4    5.00   14.10   0
   5  -5  -4   10.45   14.81   0
   6  -5  -4  289.85   18.31   0
  -6  -5   4  303.55   15.86   0
   6   5  -4  298.50   15.76   0
  -7  -5   4   31.62   13.67   0
  -7   5   4   34.05   20.06   0
   7  -5  -4   22.99   13.28   0
  -7   5  -4   35.22   20.60   0
  -8   5  -4   59.75   14.44   0
  -8   5   4   76.69   14.69   0
  -8  -5   4   81.99   12.49   0
   8  -5  -4   82.92   12.80   0
  -8  -5  -4   77.33   12.17   0
  -9  -5   4   11.85   11.24   0
  -9   5  -4    5.38   11.89   0
  -9   5   4    6.43   13.00   0
   9  -5  -4    7.48   11.99   0
  -9  -5  -4    2.90   10.85   0
  10  -5  -4   99.80   13.55   0
 -10   5   4  109.93   14.64   0
 -10   5  -4  102.44   14.55   0
 -10  -5  -4  109.86   12.36   0
 -10  -5   4  120.92   13.06   0
  11  -5  -4   11.04   11.45   0
 -11   5   4   12.30   13.32   0
 -11  -5   4    6.51   11.43   0
 -11  -5  -4    3.24   15.99   0
 -11   5  -4    6.46   12.61   0
 -12   5  -4    3.88   12.40   0
 -12   5   4    6.67   12.70   0
 -12  -5  -4   -8.08   11.29   0
 -12  -5   4   -3.85   11.09   0
 -13  -5   4   14.24   10.96   0
 -13   5  -4    6.26   16.51   0
 -13   5   4   -0.21   12.40   0
 -13  -5  -4   19.99   15.71   0
 -14  -5  -4   30.83   11.39   0
 -14   5   4   18.36   18.20   0
 -14  -5   4   21.97   11.82   0
 -14   5  -4   12.13   12.86   0
 -15  -5   4   -1.32   11.27   0
 -15   5  -4   -1.27   11.85   0
 -15  -5  -4    4.37   11.08   0
 -15   5   4    3.20   12.48   0
 -16  -5  -4   23.73   12.46   0
 -16   5  -4   -2.74   12.38   0
 -16   5   4   -2.19   13.19   0
 -16  -5   4   20.26   11.83   0
   0   6  -4   77.12   14.32   0
   0  -6   4   70.87   14.89   0
   1  -6   4   -2.51   14.93   0
  -1   6  -4    2.43   20.25   0
  -1  -6   4    8.62   13.49   0
   1   6  -4    0.24   13.70   0
   2   6  -4  406.95   17.62   0
   2  -6   4  412.98   22.39   0
  -2  -6   4  407.28   17.83   0
  -2   6  -4  387.82   21.91   0
   3  -6   4   38.04   15.93   0
  -3  -6   4   44.69   13.86   0
   3   6  -4   41.15   13.40   0
   4  -6  -4  110.94   17.68   0
  -4  -6   4  110.09   15.03   0
   4   6  -4   95.00   15.04   0
  -5  -6   4  187.23   15.98   0
   5   6  -4  261.65   15.69   0
   5  -6  -4  277.83   18.83   0
  -6  -6   4  144.06   13.93   0
   6  -6  -4  125.65   16.09   0
  -7  -6   4  115.96   18.47   0
   7  -6  -4  104.18   14.79   0
  -8  -6   4  137.05   12.83   0
  -8  -6  -4  137.92   13.33   0
   8  -6  -4   80.55   13.21   0
   9  -6  -4    5.30   12.32   0
  -9   6  -4    6.26   18.15   0
  -9  -6   4    8.54   12.11   0
  -9   6   4    5.29   12.92   0
  -9  -6  -4   24.54   11.06   0
 -10   6  -4  228.79   26.17   0
 -10  -6  -4  244.24   13.31   0
  10  -6  -4  236.33   15.77   0
 -10  -6   4  217.26   13.05   0
 -10   6   4  133.74   15.47   0
 -11   6  -4   92.65   20.81   0
 -11  -6  -4   89.45   11.65   0
 -11   6   4   81.01   14.95   0
  11  -6  -4   97.87   14.41   0
 -11  -6   4   88.03   12.54   0
 -12  -6  -4   25.82   10.86   0
 -12   6   4   23.47   13.10   0
 -12  -6   4   18.04   11.14   0
 -12   6  -4   27.54   18.56   0
 -13  -6  -4   27.28   11.34   0
 -13   6  -4   18.55   13.30   0
 -13   6   4   15.92   13.15   0
 -13  -6   4   34.73   11.48   0
 -14   6  -4    2.44   11.87   0
 -14  -6   4    9.10   11.09   0
 -14  -6  -4   11.69   16.07   0
 -14   6   4    7.65   12.36   0
 -15   6  -4    2.91   12.97   0
 -15  -6   4   36.45   11.42   0
 -15  -6  -4   11.18   11.46   0
 -15   6   4   -0.65   12.57   0
 -16  -6  -4    6.11   11.91   0
 -16   6   4    3.90   12.47   0
 -16  -6   4   -2.50   10.79   0
 -16   6  -4    2.77   12.13   0
   1  -7   4   31.15   14.67   0
   1   7  -4   28.31   13.92   0
  -1  -7   4   43.18   14.08   0
   2   7  -4   35.15   13.80   0
   2  -7   4   29.68   14.56   0
  -2  -7   4   17.22   19.60   0
  -3  -7   4  407.69   17.48   0
   3  -7   4  423.46   23.28   0
  -4  -7   4   39.04   14.65   0
   4  -7   4   44.05   18.83   0
  -5  -7   4   96.34   15.32   0
   5  -7  -4  103.71   22.47   0
  -6  -7   4   31.66   12.17   0
   6  -7  -4   40.18   14.54   0
  -7  -7   4   15.26   12.05   0
   7  -7  -4    1.17   12.62   0
  -8  -7   4   48.53   12.02   0
   8  -7  -4   61.22   13.31   0
  -8  -7  -4   69.05   12.58   0
   9  -7  -4   15.97   11.75   0
  -9  -7  -4    9.60   12.55   0
  -9  -7   4   12.33   12.20   0
 -10  -7   4  318.72   14.49   0
  10  -7  -4  316.19   17.41   0
 -10  -7  -4  298.68   13.56   0
  11  -7  -4   55.48   13.62   0
 -11  -7   4   43.10   11.78   0
 -11  -7  -4   49.72   11.66   0
 -12  -7   4   71.05   11.74   0
 -12  -7  -4   57.16   11.02   0
 -13  -7  -4   -3.84   10.55   0
 -14  -7   4   34.96   11.82   0
 -14  -7  -4   32.30   11.60   0
 -15  -7  -4  -10.96   11.58   0
 -15  -7   4   -4.31   11.32   0
 -16  -7   4   15.98   11.75   0
 -16  -7  -4    5.96   12.22   0
   0  -8   4   61.97   14.96   0
   1  -8   4  121.20   15.86   0
  -1  -8   4  117.29   15.62   0
  -2  -8   4  561.12   19.01   0
   2  -8   4  568.18   21.81   0
   3  -8   4   50.74   15.00   0
  -3  -8   4   63.17   14.38   0
  -4  -8   4  102.65   14.66   0
   4  -8   4  109.38   24.57   0
   5  -8  -4  111.75   16.74   0
  -5  -8   4  130.90   17.93   0
   6  -8  -4   50.74   14.40   0
  -6  -8   4   34.82   11.48   0
   7  -8  -4  224.79   16.91   0
  -7  -8   4   60.95   11.47   0
  -8  -8   4   65.42   12.85   0
  -8  -8  -4   84.91   12.90   0
   8  -8  -4   94.02   14.19   0
  -9  -8  -4  139.51   12.68   0
   9  -8  -4  125.96   15.05   0
  -9  -8   4  149.81   13.35   0
 -10  -8   4   71.64   16.41   0
 -10  -8  -4   41.31   12.15   0
  10  -8  -4   47.94   13.80   0
  11  -8  -4  269.18   17.74   0
 -11  -8  -4  296.33   13.34   0
 -11  -8   4  313.78   13.69   0
 -12  -8   4   49.33   12.20   0
 -12  -8  -4   43.26   12.05   0
 -13  -8   4   24.00   11.18   0
 -13  -8  -4   -3.07   10.93   0
 -14  -8  -4   54.12   11.92   0
 -14  -8   4   40.55   11.76   0
 -15  -8  -4    5.82   10.79   0
 -15  -8   4   -6.05   11.86   0
 -16  -8  -4   -5.03   11.40   0
 -16  -8   4   -8.45   12.67   0
  -1  -9   4  660.13   19.75   0
   1  -9   4  664.48   21.36   0
  -2  -9   4  796.71   24.56   0
   2  -9   4  782.17   23.59   0
  -3  -9   4   19.39   13.46   0
   3  -9   4    8.58   13.64   0
   4  -9   4  233.12   19.69   0
  -4  -9   4  247.21   15.32   0
  -5  -9   4   98.73   12.55   0
   5  -9  -4  103.38   15.77   0
   6  -9  -4   16.48   13.67   0
  -6  -9   4   26.47   11.86   0
  -7  -9   4   37.84   12.00   0
   7  -9  -4   24.23   13.45   0
  -8  -9  -4   39.29   12.18   0
  -8  -9   4   32.98   11.53   0
   8  -9  -4   28.18   12.71   0
  -9  -9  -4  -11.82   11.98   0
   9  -9  -4    1.20   18.05   0
  -9  -9   4   -1.25   11.33   0
  10  -9  -4  366.45   20.96   0
 -10  -9   4  445.83   14.54   0
 -10  -9  -4  350.89   14.32   0
 -11  -9  -4   40.15   11.51   0
 -11  -9   4   31.13   11.88   0
 -12  -9   4  144.12   12.60   0
 -12  -9  -4  124.83   12.57   0
 -13  -9   4   17.84   11.23   0
 -13  -9  -4   14.79   11.50   0
 -14  -9  -4   15.10   11.54   0
 -15  -9  -4   -3.45   11.83   0
 -15  -9   4   -2.47   11.80   0
 -16  -9  -4    2.47   12.19   0
 -16  -9   4    9.17   11.94   0
   0 -10   4  150.36   15.73   0
   1 -10   4   38.89   13.18   0
  -1 -10   4   43.47   14.06   0
  -2 -10   4   59.72   14.12   0
   2 -10   4   45.19   14.22   0
  -3 -10   4  504.24   17.03   0
   3 -10   4  455.19   19.68   0
  -4 -10   4   45.20   12.57   0
   4 -10   4   34.70   19.58   0
  -5 -10   4   20.69   12.00   0
   5 -10   4   11.44   13.93   0
   6 -10  -4  104.09   14.47   0
  -6 -10   4  114.95   12.01   0
   7 -10  -4   67.22   13.81   0
  -7 -10   4   79.53   11.95   0
   8 -10  -4   88.09   14.06   0
  -8 -10  -4  156.18   13.22   0
  -8 -10   4  100.35   11.70   0
   9 -10  -4   37.49   13.68   0
  -9 -10   4   88.09   12.34   0
  -9 -10  -4   64.95   12.36   0
  10 -10  -4    3.70   12.40   0
 -10 -10   4    9.73   11.78   0
 -10 -10  -4   -8.06   11.56   0
 -11 -10  -4  241.08   13.67   0
 -11 -10   4  233.09   13.31   0
 -12 -10  -4   49.72   12.09   0
 -13 -10   4   14.81   11.64   0
 -13 -10  -4    6.48   11.15   0
 -14 -10   4   24.20   11.36   0
 -14 -10  -4   16.04   11.65   0
 -15 -10  -4   23.18   12.43   0
 -15 -10   4   17.06   12.50   0
   1 -11   4  328.96   19.42   0
  -1 -11   4  308.65   15.57   0
   2 -11   4   65.79   13.24   0
  -2 -11   4   52.63   13.22   0
  -3 -11   4   21.48   12.22   0
   3 -11   4   15.28   13.07   0
   4 -11   4   36.07   18.93   0
  -4 -11   4   43.31   17.28   0
   5 -11   4   32.84   13.62   0
  -5 -11   4   34.13   12.30   0
   6 -11  -4   10.40   12.59   0
  -6 -11   4   26.89   12.25   0
   7 -11  -4   23.00   13.07   0
  -7 -11   4   38.60   12.09   0
  -8 -11   4  109.11   12.17   0
  -8 -11  -4   69.75   16.33   0
   8 -11  -4   83.15   14.42   0
  -9 -11  -4   36.56   11.58   0
  -9 -11   4   51.32   11.55   0
   9 -11  -4   41.84   13.21   0
 -10 -11   4  195.80   13.49   0
  10 -11  -4  198.60   22.78   0
 -10 -11  -4  195.40   12.75   0
 -11 -11   4    8.35   11.25   0
 -11 -11  -4   26.27   11.42   0
 -12 -11   4  100.50   12.31   0
 -12 -11  -4  149.89   12.69   0
 -13 -11  -4   22.01   11.19   0
 -13 -11   4   38.83   11.71   0
 -14 -11   4   -0.22   11.93   0
 -14 -11  -4    0.14   16.64   0
 -15 -11   4   15.76   12.34   0
 -15 -11  -4    3.37   12.02   0
   0 -12   4    0.01   12.21   0
  -1 -12   4  -13.71   12.12   0
   1 -12   4    7.98   11.69   0
  -2 -12   4   46.60   12.42   0
   2 -12   4   11.80   12.16   0
   3 -12   4  137.66   13.87   0
  -3 -12   4  144.14   13.00   0
  -4 -12   4  137.62   17.17   0
   4 -12   4  128.19   19.25   0
   5 -12   4    8.95   12.75   0
  -5 -12   4   12.06   12.41   0
   6 -12  -4   33.25   18.05   0
  -6 -12   4   41.75   11.73   0
  -7 -12   4   40.82   11.69   0
  -7 -12  -4   47.59   11.65   0
   7 -12  -4   41.21   13.77   0
   8 -12  -4   13.44   13.13   0
  -8 -12   4   16.98   11.23   0
  -8 -12  -4    8.11   11.05   0
  -9 -12  -4   17.67   11.58   0
  -9 -12   4    9.45   12.03   0
   9 -12  -4   12.36   12.25   0
  10 -12  -4    9.86   17.66   0
 -10 -12  -4    7.56   11.99   0
 -10 -12   4   12.94   11.76   0
 -11 -12   4   -5.30   11.36   0
 -11 -12  -4    9.36   11.79   0
 -12 -12  -4   39.19   11.41   0
 -12 -12   4   49.49   11.90   0
 -13 -12   4    2.45   11.22   0
 -13 -12  -4   15.59   11.64   0
 -14 -12   4  -11.19   11.73   0
 -14 -12  -4   20.04   16.62   0
 -15 -12   4  -14.81   11.96   0
 -15 -12  -4    4.57   12.18   0
   1 -13   4   -0.11   17.76   0
  -1 -13   4    2.73   11.79   0
  -2 -13   4    7.91   11.96   0
   2 -13   4    8.82   16.88   0
  -3 -13   4   30.40   11.65   0
   3 -13   4   46.98   13.09   0
  -4 -13   4   14.04   12.17   0
   4 -13   4   33.36   12.85   0
  -5 -13   4   39.60   12.61   0
   5 -13   4   14.75   12.50   0
   6 -13   4   82.25   23.23   0
   6 -13  -4   81.50   14.98   0
  -6 -13   4   86.34   12.86   0
  -7 -13   4   24.26   11.66   0
   7 -13  -4   14.39   13.13   0
  -7 -13  -4   45.41   10.92   0
  -8 -13   4  166.01   12.24   0
   8 -13  -4  159.16   16.82   0
  -8 -13  -4  159.47   12.54   0
  -9 -13   4  111.55   11.89   0
   9 -13  -4   47.13   13.81   0
  -9 -13  -4  101.87   12.61   0
 -10 -13  -4  152.95   12.14   0
 -11 -13   4    5.51   10.95   0
 -12 -13   4  144.91   12.99   0
 -13 -13  -4   -4.69   17.02   0
 -13 -13   4    7.81   11.04   0
 -14 -13  -4   -1.43   11.88   0
   0 -14   4  191.44   14.46   0
   1 -14   4   -5.27   12.84   0
  -1 -14   4   -0.33   11.01   0
   2 -14   4    8.98   12.01   0
  -2 -14   4   13.47   16.25   0
   3 -14   4    8.74   12.02   0
  -3 -14   4   -4.89   11.53   0
  -4 -14   4   58.02   12.88   0
   4 -14   4   20.11   13.27   0
  -5 -14   4    4.53   12.63   0
   5 -14   4    2.24   12.74   0
  -6 -14  -4    0.69   11.50   0
   6 -14   4    8.78   13.75   0
  -6 -14   4   22.24   12.02   0
   7 -14  -4   44.99   18.87   0
  -7 -14   4   41.32   12.57   0
  -8 -14   4   -7.14   10.99   0
   8 -14  -4   -0.19   11.86   0
   9 -14  -4  105.62   21.43   0
  -9 -14   4  114.00   11.77   0
 -11 -14   4   22.10   11.25   0
 -12 -14   4    4.06   11.39   0
 -13 -14  -4   14.43   12.08   0
 -13 -14   4   29.51   11.70   0
 -14 -14  -4    9.27   12.32   0
  -1 -15   4   52.85   12.06   0
   1 -15   4   38.62   12.95   0
  -2 -15   4   78.23   12.47   0
   2 -15   4   91.34   13.52   0
   3 -15   4   45.58   11.79   0
  -3 -15   4   26.64   11.71   0
   4 -15   4  172.71   19.37   0
  -4 -15   4  160.79   13.18   0
   5 -15   4   11.64   12.51   0
  -5 -15   4   35.61   11.93   0
   6 -15   4   80.37   14.99   0
  -6 -15   4   71.58   11.90   0
  -6 -15  -4  120.88   12.42   0
  -7 -15  -4   47.75   11.78   0
  -7 -15   4   63.55   12.10   0
   7 -15  -4   41.49   12.67   0
   8 -15  -4   34.84   13.18   0
  -8 -15  -4   45.19   11.34   0
  -9 -15   4   15.21   11.08   0
   9 -15  -4    0.95   17.20   0
   9 -15  -4    1.82   16.96   0
  -9 -15  -4   -4.98   10.68   0
 -10 -15  -4   75.99   12.34   0
 -11 -15   4   14.58   11.30   0
 -11 -15  -4    6.64   11.67   0
 -12 -15   4   54.93   11.80   0
 -12 -15  -4   52.18   12.66   0
 -13 -15  -4   -3.04   11.72   0
   0 -16   4    6.28   11.59   0
   1 -16   4   -7.25   12.04   0
  -1 -16   4   -1.62   11.59   0
   2 -16   4   11.95   11.44   0
  -2 -16   4   12.06   11.51   0
   3 -16   4   10.03   11.28   0
  -3 -16   4    4.96   11.14   0
  -4 -16   4   40.66   12.25   0
   4 -16   4   34.64   18.35   0
  -5 -16   4   22.12   16.53   0
   5 -16   4   19.13   12.33   0
  -5 -16  -4   45.09   11.43   0
  -6 -16   4   10.86   12.08   0
  -6 -16  -4   11.45   11.41   0
   6 -16   4    7.99   17.01   0
   7 -16  -4    8.30   12.45   0
  -7 -16   4    6.95   11.23   0
   8 -16  -4    3.95   12.08   0
  -8 -16   4   -5.23   11.01   0
   8 -16  -4   -0.42   12.58   0
   9 -16  -4    4.36   12.76   0
   9 -16  -4    4.23   12.01   0
  -9 -16   4   13.27   10.77   0
 -10 -16  -4   -2.88   11.28   0
 -10 -16   4   -7.24   11.11   0
 -11 -16  -4   -1.74   11.31   0
 -12 -16  -4  -12.60   11.82   0
 -12 -16   4    2.33   11.34   0
   1 -17   4   92.88   12.80   0
  -1 -17   4  121.71   12.99   0
  -2 -17   4    5.49   11.82   0
   2 -17   4   28.87   11.63   0
  -3 -17   4  -13.34   11.09   0
   3 -17   4   16.94   11.72   0
  -4 -17  -4  138.91   12.87   0
  -4 -17   4  138.35   16.96   0
   4 -17   4  127.07   13.98   0
  -5 -17   4   -8.34   11.93   0
   5 -17   4    6.07   11.65   0
   6 -17   4   82.35   15.08   0
  -6 -17   4  112.77   12.09   0
  -6 -17  -4   80.26   12.53   0
   7 -17  -4   25.81   12.95   0
   7 -17  -4   33.98   12.22   0
  -7 -17  -4   22.47   11.90   0
  -8 -17  -4    6.66   11.30   0
  -8 -17   4    4.22   11.60   0
   8 -17  -4   -4.00   16.53   0
   8 -17  -4    8.39   12.07   0
   9 -17  -4    0.86   11.85   0
   9 -17  -4    0.77   11.76   0
  -9 -17   4   15.01   11.41   0
 -10 -17   4   12.75   11.61   0
 -11 -17  -4   -1.96   11.39   0
 -12 -17  -4    9.44   12.13   0
 -12 -17   4    7.53   11.77   0
   0 -18   4   -1.52   12.59   0
   1 -18   4    2.39   10.64   0
  -1 -18   4   -4.99   12.07   0
  -2 -18   4   -7.79   11.62   0
   2 -18   4   -8.97   12.66   0
  -3 -18  -4    2.66   11.26   0
   3 -18   4   -5.87   12.20   0
  -3 -18   4    8.30   11.34   0
  -4 -18   4    7.34   10.84   0
   4 -18   4    9.98   12.20   0
  -5 -18  -4   10.28   11.73   0
  -5 -18   4    8.75   11.89   0
   5 -18   4    2.26   12.12   0
   6 -18   4   21.96   17.54   0
   6 -18  -4   19.69   12.15   0
  -6 -18   4   31.88   12.01   0
  -6 -18  -4   27.70   11.59   0
   7 -18  -4   59.30   13.57   0
   7 -18  -4   50.06   13.92   0
  -7 -18   4   58.91   12.26   0
  -8 -18   4  -10.07   11.59   0
   8 -18  -4   -0.60   11.71   0
   8 -18  -4    2.62   12.12   0
   9 -18  -4    2.18   17.29   0
  -9 -18  -4    6.19   11.40   0
   9 -18  -4    1.48   17.75   0
 -10 -18   4   -8.50   11.72   0
 -10 -18  -4   19.95   12.14   0
 -11 -18  -4   16.57   12.08   0
  -1 -19  -4   -3.42   11.40   0
   1 -19   4    5.45   11.55   0
  -1 -19   4   -1.83   12.39   0
   2 -19   4   20.74   11.98   0
  -2 -19  -4  -11.19   10.91   0
  -2 -19   4   10.18   12.62   0
  -3 -19   4   92.69   12.21   0
  -3 -19  -4  102.30   12.23   0
   3 -19   4   98.57   17.99   0
   4 -19  -4   11.17   11.69   0
  -4 -19   4   10.06   11.56   0
   4 -19   4   10.15   12.10   0
  -4 -19  -4   16.92   11.05   0
  -5 -19  -4   56.56   12.19   0
   5 -19   4   60.22   13.91   0
  -5 -19   4   57.13   11.95   0
   5 -19  -4   53.44   17.33   0
   6 -19   4   57.53   18.53   0
  -6 -19   4   58.34   11.52   0
   6 -19  -4   59.08   12.11   0
   7 -19   4    9.49   21.85   0
   7 -19  -4    8.12   16.59   0
   7 -19   4    7.03   18.16   0
   7 -19  -4    6.48   12.41   0
  -7 -19  -4   21.90   11.26   0
  -7 -19   4   12.26   11.48   0
  -8 -19  -4   -4.01   11.14   0
   8 -19  -4    2.91   12.52   0
   8 -19  -4    8.72   17.35   0
   9 -19  -4    2.38   17.60   0
  -9 -19   4  -10.21   11.79   0
 -10 -19  -4   -5.41   11.43   0
   0 -20   4   99.80   13.35   0
   0 -20  -4   97.94   11.90   0
  -1 -20  -4    3.72   11.05   0
   1 -20   4   18.63   12.70   0
  -1 -20   4   40.42   11.33   0
   1 -20  -4    7.12   16.75   0
   2 -20   4    5.16   12.57   0
  -2 -20   4   10.30   11.24   0
  -2 -20  -4   17.95   11.94   0
   2 -20  -4    6.51   16.18   0
   3 -20  -4    4.92   11.87   0
   3 -20   4    4.69   11.81   0
  -3 -20   4    1.74   11.66   0
  -4 -20   4    6.93   11.68   0
  -4 -20  -4    5.71   11.40   0
   4 -20  -4    1.33   10.93   0
   4 -20   4    7.41   12.08   0
   5 -20   4   22.56   17.64   0
  -5 -20   4   33.94   11.28   0
   5 -20  -4   20.50   12.96   0
  -6 -20  -4   -5.73   12.07   0
  -6 -20   4    3.88   11.46   0
   6 -20  -4    2.43   12.10   0
   6 -20   4   -1.19   16.62   0
   7 -20   4    7.95   18.39   0
  -7 -20   4   -7.03   12.08   0
   7 -20   4    2.08   13.67   0
   7 -20  -4    9.77   12.17   0
   7 -20  -4   -7.54   18.41   0
   8 -20  -4    7.46   12.44   0
   8 -20  -4    6.21   18.03   0
  -9 -20   4    3.40   12.36   0
  -9 -20  -4   -2.06   12.07   0
   1 -21  -4  -13.24   17.31   0
  -1 -21   4    7.73   11.60   0
   1 -21   4   -2.77   11.62   0
  -1 -21  -4    6.02   11.66   0
  -2 -21   4    4.26   11.54   0
   2 -21  -4    2.49   11.71   0
  -2 -21  -4   14.09   11.17   0
   2 -21   4   10.46   11.70   0
  -3 -21   4    5.89   11.41   0
  -3 -21  -4    4.92   10.59   0
   3 -21  -4    2.33   11.62   0
   3 -21   4   16.99   12.19   0
   4 -21  -4    4.09   16.44   0
   4 -21   4   16.87   12.07   0
  -4 -21   4    9.73   11.69   0
  -4 -21  -4   -8.76   11.61   0
   5 -21   4    0.38   11.99   0
   5 -21  -4    5.29   12.43   0
  -5 -21   4   11.15   11.50   0
  -5 -21  -4   13.22   11.76   0
   6 -21   4    4.20   12.99   0
   6 -21  -4    5.14   11.93   0
   7 -21   4    0.89   13.04   0
   7 -21  -4   -2.52   13.71   0
  -7 -21  -4    0.71   11.53   0
   7 -21  -4    1.89   18.21   0
  -8 -21  -4   32.01   12.86   0
   8 -21  -4   23.04   19.54   0
   8 -21  -4   18.77   14.38   0
  -8 -21   4   45.62   12.10   0
   0 -22  -4  -12.77   17.34   0
   0 -22   4    8.99   11.84   0
   1 -22   4   14.38   12.25   0
   1 -22  -4    1.15   16.86   0
  -1 -22   4    5.20   11.90   0
  -1 -22  -4    8.32   11.67   0
  -2 -22  -4   10.72   12.09   0
  -2 -22   4    3.83   12.74   0
   2 -22  -4   -5.14   11.26   0
   2 -22   4    9.34   12.31   0
   3 -22  -4    0.61   12.58   0
   3 -22   4    3.96   12.28   0
  -3 -22  -4   -2.22   11.72   0
   4 -22  -4    4.46   11.94   0
   4 -22   4   -1.06   12.34   0
  -5 -22  -4    8.39   12.41   0
   5 -22   4   12.95   18.84   0
   5 -22  -4    1.51   12.59   0
   6 -22  -4    1.52   12.88   0
   6 -22   4    0.67   11.77   0
  -6 -22  -4   -5.50   11.79   0
  -6 -22   4   16.90   12.45   0
   1 -23   4   21.49   12.16   0
  -1 -23   4   11.20   17.52   0
   2 -23  -4    1.70   11.75   0
  -2 -23   4    2.67   12.29   0
   2 -23   4    7.81   12.52   0
   3 -23   4   -7.46   13.11   0
  -3 -23   4    8.33   12.57   0
  -3 -23  -4    8.72   12.08   0
   3 -23  -4    1.56   12.14   0
   4 -23   4    7.99   12.80   0
   4 -23  -4   -0.41   12.70   0
  -4 -23  -4   12.75   12.28   0
  -4 -23   4   -1.85   11.94   0
  -1   1  -5  562.84   37.87   0
   1  -1  -5  568.48   26.63   0
  -1  -1   5  538.10   25.13   0
   1   1  -5  578.47   25.22   0
  -1   1   5  525.56   27.88   0
   2   1  -5  182.97   25.50   0
  -2   1   5  167.04   23.70   0
  -2  -1   5  165.78   19.45   0
   2  -1  -5  183.01   23.37   0
  -3   1   5  149.01   19.27   0
   3   1  -5  137.55   17.22   0
  -3  -1   5  164.96   17.35   0
   3  -1  -5  157.28   18.93   0
   4   1  -5  333.58   18.82   0
  -4  -1   5  323.73   18.96   0
   4  -1  -5  352.63   23.08   0
  -4   1   5  317.34   19.32   0
  -5  -1   5  385.80   17.32   0
   5  -1  -5  385.24   17.42   0
  -5   1   5  401.90   18.20   0
   5   1  -5  378.13   17.50   0
  -6   1   5  800.57   26.34   0
  -6  -1   5  778.26   20.73   0
   6   1  -5  776.16   20.54   0
   6  -1  -5  753.52   21.14   0
  -7  -1   5   14.83   14.31   0
   7   1  -5   -4.68   13.63   0
   7  -1  -5   14.74   14.14   0
  -7   1   5    4.89   14.58   0
  -8  -1   5  380.31   15.76   0
  -8   1  -5  370.01   16.47   0
   8  -1  -5  399.05   19.48   0
  -8   1   5  385.39   16.58   0
   8   1  -5  381.75   16.31   0
  -9  -1  -5   57.33   12.44   0
  -9   1  -5   49.85   12.29   0
   9   1  -5   64.99   11.99   0
  -9   1   5   44.84   13.17   0
  -9  -1   5   50.46   12.03   0
   9  -1  -5   47.84   11.95   0
 -10   1  -5  599.87   17.67   0
 -10   1   5  601.59   17.64   0
  10   1  -5  533.23   16.29   0
 -10  -1   5  636.15   16.91   0
 -10  -1  -5  642.80   17.17   0
  10  -1  -5  623.65   17.53   0
 -11   1   5    7.23   17.74   0
 -11  -1   5    3.32   11.55   0
  11  -1  -5   -0.27   12.29   0
 -11  -1  -5   -0.01   12.08   0
 -11   1  -5   -0.11   11.51   0
 -12  -1  -5  246.83   17.48   0
 -12  -1   5  272.47   18.41   0
 -12   1   5  225.33   14.90   0
 -12   1  -5  219.35   14.08   0
 -13   1  -5   -4.40   12.02   0
 -13  -1   5  -12.04   12.29   0
 -13   1   5   11.97   11.12   0
 -13  -1  -5   -1.03   10.37   0
 -14  -1   5   96.07   13.30   0
 -14   1  -5  100.32   12.51   0
 -14  -1  -5   91.97   13.07   0
 -14   1   5  105.48   13.14   0
 -15  -1   5   13.72   11.80   0
 -15   1   5   21.17   11.62   0
 -15   1  -5   -6.76   10.86   0
 -15  -1  -5   12.77   11.41   0
 -16  -1   5   40.89   12.08   0
 -16   1  -5   44.12   12.53   0
 -16  -1  -5   44.37   12.17   0
 -16   1   5   42.40   12.37   0
 -17  -1  -5   -0.99   11.70   0
 -17   1  -5    6.68   12.11   0
 -17   1   5    0.02   12.34   0
 -17  -1   5   -5.61   12.26   0
   0   2  -5  295.64   23.14   0
   0  -2   5  268.02   23.29   0
   1   2  -5   89.95   18.14   0
  -1   2  -5   89.33   22.34   0
   1  -2   5   83.83   22.64   0
  -1  -2   5   92.23   19.30   0
   2  -2  -5   55.87   21.46   0
   2   2  -5   52.56   16.23   0
  -2  -2   5   57.66   16.41   0
  -2   2  -5   45.00   21.57   0
  -2   2   5   49.12   21.82   0
  -3  -2   5  714.24   22.23   0
   3  -2  -5  722.37   24.95   0
  -3   2   5  708.68   25.60   0
   3   2  -5  726.36   21.50   0
  -4   2   5 1650.55   31.31   0
  -4  -2   5 1659.81   26.82   0
   4   2  -5 1718.84   30.58   0
   4  -2  -5 1735.44   31.23   0
  -5   2   5   42.99   14.40   0
   5  -2  -5   45.51   14.80   0
  -5  -2   5   30.34   15.02   0
   5   2  -5   34.90   13.91   0
   6   2  -5  360.09   17.21   0
  -6  -2   5  366.02   17.56   0
   6  -2  -5  384.98   18.54   0
  -6   2   5  357.14   19.03   0
   7  -2  -5  194.87   15.34   0
  -7   2  -5  171.17   16.20   0
  -7  -2   5  200.28   15.45   0
   7   2  -5  193.14   20.15   0
  -7   2   5  186.31   16.69   0
  -8   2   5   56.36   12.81   0
   8  -2  -5   68.17   12.37   0
  -8  -2   5   61.63   13.02   0
   8   2  -5   51.64   12.40   0
  -8   2  -5   45.88   12.78   0
   9  -2  -5   71.36   12.86   0
   9   2  -5   80.10   12.44   0
  -9  -2   5   63.79   12.00   0
  -9   2   5   71.49   13.19   0
  -9  -2  -5   41.27   12.18   0
  -9   2  -5   48.50   11.95   0
 -10  -2   5    1.27   11.14   0
 -10   2  -5   -0.71   11.79   0
  10   2  -5    9.49   10.89   0
 -10   2   5    2.83   12.46   0
  10  -2  -5   11.24   12.28   0
 -10  -2  -5    7.73   10.86   0
 -11   2  -5   35.86   12.24   0
 -11   2   5   43.84   12.31   0
  11  -2  -5   40.92   12.75   0
 -11  -2   5   23.69   12.24   0
 -11  -2  -5   42.18   11.08   0
 -12   2  -5  115.78   13.67   0
 -12  -2   5  136.96   13.01   0
 -12   2   5  112.54   13.50   0
 -12  -2  -5   89.46   12.39   0
 -13   2   5    4.97   11.94   0
 -13  -2  -5   -8.07   10.98   0
 -13   2  -5    2.64   12.15   0
 -13  -2   5   11.34   11.48   0
 -14  -2   5   -4.29   11.80   0
 -14  -2  -5    2.54   10.85   0
 -14   2  -5   -3.79   11.75   0
 -14   2   5    4.71   12.20   0
 -15   2  -5   -1.17   12.30   0
 -15  -2   5   12.89   16.25   0
 -15   2   5    8.98   11.21   0
 -15  -2  -5    2.59   11.63   0
 -16  -2   5   10.98   12.00   0
 -16   2  -5    3.94   12.08   0
 -16   2   5   -1.42   12.49   0
 -16  -2  -5    8.34   11.49   0
 -17   2  -5    4.65   12.67   0
 -17  -2  -5   13.47   11.89   0
 -17  -2   5    5.25   12.42   0
 -17   2   5    3.37   12.44   0
  -1  -3   5  581.54   24.66   0
   1   3  -5  610.68   24.38   0
  -1   3  -5  615.05   27.19   0
   1  -3   5  593.41   33.89   0
  -2  -3   5   73.44   15.46   0
   2  -3   5   78.09   20.39   0
   2  -3  -5   85.56   28.67   0
  -2   3  -5   88.99   26.18   0
   2   3  -5   85.20   15.43   0
  -3   3  -5   13.29   17.89   0
   3   3  -5   26.90   13.89   0
  -3  -3   5   25.33   14.11   0
   3  -3  -5   10.54   17.08   0
  -4  -3   5   67.55   14.60   0
  -4   3   5   74.63   17.66   0
   4   3  -5   82.18   14.45   0
   4  -3  -5   86.05   16.01   0
   5   3  -5  110.05   15.43   0
  -5   3   5  111.15   16.01   0
   5  -3  -5   87.91   15.80   0
  -5  -3   5  122.71   15.04   0
   6   3  -5  728.98   19.29   0
   6  -3  -5  721.23   22.41   0
  -6  -3   5  715.86   20.04   0
  -6   3   5  471.57   20.52   0
  -7   3   5   33.65   14.33   0
   7  -3  -5   35.51   13.12   0
  -7  -3   5   31.96   14.19   0
  -7   3  -5   41.45   14.29   0
   7   3  -5   43.85   14.33   0
  -8   3  -5  851.57   23.96   0
   8   3  -5  970.20   18.68   0
  -8  -3   5 1000.66   23.27   0
   8  -3  -5  980.66   21.43   0
  -8   3   5  869.69   20.55   0
  -9   3   5    9.96   11.58   0
  -9  -3  -5    4.09   16.12   0
  -9  -3   5   -2.73   11.28   0
   9  -3  -5   -5.19   11.48   0
   9   3  -5   -4.94   11.15   0
  -9   3  -5    2.95   11.65   0
 -10  -3   5  205.80   17.17   0
 -10   3  -5  169.25   14.20   0
 -10  -3  -5  178.93   13.43   0
 -10   3   5  156.62   13.86   0
  10  -3  -5  209.38   18.84   0
 -11   3  -5    8.68   17.06   0
 -11  -3  -5    3.96   11.22   0
 -11   3   5   12.56   11.64   0
  11  -3  -5   -0.38   11.90   0
 -11  -3   5    2.10   11.36   0
 -12  -3  -5   48.32   11.74   0
 -12   3   5   42.68   12.70   0
 -12   3  -5   31.69   12.51   0
 -12  -3   5   35.94   11.88   0
 -13  -3   5    8.45   10.90   0
 -13   3   5   -0.04   12.53   0
 -13  -3  -5   -6.78   11.67   0
 -13   3  -5    3.58   12.04   0
 -14   3  -5   96.37   13.12   0
 -14   3   5   34.71   12.65   0
 -14  -3   5   43.65   11.98   0
 -14  -3  -5   96.97   12.25   0
 -15  -3  -5   -0.16   11.49   0
 -15   3  -5    3.14   11.61   0
 -15   3   5    3.56   11.18   0
 -15  -3   5   -0.75   10.87   0
 -16  -3   5   41.36   12.51   0
 -16  -3  -5   43.99   12.50   0
 -16   3  -5   51.23   18.04   0
 -16   3   5   34.16   12.52   0
 -17   3  -5    2.52   12.63   0
 -17  -3  -5    9.05   12.68   0
 -17   3   5   -2.94   12.61   0
 -17  -3   5   12.53   12.51   0
   0  -4   5 1474.04   31.81   0
   0   4  -5 1506.62   32.07   0
  -1  -4   5  879.42   24.68   0
  -1   4  -5  907.17   28.92   0
   1  -4   5  836.23   28.23   0
   1   4  -5  901.89   24.42   0
   2   4  -5   97.46   15.88   0
  -2   4  -5   87.78   17.53   0
   2  -4   5   92.20   19.14   0
  -2  -4   5   92.88   15.92   0
  -3  -4   5   96.54   15.21   0
   3   4  -5   97.02   20.52   0
  -3   4  -5   89.44   18.02   0
   3  -4  -5  101.46   24.11   0
  -4  -4   5  929.64   20.57   0
   4  -4  -5  873.23   24.93   0
  -4   4  -5  862.96   38.07   0
   4   4  -5  864.65   20.72   0
   5   4  -5  305.19   16.77   0
  -5  -4   5  204.63   16.31   0
  -5   4   5  280.53   19.69   0
   5  -4  -5  298.75   18.96   0
   6  -4  -5  276.63   18.40   0
  -6   4   5  261.91   19.37   0
   6   4  -5  290.14   16.03   0
  -6   4  -5  257.39   21.65   0
  -6  -4   5  285.38   16.02   0
  -7   4  -5  158.61   17.53   0
   7   4  -5  146.53   14.59   0
  -7  -4   5  179.62   14.58   0
  -7   4   5  152.92   16.62   0
   7  -4  -5  166.45   14.38   0
   8   4  -5  199.56   13.31   0
  -8   4   5  199.13   20.13   0
  -8   4  -5  183.60   16.94   0
  -8  -4   5  212.30   13.47   0
   8  -4  -5  202.59   14.10   0
  -9   4  -5  147.90   14.62   0
  -9   4   5  165.84   19.35   0
   9  -4  -5  177.93   13.58   0
  -9  -4   5  159.18   12.84   0
  -9  -4  -5  167.01   12.88   0
 -10   4  -5   31.96   12.36   0
  10  -4  -5   35.27   11.41   0
 -10  -4  -5   43.40   11.63   0
 -10  -4   5   22.15   12.27   0
 -10   4   5   36.43   12.37   0
 -11   4  -5   17.89   12.35   0
 -11  -4  -5   24.52   11.18   0
 -11   4   5    9.91   13.04   0
 -11  -4   5   -4.66   11.89   0
  11  -4  -5    7.59   12.30   0
 -12  -4   5    8.62   11.85   0
 -12  -4  -5   -3.62   11.54   0
 -12   4   5   -0.61   12.48   0
 -12   4  -5    9.98   16.74   0
 -13  -4  -5   44.69   11.37   0
 -13   4  -5   34.71   16.72   0
 -13  -4   5   33.76   11.82   0
 -13   4   5   26.49   13.15   0
 -14  -4   5    0.44   16.24   0
 -14   4   5    0.20   11.91   0
 -14  -4  -5  -15.84   16.04   0
 -14   4  -5    2.82   12.17   0
 -15   4   5    3.62   12.33   0
 -15  -4  -5   -1.62   11.11   0
 -15   4  -5    6.97   11.72   0
 -15  -4   5   -0.46   11.33   0
 -16  -4   5   -0.17   11.76   0
 -16  -4  -5    1.44   16.06   0
 -16   4   5    1.03   12.34   0
 -16   4  -5    5.07   12.15   0
 -17   4  -5    7.85   17.58   0
 -17   4   5   11.68   12.35   0
 -17  -4   5    4.77   12.19   0
 -17  -4  -5   10.20   12.01   0
  -1   5  -5  798.02   26.07   0
   1  -5   5  782.88   26.41   0
  -1  -5   5  750.97   22.94   0
   1   5  -5  815.13   28.00   0
   2  -5   5  258.86   20.98   0
  -2  -5   5  311.98   17.91   0
   2   5  -5  311.54   17.67   0
  -2   5  -5  296.35   21.21   0
   3   5  -5   55.65   14.28   0
   3  -5   5   52.69   17.68   0
  -3   5  -5   61.20   21.35   0
  -3  -5   5   50.86   14.21   0
   4   5  -5   51.49   13.69   0
  -4   5  -5   37.97   21.43   0
   4  -5  -5   33.58   16.38   0
  -4  -5   5   45.91   14.03   0
   5   5  -5   20.11   14.43   0
   5  -5  -5   21.35   14.99   0
  -5  -5   5   25.91   14.74   0
   6  -5  -5  548.19   20.84   0
   6   5  -5  545.83   17.06   0
  -6   5  -5  351.36   32.88   0
  -6  -5   5  315.21   15.65   0
  -6   5  -5  382.37   37.42   0
   7   5  -5    6.47   12.75   0
  -7   5  -5    4.04   13.92   0
  -7   5   5    9.60   13.89   0
   7  -5  -5   -4.34   12.91   0
  -7  -5   5   21.16   12.54   0
  -8   5  -5  400.97   23.94   0
  -8   5   5  482.71   19.14   0
   8  -5  -5  503.01   17.76   0
  -8  -5   5  508.85   15.11   0
   8   5  -5  535.40   15.12   0
  -9   5   5   33.05   13.12   0
  -9   5  -5   35.42   12.40   0
   9  -5  -5   39.61   16.72   0
  -9  -5   5   58.39   11.59   0
  -9  -5  -5   49.57   11.93   0
 -10  -5   5  215.71   13.05   0
 -10   5  -5  315.27   22.87   0
 -10  -5  -5  340.48   13.87   0
  10  -5  -5  332.96   16.55   0
 -10   5   5  299.75   16.77   0
  11  -5  -5    3.38   11.40   0
 -11   5  -5    0.53   12.37   0
 -11   5   5    3.94   12.22   0
 -11  -5  -5   -4.26   11.17   0
 -11  -5   5   12.25   11.98   0
 -12  -5   5   65.96   12.17   0
 -12  -5  -5   56.85   11.36   0
 -12   5   5   59.09   13.92   0
 -12   5  -5   60.47   13.45   0
 -13  -5  -5   -6.02   15.37   0
 -13   5  -5    4.24   16.41   0
 -13   5   5   11.15   11.84   0
 -13  -5   5   10.20   11.38   0
 -14  -5  -5  131.16   12.41   0
 -14   5   5  119.44   14.77   0
 -14  -5   5  143.89   12.71   0
 -14   5  -5  124.18   19.88   0
 -15  -5   5    9.69   11.01   0
 -15  -5  -5    4.59   11.31   0
 -15   5   5    2.89   12.75   0
 -15   5  -5   -0.82   11.75   0
 -16   5  -5   55.81   14.86   0
 -16  -5   5   30.61   12.06   0
 -16  -5  -5   96.99   13.47   0
 -16   5   5  112.43   15.17   0
   0   6  -5  272.61   16.86   0
   0  -6   5  271.70   17.07   0
   1  -6   5  353.02   20.02   0
  -1   6  -5  327.73   19.09   0
  -1  -6   5  351.64   17.69   0
   1   6  -5  314.90   16.79   0
   2  -6   5   88.40   16.41   0
   2   6  -5   85.88   14.50   0
  -2   6  -5   84.07   15.67   0
  -2  -6   5   93.04   14.35   0
  -3  -6   5   37.58   13.22   0
   3   6  -5   35.71   13.77   0
   3  -6   5   35.05   21.62   0
  -3   6  -5   38.98   14.96   0
   4   6  -5   -4.67   14.42   0
  -4  -6   5    8.26   14.52   0
   4  -6  -5    0.73   17.09   0
   5   6  -5   -0.18   14.27   0
   5  -6  -5    6.57   16.18   0
  -5  -6   5   30.82   14.63   0
   6   6  -5  405.98   15.29   0
   6  -6  -5  427.45   19.87   0
  -6  -6   5  407.37   15.77   0
   7  -6  -5   50.07   13.04   0
  -7  -6   5   62.86   12.47   0
   7   6  -5   49.62   11.82   0
   8  -6  -5   25.59   12.40   0
  -8  -6   5    9.97   12.17   0
  -9   6   5   49.84   14.61   0
  -9  -6  -5   46.36   11.41   0
  -9  -6   5   39.85   12.63   0
   9  -6  -5   51.26   12.89   0
 -10  -6   5   17.66   12.79   0
 -10  -6  -5   10.77   12.52   0
 -10   6   5    8.68   12.85   0
  10  -6  -5    9.22   11.52   0
 -10   6  -5    2.80   13.02   0
  11  -6  -5    6.12   11.37   0
 -11   6  -5    6.25   18.44   0
 -11  -6  -5    9.29   12.11   0
 -11   6   5    2.81   12.34   0
 -12   6   5   14.47   13.37   0
 -12  -6  -5   18.86   11.32   0
 -12   6  -5    6.20   12.58   0
 -12  -6   5   11.24   10.82   0
 -13   6   5   -7.14   12.79   0
 -13  -6  -5    9.33   11.01   0
 -13   6  -5   -0.59   12.51   0
 -13  -6   5   15.50   10.42   0
 -14   6   5    9.68   12.50   0
 -14  -6  -5    4.80   11.00   0
 -14   6  -5    7.59   12.85   0
 -14  -6   5   29.90   11.15   0
 -15   6  -5   -1.09   11.99   0
 -15   6   5   -1.81   12.73   0
 -15  -6   5   25.97   11.23   0
 -15  -6  -5    2.30   11.19   0
 -16  -6   5   26.62   12.38   0
 -16   6   5    2.87   13.36   0
 -16  -6  -5    5.52   11.78   0
 -16   6  -5    9.56   13.29   0
  -1  -7   5    4.20   13.25   0
  -1   7  -5    4.90   12.79   0
   1   7  -5   -8.42   13.67   0
   1  -7   5    2.45   14.20   0
  -2  -7   5   22.84   14.86   0
  -2   7  -5   21.68   14.31   0
   2  -7   5   25.89   14.44   0
   2   7  -5   33.72   14.43   0
   3   7  -5   14.12   14.30   0
  -3  -7   5   -0.97   20.23   0
   3  -7   5    6.68   14.65   0
  -4  -7   5  106.60   16.04   0
   4  -7  -5  120.40   18.91   0
   4  -7   5   92.97   21.02   0
   4   7  -5  108.27   14.56   0
   5   7  -5   17.82   13.62   0
  -5  -7   5    6.72   13.84   0
   5  -7  -5   20.15   15.72   0
  -6  -7   5  301.05   14.17   0
   6  -7  -5  295.00   17.17   0
   7  -7  -5   61.27   13.83   0
  -7  -7   5   50.30   12.83   0
  -8  -7   5  417.70   14.88   0
   8  -7  -5  417.11   17.75   0
   9  -7  -5   27.62   11.69   0
  -9  -7  -5   26.98   11.79   0
  -9  -7   5   50.79   17.29   0
  10  -7  -5   87.81   18.01   0
 -10  -7   5   58.92   13.00   0
 -10  -7  -5   88.39   17.32   0
  11  -7  -5   -4.09   12.46   0
 -11  -7  -5   -9.68   11.12   0
 -11  -7   5    9.66   11.54   0
 -12  -7   5   86.11   12.25   0
 -12  -7  -5   96.27   11.94   0
 -13  -7  -5   -2.70   11.04   0
 -13  -7   5   -5.38   11.50   0
 -14  -7  -5   66.64   11.83   0
 -14  -7   5   37.98   12.24   0
 -15  -7  -5   -7.67   11.28   0
 -15  -7   5   -1.68   11.43   0
 -16  -7   5   15.35   11.78   0
 -16  -7  -5   18.20   11.99   0
   0  -8   5  564.07   24.44   0
   0   8  -5  502.12   18.30   0
   1   8  -5  226.47   16.48   0
  -1  -8   5  117.46   15.85   0
   1  -8   5  225.92   17.27   0
   2  -8   5  383.99   19.19   0
  -2  -8   5  371.91   17.39   0
   2   8  -5  350.40   17.25   0
  -3  -8   5  163.10   15.56   0
   3   8  -5  155.19   14.86   0
   3  -8   5  164.80   17.88   0
   4  -8   5   24.51   23.40   0
  -4  -8   5   34.92   13.78   0
   5  -8  -5   61.32   15.35   0
  -5  -8   5   61.49   12.77   0
   6  -8  -5   64.17   15.04   0
  -6  -8   5   50.31   11.87   0
  -7  -8   5   -0.51   11.70   0
   7  -8  -5    6.03   12.10   0
   8  -8  -5  365.65   17.62   0
  -8  -8   5  368.05   14.58   0
  -9  -8   5   28.32   12.00   0
   9  -8  -5   51.87   13.11   0
  -9  -8  -5   49.01   12.90   0
 -10  -8  -5   44.75   17.05   0
 -10  -8   5   32.52   12.00   0
  10  -8  -5   37.40   13.33   0
 -11  -8   5   24.29   11.87   0
 -11  -8  -5   34.54   11.80   0
  11  -8  -5   25.55   12.50   0
 -12  -8  -5   87.03   12.14   0
 -12  -8   5   92.25   11.97   0
 -13  -8   5   13.43   10.78   0
 -13  -8  -5   21.68   11.47   0
 -14  -8   5   11.01   11.39   0
 -14  -8  -5   11.15   10.84   0
 -15  -8  -5    7.04   11.69   0
 -15  -8   5   -0.69   11.98   0
 -16  -8   5    3.34   12.81   0
 -16  -8  -5    8.72   11.39   0
  -1  -9   5   73.98   15.51   0
   1  -9   5   65.67   15.98   0
  -2  -9   5    1.69   14.01   0
   2  -9   5   12.96   13.42   0
  -3  -9   5  409.31   17.06   0
   3  -9   5  409.10   20.60   0
  -4  -9   5  -12.35   12.30   0
   4  -9   5    1.04   14.40   0
  -5  -9   5   -2.27   11.52   0
   5  -9  -5    7.85   13.55   0
  -6  -9   5  123.06   12.27   0
   6  -9  -5  114.03   15.74   0
   7  -9  -5  249.15   15.97   0
  -7  -9   5  258.98   13.63   0
   8  -9  -5  169.56   14.98   0
  -8  -9   5  150.91   12.80   0
  -9  -9  -5   -4.49   12.50   0
   9  -9  -5    4.22   18.00   0
  -9  -9   5   11.39   11.31   0
 -10  -9  -5  103.27   12.88   0
  10  -9  -5  136.89   15.38   0
 -10  -9   5  144.02   12.56   0
 -11  -9   5   27.94   11.61   0
  11  -9  -5   21.27   12.31   0
 -11  -9  -5   19.59   11.80   0
 -12  -9   5   16.43   11.74   0
 -12  -9  -5   18.42   11.19   0
 -13  -9  -5    5.16   11.18   0
 -14  -9   5   26.61   11.22   0
 -14  -9  -5   25.34   11.24   0
 -15  -9  -5    4.25   10.83   0
 -15  -9   5    2.97   11.70   0
 -16  -9   5   19.03   11.62   0
   0 -10   5 1064.72   22.41   0
   1 -10   5   41.94   13.21   0
  -1 -10   5    3.38   13.71   0
  -2 -10   5  763.33   19.08   0
   2 -10   5  771.80   21.77   0
  -3 -10   5  261.24   14.92   0
   3 -10   5  266.36   17.39   0
  -4 -10   5  376.77   15.45   0
   4 -10   5  268.48   18.83   0
   5 -10   5    3.93   14.44   0
  -5 -10   5   15.94   12.25   0
  -6 -10   5  171.92   12.93   0
   6 -10  -5  150.57   14.77   0
   7 -10  -5   11.72   12.34   0
  -7 -10   5   12.79   11.81   0
  -8 -10   5   16.56   11.73   0
   8 -10  -5   31.73   12.22   0
   9 -10  -5   11.52   12.76   0
  -9 -10   5   -8.60   10.89   0
  -9 -10  -5   12.70   11.65   0
 -10 -10  -5    7.62   11.77   0
  10 -10  -5   22.97   17.86   0
 -10 -10   5   45.34   11.95   0
  11 -10  -5    6.89   11.40   0
 -11 -10  -5   24.66   11.80   0
 -11 -10   5   16.19   11.47   0
 -12 -10  -5    3.43   11.55   0
 -13 -10  -5   24.33   15.99   0
 -13 -10   5   16.72   12.13   0
 -14 -10   5   33.07   11.72   0
 -14 -10  -5   31.53   11.94   0
 -15 -10   5   12.09   12.24   0
 -15 -10  -5   17.69   11.19   0
  -1 -11   5   23.87   13.17   0
   1 -11   5   24.22   13.73   0
   2 -11   5   53.14   17.41   0
  -2 -11   5   67.21   13.14   0
  -3 -11   5   75.60   12.55   0
   3 -11   5   71.04   13.67   0
  -4 -11   5  201.64   14.05   0
   4 -11   5  186.87   21.28   0
   5 -11   5    0.74   12.41   0
  -5 -11   5    2.32   11.68   0
   6 -11  -5    2.58   12.70   0
  -6 -11   5   12.05   11.95   0
  -7 -11   5   68.96   11.92   0
   7 -11  -5   47.25   13.32   0
   8 -11  -5   24.93   13.34   0
  -8 -11   5   12.74   15.79   0
   9 -11  -5   55.99   13.59   0
  -9 -11   5   87.40   11.77   0
  -9 -11  -5   71.27   11.79   0
  10 -11  -5  196.48   17.68   0
 -10 -11  -5  211.82   12.99   0
 -10 -11   5  217.53   13.55   0
 -11 -11   5    6.19   11.24   0
  11 -11  -5   -0.70   12.04   0
 -11 -11  -5    9.35   11.71   0
 -12 -11   5   -4.27   11.94   0
 -13 -11  -5  -15.23   11.47   0
 -13 -11   5   11.89   11.42   0
 -14 -11  -5  -10.67   11.16   0
 -14 -11   5  -19.01   11.82   0
 -15 -11   5    6.96   11.88   0
 -15 -11  -5   16.25   12.73   0
   0 -12   5  305.32   14.78   0
  -1 -12   5   -1.73   11.86   0
   1 -12   5   -2.07   12.37   0
  -2 -12   5  236.65   13.61   0
   2 -12   5  225.44   15.06   0
  -3 -12   5   38.43   11.66   0
   3 -12   5   28.87   12.20   0
  -4 -12   5  175.54   12.49   0
   4 -12   5  165.53   14.83   0
   5 -12   5   61.24   18.65   0
  -5 -12   5   62.85   12.47   0
   6 -12  -5   67.62   14.19   0
  -6 -12   5   10.30   11.76   0
   7 -12  -5   45.07   13.56   0
  -7 -12   5   55.12   11.70   0
  -8 -12   5   -4.39   10.63   0
   8 -12  -5    4.16   12.93   0
  -8 -12  -5  -10.00   11.19   0
  -9 -12   5   16.49   11.58   0
  -9 -12  -5   18.37   11.63   0
   9 -12  -5   10.74   17.34   0
 -10 -12   5   34.31   11.18   0
  10 -12  -5   25.35   13.10   0
 -10 -12  -5   25.56   11.80   0
 -11 -12   5    4.25   11.27   0
 -12 -12  -5    9.04   11.56   0
 -12 -12   5   -4.16   11.44   0
 -13 -12  -5   18.11   11.59   0
 -13 -12   5   17.51   12.27   0
 -14 -12   5   29.44   11.23   0
 -14 -12  -5    2.99   11.62   0
  -1 -13   5   23.80   11.69   0
   1 -13   5    6.10   12.65   0
  -2 -13   5    0.87   12.29   0
   2 -13   5    0.89   12.19   0
  -3 -13   5   94.32   13.29   0
   3 -13   5   72.89   13.25   0
   4 -13   5   71.48   12.67   0
  -4 -13   5   74.61   12.16   0
  -5 -13   5  164.34   13.42   0
   5 -13   5  176.61   20.20   0
   6 -13   5    4.42   18.81   0
   6 -13  -5    9.39   12.83   0
   7 -13  -5   20.89   12.99   0
  -7 -13   5   18.04   11.33   0
   8 -13  -5    4.47   12.53   0
  -8 -13  -5   16.54   11.78   0
  -8 -13   5   19.97   12.12   0
  -9 -13   5  106.90   12.47   0
  -9 -13  -5  108.41   12.92   0
   9 -13  -5   84.08   14.80   0
  10 -13  -5  127.48   22.02   0
 -11 -13   5    9.92   11.51   0
 -12 -13   5   -0.72   11.50   0
 -13 -13  -5    4.41   12.27   0
 -14 -13  -5    6.60   12.01   0
   0 -14   5 1207.13   21.21   0
  -1 -14   5   99.70   12.01   0
   1 -14   5   55.33   13.34   0
   2 -14   5  117.32   13.46   0
  -2 -14   5  123.32   11.88   0
  -3 -14   5   -2.99   11.70   0
   3 -14   5   12.22   11.88   0
  -4 -14   5  244.95   14.31   0
   4 -14   5  209.81   16.14   0
   5 -14   5  197.97   16.66   0
  -5 -14   5  181.42   12.84   0
   6 -14   5  231.98   25.87   0
  -6 -14   5  138.97   11.94   0
  -7 -14   5   20.13   11.77   0
   7 -14  -5   -1.81   12.95   0
  -8 -14   5   18.76   11.54   0
   8 -14  -5   33.53   12.70   0
  -9 -14   5   28.70   11.11   0
   9 -14  -5   18.65   17.18   0
 -10 -14  -5   83.57   11.38   0
  10 -14  -5   48.55   16.66   0
 -11 -14   5   20.40   11.28   0
 -12 -14   5    3.09   11.53   0
 -12 -14  -5   -0.90   11.42   0
 -13 -14  -5    7.76   11.86   0
 -14 -14  -5    8.87   11.55   0
   1 -15   5   -3.19   12.94   0
  -1 -15   5   -3.62   10.69   0
   2 -15   5   12.87   12.30   0
  -2 -15   5   -0.75   11.92   0
   3 -15   5   -7.87   15.83   0
  -3 -15   5   15.33   12.41   0
  -4 -15   5   40.76   12.02   0
   4 -15   5   33.53   12.38   0
  -5 -15   5   23.77   12.08   0
   5 -15   5   25.73   13.01   0
  -6 -15   5   40.50   12.28   0
   6 -15   5   25.30   13.21   0
  -7 -15   5   35.71   12.25   0
  -7 -15  -5   37.22   11.40   0
   7 -15  -5   24.67   12.58   0
  -8 -15  -5  -12.27   11.17   0
   8 -15  -5   14.63   11.40   0
  -8 -15   5    3.01   11.55   0
   9 -15  -5    3.22   11.80   0
  -9 -15  -5   -2.77   10.74   0
  -9 -15   5  -13.60   10.76   0
 -10 -15  -5    3.56   11.31   0
 -11 -15   5   -7.81   11.15   0
 -11 -15  -5   20.55   11.39   0
 -12 -15  -5   21.98   11.74   0
 -12 -15   5   14.71   11.59   0
 -13 -15  -5   -0.66   11.74   0
   0 -16   5  202.18   13.83   0
   1 -16   5   15.73   11.85   0
  -1 -16   5    9.93   12.00   0
   2 -16   5  236.88   14.78   0
  -2 -16   5  228.73   13.77   0
  -3 -16   5    9.31   12.05   0
   3 -16   5   10.92   17.47   0
  -4 -16   5  381.84   14.47   0
   4 -16   5  374.75   17.69   0
  -5 -16   5   -0.11   11.72   0
   5 -16   5   12.33   17.20   0
  -6 -16  -5   11.75   11.83   0
   6 -16   5    2.37   12.13   0
  -6 -16   5   11.26   11.85   0
  -7 -16   5    6.18   11.18   0
   7 -16  -5    3.25   11.93   0
   8 -16  -5   13.27   12.38   0
  -9 -16   5   26.83   10.92   0
   9 -16  -5   11.02   12.90   0
 -11 -16  -5    4.91   11.33   0
 -11 -16   5  -11.81   11.22   0
 -12 -16  -5  -10.64   11.82   0
 -12 -16   5   -2.44   11.70   0
   1 -17   5   11.67   11.89   0
  -1 -17   5   -1.20   12.18   0
   2 -17   5   35.56   11.74   0
  -2 -17   5   28.52   13.07   0
  -3 -17   5   10.50   11.65   0
   3 -17   5   33.60   12.21   0
  -4 -17   5   -0.82   11.45   0
   4 -17   5    8.27   11.82   0
  -5 -17   5   17.03   11.37   0
   5 -17   5    6.67   12.16   0
   6 -17   5   60.86   14.43   0
  -6 -17   5   71.69   12.28   0
  -6 -17  -5   73.75   12.14   0
  -7 -17   5   22.60   11.64   0
  -7 -17  -5    6.59   11.37   0
   7 -17  -5    7.86   12.40   0
  -8 -17  -5    0.14   11.30   0
   8 -17  -5    2.31   12.39   0
  -8 -17   5   -3.29   11.43   0
   9 -17  -5    0.22   16.90   0
  -9 -17   5   -1.00   11.40   0
  -9 -17  -5    6.08   11.38   0
   9 -17  -5    2.71   12.44   0
 -10 -17   5   72.34   12.11   0
 -11 -17  -5    6.47   11.54   0
 -12 -17  -5  -12.44   12.00   0
 -12 -17   5   10.01   11.52   0
   0 -18   5   16.34   11.91   0
  -1 -18   5    4.85   12.49   0
   1 -18   5   16.23   12.42   0
   2 -18   5  157.05   17.83   0
  -2 -18   5  165.11   12.72   0
  -3 -18   5   36.10   11.34   0
   3 -18   5    8.83   12.42   0
   4 -18   5   37.22   12.08   0
  -4 -18   5   68.51   11.80   0
  -5 -18   5   38.05   12.20   0
  -5 -18  -5   27.04   12.05   0
   5 -18   5   35.20   12.93   0
  -6 -18  -5   59.73   12.10   0
  -6 -18   5   21.36   11.61   0
   6 -18   5   35.64   13.31   0
  -7 -18  -5    3.62   11.37   0
   7 -18  -5    4.66   18.54   0
  -8 -18   5   47.48   11.75   0
   8 -18  -5   37.29   12.98   0
   8 -18  -5   39.78   12.92   0
   9 -18  -5   14.28   18.71   0
   9 -18  -5   18.03   18.50   0
 -10 -18   5   80.82   12.08   0
 -10 -18  -5   56.74   11.83   0
 -11 -18  -5   -7.21   11.90   0
   1 -19   5    5.38   11.98   0
  -1 -19   5   -0.03   12.48   0
  -2 -19   5   55.95   11.75   0
   2 -19   5   24.78   12.84   0
  -3 -19   5  -11.00   11.35   0
  -3 -19  -5    2.92   10.90   0
   3 -19   5   -0.75   11.72   0
  -4 -19  -5   -1.65   11.19   0
  -4 -19   5    9.50   11.42   0
   4 -19   5    4.95   11.80   0
   5 -19   5   -1.83   12.29   0
  -5 -19  -5   12.99   11.98   0
  -5 -19   5   13.91   11.44   0
   6 -19  -5    7.02   13.19   0
   6 -19   5    9.67   12.11   0
   7 -19  -5    8.62   11.72   0
  -7 -19   5   23.31   12.54   0
   7 -19  -5    2.54   12.87   0
  -8 -19   5    6.43   12.22   0
   8 -19  -5    3.37   17.76   0
  -8 -19  -5    4.27   11.07   0
   8 -19  -5    0.32   17.00   0
   9 -19  -5    3.98   12.06   0
  -9 -19  -5    4.25   11.16   0
   9 -19  -5    1.79   12.73   0
 -10 -19   5   28.43   12.28   0
 -10 -19  -5    9.63   12.32   0
   0 -20   5   87.62   17.52   0
   1 -20   5   10.31   11.07   0
  -1 -20   5   -0.44   11.03   0
  -1 -20  -5    3.52   10.82   0
  -2 -20  -5   49.77   12.13   0
  -2 -20   5   59.10   11.62   0
   2 -20   5   59.51   12.17   0
  -3 -20   5   -2.07   11.74   0
   3 -20   5    2.35   12.76   0
  -4 -20   5   57.43   12.23   0
  -4 -20  -5   55.67   11.51   0
   4 -20   5   49.96   13.39   0
   4 -20  -5   67.93   13.10   0
   5 -20  -5    2.77   12.08   0
  -5 -20   5   -4.50   10.85   0
   5 -20   5   -1.72   17.33   0
   6 -20   5    3.88   12.87   0
  -6 -20  -5   -2.16   11.66   0
   6 -20  -5    6.62   12.03   0
  -6 -20   5   -1.12   11.53   0
   7 -20  -5   -5.21   12.71   0
   7 -20  -5    1.13   12.07   0
  -7 -20   5  -10.04   11.85   0
  -7 -20  -5    9.05   11.66   0
   8 -20  -5   32.37   13.06   0
   8 -20  -5   39.01   14.62   0
  -9 -20  -5   -3.38   12.48   0
  -9 -20   5   -0.42   11.72   0
   9 -20  -5    1.63   12.39   0
   9 -20  -5    2.97   17.80   0
  -1 -21  -5   15.29   11.80   0
  -1 -21   5   41.07   18.15   0
   1 -21   5   45.54   12.66   0
   1 -21  -5   32.08   12.19   0
   2 -21  -5   16.49   11.77   0
   2 -21   5   34.84   12.30   0
  -2 -21   5   40.46   11.80   0
  -2 -21  -5   24.34   11.80   0
   3 -21  -5   10.79   11.67   0
   3 -21   5   13.44   12.34   0
  -3 -21   5    2.62   11.56   0
   4 -21   5   18.15   12.56   0
  -4 -21  -5    7.61   11.81   0
  -4 -21   5   11.13   11.36   0
   4 -21  -5   18.91   12.65   0
  -5 -21   5   10.90   11.85   0
   5 -21  -5    7.37   11.95   0
   5 -21   5   -0.15   11.96   0
  -6 -21   5   -3.32   11.52   0
  -6 -21  -5   12.39   12.27   0
   6 -21  -5    2.44   12.16   0
   6 -21   5    4.55   13.01   0
  -7 -21  -5   33.43   16.66   0
   7 -21  -5    5.70   18.62   0
   7 -21   5    1.06   13.24   0
   7 -21   5    2.27   22.99   0
   7 -21  -5    0.21   18.47   0
  -8 -21   5   16.79   11.93   0
   8 -21  -5   -2.83   11.90   0
   8 -21  -5    2.97   12.20   0
  -8 -21  -5  -10.56   12.00   0
   0 -22   5   15.47   17.28   0
   0 -22  -5   25.60   12.16   0
  -1 -22  -5   14.88   11.38   0
  -1 -22   5    8.44   11.86   0
   1 -22  -5   -1.08   11.83   0
   1 -22   5   -4.61   11.55   0
   2 -22  -5   55.52   16.52   0
  -2 -22  -5   55.53   11.80   0
  -2 -22   5   79.76   12.73   0
   2 -22   5   52.05   13.30   0
   3 -22   5   -3.37   12.11   0
   3 -22  -5    7.31   12.05   0
  -3 -22  -5   -2.98   12.16   0
  -4 -22   5   25.98   12.03   0
   4 -22  -5   27.37   12.74   0
   4 -22   5   19.77   13.13   0
   5 -22   5    3.41   12.67   0
  -5 -22  -5   -0.51   11.33   0
   5 -22  -5    3.97   11.70   0
   6 -22   5   21.57   17.66   0
  -6 -22  -5   18.89   12.28   0
   6 -22  -5   11.29   12.45   0
   1 -23   5   11.94   12.22   0
  -1 -23   5    9.31   12.13   0
  -2 -23   5   -2.50   12.31   0
   2 -23  -5    5.02   12.38   0
   2 -23   5   20.16   12.18   0
  -2 -23  -5    6.64   12.66   0
   3 -23   5   24.54   12.89   0
  -3 -23  -5   25.98   11.87   0
   3 -23  -5   12.11   12.49   0
  -3 -23   5   24.49   12.63   0
   4 -23   5   29.07   13.82   0
  -4 -23   5   35.32   12.65   0
   4 -23  -5   24.36   12.58   0
  -4 -23  -5   11.80   12.47   0
   0   0  -6 1347.63   32.55   0
  -1   0   6  201.93   21.09   0
   1   0  -6  211.06   20.89   0
  -2   0   6  237.30   21.51   0
   2   0  -6  244.67   21.33   0
  -3   0   6 2269.98   33.56   0
   3   0  -6 2431.66   34.15   0
   4   0  -6  350.25   18.12   0
  -4   0   6  351.71   18.31   0
   5   0  -6   69.29   14.82   0
  -5   0   6   64.58   14.66   0
  -6   0   6 2810.31   32.42   0
   6   0  -6 2870.27   32.78   0
  -7   0   6   20.72   14.52   0
   7   0  -6   29.34   14.21   0
  -8   0   6    2.51   12.84   0
   8   0  -6    0.90   12.50   0
  -9   0   6    8.76   11.54   0
  -9   0  -6    7.32   11.13   0
   9   0  -6   12.81   12.08   0
  10   0  -6   -3.43   11.20   0
 -10   0   6   -3.53   16.68   0
 -10   0  -6   21.46   11.87   0
  11   0  -6   77.05   13.09   0
 -11   0  -6   78.41   12.78   0
 -11   0   6   91.03   13.23   0
 -12   0  -6   68.62   11.59   0
 -12   0   6   60.81   13.06   0
 -13   0   6  320.79   15.74   0
 -13   0  -6  322.13   15.14   0
 -14   0   6   -8.28   16.32   0
 -14   0  -6   12.29   11.37   0
 -15   0  -6   -0.26   10.91   0
 -15   0   6    2.56   11.98   0
 -16   0   6    9.06   11.87   0
 -16   0  -6   -0.13   12.11   0
 -17   0   6    4.86   11.97   0
 -17   0  -6    2.86   12.00   0
  -1  -1   6  350.97   21.93   0
  -1   1  -6  405.34   27.13   0
   1  -1  -6  399.58   23.56   0
   1   1  -6  418.25   22.61   0
   2   1  -6  423.88   26.03   0
   2  -1  -6  455.61   22.55   0
  -2   1   6  402.32   22.97   0
  -2  -1   6  431.46   20.88   0
   3  -1  -6   15.15   16.21   0
  -3   1   6    9.88   16.55   0
   3   1  -6   11.97   21.22   0
  -3  -1   6   29.69   21.66   0
   4  -1  -6 1620.70   27.90   0
  -4  -1   6 1610.11   26.84   0
   4   1  -6 1597.00   26.70   0
  -4   1   6 1568.33   28.24   0
   5   1  -6  183.65   15.50   0
   5  -1  -6  194.52   15.50   0
  -5  -1   6  167.43   15.54   0
  -5   1   6  183.60   16.30   0
   6   1  -6  525.42   18.87   0
  -6   1   6  552.49   20.51   0
  -6  -1   6  553.03   19.53   0
   6  -1  -6  574.36   19.49   0
   7   1  -6   25.60   14.33   0
   7  -1  -6   43.89   13.82   0
  -7  -1   6   45.85   14.09   0
  -7   1   6   43.87   14.83   0
  -8  -1   6    1.09   12.75   0
  -8   1   6    8.63   12.08   0
   8  -1  -6    4.49   11.87   0
   8   1  -6   13.45   12.21   0
  -9  -1   6   20.25   11.67   0
  -9   1  -6   11.91   12.14   0
   9   1  -6    0.13   11.43   0
  -9   1   6   15.69   11.83   0
  -9  -1  -6   24.92   12.36   0
   9  -1  -6   31.46   11.40   0
 -10  -1   6   28.55   11.93   0
 -10   1  -6   18.38   12.17   0
  10   1  -6   22.79   12.53   0
  10  -1  -6   19.41   12.60   0
 -10  -1  -6   28.95   12.00   0
 -10   1   6   25.89   12.56   0
  11  -1  -6   72.51   12.76   0
 -11  -1   6   51.03   12.15   0
 -11  -1  -6   57.43   12.52   0
 -11   1   6   58.60   13.05   0
 -11   1  -6   55.53   16.47   0
  11   1  -6   56.52   11.83   0
 -12   1  -6    3.53   11.63   0
 -12  -1  -6   23.44   12.18   0
 -12   1   6    9.93   12.32   0
 -12  -1   6   19.73   11.98   0
  12  -1  -6   21.84   11.73   0
 -13  -1   6   28.52   11.96   0
 -13   1  -6   18.98   17.16   0
 -13  -1  -6   22.33   10.45   0
 -13   1   6   25.70   12.13   0
 -14   1  -6    2.24   15.80   0
 -14   1   6   10.25   11.56   0
 -14  -1  -6   18.47   11.01   0
 -14  -1   6  -13.89   11.63   0
 -15  -1   6   10.72   10.89   0
 -15   1  -6    8.58   11.07   0
 -15   1   6   19.84   11.83   0
 -15  -1  -6    6.64   10.50   0
 -16  -1   6   -2.67   11.72   0
 -16   1  -6    8.48   11.68   0
 -16  -1  -6    5.99   11.54   0
 -16   1   6    2.61   11.59   0
 -17  -1   6    0.10   17.15   0
 -17   1  -6   -0.17   12.10   0
 -17   1   6    6.14   13.13   0
 -17  -1  -6    5.23   12.24   0
   0  -2   6 4396.82   53.15   0
   0   2  -6 4639.05   53.61   0
   1  -2   6  339.39   25.27   0
  -1   2  -6  339.72   24.89   0
   1   2  -6  354.28   21.13   0
  -1  -2   6  342.76   20.88   0
  -2  -2   6  575.19   26.04   0
   2  -2  -6  567.03   32.20   0
  -2   2  -6  586.10   27.28   0
   2   2  -6  577.74   20.70   0
  -3   2   6  943.26   26.27   0
   3   2  -6  992.22   23.24   0
   3  -2  -6  969.87   26.11   0
  -3  -2   6  994.48   23.61   0
   4   2  -6   30.59   19.96   0
  -4  -2   6   31.32   14.37   0
   4  -2  -6   30.69   14.97   0
  -4   2   6   34.03   15.34   0
   5   2  -6  326.80   16.71   0
  -5   2   6  301.31   17.33   0
   5  -2  -6  338.09   18.10   0
  -5  -2   6  312.90   17.51   0
  -6   2   6  119.61   16.70   0
  -6  -2   6  140.40   15.60   0
   6  -2  -6  120.88   16.10   0
   6   2  -6  124.96   15.32   0
   7   2  -6  222.77   15.08   0
  -7   2   6   60.59   15.24   0
   7  -2  -6  240.42   16.18   0
  -7  -2   6  255.28   21.55   0
   8  -2  -6  812.71   19.37   0
   8   2  -6  704.51   17.54   0
  -8  -2   6  789.38   22.26   0
  -8   2  -6  749.74   20.56   0
  -8   2   6  752.01   19.41   0
  -9  -2   6  186.08   12.98   0
   9  -2  -6  182.70   13.99   0
  -9   2   6  145.29   14.71   0
   9   2  -6  178.24   12.96   0
  -9   2  -6  168.36   14.04   0
 -10   2  -6   62.14   12.35   0
 -10  -2   6   60.83   11.66   0
  10   2  -6   72.16   11.98   0
  10  -2  -6   85.14   17.37   0
 -10  -2  -6   53.31   11.45   0
 -10   2   6   84.06   13.20   0
  11  -2  -6  340.95   15.36   0
 -11  -2   6  318.55   14.29   0
 -11   2  -6  338.04   15.38   0
  11   2  -6  335.67   14.03   0
 -11   2   6  331.26   15.52   0
 -11  -2  -6  309.16   14.28   0
 -12  -2   6   29.92   12.49   0
  12  -2  -6   25.09   12.17   0
 -12   2  -6   30.27   11.78   0
 -12   2   6   29.28   12.59   0
 -12  -2  -6   16.93   11.45   0
 -13   2  -6   94.30   12.69   0
 -13  -2   6  101.40   12.60   0
 -13  -2  -6  101.67   13.35   0
 -13   2   6  107.42   13.57   0
 -14   2   6   -6.89   11.94   0
 -14  -2  -6   -4.44   11.30   0
 -14   2  -6   -0.11   11.86   0
 -14  -2   6   -2.70   11.45   0
 -15  -2   6   36.37   12.13   0
 -15   2   6   24.74   12.43   0
 -15  -2  -6    8.00   11.87   0
 -15   2  -6   33.91   12.51   0
 -16   2  -6   -2.75   12.03   0
 -16  -2   6    1.31   11.54   0
 -16   2   6   -0.72   12.33   0
 -16  -2  -6   -7.14   10.98   0
 -17  -2   6    5.74   12.06   0
 -17   2   6   -2.53   17.70   0
 -17   2  -6    5.43   12.86   0
 -17  -2  -6    5.62   11.85   0
  -1   3  -6  344.16   22.84   0
  -1  -3   6  373.78   20.90   0
   1  -3   6  363.42   23.73   0
   1   3  -6  302.67   19.98   0
   2   3  -6   43.08   14.82   0
  -2   3  -6   39.39   17.60   0
   2  -3   6   36.26   18.53   0
  -2  -3   6   49.73   14.82   0
   2  -3  -6   54.01   18.67   0
   3  -3  -6    9.58   15.49   0
   3   3  -6    7.81   14.48   0
  -3  -3   6    8.53   14.78   0
  -3   3  -6   15.36   16.88   0
  -4  -3   6   19.93   14.51   0
   4  -3  -6   16.88   20.53   0
   4   3  -6   -0.38   13.74   0
  -4   3   6   22.74   16.30   0
   5   3  -6  167.12   15.93   0
  -5   3   6  165.66   17.03   0
   5  -3  -6  175.18   17.06   0
  -5  -3   6  174.19   15.47   0
  -6   3   6  193.07   17.35   0
   6   3  -6  186.93   15.47   0
  -6  -3   6  202.41   17.12   0
   6  -3  -6  229.48   22.74   0
  -7   3   6   23.46   13.39   0
   7   3  -6   28.98   13.47   0
   7  -3  -6   14.75   13.16   0
  -7  -3   6   31.43   13.72   0
  -8  -3   6   25.06   12.19   0
   8  -3  -6   26.14   12.71   0
   8   3  -6   46.03   12.44   0
  -8   3   6   25.14   12.78   0
  -8   3  -6   28.02   12.91   0
   9  -3  -6    6.31   11.89   0
  -9  -3   6    9.45   11.14   0
  -9   3   6   16.73   13.04   0
   9   3  -6   -2.96   11.19   0
  -9   3  -6    6.46   12.59   0
 -10  -3   6   21.33   11.49   0
 -10  -3  -6    3.20   11.27   0
 -10   3  -6    5.66   11.69   0
  10   3  -6   -1.83   11.05   0
 -10   3   6   11.98   13.04   0
  10  -3  -6    1.92   12.19   0
  11  -3  -6    0.95   11.37   0
 -11   3   6    5.94   12.68   0
 -11  -3   6   18.18   10.91   0
 -11   3  -6    2.93   12.47   0
 -11  -3  -6   10.31   10.99   0
 -12   3   6   63.39   13.02   0
 -12  -3  -6   55.31   12.11   0
 -12  -3   6   70.50   12.05   0
 -12   3  -6   35.55   12.61   0
  12  -3  -6   59.23   12.21   0
 -13  -3   6   -7.22   11.31   0
 -13   3   6    9.07   10.87   0
 -13  -3  -6   14.90   10.23   0
 -13   3  -6    3.84   11.89   0
 -14   3   6    6.58   11.63   0
 -14  -3   6    2.83   16.01   0
 -14   3  -6    6.54   16.09   0
 -14  -3  -6    3.58   11.36   0
 -15  -3  -6   10.50   11.44   0
 -15   3  -6    3.86   16.92   0
 -15   3   6    0.29   11.62   0
 -15  -3   6    2.35   11.96   0
 -16   3   6   -0.37   12.19   0
 -16  -3   6  -17.06   11.91   0
 -16   3  -6    2.98   12.20   0
 -16  -3  -6    6.34   10.98   0
 -17  -3  -6   -0.88   12.86   0
 -17  -3   6   18.54   12.62   0
 -17   3  -6    7.99   13.01   0
 -17   3   6   12.01   18.46   0
   0   4  -6 8719.46   64.99   0
   0  -4   6 8689.82   64.88   0
   1  -4   6  135.55   18.50   0
  -1  -4   6  136.08   17.08   0
  -1   4  -6  143.50   17.76   0
   1   4  -6  129.70   22.74   0
  -2   4  -6  144.24   19.08   0
   2  -4   6  134.51   19.97   0
  -2  -4   6  153.43   16.23   0
   2   4  -6  156.10   16.12   0
  -3  -4   6   12.03   20.25   0
   3  -4  -6    4.49   15.93   0
  -3   4  -6   -1.52   15.84   0
   3   4  -6  -18.74   13.79   0
  -4   4  -6   29.54   15.97   0
  -4  -4   6   52.76   14.22   0
   4   4  -6   28.82   13.74   0
   4  -4  -6   25.87   15.65   0
   5   4  -6   91.05   15.14   0
  -5   4   6   93.29   17.65   0
  -5  -4   6   70.45   15.41   0
   5  -4  -6  101.93   16.76   0
  -6   4   6  867.31   24.55   0
  -6  -4   6  889.30   19.72   0
   6  -4  -6  933.04   23.70   0
   6   4  -6  889.25   19.44   0
  -7   4  -6   18.54   13.37   0
  -7   4   6   22.64   14.15   0
   7   4  -6   43.46   18.16   0
  -7  -4   6   42.84   18.92   0
   7  -4  -6   19.24   13.26   0
  -8   4  -6  143.44   16.05   0
   8   4  -6  144.62   12.84   0
  -8  -4   6  146.40   13.43   0
  -8   4   6  144.67   19.54   0
   8  -4  -6  145.75   13.68   0
  -9  -4   6  181.59   12.71   0
   9  -4  -6  188.27   14.67   0
  -9   4  -6  180.32   19.41   0
   9   4  -6  196.32   13.43   0
  -9   4   6  196.83   19.33   0
 -10  -4  -6  113.81   11.92   0
 -10  -4   6   99.95   12.88   0
  10  -4  -6  125.35   12.45   0
 -10   4   6  103.74   14.54   0
 -10   4  -6  115.03   13.23   0
 -11  -4  -6   92.71   16.08   0
 -11   4   6   67.12   13.17   0
  11  -4  -6  111.09   17.18   0
 -11   4  -6   47.05   13.25   0
 -11  -4   6   77.25   12.04   0
 -12   4  -6   62.96   13.44   0
 -12   4   6   91.55   17.78   0
  12  -4  -6   71.68   13.29   0
 -12  -4  -6   68.06   11.54   0
 -12  -4   6   80.17   12.23   0
 -13  -4  -6  164.91   13.14   0
 -13  -4   6  172.13   12.93   0
 -13   4   6  143.98   13.97   0
 -13   4  -6  180.81   18.72   0
 -14   4  -6    1.78   12.68   0
 -14  -4  -6   -6.25   15.55   0
 -14  -4   6    3.98   15.86   0
 -14   4   6   -3.71   11.86   0
 -15   4  -6   10.26   16.98   0
 -15  -4   6   -1.90   11.37   0
 -15   4   6    9.08   12.54   0
 -15  -4  -6    7.46   11.16   0
 -16   4   6   -5.17   12.13   0
 -16   4  -6    8.86   17.28   0
 -16  -4   6    5.46   11.92   0
 -16  -4  -6    6.08   11.79   0
 -17  -4   6   17.41   11.96   0
 -17  -4  -6   17.83   11.90   0
 -17   4   6   12.11   12.79   0
 -17   4  -6   12.46   17.97   0
   1  -5   6   32.34   16.56   0
   1   5  -6   20.87   13.98   0
  -1  -5   6   34.14   15.33   0
  -1   5  -6   25.73   15.21   0
   2   5  -6 1834.02   27.77   0
   2  -5   6 2296.51   41.89   0
  -2   5  -6 2064.87   37.99   0
  -2  -5   6 2253.96   30.05   0
   3   5  -6  137.55   14.73   0
  -3   5  -6  138.74   17.92   0
  -3  -5   6  122.49   15.22   0
   3  -5   6  122.26   18.25   0
   3  -5  -6  126.19   18.35   0
  -4   5  -6   17.75   14.45   0
   4  -5  -6    3.72   15.06   0
   4   5  -6   24.43   14.05   0
  -4  -5   6   17.77   14.35   0
  -5   5  -6    8.31   23.44   0
   5   5  -6   -0.95   14.32   0
  -5  -5   6    9.00   15.20   0
   5  -5  -6    8.51   15.10   0
   6   5  -6  416.17   16.29   0
   6  -5  -6  481.48   19.21   0
  -6   5  -6  322.69   26.14   0
  -6  -5   6  453.11   16.71   0
  -7  -5   6   13.87   12.54   0
   7   5  -6   12.76   12.38   0
  -7   5   6   19.42   19.44   0
   7  -5  -6   23.83   12.82   0
  -7   5  -6   15.30   18.72   0
  -8  -5   6   -3.04   11.62   0
   8  -5  -6    2.18   12.25   0
  -8   5  -6    1.56   12.19   0
   8   5  -6   -3.00   11.58   0
  -8   5   6   -5.20   12.71   0
   9   5  -6   47.04   11.99   0
   9  -5  -6   40.60   12.24   0
  -9   5   6   42.22   13.27   0
  -9  -5   6   52.77   12.55   0
  -9   5  -6   33.53   13.06   0
  10  -5  -6    6.77   11.70   0
 -10  -5   6   -2.52   11.84   0
 -10   5  -6   -0.44   12.43   0
 -10  -5  -6   20.17   15.86   0
 -10   5   6   -5.62   18.10   0
  11  -5  -6   34.00   12.13   0
 -11  -5   6   16.14   11.41   0
 -11  -5  -6   47.20   11.25   0
 -11   5  -6   38.76   13.11   0
 -11   5   6   28.54   12.83   0
 -12   5  -6   33.08   12.41   0
 -12   5   6   41.13   12.76   0
  12  -5  -6   35.93   12.52   0
 -12  -5   6   37.60   11.65   0
 -12  -5  -6   41.47   12.84   0
 -13   5   6   11.54   12.39   0
 -13   5  -6   10.45   12.50   0
 -13  -5   6   -0.47   10.74   0
 -13  -5  -6    7.21   11.16   0
 -14   5  -6   16.79   13.12   0
 -14   5   6   24.40   12.60   0
 -14  -5   6   30.86   11.73   0
 -14  -5  -6   31.83   11.53   0
 -15  -5   6   10.97   16.05   0
 -15   5   6    7.41   12.33   0
 -15  -5  -6    2.86   11.61   0
 -15   5  -6   -0.85   11.80   0
 -16  -5  -6    8.82   12.15   0
 -16   5   6   -4.36   12.73   0
 -16  -5   6    6.85   12.06   0
 -16   5  -6   -2.67   12.29   0
   0  -6   6   54.38   14.21   0
   0   6  -6   43.08   13.90   0
  -1  -6   6  147.00   15.48   0
  -1   6  -6  134.92   16.45   0
   1  -6   6  126.18   16.21   0
   1   6  -6  145.53   15.01   0
  -2   6  -6   60.07   14.95   0
   2  -6   6   50.39   15.73   0
  -2  -6   6   72.83   14.12   0
   2   6  -6   55.34   13.88   0
  -3   6  -6    2.36   13.91   0
   3   6  -6    8.21   14.00   0
  -3  -6   6    6.51   13.71   0
   3  -6   6    8.74   15.31   0
  -4   6  -6  533.06   32.16   0
  -4  -6   6  538.98   18.40   0
   4   6  -6  523.87   18.64   0
   4  -6  -6  538.66   21.95   0
   5  -6  -6    8.91   14.90   0
  -5  -6   6   28.32   14.33   0
   5   6  -6   23.02   14.03   0
  -6  -6   6    9.69   12.48   0
   6   6  -6    6.09   11.75   0
   6  -6  -6   10.74   18.74   0
   7  -6  -6  179.50   14.84   0
  -7  -6   6  116.29   12.96   0
   7   6  -6  156.15   12.44   0
   8   6  -6    4.04   11.41   0
  -8  -6   6   11.81   11.42   0
   8  -6  -6    6.81   11.90   0
  -9   6  -6  324.38   36.87   0
  -9   6  -6   48.81   16.87   0
  -9   6   6  277.46   17.14   0
   9  -6  -6  333.04   16.06   0
  -9  -6   6  334.07   14.05   0
 -10   6   6   33.41   13.36   0
 -10  -6   6   26.88   12.73   0
 -10  -6  -6   34.70   12.67   0
 -10   6  -6   22.58   19.48   0
  10  -6  -6   33.74   12.02   0
  11  -6  -6    7.25   11.07   0
 -11  -6  -6    7.10   10.71   0
 -11   6   6   11.64   13.04   0
 -11  -6   6    4.57   11.48   0
 -11   6  -6    0.52   13.05   0
 -12   6  -6    0.77   12.37   0
 -12  -6  -6   11.08   10.70   0
 -12  -6   6   23.62   11.81   0
 -12   6   6    7.68   13.08   0
  12  -6  -6   21.45   11.11   0
 -13  -6   6   77.15   11.78   0
 -13   6   6   82.19   13.06   0
 -13   6  -6   51.73   14.85   0
 -13  -6  -6   85.48   12.00   0
 -14   6  -6    0.41   17.31   0
 -14   6   6   -1.17   13.44   0
 -14  -6  -6    5.24   10.66   0
 -14  -6   6    2.19   11.19   0
 -15   6   6   35.11   18.06   0
 -15   6  -6   18.03   18.37   0
 -15  -6  -6   30.89   11.52   0
 -15  -6   6   10.60   11.66   0
 -16  -6  -6   -6.95   12.16   0
 -16   6   6    3.49   12.39   0
 -16  -6   6    4.75   12.31   0
 -16   6  -6    5.71   18.17   0
  -1   7  -6  161.03   15.72   0
   1   7  -6  146.30   15.28   0
   1  -7   6  158.21   16.59   0
  -1  -7   6  165.60   15.47   0
  -2   7  -6  188.12   17.37   0
   2   7  -6  212.37   16.29   0
  -2  -7   6  238.38   16.19   0
   2  -7   6  227.25   18.01   0
  -3  -7   6  102.78   21.42   0
   3   7  -6  136.60   14.82   0
   3  -7   6  127.99   22.55   0
  -3   7  -6  122.11   20.61   0
  -4  -7   6   37.93   14.15   0
  -4   7  -6   42.21   22.03   0
   4  -7  -6   34.74   17.56   0
   4  -7   6   25.05   18.51   0
   4   7  -6   32.28   14.88   0
   5  -7  -6   13.68   14.07   0
  -5  -7   6   28.01   13.14   0
   5   7  -6   23.50   13.33   0
   6  -7  -6  328.62   17.22   0
   6   7  -6  317.92   13.84   0
  -6  -7   6  330.43   18.39   0
   7   7  -6   -9.50   11.69   0
   7  -7  -6    7.21   12.53   0
  -7  -7   6   18.73   11.65   0
   8  -7  -6   23.04   12.22   0
  -8  -7   6   13.76   12.32   0
   9  -7  -6   -5.13   11.23   0
  -9  -7   6    0.12   11.65   0
 -10  -7  -6   97.90   12.29   0
  10  -7  -6   97.03   14.33   0
 -10  -7   6   89.92   12.15   0
 -11  -7  -6   27.25   11.10   0
  11  -7  -6   24.68   12.23   0
 -11  -7   6   20.39   11.46   0
  12  -7  -6    2.15   11.73   0
 -12  -7   6   -0.41   11.80   0
 -13  -7  -6    4.71   10.95   0
 -13  -7   6   10.40   11.99   0
 -14  -7   6   23.92   11.67   0
 -14  -7  -6    6.50   11.60   0
 -15  -7  -6    1.85   12.20   0
 -15  -7   6   -7.57   11.66   0
 -16  -7   6  -11.37   11.68   0
 -16  -7  -6   -3.08   11.00   0
   0  -8   6  236.22   16.65   0
   0   8  -6  237.41   15.98   0
   1  -8   6   59.95   15.11   0
   1   8  -6   48.67   15.11   0
  -1   8  -6   55.54   14.59   0
  -1  -8   6   59.30   15.80   0
  -2  -8   6   24.92   14.89   0
   2  -8   6   28.04   15.18   0
   2   8  -6   23.96   14.44   0
  -2   8  -6   14.08   14.10   0
  -3  -8   6   42.64   13.85   0
   3  -8   6   12.00   14.68   0
   3   8  -6   26.13   13.69   0
   4  -8   6  595.98   27.74   0
  -4  -8   6  609.65   17.31   0
   4   8  -6  587.88   17.22   0
   5   8  -6  199.56   13.45   0
   5  -8  -6  205.28   17.33   0
  -5  -8   6  222.20   13.58   0
  -6  -8   6   81.02   11.94   0
   6  -8  -6   80.43   13.97   0
  -7  -8   6  192.24   12.32   0
   7  -8  -6  173.74   14.53   0
   8  -8  -6   32.25   12.80   0
  -8  -8   6   31.14   12.17   0
   9  -8  -6   95.18   12.96   0
  -9  -8   6  116.75   13.19   0
 -10  -8   6    7.64   11.21   0
 -10  -8  -6    8.82   11.82   0
  10  -8  -6    7.26   11.94   0
  11  -8  -6   15.26   17.43   0
 -11  -8  -6   11.01   11.38   0
 -11  -8   6   31.06   11.39   0
 -12  -8  -6   11.49   11.44   0
 -12  -8   6    5.92   11.60   0
  12  -8  -6    9.20   12.11   0
 -13  -8  -6   53.62   11.12   0
 -13  -8   6   53.30   11.79   0
 -14  -8  -6    9.39   11.14   0
 -14  -8   6   -8.29   11.08   0
 -15  -8  -6    5.69   11.53   0
 -15  -8   6   37.13   16.84   0
 -16  -8  -6   -0.38   11.27   0
 -16  -8   6   -2.87   12.27   0
  -1  -9   6  134.90   16.21   0
   1  -9   6  131.11   16.48   0
   1   9  -6  130.14   14.91   0
   2   9  -6   51.78   13.99   0
  -2  -9   6   64.63   20.50   0
   2  -9   6   69.91   19.95   0
   3  -9   6   34.80   14.64   0
  -3  -9   6   36.25   13.66   0
   3   9  -6   51.12   14.04   0
   4  -9   6  448.76   23.33   0
  -4  -9   6  456.32   16.46   0
  -5  -9   6  101.30   11.91   0
   5  -9  -6   66.90   14.53   0
  -6  -9   6  158.95   12.44   0
   6  -9  -6  156.51   15.03   0
  -7  -9   6   -2.42   11.57   0
   7  -9  -6    4.10   11.99   0
  -8  -9   6  108.91   12.71   0
   8  -9  -6  111.74   13.91   0
   9  -9  -6    1.46   12.64   0
  -9  -9   6   10.16   11.85   0
 -10  -9  -6   88.57   12.62   0
  10  -9  -6  116.80   14.76   0
 -10  -9   6  108.90   12.62   0
 -11  -9   6  -13.10   11.23   0
 -11  -9  -6    4.57   11.50   0
  11  -9  -6   -1.56   11.60   0
 -12  -9   6    7.78   11.57   0
 -12  -9  -6   11.27   10.99   0
  12  -9  -6    0.62   11.23   0
 -13  -9  -6    1.37   11.24   0
 -14  -9  -6   31.68   11.73   0
 -14  -9   6   15.77   11.49   0
 -15  -9  -6   -4.34   12.21   0
 -15  -9   6    3.39   11.84   0
   0 -10   6  511.92   22.68   0
   1 -10   6   64.33   13.79   0
  -1 -10   6   76.61   19.78   0
  -2 -10   6  439.99   16.72   0
   2 -10   6  431.81   18.62   0
  -3 -10   6  123.35   13.58   0
   3 -10   6   57.91   13.76   0
  -4 -10   6  229.13   13.50   0
   4 -10   6  225.19   22.87   0
  -5 -10   6   77.65   12.44   0
   5 -10   6   54.27   21.20   0
  -6 -10   6   -4.60   11.66   0
   6 -10  -6   -2.34   12.63   0
   7 -10  -6  184.86   15.07   0
  -7 -10   6  164.48   13.02   0
   8 -10  -6   20.11   17.55   0
  -8 -10   6   21.70   11.57   0
   9 -10  -6   47.35   13.52   0
  -9 -10   6   71.07   11.57   0
 -10 -10  -6   23.90   11.78   0
  10 -10  -6   15.23   12.59   0
 -10 -10   6    1.84   11.75   0
 -11 -10  -6  -11.07   11.92   0
  11 -10  -6   14.97   11.92   0
 -11 -10   6   16.36   11.60   0
 -12 -10  -6   -0.77   11.88   0
 -12 -10   6    7.68   11.75   0
  12 -10  -6   14.86   12.76   0
 -13 -10   6   14.56   11.03   0
 -13 -10  -6    7.84   11.46   0
 -14 -10  -6   -3.28   10.89   0
 -14 -10   6    0.99   12.19   0
 -15 -10  -6   -2.33   12.09   0
 -15 -10   6   -6.72   10.89   0
   1 -11   6  297.90   15.52   0
  -1 -11   6  292.80   15.25   0
  -2 -11   6    4.88   12.42   0
   2 -11   6   -4.05   11.95   0
  -3 -11   6    5.78   12.17   0
   3 -11   6   11.70   12.59   0
   4 -11   6   92.22   15.25   0
  -4 -11   6   60.85   12.52   0
  -5 -11   6   94.37   12.61   0
   5 -11   6   75.70   15.20   0
   6 -11  -6   52.58   13.12   0
  -6 -11   6   48.58   11.36   0
  -7 -11   6  124.38   12.54   0
   7 -11  -6  125.43   13.84   0
  -8 -11   6   36.42   11.24   0
   8 -11  -6   34.39   17.61   0
  -9 -11  -6   11.27   11.40   0
  -9 -11   6   -4.33   11.63   0
   9 -11  -6    5.63   12.76   0
  10 -11  -6   -1.37   16.56   0
 -10 -11   6  -11.90   11.97   0
 -10 -11  -6   -2.35   12.31   0
  11 -11  -6   20.43   12.72   0
 -11 -11   6   11.70   11.31   0
 -11 -11  -6   26.58   11.63   0
 -12 -11   6   10.35   10.89   0
  12 -11  -6    0.61   11.82   0
 -13 -11  -6   10.39   11.48   0
 -13 -11   6   19.15   11.38   0
 -14 -11   6   21.06   16.55   0
 -14 -11  -6   44.93   12.63   0
 -15 -11   6  -12.74   11.99   0
 -15 -11  -6    9.89   11.65   0
   0 -12   6   -4.85   11.75   0
  -1 -12   6    1.50   12.28   0
   1 -12   6    8.65   12.24   0
  -2 -12   6    4.25   11.39   0
   2 -12   6   -2.02   16.92   0
  -3 -12   6   11.62   11.78   0
   3 -12   6   21.16   12.74   0
   4 -12   6    1.68   12.04   0
  -4 -12   6    3.52   11.80   0
  -5 -12   6   37.86   12.43   0
   5 -12   6   35.26   13.57   0
  -6 -12   6   23.96   11.50   0
   6 -12  -6   20.57   13.37   0
   7 -12  -6   31.91   12.77   0
  -7 -12   6   29.28   11.29   0
   8 -12  -6    8.63   12.57   0
  -8 -12   6   11.50   15.88   0
  -9 -12   6  208.37   12.85   0
   9 -12  -6  181.83   15.47   0
  -9 -12  -6  224.21   13.23   0
 -10 -12  -6    9.80   11.28   0
 -10 -12   6   25.45   11.25   0
  10 -12  -6   14.73   12.67   0
  11 -12  -6   82.65   15.57   0
 -11 -12   6   64.57   12.38   0
 -12 -12  -6   10.91   11.26   0
 -12 -12   6   21.49   11.10   0
 -13 -12  -6   20.13   12.48   0
 -14 -12   6   -5.55   12.22   0
 -14 -12  -6    4.36   11.78   0
   1 -13   6   66.43   16.81   0
  -1 -13   6   89.53   12.56   0
   2 -13   6  143.30   13.73   0
  -2 -13   6  112.17   13.00   0
   3 -13   6  735.69   20.37   0
  -3 -13   6  757.33   17.65   0
  -4 -13   6   79.75   12.69   0
   4 -13   6   72.52   12.80   0
  -5 -13   6  175.30   13.55   0
   5 -13   6  147.14   16.28   0
   6 -13  -6  131.45   20.01   0
   6 -13   6   69.45   24.71   0
  -6 -13   6  120.95   12.91   0
  -7 -13   6   72.47   11.84   0
   7 -13  -6   54.15   18.91   0
  -8 -13   6    7.87   11.59   0
   8 -13  -6    7.26   12.60   0
   9 -13  -6   74.48   13.59   0
  -9 -13   6   76.12   11.53   0
  10 -13  -6   11.01   12.23   0
 -11 -13  -6   12.83   11.09   0
  11 -13  -6    3.84   12.32   0
 -11 -13   6    1.83   10.74   0
 -12 -13  -6    4.97   11.32   0
 -12 -13   6    9.36   11.48   0
 -13 -13  -6   -7.53   12.24   0
 -14 -13  -6   11.09   12.27   0
 -14 -13   6    5.74   11.99   0
   0 -14   6  160.62   13.84   0
  -1 -14   6    9.05   11.66   0
   1 -14   6   13.37   12.67   0
  -2 -14   6    6.96   11.30   0
   2 -14   6   15.31   12.14   0
  -3 -14   6   68.81   13.05   0
   3 -14   6   67.88   12.72   0
  -4 -14   6   93.08   12.72   0
   4 -14   6   99.69   14.63   0
  -5 -14   6  -18.57   12.44   0
   5 -14   6   -2.05   12.88   0
   6 -14   6    4.44   12.98   0
  -6 -14   6  -18.98   12.02   0
  -7 -14   6   23.16   11.47   0
   7 -14  -6   26.21   13.06   0
  -8 -14   6   11.95   11.21   0
   8 -14  -6   16.71   12.47   0
  -8 -14  -6   21.48   11.45   0
  -9 -14   6   89.39   11.39   0
   9 -14  -6   69.60   14.02   0
  -9 -14  -6   67.42   11.72   0
 -10 -14   6   -7.10   11.16   0
 -10 -14  -6   -1.78   10.82   0
  10 -14  -6    5.45   11.98   0
 -11 -14  -6   21.96   12.48   0
  11 -14  -6    4.72   13.20   0
 -11 -14   6   23.68   12.05   0
 -12 -14  -6  -10.94   11.23   0
 -13 -14  -6   14.02   11.77   0
  -1 -15   6  269.51   13.32   0
   1 -15   6  263.31   14.98   0
  -2 -15   6   59.88   11.96   0
   2 -15   6   92.26   13.18   0
  -3 -15   6   92.35   13.19   0
   3 -15   6   79.14   13.02   0
   4 -15   6   53.67   18.18   0
  -4 -15   6   47.98   12.52   0
   5 -15   6   67.98   14.12   0
  -5 -15   6   35.42   12.40   0
   6 -15   6   75.53   19.46   0
  -6 -15   6   88.59   12.18   0
  -7 -15   6   37.19   11.52   0
   7 -15  -6   31.82   12.96   0
  -8 -15   6   49.15   11.60   0
  -8 -15  -6   69.63   11.33   0
   8 -15  -6   39.22   12.91   0
   9 -15  -6   21.19   13.87   0
  -9 -15   6   29.89   11.14   0
  -9 -15  -6   38.25   11.13   0
 -10 -15  -6   89.21   11.99   0
  10 -15  -6   65.58   15.58   0
 -11 -15  -6   17.21   11.30   0
 -11 -15   6    9.59   11.11   0
 -12 -15  -6   19.80   11.61   0
 -13 -15  -6    4.36   11.85   0
   0 -16   6   49.78   12.48   0
  -1 -16   6  120.78   13.66   0
   1 -16   6  146.40   17.63   0
   2 -16   6    9.89   12.47   0
  -2 -16   6    6.26   11.14   0
  -3 -16   6   28.29   11.96   0
   3 -16   6    5.66   17.74   0
  -4 -16   6    4.59   11.78   0
   4 -16   6   -0.73   12.63   0
   5 -16   6   84.24   14.05   0
  -5 -16   6   81.49   12.77   0
   6 -16   6    2.65   12.16   0
  -6 -16   6   -1.56   11.44   0
  -7 -16   6   10.60   11.39   0
  -7 -16  -6   -4.42   11.26   0
   7 -16  -6   11.28   12.48   0
   8 -16  -6   -1.26   12.15   0
  -9 -16   6   22.33   11.48   0
   9 -16  -6   24.24   12.12   0
  10 -16  -6    1.29   11.92   0
 -11 -16  -6   -2.35   11.29   0
 -11 -16   6   10.22   11.21   0
 -12 -16  -6   10.33   12.33   0
   1 -17   6   84.84   12.66   0
  -1 -17   6   51.88   12.44   0
   2 -17   6   18.25   11.49   0
  -2 -17   6   19.02   12.17   0
  -3 -17   6   81.62   11.56   0
   3 -17   6   54.70   13.36   0
  -4 -17   6   20.53   10.82   0
   4 -17   6   38.08   12.67   0
   5 -17   6   29.98   12.21   0
  -5 -17   6   33.58   12.11   0
  -6 -17   6    8.44   12.06   0
   6 -17   6    3.91   12.27   0
  -7 -17   6   -2.51   11.53   0
   7 -17  -6    6.87   13.01   0
  -8 -17   6   16.15   11.81   0
   8 -17  -6   20.74   17.74   0
  -8 -17  -6   11.14   11.44   0
  -9 -17  -6   -9.11   10.93   0
   9 -17  -6    3.06   11.90   0
  -9 -17   6    7.77   11.04   0
  10 -17  -6  108.00   24.47   0
 -10 -17  -6  108.23   12.41   0
  10 -17  -6  109.49   24.88   0
 -11 -17   6  -11.63   11.61   0
 -11 -17  -6    3.45   11.14   0
 -12 -17  -6    1.82   11.64   0
   0 -18   6   79.24   12.85   0
  -1 -18   6   26.68   16.30   0
   1 -18   6    9.20   10.55   0
   2 -18   6    6.88   12.40   0
  -2 -18   6    7.70   12.10   0
  -3 -18   6   97.84   12.30   0
   3 -18   6   90.85   13.91   0
   4 -18   6   10.23   11.70   0
  -4 -18   6    6.08   10.63   0
   5 -18   6   39.65   18.09   0
  -5 -18   6   50.81   11.92   0
  -6 -18  -6   37.33   11.64   0
   6 -18   6   37.44   13.64   0
  -6 -18   6   45.18   11.69   0
  -7 -18  -6   27.95   11.35   0
   7 -18  -6   19.27   12.64   0
  -8 -18   6    5.50   12.29   0
   8 -18  -6    9.06   12.76   0
   9 -18  -6    0.69   12.47   0
  -9 -18   6   -3.24   11.24   0
   9 -18  -6    3.52   17.41   0
 -10 -18  -6    0.44   16.04   0
 -10 -18   6   -3.90   11.62   0
 -11 -18  -6   -1.97   11.51   0
 -11 -18   6   13.15   11.42   0
  -1 -19   6   15.57   11.27   0
   1 -19   6   13.37   11.95   0
  -2 -19   6   -0.89   16.49   0
   2 -19   6    6.07   12.04   0
   3 -19   6  188.39   14.84   0
  -3 -19   6  184.75   13.18   0
  -4 -19   6   39.14   11.78   0
   4 -19   6   36.47   12.66   0
   5 -19   6  155.20   19.61   0
  -5 -19   6  123.29   12.80   0
  -5 -19  -6  126.62   12.31   0
  -6 -19  -6    4.55   11.02   0
   6 -19   6    4.09   12.03   0
  -7 -19   6   26.11   11.83   0
   7 -19  -6    8.17   12.84   0
   8 -19  -6    4.89   17.07   0
  -8 -19  -6   13.74   12.50   0
  -8 -19   6    4.89   12.29   0
   8 -19  -6    8.42   12.79   0
   9 -19  -6   -0.55   12.20   0
  -9 -19  -6    9.25   11.62   0
   9 -19  -6    3.14   12.53   0
 -10 -19   6   46.19   12.65   0
 -10 -19  -6   18.46   12.06   0
   0 -20   6   15.30   12.37   0
  -1 -20   6    5.36   11.72   0
   1 -20   6   -6.70   12.63   0
  -2 -20   6   59.08   12.46   0
   2 -20   6   59.44   11.82   0
  -3 -20   6  -10.16   11.84   0
   3 -20   6   -6.72   11.77   0
   4 -20   6    3.31   17.71   0
  -4 -20  -6    3.57   11.59   0
  -4 -20   6   -3.06   11.43   0
   5 -20   6   -3.00   17.33   0
  -5 -20  -6   -8.81   11.62   0
  -5 -20   6   25.12   10.69   0
  -6 -20   6    5.46   12.14   0
   6 -20   6    5.78   17.39   0
  -7 -20   6    1.79   11.73   0
  -7 -20  -6   16.14   11.65   0
   7 -20  -6   -1.29   13.25   0
   7 -20  -6    2.39   11.91   0
   8 -20  -6   -2.79   11.77   0
   8 -20  -6   -2.69   12.68   0
  -8 -20  -6   20.35   11.97   0
  -8 -20   6  -14.85   12.16   0
   9 -20  -6    6.85   18.46   0
   9 -20  -6    3.61   12.52   0
  -9 -20  -6    7.12   12.34   0
  -1 -21   6   47.59   13.42   0
  -1 -21  -6   56.26   11.79   0
   1 -21   6   48.40   11.89   0
  -2 -21   6   20.99   11.74   0
   2 -21   6   26.03   12.55   0
  -2 -21  -6   16.41   11.91   0
   3 -21   6  159.16   14.60   0
  -3 -21   6  142.36   13.25   0
  -4 -21  -6   12.08   11.70   0
  -4 -21   6   24.17   11.38   0
   4 -21  -6    6.48   11.89   0
   4 -21   6   15.75   12.30   0
   5 -21   6   61.67   13.79   0
   5 -21  -6   62.14   13.11   0
  -5 -21   6   56.83   12.82   0
  -6 -21   6   13.90   12.64   0
  -6 -21  -6   13.34   11.48   0
   6 -21  -6    7.68   11.59   0
   6 -21   6   12.94   18.20   0
   7 -21  -6   10.95   13.56   0
  -7 -21  -6   18.52   12.07   0
   7 -21  -6    8.63   18.22   0
  -7 -21   6   32.22   12.20   0
   0 -22   6    5.18   12.08   0
  -1 -22   6   10.13   12.36   0
   1 -22   6    3.02   11.82   0
   1 -22  -6   -8.24   11.75   0
  -1 -22  -6   -4.81   11.10   0
  -2 -22  -6   10.05   11.60   0
   2 -22   6   -3.45   12.64   0
   2 -22  -6   17.06   11.59   0
  -2 -22   6   11.31   11.08   0
  -3 -22  -6    4.56   10.93   0
   3 -22  -6   12.59   11.63   0
   3 -22   6    2.82   12.65   0
  -4 -22   6  -10.00   12.51   0
   4 -22   6   -0.59   12.77   0
   4 -22  -6    3.97   11.78   0
  -4 -22  -6  -10.55   11.84   0
  -5 -22  -6   12.31   12.00   0
   5 -22   6    7.45   13.41   0
   5 -22  -6    4.60   12.12   0
  -6 -22  -6   -1.40   12.06   0
   6 -22  -6    0.87   12.46   0
   6 -22   6    1.16   12.64   0
   1 -23  -6   66.44   12.91   0
  -1 -23   6  113.07   13.59   0
   1 -23   6   78.68   13.80   0
  -1 -23  -6  103.59   13.13   0
  -2 -23  -6    8.90   11.13   0
  -2 -23   6    1.08   12.02   0
   2 -23   6   12.56   12.44   0
   2 -23  -6   -1.20   16.83   0
  -3 -23  -6   -3.11   12.13   0
   3 -23   6    0.96   12.67   0
   3 -23  -6   14.05   12.39   0
  -3 -23   6   -3.20   12.08   0
   4 -23   6   -3.23   12.66   0
   4 -23  -6    6.16   12.44   0
  -4 -23  -6    5.97   16.80   0
  -4 -23   6   26.20   12.47   0
   1  -1  -7    3.63   18.67   0
  -1  -1   7    2.56   17.28   0
   1   1  -7   -6.55   16.39   0
  -1   1  -7   15.00   21.73   0
  -2   1   7   -5.12   17.52   0
   2  -1  -7   -1.69   16.90   0
   2   1  -7   -6.71   14.88   0
  -2  -1   7    8.32   14.96   0
  -3   1   7  102.65   17.92   0
  -3  -1   7  108.60   16.42   0
   3   1  -7  110.50   15.72   0
   3  -1  -7  117.60   17.90   0
  -4  -1   7    3.78   13.62   0
   4  -1  -7    4.13   14.33   0
   4   1  -7    6.08   13.82   0
  -4   1   7    7.19   14.52   0
  -5  -1   7   63.26   15.43   0
   5  -1  -7   48.13   15.44   0
  -5   1   7   56.34   14.68   0
   5   1  -7   60.43   14.72   0
  -6   1   7    6.50   15.34   0
   6   1  -7   -9.41   14.95   0
  -6  -1   7   20.95   14.91   0
   6  -1  -7   18.49   21.34   0
  -7  -1   7  238.92   16.12   0
   7   1  -7  232.75   15.76   0
   7  -1  -7  176.90   15.33   0
  -7   1   7  214.91   16.09   0
  -8  -1   7  161.94   14.22   0
  -8   1   7  169.00   14.31   0
   8  -1  -7  160.33   14.01   0
   8   1  -7  157.14   13.86   0
  -9  -1   7  157.68   13.06   0
  -9   1   7  159.50   13.49   0
   9   1  -7  152.00   12.67   0
   9  -1  -7  135.26   12.57   0
  10  -1  -7   77.80   12.93   0
 -10  -1   7   65.53   11.80   0
  10   1  -7   68.92   12.18   0
 -10   1   7   84.56   13.35   0
 -10  -1  -7   91.25   17.75   0
 -10   1  -7   73.79   12.91   0
 -11  -1  -7    9.79   11.89   0
 -11   1  -7   10.03   11.00   0
  11  -1  -7    2.62   11.07   0
  11   1  -7    3.45   11.72   0
 -11  -1   7   -9.23   11.13   0
 -11   1   7   12.49   12.53   0
 -12  -1   7   -1.05   12.08   0
 -12  -1  -7    4.57   11.43   0
 -12   1  -7   22.41   11.72   0
  12  -1  -7    7.02   11.79   0
  12   1  -7   23.84   11.60   0
 -12   1   7   21.61   12.23   0
 -13  -1   7   17.51   11.02   0
 -13   1   7    7.03   10.88   0
 -13   1  -7    9.63   12.01   0
 -13  -1  -7   17.06   12.02   0
 -14   1  -7   14.39   11.26   0
 -14  -1   7   -7.31   11.79   0
 -14   1   7   15.57   12.02   0
 -14  -1  -7   14.75   11.61   0
 -15   1   7   54.89   12.39   0
 -15   1  -7   26.30   12.95   0
 -15  -1   7   32.34   11.65   0
 -15  -1  -7   33.74   15.83   0
 -16  -1  -7   -4.55   11.70   0
 -16   1   7   12.24   11.94   0
 -16   1  -7    2.95   11.49   0
 -16  -1   7    7.55   16.62   0
 -17   1  -7    3.12   12.25   0
 -17   1   7   -2.95   12.43   0
 -17  -1   7   14.41   12.06   0
 -17  -1  -7    3.28   11.90   0
   0   2  -7  136.04   21.26   0
   0  -2   7  132.89   21.86   0
   1  -2   7 3887.30   49.42   0
   1   2  -7 4208.95   44.10   0
  -1   2  -7 4178.51   52.65   0
  -1  -2   7 4038.38   43.52   0
   1  -2  -7 2864.24   38.36   0
   2   2  -7   -0.13   13.83   0
  -2   2  -7   -1.35   17.94   0
   2  -2  -7   19.48   16.76   0
  -2  -2   7    4.18   14.94   0
   3  -2  -7   10.48   15.49   0
  -3  -2   7   14.72   20.81   0
  -3   2   7   13.04   15.89   0
   3   2  -7   10.65   14.03   0
  -4  -2   7   96.70   14.91   0
  -4   2   7   91.42   22.15   0
   4   2  -7   88.54   14.59   0
   4  -2  -7   97.47   15.70   0
   5  -2  -7   26.93   14.08   0
  -5   2   7   22.92   14.71   0
  -5  -2   7   31.30   14.92   0
   5   2  -7   35.27   14.35   0
   6  -2  -7  479.18   19.60   0
  -6   2   7  484.36   20.32   0
  -6  -2   7  497.78   18.60   0
   6   2  -7  518.03   18.13   0
   7  -2  -7   54.57   13.87   0
  -7  -2   7   54.63   14.46   0
   7   2  -7   43.74   14.14   0
  -7   2   7   60.24   14.34   0
  -8  -2   7  784.96   18.23   0
   8   2  -7  780.41   17.81   0
  -8   2   7  744.53   19.20   0
   8  -2  -7  768.12   18.90   0
  -9   2  -7   75.94   12.56   0
   9  -2  -7   91.33   12.61   0
  -9  -2   7   72.78   12.11   0
   9   2  -7   69.05   11.95   0
  10   2  -7   26.20   11.64   0
 -10  -2  -7   25.62   10.92   0
 -10  -2   7   33.99   11.89   0
 -10   2  -7   28.28   11.52   0
  10  -2  -7   27.45   12.40   0
 -10   2   7   29.44   13.02   0
  11  -2  -7    8.60   11.90   0
  11   2  -7   15.33   11.04   0
 -11  -2  -7    2.49   11.96   0
 -11  -2   7   11.08   11.70   0
 -11   2   7   -1.13   12.60   0
 -11   2  -7   -7.00   11.34   0
  12  -2  -7   24.79   12.19   0
 -12  -2  -7   38.55   11.91   0
 -12  -2   7   27.12   11.31   0
 -12   2  -7   27.40   11.44   0
 -12   2   7   31.10   12.83   0
 -13  -2   7   16.01   11.88   0
 -13   2  -7   -2.27   11.70   0
 -13  -2  -7   -5.88   10.35   0
 -13   2   7   -3.04   11.48   0
  13  -2  -7   14.90   11.91   0
 -14  -2   7   -1.84   11.33   0
 -14  -2  -7   -1.30   11.11   0
 -14   2   7    5.69   12.08   0
 -14   2  -7   -0.11   11.52   0
 -15  -2  -7    2.37   10.76   0
 -15  -2   7    6.78   11.30   0
 -15   2  -7   -2.31   12.50   0
 -15   2   7    4.61   12.30   0
 -16   2  -7    5.06   12.03   0
 -16  -2   7   -1.05   11.99   0
 -16  -2  -7   15.18   12.09   0
 -16   2   7   -1.74   12.32   0
 -17  -2   7    2.97   12.39   0
 -17   2  -7    5.56   12.55   0
 -17   2   7    2.66   13.52   0
 -17  -2  -7   -6.29   11.91   0
   1  -3   7 5845.48   58.00   0
  -1   3  -7 6264.58   58.73   0
   1   3  -7 5915.34   49.66   0
  -1  -3   7 5577.55   47.83   0
  -2  -3   7   49.88   15.59   0
   2   3  -7   32.87   15.41   0
  -2   3  -7   39.09   17.17   0
   2  -3  -7   37.83   24.64   0
  -3  -3   7  528.18   19.15   0
  -3   3  -7  498.84   24.87   0
   3   3  -7  527.72   18.70   0
   3  -3  -7  519.81   20.87   0
  -4  -3   7    9.27   13.86   0
  -4   3   7   -0.28   15.03   0
   4  -3  -7    2.24   14.43   0
   4   3  -7   -0.35   13.33   0
   5  -3  -7 1671.99   31.24   0
  -5   3   7 1483.38   27.60   0
   5   3  -7 1574.52   24.11   0
  -5  -3   7 1607.73   24.75   0
  -6   3   7    3.24   15.57   0
   6   3  -7    8.43   14.82   0
  -6  -3   7   -8.76   14.23   0
   6  -3  -7    7.15   15.18   0
  -7  -3   7  970.14   23.79   0
   7  -3  -7  893.79   20.36   0
  -7   3   7  864.84   20.53   0
   7   3  -7  906.61   19.25   0
   8  -3  -7  347.25   15.68   0
   8   3  -7  317.01   14.08   0
  -8  -3   7  350.84   18.74   0
  -8   3   7  348.21   16.15   0
   9   3  -7  209.79   13.18   0
  -9  -3   7  189.62   12.63   0
  -9   3  -7  187.15   18.68   0
  -9   3   7  199.99   14.31   0
   9  -3  -7  210.01   13.91   0
 -10   3  -7    8.85   11.28   0
  10   3  -7   11.92   11.51   0
 -10  -3  -7   -1.08   10.80   0
 -10   3   7   12.74   13.06   0
  10  -3  -7   19.13   12.56   0
 -10  -3   7   -4.30   11.68   0
 -11   3  -7   94.01   14.04   0
 -11  -3   7   71.97   12.05   0
  11  -3  -7  114.00   17.85   0
 -11   3   7   99.24   12.87   0
  11   3  -7  104.77   12.21   0
 -11  -3  -7   81.64   12.22   0
  12  -3  -7    6.49   11.59   0
 -12   3  -7   -0.12   11.87   0
 -12  -3  -7    5.15   11.18   0
 -12   3   7   -5.34   12.39   0
 -12  -3   7    8.25   11.63   0
 -13  -3  -7   -2.52   11.42   0
 -13  -3   7    4.26   10.41   0
 -13   3   7   16.36   12.42   0
 -13   3  -7    0.44   11.70   0
  13  -3  -7    5.46   11.71   0
 -14  -3   7   -3.33   11.44   0
 -14   3  -7    6.92   11.43   0
 -14   3   7    6.78   11.64   0
 -14  -3  -7   -2.04   11.38   0
 -15  -3  -7   50.03   12.26   0
 -15   3  -7   43.52   13.09   0
 -15  -3   7   42.73   12.02   0
 -15   3   7   40.53   12.97   0
 -16  -3   7   13.90   10.80   0
 -16   3  -7    7.40   12.75   0
 -16  -3  -7   17.71   11.33   0
 -16   3   7   -8.02   12.59   0
 -17  -3   7   -5.11   11.96   0
 -17  -3  -7   -2.37   12.75   0
 -17   3   7    9.29   11.97   0
 -17   3  -7    2.98   12.21   0
   0  -4   7  213.47   18.55   0
   0   4  -7  222.77   18.38   0
  -1  -4   7 4355.23   42.22   0
  -1   4  -7 4358.38   48.02   0
   1  -4   7 3461.93   43.77   0
   1   4  -7 4394.58   42.19   0
  -2  -4   7  459.64   18.70   0
   2  -4   7  386.53   22.82   0
   2   4  -7  444.43   18.65   0
  -2   4  -7  457.59   22.54   0
   3   4  -7   14.40   13.48   0
  -3  -4   7   16.60   13.93   0
   3  -4  -7    0.29   16.02   0
  -3   4  -7    7.55   15.48   0
   4   4  -7  156.94   15.32   0
   4  -4  -7  175.86   16.93   0
  -4  -4   7  150.35   15.17   0
  -4   4  -7   84.13   17.03   0
   5   4  -7  155.68   15.38   0
  -5   4   7  159.39   18.11   0
  -5  -4   7  182.09   15.99   0
  -5   4  -7  106.12   18.61   0
   5  -4  -7  166.30   16.99   0
  -6   4   7   93.46   16.88   0
   6  -4  -7   83.48   21.68   0
  -6  -4   7   74.97   14.31   0
   6   4  -7   97.97   14.23   0
   7   4  -7  283.23   14.40   0
   7  -4  -7  279.73   15.75   0
  -7  -4   7  297.10   15.05   0
  -7   4   7  273.97   16.32   0
   8  -4  -7    2.24   12.05   0
  -8   4   7    1.54   18.44   0
  -8   4  -7    1.61   11.92   0
   8   4  -7  -20.66   11.42   0
  -8  -4   7    2.75   11.47   0
  -9   4  -7   52.17   12.71   0
   9   4  -7   39.21   11.73   0
   9  -4  -7   60.34   12.84   0
  -9  -4   7   69.93   17.10   0
  -9   4   7   68.27   18.88   0
 -10   4  -7    3.49   16.24   0
 -10  -4   7   -9.22   11.36   0
  10  -4  -7    4.85   12.08   0
 -10   4   7    8.33   12.43   0
  10   4  -7   -1.95   11.25   0
  11  -4  -7    3.00   12.12   0
 -11   4  -7   10.19   11.74   0
 -11  -4   7   -2.12   17.10   0
 -11  -4  -7   -3.10   11.07   0
 -11   4   7   13.96   12.24   0
 -12  -4   7   21.76   11.15   0
 -12   4  -7   16.57   12.19   0
 -12   4   7   13.61   12.42   0
  12  -4  -7    8.99   12.36   0
 -12  -4  -7   14.68   11.18   0
 -13   4  -7   12.52   11.21   0
 -13   4   7    7.61   12.52   0
 -13  -4   7   32.54   10.83   0
  13  -4  -7   12.40   12.34   0
 -13  -4  -7   13.27   10.95   0
 -14   4   7    6.73   12.05   0
 -14   4  -7    4.67   12.17   0
 -14  -4  -7   -4.22   15.30   0
 -14  -4   7    3.71   11.23   0
 -15  -4   7   37.92   11.77   0
 -15  -4  -7   24.11   11.34   0
 -15   4   7   30.74   13.04   0
 -15   4  -7   21.61   12.88   0
 -16  -4  -7   20.04   11.10   0
 -16   4  -7   14.19   13.20   0
 -16  -4   7   26.63   11.67   0
 -16   4   7    9.84   13.14   0
   1   5  -7 1061.53   23.09   0
   1  -5   7  657.80   23.11   0
  -1  -5   7 1056.60   23.76   0
  -1   5  -7 1078.64   26.77   0
  -2  -5   7   27.73   14.18   0
   2   5  -7   17.36   13.85   0
  -2   5  -7    7.68   14.96   0
   2  -5   7   31.41   22.45   0
  -3   5  -7   75.28   21.68   0
   3  -5   7   86.04   17.44   0
   3  -5  -7   94.94   23.00   0
  -3  -5   7   93.35   14.58   0
   3   5  -7   87.73   14.37   0
   4  -5  -7    7.59   15.49   0
  -4  -5   7    3.36   14.31   0
  -4   5  -7   -1.85   14.61   0
   4   5  -7   13.73   14.33   0
   5   5  -7  223.25   15.09   0
  -5  -5   7  213.99   15.79   0
   5  -5  -7  217.45   18.51   0
  -5   5  -7  225.82   27.85   0
   6   5  -7   65.11   13.78   0
   6  -5  -7   65.29   14.20   0
  -6  -5   7   70.71   14.24   0
  -6   5  -7   17.20   16.21   0
   7  -5  -7  370.57   16.42   0
  -7   5  -7  107.65   18.25   0
   7   5  -7  358.63   18.69   0
  -7  -5   7  346.27   14.89   0
  -7   5   7  332.63   17.20   0
  -8   5   7   36.03   13.42   0
   8   5  -7   44.62   11.16   0
   8  -5  -7   46.89   12.52   0
  -8   5  -7   36.69   18.59   0
  -8  -5   7   32.94   12.31   0
   9   5  -7   -9.39   12.06   0
  -9   5  -7    3.14   11.99   0
  -9   5   7   -0.95   12.97   0
   9  -5  -7    7.71   12.47   0
  -9  -5   7    8.84   17.56   0
 -10   5   7   57.51   14.03   0
  10  -5  -7   75.31   12.99   0
 -10   5  -7   58.73   13.72   0
 -10  -5   7   52.47   12.16   0
  10   5  -7   65.77   11.92   0
 -11  -5   7   58.09   16.35   0
 -11  -5  -7   55.20   12.22   0
 -11   5   7   45.99   13.44   0
 -11   5  -7   53.76   18.92   0
  11  -5  -7   55.23   12.64   0
 -12  -5   7   36.20   11.75   0
 -12   5  -7   30.43   12.14   0
  12  -5  -7   30.12   12.83   0
 -12   5   7   32.44   13.73   0
 -12  -5  -7   37.69   12.49   0
 -13  -5   7   35.54   11.49   0
  13  -5  -7   53.66   16.98   0
 -13   5   7   39.84   13.13   0
 -13  -5  -7   56.24   10.85   0
 -13   5  -7   42.38   13.43   0
 -14  -5  -7   18.25   10.93   0
 -14   5   7    9.10   18.10   0
 -14   5  -7    0.77   12.48   0
 -14  -5   7   10.98   11.15   0
 -15   5  -7    3.85   11.72   0
 -15   5   7   -0.59   12.79   0
 -15  -5   7   10.54   11.30   0
 -15  -5  -7  -17.15   11.46   0
 -16   5   7    3.82   12.42   0
 -16  -5   7   14.42   12.11   0
 -16  -5  -7   16.28   11.67   0
 -16   5  -7    3.09   12.50   0
   0   6  -7  104.47   14.90   0
   0  -6   7  106.68   15.34   0
   1  -6   7    3.78   14.78   0
  -1  -6   7   -5.03   13.81   0
   1   6  -7   -5.87   13.36   0
  -1   6  -7    6.99   13.98   0
   2  -6   7   10.89   14.80   0
  -2   6  -7   -0.69   13.77   0
  -2  -6   7   -8.79   20.44   0
   2   6  -7   -2.44   14.19   0
  -3   6  -7  481.70   22.83   0
   3   6  -7  492.62   17.70   0
   3  -6   7  463.92   23.20   0
  -3  -6   7  496.31   18.35   0
  -4   6  -7   60.09   23.17   0
   4   6  -7   56.18   15.32   0
  -4  -6   7   57.19   15.92   0
   4  -6  -7   67.11   17.37   0
  -5  -6   7   32.50   14.38   0
   5  -6  -7   27.89   15.97   0
  -5   6  -7   33.72   22.02   0
   5   6  -7   29.16   13.64   0
  -6  -6   7   24.73   11.65   0
  -6   6  -7    8.23   14.05   0
   6  -6  -7   18.32   12.45   0
   6   6  -7   34.64   12.38   0
   7   6  -7   40.17   11.82   0
   7  -6  -7   27.55   12.59   0
  -7  -6   7   25.89   12.37   0
   8   6  -7   13.19   11.64   0
   8  -6  -7    1.34   11.97   0
  -8  -6   7   22.32   11.91   0
  -8   6  -7    6.29   21.88   0
  -8   6  -7    5.17   17.08   0
  -9   6  -7   98.10   23.81   0
  -9   6  -7  102.65   21.72   0
  -9   6   7  112.65   14.78   0
   9   6  -7   96.09   12.87   0
   9  -6  -7  122.30   13.45   0
  -9  -6   7   99.68   12.73   0
  10  -6  -7   76.87   13.10   0
 -10  -6   7   90.46   13.03   0
 -10   6  -7   54.90   15.54   0
 -10   6   7   78.79   14.17   0
 -11  -6   7   -7.22   12.06   0
 -11  -6  -7  -10.69   11.07   0
 -11   6  -7    4.59   12.74   0
  11  -6  -7    2.95   12.02   0
 -11   6   7   -6.61   12.74   0
  12  -6  -7    6.59   12.13   0
 -12  -6  -7   10.26   11.63   0
 -12  -6   7   13.88   12.00   0
 -12   6   7    8.42   12.51   0
 -12   6  -7    6.71   16.89   0
 -13  -6  -7   22.09   11.46   0
 -13   6   7   11.76   12.27   0
  13  -6  -7   23.07   12.11   0
 -13  -6   7   27.05   11.04   0
 -13   6  -7    8.95   18.82   0
 -14   6   7   -3.70   13.68   0
 -14  -6   7   21.03   11.49   0
 -14  -6  -7    8.92   10.81   0
 -14   6  -7    7.16   12.47   0
 -15  -6   7   27.76   11.31   0
 -15   6   7   18.12   13.60   0
 -15  -6  -7   25.14   11.47   0
 -15   6  -7   12.02   19.07   0
 -16   6   7   -1.50   13.52   0
 -16   6  -7   -0.35   12.52   0
 -16  -6   7   -3.08   10.94   0
 -16  -6  -7   19.04   11.88   0
  -1   7  -7 1143.62   25.05   0
   1  -7   7 1247.49   26.43   0
  -1  -7   7 1203.17   23.92   0
   1   7  -7 1230.48   23.67   0
  -2  -7   7  146.34   16.20   0
  -2   7  -7  154.34   16.12   0
   2  -7   7  149.98   17.01   0
   2   7  -7  145.95   15.44   0
   3   7  -7  303.81   16.69   0
  -3   7  -7  297.68   19.03   0
  -3  -7   7  233.47   16.39   0
   3  -7   7  272.44   19.43   0
   4   7  -7   36.51   13.96   0
  -4  -7   7   52.42   14.42   0
   4  -7  -7   39.50   17.84   0
   4  -7   7   46.84   18.02   0
  -4   7  -7   41.38   16.01   0
   5   7  -7  632.27   16.89   0
   5  -7  -7  580.49   20.75   0
  -5  -7   7  619.68   16.87   0
  -5   7  -7  601.84   35.05   0
   6   7  -7    4.00   11.40   0
   6  -7  -7   11.06   12.99   0
  -6  -7   7   10.26   11.17   0
   7  -7  -7  442.08   21.66   0
  -7  -7   7  414.06   14.92   0
   7   7  -7  427.18   14.66   0
   8   7  -7    4.37   11.90   0
   8  -7  -7   -0.38   11.70   0
  -8  -7   7   -2.67   11.78   0
  -9  -7   7   50.50   12.78   0
   9  -7  -7   33.12   11.71   0
 -10  -7   7   58.63   12.53   0
  10  -7  -7   69.61   13.39   0
  11  -7  -7   31.91   12.39   0
 -11  -7  -7   38.18   11.77   0
 -11  -7   7   48.30   12.04   0
 -12  -7   7  -10.85   11.90   0
  12  -7  -7    2.35   12.24   0
  13  -7  -7   39.24   12.25   0
 -13  -7   7   61.71   11.82   0
 -13  -7  -7   32.39   11.57   0
 -14  -7  -7   18.13   16.24   0
 -14  -7   7   12.09   11.59   0
 -15  -7   7    6.96   11.00   0
 -15  -7  -7    2.70   12.22   0
 -16  -7  -7   -9.96   16.31   0
 -16  -7   7   -3.74   11.84   0
   0  -8   7   40.98   16.10   0
   0   8  -7   37.08   14.42   0
   1  -8   7  223.49   17.64   0
   1   8  -7  230.82   16.47   0
  -1  -8   7  245.50   16.93   0
  -1   8  -7  226.17   16.55   0
   2  -8   7  137.92   17.15   0
  -2  -8   7  140.29   15.66   0
   2   8  -7  151.03   21.24   0
  -2   8  -7  140.74   15.85   0
  -3  -8   7   90.26   15.53   0
  -3   8  -7   86.70   14.89   0
   3   8  -7   92.44   15.10   0
   3  -8   7   82.28   16.11   0
   4  -8   7   68.51   16.49   0
   4   8  -7  106.75   13.14   0
  -4   8  -7   78.91   16.00   0
  -4  -8   7   89.48   14.02   0
   5  -8  -7   80.72   14.70   0
   5   8  -7   46.57   11.96   0
  -5  -8   7   81.76   12.49   0
   6  -8  -7   14.64   12.75   0
  -6  -8   7   23.78   11.33   0
   6   8  -7   21.85   11.40   0
  -7  -8   7  314.00   13.79   0
   7  -8  -7  349.34   16.70   0
   7   8  -7  335.71   13.99   0
   8  -8  -7   38.03   13.06   0
  -8  -8   7   52.81   12.46   0
   9  -8  -7  160.67   13.98   0
  -9  -8   7  317.25   13.95   0
 -10  -8   7   -4.90   11.81   0
  10  -8  -7    7.21   11.05   0
 -11  -8   7   24.28   11.59   0
  11  -8  -7   19.66   12.02   0
 -11  -8  -7   16.90   11.11   0
  12  -8  -7   28.09   12.25   0
 -12  -8  -7    5.61   16.18   0
 -12  -8   7   37.53   12.01   0
  13  -8  -7   11.60   12.25   0
 -13  -8  -7   24.40   10.97   0
 -13  -8   7   19.38   11.39   0
 -14  -8   7   22.70   15.88   0
 -14  -8  -7   10.88   11.01   0
 -15  -8   7   39.56   11.91   0
 -15  -8  -7   43.07   12.98   0
 -16  -8   7  -13.26   12.39   0
 -16  -8  -7   -4.33   11.26   0
   1   9  -7  115.49   15.07   0
  -1  -9   7  119.20   15.59   0
  -1   9  -7   91.11   14.82   0
   1  -9   7  130.52   15.93   0
   2  -9   7   67.11   14.94   0
   2   9  -7   78.48   14.02   0
  -2   9  -7   50.62   13.36   0
  -2  -9   7   64.46   14.33   0
  -3  -9   7  320.69   15.88   0
   3  -9   7  311.45   18.53   0
   3   9  -7  313.81   15.56   0
  -4  -9   7  143.95   13.37   0
   4  -9   7  132.46   17.09   0
   4   9  -7  119.74   13.13   0
   5   9  -7    2.89   10.69   0
   5  -9  -7   13.26   13.75   0
  -5  -9   7   15.12   11.98   0
  -6  -9   7   28.06   11.48   0
   6  -9  -7   -3.72   17.39   0
   7  -9  -7   32.38   12.88   0
  -7  -9   7   56.98   12.28   0
   8  -9  -7   54.22   13.43   0
  -8  -9   7   59.89   16.57   0
   9  -9  -7  104.38   14.59   0
  -9  -9   7  114.72   12.65   0
 -10  -9  -7    7.79   11.57   0
 -10  -9   7   -0.37   11.29   0
  10  -9  -7    6.18   11.82   0
 -11  -9  -7   27.01   12.44   0
  11  -9  -7   53.34   17.95   0
 -11  -9   7   42.26   12.01   0
 -12  -9  -7  -32.27   17.60   0
 -12  -9   7   -5.92   11.59   0
  12  -9  -7    5.92   11.15   0
 -13  -9   7  -11.64   11.33   0
 -13  -9  -7    3.99   11.10   0
  13  -9  -7    4.23   13.06   0
 -14  -9  -7   -0.77   11.32   0
 -14  -9   7    7.82   11.07   0
 -15  -9  -7   -3.49   12.44   0
 -15  -9   7   17.74   12.53   0
   0 -10   7   59.44   13.84   0
  -1 -10   7  153.60   14.80   0
   1  10  -7  256.85   15.14   0
   1 -10   7  265.27   15.78   0
   2  10  -7    3.62   12.58   0
   2 -10   7    7.19   12.36   0
  -2 -10   7   10.61   13.02   0
  -3 -10   7  439.82   19.79   0
   3 -10   7  174.46   14.98   0
   3  10  -7  416.99   14.97   0
  -4 -10   7   37.04   12.16   0
   4 -10   7   12.18   13.17   0
  -5 -10   7   26.84   12.36   0
   5 -10  -7   15.37   13.46   0
   5 -10   7   18.81   19.74   0
   6 -10  -7   16.27   18.31   0
  -6 -10   7   29.49   12.20   0
   7 -10  -7   91.84   13.68   0
  -7 -10   7  104.78   11.86   0
  -8 -10   7   61.27   11.82   0
   8 -10  -7   71.62   14.41   0
   9 -10  -7   79.56   14.12   0
  -9 -10   7   51.55   11.67   0
 -10 -10  -7   14.57   11.73   0
  10 -10  -7   24.07   12.82   0
 -10 -10   7   33.95   11.23   0
 -11 -10  -7   61.69   12.68   0
 -11 -10   7   70.51   11.95   0
  11 -10  -7   62.93   12.94   0
 -12 -10  -7   -7.16   11.44   0
  12 -10  -7    5.59   11.92   0
 -12 -10   7    9.45   11.32   0
 -13 -10  -7  108.74   12.63   0
 -13 -10   7   83.38   12.75   0
  13 -10  -7   83.38   14.17   0
 -14 -10   7  -12.36   11.37   0
 -14 -10  -7  -10.54   10.92   0
 -15 -10  -7    4.31   11.00   0
 -15 -10   7   15.11   11.89   0
   1 -11   7  470.51   16.83   0
  -1 -11   7  599.94   17.25   0
  -2 -11   7   -1.79   12.68   0
   2 -11   7   10.11   12.05   0
  -3 -11   7   46.93   12.10   0
   3 -11   7   50.21   12.70   0
  -4 -11   7    5.58   11.37   0
   4 -11   7    9.94   12.59   0
  -5 -11   7   73.28   12.61   0
   5 -11   7   40.35   13.66   0
  -6 -11   7   34.19   11.77   0
   6 -11  -7   20.98   13.63   0
   7 -11  -7   34.64   18.06   0
  -7 -11   7   28.10   11.58   0
   8 -11  -7   18.18   12.93   0
  -8 -11   7   30.66   11.08   0
  -9 -11   7   17.97   11.55   0
   9 -11  -7   16.97   12.61   0
 -10 -11  -7  -19.84   12.32   0
  10 -11  -7   -0.69   11.57   0
 -10 -11   7  -10.32   11.70   0
 -11 -11  -7  103.38   12.72   0
  11 -11  -7  103.01   14.68   0
 -11 -11   7   80.94   12.35   0
 -12 -11  -7   12.60   11.70   0
  12 -11  -7    2.38   11.63   0
 -12 -11   7    9.07   11.01   0
 -13 -11  -7  -12.11   11.50   0
 -14 -11  -7   10.73   11.55   0
 -14 -11   7    8.21   11.74   0
 -15 -11   7   14.91   11.66   0
 -15 -11  -7  -20.14   12.23   0
   0 -12   7    8.26   11.73   0
   1 -12   7  311.46   15.25   0
  -1 -12   7  320.19   14.53   0
   2 -12   7   49.69   13.21   0
  -2 -12   7   41.56   12.21   0
  -3 -12   7    2.01   12.01   0
   3 -12   7    1.98   12.38   0
  -4 -12   7   27.04   11.76   0
   4 -12   7   22.07   13.14   0
  -5 -12   7  195.28   13.12   0
   5 -12   7  153.82   16.46   0
  -6 -12   7   -9.61   11.68   0
   6 -12  -7   10.92   13.65   0
   7 -12  -7   43.07   14.19   0
  -7 -12   7   55.03   11.05   0
  -8 -12   7   -3.72   10.89   0
   8 -12  -7   -3.27   12.84   0
   9 -12  -7   19.95   12.34   0
  -9 -12   7   32.48   11.66   0
 -10 -12   7   12.09   11.76   0
 -10 -12  -7   14.15   11.53   0
  10 -12  -7   34.01   12.38   0
  11 -12  -7  109.77   19.40   0
 -11 -12   7   84.23   11.68   0
 -12 -12  -7   29.33   12.13   0
  12 -12  -7   23.02   13.18   0
 -12 -12   7   28.45   11.83   0
 -13 -12  -7  102.90   12.09   0
 -14 -12  -7   -4.46   11.70   0
 -14 -12   7   -6.44   11.87   0
  -1 -13   7   -4.07   16.69   0
   1 -13   7   13.80   17.03   0
  -2 -13   7   12.24   12.09   0
   2 -13   7    7.55   12.55   0
  -3 -13   7  101.99   13.90   0
   3 -13   7  112.44   13.40   0
   4 -13   7    7.43   11.92   0
  -4 -13   7   -1.69   12.59   0
  -5 -13   7  118.13   13.14   0
   5 -13   7  104.03   19.82   0
   6 -13  -7   13.56   13.12   0
  -6 -13   7   10.04   11.34   0
   7 -13  -7    8.96   13.37   0
  -7 -13   7   18.43   11.44   0
  -8 -13   7   49.74   16.76   0
   8 -13  -7   12.16   12.12   0
   9 -13  -7    3.07   11.44   0
  -9 -13   7   13.17   10.84   0
  10 -13  -7    2.27   17.46   0
 -10 -13  -7   14.22   11.96   0
  11 -13  -7   -4.09   16.96   0
 -11 -13  -7    7.07   11.59   0
 -11 -13   7   -5.36   11.06   0
 -12 -13  -7   11.34   11.55   0
  12 -13  -7   -2.39   11.90   0
 -13 -13  -7   16.68   11.54   0
 -13 -13   7   24.20   11.64   0
 -14 -13   7   11.01   11.97   0
 -14 -13  -7    7.74   12.10   0
   0 -14   7    4.67   12.29   0
  -1 -14   7    6.17   10.99   0
   1 -14   7    7.36   12.32   0
  -2 -14   7    6.46   11.94   0
   2 -14   7    7.18   12.11   0
  -3 -14   7   32.85   11.65   0
   3 -14   7   20.57   11.82   0
  -4 -14   7   10.34   12.40   0
   4 -14   7   11.81   17.89   0
  -5 -14   7  357.96   14.70   0
   5 -14   7  352.32   19.84   0
  -6 -14   7   90.24   12.38   0
   6 -14   7   75.79   20.88   0
   6 -14  -7   91.90   14.50   0
  -7 -14   7   90.19   12.46   0
   7 -14  -7   67.59   13.78   0
  -8 -14   7   16.72   11.18   0
   8 -14  -7   31.69   12.40   0
   9 -14  -7  101.72   18.30   0
  -9 -14   7   82.72   11.56   0
  -9 -14  -7   77.20   11.68   0
 -10 -14  -7    3.38   10.82   0
  10 -14  -7    0.85   12.11   0
 -10 -14   7   -8.61   10.55   0
 -11 -14   7  139.31   12.42   0
 -11 -14  -7  171.72   13.65   0
  11 -14  -7  164.97   22.12   0
 -12 -14  -7  -12.09   11.22   0
 -13 -14  -7   11.87   17.00   0
 -13 -14   7   18.57   11.58   0
  -1 -15   7   10.33   11.96   0
   1 -15   7    4.62   12.85   0
  -2 -15   7  140.13   13.31   0
   2 -15   7  141.39   12.99   0
  -3 -15   7   14.52   11.54   0
   3 -15   7   22.09   12.09   0
   4 -15   7   14.26   12.00   0
  -4 -15   7   19.23   12.00   0
   5 -15   7  161.83   19.79   0
  -5 -15   7  148.98   13.39   0
  -6 -15   7  108.12   12.93   0
   6 -15   7  100.06   19.88   0
  -7 -15   7   -5.00   11.73   0
   7 -15  -7    9.29   11.78   0
  -8 -15   7  -12.38   10.75   0
   8 -15  -7    0.22   11.33   0
  -9 -15   7  -20.79   11.01   0
   9 -15  -7    6.36   11.93   0
  10 -15  -7   -0.28   11.71   0
 -10 -15  -7    6.44   11.20   0
 -10 -15   7   -1.80   11.40   0
 -11 -15   7   27.25   11.55   0
  11 -15  -7   13.55   18.51   0
 -11 -15  -7   12.31   16.14   0
 -12 -15  -7   -0.43   11.33   0
 -13 -15  -7   10.83   12.09   0
 -13 -15   7    7.99   12.08   0
   0 -16   7   13.90   12.89   0
  -1 -16   7   29.00   17.74   0
   1 -16   7   38.79   12.60   0
  -2 -16   7   68.86   13.16   0
   2 -16   7   61.07   13.04   0
  -3 -16   7   -7.36   11.49   0
   3 -16   7    1.12   12.01   0
   4 -16   7    2.62   12.16   0
  -4 -16   7   15.42   11.30   0
  -5 -16   7   88.10   12.60   0
   5 -16   7   56.91   13.33   0
  -6 -16   7   31.34   11.93   0
   6 -16   7   36.93   13.81   0
  -7 -16   7    5.98   11.82   0
   7 -16  -7   -0.30   12.85   0
   8 -16  -7    4.55   12.27   0
  -8 -16  -7    9.92   10.59   0
  -9 -16   7  151.94   12.30   0
  -9 -16  -7  137.31   12.63   0
   9 -16  -7  119.91   19.07   0
  10 -16  -7    3.90   16.88   0
 -10 -16  -7   -6.84   10.79   0
 -11 -16  -7   91.51   12.21   0
 -11 -16   7  103.76   12.01   0
 -12 -16  -7    9.09   12.53   0
  -1 -17   7    4.40   11.89   0
   1 -17   7   12.74   11.82   0
   2 -17   7   23.61   12.53   0
  -2 -17   7   20.39   12.03   0
  -3 -17   7   60.37   12.25   0
   3 -17   7   70.20   18.25   0
   4 -17   7   14.64   11.66   0
  -4 -17   7   11.26   11.77   0
   5 -17   7   -0.98   12.07   0
  -5 -17   7    6.42   12.25   0
  -6 -17   7  181.16   13.33   0
   6 -17   7  184.81   22.16   0
  -7 -17   7    7.43   11.26   0
   7 -17  -7   -4.02   17.72   0
  -8 -17  -7   43.10   11.78   0
   8 -17  -7   39.19   13.40   0
  -8 -17   7   62.56   12.30   0
  -9 -17   7   -2.23   11.45   0
   9 -17  -7   -0.44   17.08   0
  -9 -17  -7  -11.84   11.10   0
  10 -17  -7    7.69   13.46   0
 -10 -17  -7   -8.99   11.22   0
 -11 -17  -7   -1.76   11.62   0
 -11 -17   7   10.23   11.71   0
   0 -18   7   14.60   10.87   0
   1 -18   7    8.26   10.65   0
  -1 -18   7   -6.89   12.27   0
   2 -18   7   16.60   11.01   0
  -2 -18   7  -30.90   16.03   0
  -3 -18   7   30.32   11.35   0
   3 -18   7   28.42   17.62   0
  -4 -18   7   77.53   12.83   0
   4 -18   7   72.93   12.86   0
   5 -18   7   30.25   13.71   0
  -5 -18   7   42.91   11.12   0
  -6 -18   7   90.88   12.05   0
   6 -18   7   81.04   18.95   0
   7 -18  -7   10.25   13.91   0
  -7 -18  -7   -2.69   11.67   0
   8 -18  -7   16.11   17.73   0
  -8 -18   7   27.81   12.37   0
  -8 -18  -7   16.88   10.85   0
  -9 -18  -7  122.25   12.51   0
   9 -18  -7   92.10   15.94   0
  -9 -18   7  109.52   12.34   0
 -10 -18  -7   36.51   12.21   0
  10 -18  -7    4.67   17.84   0
  10 -18  -7    1.16   12.81   0
 -11 -18   7   44.16   11.77   0
 -11 -18  -7   10.61   12.44   0
   1 -19   7   44.45   12.25   0
  -1 -19   7   47.14   11.37   0
   2 -19   7    8.06   11.87   0
  -2 -19   7    4.56   12.02   0
  -3 -19   7   21.54   16.34   0
   3 -19   7    7.47   11.35   0
  -4 -19   7   21.38   11.40   0
   4 -19   7   11.56   12.36   0
  -5 -19   7   -6.80   11.23   0
   5 -19   7    2.06   17.33   0
   6 -19   7   13.25   12.44   0
  -6 -19  -7   20.53   11.42   0
  -7 -19  -7    2.72   12.06   0
   7 -19  -7   -4.88   18.54   0
  -7 -19   7   13.13   12.14   0
   8 -19  -7    4.88   13.12   0
  -8 -19  -7   18.48   12.13   0
  -8 -19   7   22.94   12.28   0
   9 -19  -7   -1.04   16.98   0
   9 -19  -7    6.20   18.44   0
  -9 -19  -7   -6.92   11.69   0
  -9 -19   7   -0.02   11.81   0
  10 -19  -7   -0.44   17.90   0
 -10 -19  -7   -5.49   11.35   0
  10 -19  -7   -0.02   17.88   0
   0 -20   7  141.46   13.76   0
   1 -20   7   20.22   12.59   0
  -1 -20   7   -5.14   15.91   0
   2 -20   7  -14.94   11.31   0
  -2 -20   7   15.67   12.04   0
   3 -20   7  101.78   14.38   0
  -3 -20   7  113.94   12.86   0
  -4 -20   7   15.05   11.14   0
   4 -20   7   15.96   13.19   0
   5 -20   7    9.55   17.67   0
  -5 -20  -7    8.63   10.66   0
  -5 -20   7   -3.24   10.67   0
  -6 -20   7    4.54   11.16   0
   6 -20   7    3.23   12.92   0
   7 -20  -7   17.16   14.33   0
  -7 -20  -7   19.42   11.59   0
  -7 -20   7   26.50   11.36   0
   8 -20  -7   -0.57   12.45   0
   8 -20  -7    4.26   19.03   0
  -8 -20  -7   -9.92   11.87   0
  -8 -20   7    4.93   12.05   0
   9 -20  -7   47.64   14.41   0
   9 -20  -7   45.55   14.29   0
  -9 -20  -7   68.80   12.69   0
  -1 -21   7   10.92   11.76   0
   1 -21   7   11.01   11.37   0
   2 -21   7   10.86   12.17   0
  -2 -21   7    6.52   11.94   0
   3 -21   7    8.92   12.26   0
  -3 -21   7    9.94   11.60   0
  -4 -21  -7   10.54   10.92   0
  -4 -21   7   10.09   10.97   0
   4 -21   7   -9.78   17.64   0
   5 -21   7    4.72   12.41   0
  -5 -21  -7   15.42   11.54   0
  -5 -21   7    4.86   12.48   0
  -6 -21  -7    9.62   11.70   0
   6 -21   7    3.01   17.77   0
  -6 -21   7    3.94   12.70   0
   7 -21  -7    0.41   17.90   0
   7 -21  -7   -2.77   13.96   0
  -7 -21  -7    3.71   12.55   0
  -7 -21   7    3.33   11.99   0
   0 -22   7  -12.73   11.91   0
   1 -22   7   10.92   12.49   0
  -1 -22   7   11.64   12.57   0
  -1 -22  -7    2.22   11.36   0
  -2 -22   7  -10.25   12.02   0
   2 -22   7   -4.26   12.66   0
  -2 -22  -7   10.12   11.06   0
  -3 -22  -7   -2.86   16.92   0
  -3 -22   7    7.00   11.02   0
   3 -22   7    2.05   12.37   0
  -4 -22   7   -2.77   12.21   0
   4 -22   7    2.12   13.22   0
   4 -22  -7   -5.65   11.97   0
  -4 -22  -7    5.20   11.84   0
   5 -22   7   20.22   12.44   0
   5 -22  -7   26.22   13.13   0
  -5 -22  -7   38.19   17.24   0
  -5 -22   7   13.35   12.06   0
  -6 -22  -7   13.91   12.35   0
   6 -22   7   -0.99   12.88   0
   6 -22  -7   -4.42   12.37   0
   1 -23  -7   31.90   12.23   0
  -1 -23  -7   16.15   12.19   0
  -1 -23   7   19.78   12.64   0
   1 -23   7   17.69   12.56   0
   2 -23   7    9.35   17.26   0
  -2 -23  -7    7.81   11.05   0
  -2 -23   7    9.88   12.19   0
   2 -23  -7   -0.93   17.74   0
  -3 -23  -7   17.66   13.36   0
   3 -23   7   19.61   13.49   0
   3 -23  -7   12.56   12.92   0
  -3 -23   7   31.23   12.42   0
   0   0  -8  428.62   22.20   0
  -1   0   8   45.61   16.78   0
   1   0  -8   52.41   16.49   0
  -2   0   8 1442.33   27.44   0
   2   0  -8 1501.50   27.53   0
  -3   0   8  282.28   18.61   0
   3   0  -8  298.75   17.71   0
   4   0  -8   15.02   13.84   0
  -4   0   8   16.61   14.27   0
  -5   0   8  130.05   16.41   0
   5   0  -8  133.27   16.06   0
   6   0  -8  234.99   17.26   0
  -6   0   8  146.95   16.30   0
  -7   0   8  553.06   18.34   0
   7   0  -8  587.43   18.07   0
   8   0  -8   65.68   12.74   0
  -8   0   8   59.67   13.33   0
  -9   0   8  144.45   13.08   0
   9   0  -8  133.15   12.64   0
  10   0  -8    7.00   10.94   0
 -10   0   8   18.60   11.90   0
 -11   0  -8  105.17   13.05   0
 -11   0   8  110.19   13.59   0
  11   0  -8  112.66   12.58   0
  12   0  -8   25.47   12.32   0
 -12   0  -8    8.06   11.67   0
 -12   0   8    8.24   17.68   0
 -13   0  -8   14.88   16.61   0
  13   0  -8   27.23   12.04   0
 -13   0   8   19.00   10.93   0
 -14   0  -8   -3.92   11.15   0
 -14   0   8   -5.66   16.52   0
 -15   0  -8   29.05   15.88   0
 -15   0   8   24.14   11.07   0
 -16   0  -8   -6.52   11.74   0
 -16   0   8   19.78   12.31   0
 -17   0   8   15.95   12.64   0
 -17   0  -8   11.13   12.05   0
  -1   1  -8   34.75   19.05   0
  -1  -1   8   38.84   17.17   0
   1   1  -8   15.05   16.51   0
   1  -1  -8   27.46   16.56   0
   2   1  -8  104.80   16.86   0
  -2   1   8   91.11   17.50   0
  -2  -1   8  115.93   15.32   0
   2  -1  -8  108.65   17.62   0
   3   1  -8   22.32   14.32   0
  -3   1   8   28.28   15.43   0
  -3  -1   8   20.89   15.06   0
   3  -1  -8   20.39   15.67   0
   4  -1  -8  457.68   18.44   0
   4   1  -8  461.78   18.14   0
  -4   1   8  453.36   18.75   0
  -4  -1   8  484.36   23.08   0
  -5   1   8   -8.33   15.90   0
   5   1  -8  -32.32   20.71   0
   5  -1  -8   11.76   14.68   0
  -5  -1   8    1.97   15.51   0
  -6  -1   8   61.65   15.40   0
  -6   1   8   70.83   15.78   0
   6  -1  -8   73.58   15.56   0
   6   1  -8   74.73   14.77   0
   7   1  -8   -2.15   13.36   0
  -7  -1   8    6.99   19.52   0
   7  -1  -8    2.68   13.48   0
  -7   1   8    5.89   13.93   0
  -8  -1   8   81.19   13.32   0
   8   1  -8   76.90   17.36   0
   8  -1  -8   74.07   12.85   0
  -8   1   8   63.12   13.10   0
   9   1  -8   64.50   15.73   0
   9  -1  -8   40.51   12.36   0
  -9  -1   8   39.20   12.16   0
  -9   1   8   45.99   12.60   0
 -10  -1   8   -8.68   11.42   0
 -10   1   8    4.31   12.85   0
 -10   1  -8   15.50   11.57   0
  10  -1  -8   -9.26   16.26   0
  10   1  -8   -4.44   11.27   0
 -11   1  -8    8.78   11.31   0
 -11  -1   8    8.37   11.53   0
 -11  -1  -8    9.94   11.74   0
  11  -1  -8   16.95   12.19   0
  11   1  -8   16.80   11.56   0
 -11   1   8   12.17   12.41   0
 -12  -1   8   15.91   11.78   0
 -12   1  -8    9.46   16.69   0
  12  -1  -8   -4.32   11.79   0
 -12  -1  -8    0.58   11.58   0
  12   1  -8   10.03   11.52   0
 -12   1   8   10.63   12.07   0
 -13  -1   8   -9.10   11.96   0
 -13  -1  -8    5.31   11.56   0
 -13   1   8    6.42   11.79   0
 -13   1  -8    1.93   11.63   0
  13  -1  -8   18.10   15.45   0
 -14   1  -8   12.26   11.42   0
 -14  -1  -8   -1.31   11.65   0
 -14   1   8   12.22   11.78   0
 -14  -1   8   24.37   11.44   0
 -15  -1  -8    3.24   11.31   0
 -15   1   8   -1.34   11.83   0
 -15   1  -8   -3.16   12.01   0
 -15  -1   8   25.82   16.49   0
 -16  -1  -8   -4.28   12.04   0
 -16   1   8    1.41   12.48   0
 -16   1  -8    0.70   11.73   0
 -16  -1   8   -6.63   11.34   0
 -17   1  -8   -2.96   12.53   0
 -17   1   8    3.87   12.80   0
 -17  -1   8    5.28   11.89   0
 -17  -1  -8    8.70   12.06   0
   0  -2   8  379.99   20.90   0
   0   2  -8  382.92   21.07   0
   1  -2   8   27.03   18.33   0
  -1   2  -8   28.36   17.73   0
  -1  -2   8   15.17   15.95   0
   1  -2  -8   25.67   17.69   0
   1   2  -8   13.75   15.77   0
   2   2  -8  126.73   16.31   0
  -2   2  -8  122.04   18.65   0
  -2  -2   8  120.96   16.41   0
   2  -2  -8  123.99   17.84   0
   3   2  -8   80.51   14.92   0
   3  -2  -8  103.09   16.17   0
  -3   2   8   78.04   16.31   0
  -3  -2   8   83.43   21.37   0
  -4  -2   8  299.69   16.70   0
   4  -2  -8  299.38   18.01   0
   4   2  -8  302.22   16.54   0
  -4   2   8  281.69   23.69   0
  -5  -2   8   -0.90   14.85   0
   5  -2  -8   -1.81   15.55   0
  -5   2   8    0.84   15.02   0
   5   2  -8   11.42   13.78   0
   6   2  -8  632.09   19.03   0
  -6  -2   8  613.46   19.53   0
  -6   2   8  584.54   20.75   0
   6  -2  -8  626.48   20.32   0
  -7  -2   8  142.82   14.71   0
   7  -2  -8  161.02   14.59   0
  -7   2   8  155.83   14.87   0
   7   2  -8  166.51   14.83   0
  -8  -2   8  925.68   18.79   0
   8  -2  -8 1058.46   20.70   0
   8   2  -8 1030.40   18.89   0
  -8   2   8  986.94   20.49   0
  -9  -2   8  234.52   13.19   0
   9  -2  -8  323.15   15.57   0
   9   2  -8  328.22   13.84   0
  -9   2   8  277.00   15.53   0
  10   2  -8  -14.03   11.71   0
 -10  -2   8    9.58   11.91   0
  10  -2  -8    4.80   16.90   0
 -10   2   8   11.88   12.22   0
 -10   2  -8   -1.29   11.33   0
  11  -2  -8  107.44   12.59   0
  11   2  -8  103.11   11.91   0
 -11  -2   8  123.57   12.67   0
 -11  -2  -8  104.44   12.91   0
 -11   2  -8  106.00   12.48   0
 -11   2   8   96.29   13.76   0
 -12  -2  -8   10.24   11.72   0
  12  -2  -8    4.45   11.98   0
 -12  -2   8   -6.53   12.14   0
 -12   2   8    2.52   12.35   0
 -12   2  -8    9.58   11.11   0
  12   2  -8    4.58   11.21   0
 -13  -2   8  120.24   13.34   0
 -13  -2  -8  140.41   12.62   0
  13  -2  -8  115.16   13.44   0
 -13   2   8   77.18   12.42   0
 -13   2  -8  119.30   13.20   0
 -14  -2   8   -4.51   16.50   0
 -14   2   8   -0.45   12.13   0
 -14   2  -8    3.43   16.09   0
 -14  -2  -8   -2.39   11.50   0
 -15  -2   8   51.73   12.80   0
 -15   2  -8   39.38   12.76   0
 -15   2   8   46.87   16.52   0
 -15  -2  -8   36.81   11.74   0
 -16  -2  -8    8.74   11.20   0
 -16   2   8   -6.34   12.64   0
 -16   2  -8    4.52   11.53   0
 -16  -2   8   11.37   11.53   0
 -17   2   8   52.11   13.03   0
 -17   2  -8   34.78   13.34   0
 -17  -2  -8   36.21   12.66   0
 -17  -2   8   38.28   13.36   0
   1  -3   8   15.78   23.15   0
  -1   3  -8    7.48   16.54   0
  -1  -3   8    7.87   15.55   0
   1   3  -8    8.19   15.54   0
   2   3  -8 1096.56   23.78   0
   2  -3  -8 1112.84   26.34   0
  -2   3  -8 1089.22   28.85   0
  -2  -3   8 1080.78   23.72   0
  -3  -3   8  182.48   16.45   0
  -3   3  -8  158.54   19.43   0
   3   3  -8  185.81   16.16   0
   3  -3  -8  160.28   17.11   0
  -4  -3   8   42.29   14.49   0
   4  -3  -8   36.42   14.91   0
  -4   3   8   43.33   22.59   0
   4   3  -8   44.75   13.99   0
   5   3  -8   -1.80   13.52   0
  -5   3   8    3.21   16.15   0
  -5  -3   8   12.34   15.08   0
   5  -3  -8    9.91   15.41   0
   6  -3  -8   13.40   14.88   0
   6   3  -8    9.26   14.62   0
  -6   3   8    2.93   15.50   0
  -6  -3   8   17.41   15.01   0
  -7  -3   8  244.52   15.11   0
   7  -3  -8  255.47   15.73   0
  -7   3   8  233.00   15.44   0
   7   3  -8  234.06   14.93   0
   8   3  -8    9.99   11.99   0
  -8   3   8   -3.39   12.43   0
  -8  -3   8    4.59   12.24   0
   8  -3  -8    5.30   11.92   0
  -9   3  -8    1.85   11.48   0
   9  -3  -8    6.87   11.20   0
   9   3  -8   18.17   11.59   0
  -9   3   8   -2.10   13.22   0
  -9  -3   8   -3.90   11.08   0
  10   3  -8   41.84   11.82   0
  10  -3  -8   43.91   12.17   0
 -10   3   8   54.33   13.84   0
 -10  -3   8   24.28   11.58   0
 -10   3  -8   50.62   12.59   0
 -11   3  -8   65.80   13.34   0
 -11  -3   8   53.22   11.84   0
 -11  -3  -8   55.13   11.67   0
 -11   3   8   50.68   12.94   0
  11   3  -8   62.15   12.12   0
  11  -3  -8   64.39   12.85   0
 -12   3   8    5.62   12.07   0
 -12  -3   8   10.66   11.15   0
 -12   3  -8   -7.84   12.12   0
  12  -3  -8    9.00   16.41   0
 -12  -3  -8    8.20   11.69   0
  12   3  -8    5.31   11.38   0
 -13   3  -8   -6.20   11.64   0
 -13  -3   8   11.57   11.41   0
  13  -3  -8   -0.31   11.37   0
 -13   3   8   -0.02   12.15   0
 -13  -3  -8    4.55   11.19   0
 -14  -3  -8   15.13   11.44   0
 -14  -3   8   43.05   11.57   0
 -14   3  -8   11.56   11.98   0
 -14   3   8   29.07   11.96   0
 -15  -3   8   24.42   11.15   0
 -15  -3  -8    0.15   12.15   0
 -15   3   8    8.91   12.14   0
 -15   3  -8    1.92   12.21   0
 -16  -3   8   -8.43   12.19   0
 -16   3  -8    0.92   12.24   0
 -16  -3  -8    2.16   11.31   0
 -16   3   8    6.12   12.47   0
   0   4  -8 2517.06   33.79   0
   0  -4   8 2429.51   33.82   0
   1   4  -8 1089.94   28.36   0
  -1   4  -8 1080.23   25.62   0
   1  -4   8 1050.49   30.79   0
  -1  -4   8 1075.38   24.04   0
  -2  -4   8 3184.29   33.84   0
   2  -4   8 3094.30   42.83   0
   2   4  -8 3180.14   33.67   0
  -2   4  -8 3218.33   43.09   0
  -3   4  -8  293.83   19.92   0
  -3  -4   8  295.03   16.47   0
   3  -4  -8  302.42   18.23   0
   3   4  -8  284.40   16.33   0
  -4   4  -8  177.46   19.02   0
   4   4  -8  196.12   15.52   0
  -4  -4   8  200.18   15.92   0
   4  -4  -8  178.05   17.11   0
  -5   4  -8  482.59   29.59   0
  -5  -4   8  475.96   18.17   0
   5   4  -8  504.04   17.63   0
   5  -4  -8  494.96   20.27   0
  -5   4   8  464.66   20.30   0
   6  -4  -8  342.74   17.76   0
  -6  -4   8  351.90   16.06   0
   6   4  -8  312.90   15.21   0
  -6   4   8  320.84   23.12   0
  -7   4   8  242.06   15.56   0
   7  -4  -8  264.47   15.35   0
  -7  -4   8  251.84   14.19   0
   7   4  -8  256.63   14.36   0
  -8  -4   8  344.60   14.17   0
   8   4  -8  358.95   14.84   0
  -8   4   8  336.79   16.41   0
   8  -4  -8  356.97   15.90   0
  -9  -4   8  237.90   13.57   0
  -9   4   8  215.12   15.27   0
   9   4  -8  240.24   13.14   0
   9  -4  -8  216.25   14.19   0
  -9   4  -8  215.00   15.62   0
 -10   4  -8    3.61   10.71   0
  10   4  -8    8.79   11.13   0
  10  -4  -8    6.78   12.63   0
 -10  -4   8  -18.16   12.09   0
 -10   4   8   -0.29   13.24   0
 -11   4   8  162.74   14.45   0
  11  -4  -8  195.21   13.91   0
 -11  -4  -8  166.23   12.70   0
 -11  -4   8  166.12   13.68   0
  11   4  -8  150.84   11.76   0
 -11   4  -8  175.54   15.60   0
 -12   4  -8   58.59   17.09   0
 -12  -4   8   51.93   12.09   0
 -12  -4  -8   45.46   12.37   0
 -12   4   8   42.15   13.02   0
  12  -4  -8   65.17   12.46   0
  13  -4  -8   95.84   12.67   0
 -13   4  -8   86.72   12.87   0
 -13  -4   8  100.87   11.44   0
 -13  -4  -8  109.72   12.56   0
 -13   4   8   93.51   13.24   0
 -14  -4  -8   14.09   10.63   0
 -14   4   8    6.04   17.38   0
 -14  -4   8   10.00   11.27   0
 -14   4  -8    4.05   12.30   0
 -15  -4   8  107.69   12.56   0
 -15   4  -8   80.86   13.92   0
 -15   4   8   86.24   14.10   0
 -15  -4  -8   89.21   12.59   0
 -16  -4   8    8.60   12.06   0
 -16   4   8    2.95   12.94   0
 -16   4  -8   -2.00   12.27   0
 -16  -4  -8   13.37   11.74   0
  -1   5  -8  547.90   20.40   0
  -1  -5   8  544.61   19.16   0
   1  -5   8  547.24   20.62   0
   1   5  -8  564.14   18.82   0
   2   5  -8  987.47   21.41   0
  -2   5  -8  974.02   26.26   0
   2  -5   8  963.31   30.84   0
  -2  -5   8  945.62   21.59   0
  -3   5  -8   41.68   15.68   0
   3   5  -8   34.75   14.42   0
   3  -5  -8   43.54   16.35   0
  -3  -5   8   36.85   14.13   0
   3  -5   8   34.98   16.92   0
  -4  -5   8  367.19   16.94   0
  -4   5  -8  154.01   17.69   0
   4   5  -8  350.36   16.72   0
   4  -5  -8  342.59   19.34   0
   5  -5  -8  819.86   23.06   0
  -5   5  -8  839.22   30.55   0
   5   5  -8  781.18   19.39   0
  -5  -5   8  803.02   19.25   0
  -6   5  -8   21.52   15.95   0
   6   5  -8   87.10   13.04   0
  -6  -5   8   90.48   13.33   0
   6  -5  -8   83.34   13.70   0
  -7  -5   8   37.22   12.39   0
  -7   5  -8   27.67   15.85   0
   7  -5  -8   44.72   13.08   0
   7   5  -8   45.39   11.83   0
  -7   5   8   37.35   19.10   0
  -8  -5   8  619.70   19.28   0
   8  -5  -8  632.83   22.38   0
   8   5  -8  590.92   19.18   0
  -8   5  -8  568.65   26.83   0
  -8   5   8  530.69   17.86   0
  -9   5  -8   20.17   16.49   0
   9   5  -8   22.71   12.06   0
  -9  -5   8   36.49   12.50   0
   9  -5  -8   17.39   12.71   0
  -9   5   8   12.06   13.52   0
  10  -5  -8  153.87   13.85   0
 -10   5  -8  166.81   19.97   0
 -10  -5   8  155.14   14.11   0
 -10   5   8  146.86   15.08   0
  10   5  -8  144.29   12.64   0
 -11  -5   8  129.45   12.84   0
 -11  -5  -8  128.67   13.12   0
 -11   5   8  135.23   14.36   0
  11  -5  -8  124.85   18.15   0
  11   5  -8  134.02   13.05   0
 -11   5  -8   94.45   14.16   0
 -12  -5  -8   -2.83   11.52   0
 -12   5  -8    1.50   16.67   0
 -12   5   8   12.57   12.18   0
 -12  -5   8   16.67   10.97   0
  12  -5  -8   -2.78   11.77   0
 -13  -5  -8   -0.55   10.64   0
 -13   5   8   -6.84   12.07   0
 -13   5  -8   -0.96   11.34   0
  13  -5  -8    2.44   11.81   0
 -13  -5   8   -5.85   10.28   0
 -14  -5   8   21.68   16.14   0
 -14  -5  -8    1.86   10.67   0
 -14   5  -8    7.84   16.65   0
 -14   5   8    6.89   11.46   0
 -15   5  -8   12.63   12.60   0
 -15   5   8   14.72   12.82   0
 -15  -5   8    3.69   11.97   0
 -15  -5  -8   11.71   11.38   0
 -16  -5  -8    3.94   16.21   0
 -16  -5   8   -7.65   10.94   0
 -16   5   8   10.84   12.31   0
 -16   5  -8    2.40   17.14   0
   0   6  -8  142.31   15.73   0
   0  -6   8   74.99   14.64   0
   1   6  -8   55.98   14.63   0
  -1   6  -8   54.27   13.87   0
   1  -6   8   53.90   15.01   0
  -1  -6   8   55.43   14.72   0
  -2  -6   8 3754.41   34.15   0
   2  -6   8 3727.29   43.96   0
   2   6  -8 3760.48   34.62   0
  -2   6  -8 3093.61   38.83   0
  -3  -6   8   84.62   15.29   0
  -3   6  -8  122.31   15.98   0
   3   6  -8  106.80   15.32   0
   3  -6   8  103.54   17.01   0
   4  -6  -8   27.61   17.35   0
  -4   6  -8   31.01   15.36   0
  -4  -6   8   27.64   15.29   0
   4   6  -8   53.20   14.76   0
  -5   6  -8  253.47   21.25   0
   5  -6  -8  307.44   17.91   0
  -5  -6   8  351.97   21.00   0
   5   6  -8  314.91   15.49   0
   6   6  -8  223.02   13.26   0
  -6  -6   8  235.89   13.58   0
   6  -6  -8  232.11   15.42   0
  -6   6  -8  200.01   20.41   0
   7  -6  -8   99.91   14.22   0
   7   6  -8  124.35   17.45   0
  -7  -6   8   97.45   12.98   0
  -7   6  -8  110.72   22.44   0
   8   6  -8   67.75   12.10   0
  -8   6  -8   56.48   19.92   0
  -8  -6   8   56.24   12.27   0
   8  -6  -8   54.53   12.52   0
  -8   6  -8   35.59   13.20   0
  -9  -6   8  101.90   12.79   0
   9   6  -8  129.77   12.27   0
   9  -6  -8  107.65   13.54   0
  -9   6  -8   46.41   13.94   0
  -9   6   8   90.47   13.74   0
  -9   6  -8   91.57   22.57   0
 -10   6  -8   37.10   15.61   0
 -10   6   8   25.20   14.41   0
 -10  -6   8   35.86   12.32   0
 -10   6  -8   30.01   14.01   0
  10   6  -8   50.61   12.12   0
  10  -6  -8   47.31   12.67   0
 -11   6  -8  171.58   22.13   0
 -11   6   8  132.55   15.10   0
  11  -6  -8  159.84   14.30   0
 -11  -6  -8  144.61   12.86   0
 -11  -6   8  178.71   13.06   0
  12  -6  -8   -0.32   11.91   0
 -12   6  -8    0.88   11.63   0
 -12   6   8    1.10   13.14   0
 -12  -6  -8  -11.21   11.13   0
 -12  -6   8   -6.99   11.63   0
 -13  -6  -8   67.60   12.34   0
  13  -6  -8   77.99   12.62   0
 -13   6   8   76.02   13.76   0
 -13  -6   8  103.91   11.94   0
 -13   6  -8   32.88   14.08   0
 -14   6   8    7.16   12.81   0
 -14  -6  -8   22.99   11.50   0
 -14   6  -8   -0.90   12.12   0
 -14  -6   8  -12.56   11.28   0
 -15  -6  -8   47.73   16.61   0
 -15  -6   8   10.04   11.87   0
 -15   6   8   25.66   13.25   0
 -15   6  -8    7.59   13.41   0
 -16   6   8   -2.96   13.41   0
 -16   6  -8    0.24   12.99   0
 -16  -6  -8   -5.09   12.15   0
 -16  -6   8   -7.14   11.38   0
  -1   7  -8  398.75   18.15   0
  -1  -7   8  374.23   17.89   0
   1   7  -8  408.93   18.08   0
   1  -7   8  404.22   18.72   0
  -2   7  -8   30.25   14.33   0
   2  -7   8   18.08   21.41   0
   2   7  -8   21.81   14.66   0
  -2  -7   8   19.77   14.90   0
  -3   7  -8   18.37   14.33   0
   3  -7   8   22.38   15.15   0
  -3  -7   8   19.60   14.53   0
   3   7  -8   13.83   14.00   0
  -4   7  -8  154.11   22.69   0
   4  -7  -8  161.63   17.91   0
   4   7  -8  143.27   14.19   0
  -4  -7   8  149.40   14.74   0
   5  -7  -8  526.00   19.43   0
   5   7  -8  524.64   16.06   0
  -5  -7   8  548.40   20.21   0
  -5   7  -8  414.09   23.62   0
   6   7  -8   -1.89   11.41   0
  -6   7  -8    1.81   12.34   0
   6  -7  -8    1.79   12.90   0
  -6  -7   8   -5.53   11.41   0
  -7  -7   8  216.54   12.94   0
   7   7  -8  227.26   13.29   0
   7  -7  -8  245.30   15.08   0
   8  -7  -8  140.20   13.35   0
   8   7  -8  148.39   12.97   0
  -8  -7   8  145.76   12.67   0
   9  -7  -8    7.85   12.06   0
   9   7  -8    3.46   12.07   0
  -9  -7   8   19.20   12.26   0
 -10  -7   8   14.17   11.68   0
  10  -7  -8    1.64   11.55   0
  11  -7  -8   -0.76   12.10   0
 -11  -7   8   10.12   11.57   0
 -11  -7  -8    6.30   11.60   0
 -12  -7   8   32.71   11.66   0
 -12  -7  -8   21.88   11.87   0
  12  -7  -8   14.50   12.47   0
 -13  -7  -8    4.69   11.37   0
 -13  -7   8    6.31   10.95   0
 -14  -7  -8   22.67   11.80   0
 -14  -7   8   20.27   11.73   0
 -15  -7  -8   -1.86   11.00   0
 -15  -7   8    1.71   11.82   0
 -16  -7   8   14.27   11.91   0
 -16  -7  -8   -7.18   11.82   0
   0  -8   8  281.43   17.71   0
   0   8  -8  268.83   16.92   0
   1  -8   8    9.98   15.44   0
  -1  -8   8   11.38   15.34   0
  -1   8  -8    4.75   14.89   0
   1   8  -8    4.96   14.14   0
   2   8  -8  691.81   18.40   0
  -2   8  -8  648.49   21.92   0
  -2  -8   8  653.16   19.87   0
   2  -8   8  692.94   22.74   0
   3   8  -8   74.51   14.34   0
  -3  -8   8   76.58   14.06   0
   3  -8   8   70.06   15.92   0
  -3   8  -8   54.28   13.96   0
   4  -8   8    5.69   15.26   0
  -4   8  -8    9.85   13.14   0
  -4  -8   8    7.86   12.84   0
   4   8  -8   -5.91   12.55   0
   5  -8  -8   29.84   14.44   0
  -5  -8   8   25.97   12.63   0
  -5   8  -8   15.15   13.66   0
   5   8  -8   21.35   12.35   0
  -6  -8   8   22.81   11.73   0
   6  -8  -8   23.66   13.05   0
   6   8  -8   42.29   11.64   0
   7   8  -8  112.36   11.40   0
  -7  -8   8  101.16   11.71   0
   7  -8  -8   97.05   14.06   0
   8  -8  -8    4.38   12.45   0
  -8  -8   8   -8.47   11.85   0
   8   8  -8   -8.96   11.54   0
   9  -8  -8   39.02   12.58   0
  -9  -8   8   49.12   17.03   0
  10  -8  -8   91.67   13.91   0
 -10  -8   8   77.38   12.15   0
  11  -8  -8   86.94   12.96   0
 -11  -8  -8   71.56   11.46   0
 -11  -8   8   70.01   12.11   0
 -12  -8   8   -5.54   11.77   0
  12  -8  -8   -8.11   11.51   0
 -12  -8  -8   17.18   12.15   0
 -13  -8  -8   30.98   11.82   0
 -13  -8   8   45.39   11.81   0
  13  -8  -8   21.38   12.41   0
 -14  -8   8   -7.00   11.09   0
 -14  -8  -8   19.02   15.38   0
 -15  -8  -8   23.15   11.43   0
 -15  -8   8   30.19   11.58   0
 -16  -8   8    4.56   11.19   0
 -16  -8  -8   15.06   16.41   0
  -1  -9   8  248.06   16.33   0
   1  -9   8  251.87   16.11   0
   1   9  -8  259.83   21.06   0
  -1   9  -8  239.26   15.47   0
   2  -9   8    7.93   13.14   0
  -2  -9   8    1.12   14.45   0
   2   9  -8    8.42   13.59   0
  -2   9  -8    3.07   12.36   0
  -3   9  -8   65.90   14.03   0
  -3  -9   8   78.96   13.98   0
   3  -9   8   78.16   14.41   0
   3   9  -8   80.53   13.14   0
  -4   9  -8   33.58   13.85   0
   4   9  -8   44.00   12.62   0
   4  -9   8   44.84   14.24   0
  -4  -9   8   44.56   12.83   0
   5  -9  -8   95.80   14.35   0
  -5  -9   8   98.17   12.65   0
   5   9  -8   81.72   12.16   0
   6  -9  -8   86.24   14.03   0
  -6  -9   8   75.13   12.44   0
   6   9  -8   90.73   11.88   0
   7   9  -8    4.01   10.86   0
  -7  -9   8    7.20   11.36   0
   7  -9  -8   17.14   17.86   0
   8  -9  -8   91.08   13.14   0
  -8  -9   8   78.34   12.07   0
  -9  -9   8   11.37   11.45   0
   9  -9  -8   14.66   12.95   0
 -10  -9   8    2.28   11.47   0
  10  -9  -8   -4.33   12.67   0
  11  -9  -8   32.12   16.90   0
 -11  -9  -8   34.51   11.52   0
 -11  -9   8   33.25   11.91   0
 -12  -9  -8   99.10   11.95   0
  12  -9  -8   90.95   13.00   0
  13  -9  -8    9.86   12.67   0
 -13  -9  -8   17.31   11.53   0
 -13  -9   8   38.49   11.97   0
 -14  -9   8   33.04   11.50   0
 -14  -9  -8   -4.92   16.34   0
 -15  -9   8   -2.31   11.84   0
 -15  -9  -8   21.96   11.00   0
   0  10  -8    6.92   12.78   0
   0 -10   8   13.49   12.75   0
   1  10  -8  127.03   13.55   0
  -1  10  -8  143.01   12.93   0
   1 -10   8  112.01   12.85   0
  -1 -10   8  130.59   14.42   0
   2  10  -8   33.22   12.05   0
   2 -10   8   31.20   12.33   0
  -2 -10   8   30.53   13.03   0
  -2  10  -8   32.28   11.97   0
  -3 -10   8   40.84   12.46   0
   3 -10   8   39.41   12.72   0
   3  10  -8   37.14   11.85   0
  -4 -10   8   -5.00   12.32   0
   4 -10   8    4.73   13.63   0
   4  10  -8    6.33   12.28   0
   5 -10   8    2.05   13.24   0
   5 -10  -8   -5.27   18.63   0
  -5 -10   8   30.43   12.40   0
   5  10  -8   -6.48   11.39   0
   6 -10  -8    6.21   18.19   0
  -6 -10   8   18.68   11.69   0
   7 -10  -8   48.87   13.63   0
  -7 -10   8   61.45   11.77   0
  -8 -10   8   10.43   11.41   0
   8 -10  -8    0.40   12.02   0
   9 -10  -8   12.57   12.83   0
  -9 -10   8   -1.68   11.42   0
  10 -10  -8    6.73   11.83   0
 -10 -10   8   10.55   12.03   0
  11 -10  -8   -3.57   11.08   0
 -11 -10  -8   22.92   12.31   0
  12 -10  -8    3.65   17.70   0
 -12 -10   8   11.79   11.63   0
 -12 -10  -8   17.67   11.66   0
 -13 -10  -8   -5.14   11.49   0
  13 -10  -8    5.00   11.35   0
 -13 -10   8    6.31   11.12   0
 -14 -10  -8   -3.29   16.68   0
 -14 -10   8  -16.14   16.68   0
 -15 -10  -8   -6.20   12.25   0
 -15 -10   8    2.95   11.84   0
   1 -11   8  323.08   15.65   0
  -1 -11   8  343.49   15.42   0
  -2 -11   8   20.12   12.29   0
   2 -11   8    6.50   11.92   0
   3 -11   8  602.29   19.56   0
  -3 -11   8  641.48   16.25   0
   4 -11   8   90.07   14.59   0
  -4 -11   8  179.33   13.12   0
   5 -11   8   37.37   13.43   0
  -5 -11   8   57.64   12.42   0
   6 -11  -8  108.68   14.27   0
  -6 -11   8  123.47   12.68   0
   7 -11  -8   53.43   12.92   0
  -7 -11   8   48.04   11.82   0
  -8 -11   8   81.75   11.88   0
   8 -11  -8   92.18   19.59   0
  -9 -11   8   71.84   12.38   0
   9 -11  -8   69.58   13.08   0
  10 -11  -8   60.60   13.42   0
 -10 -11   8   67.82   12.19   0
 -11 -11  -8   65.83   17.43   0
 -11 -11   8   82.09   11.88   0
  11 -11  -8   39.75   12.33   0
  12 -11  -8   18.50   12.50   0
 -12 -11   8   20.29   11.23   0
 -12 -11  -8   13.38   11.30   0
 -13 -11  -8   -0.86   11.63   0
  13 -11  -8    3.91   12.04   0
 -14 -11  -8   -5.82   11.15   0
 -14 -11   8   14.50   11.83   0
 -15 -11  -8    8.42   12.05   0
 -15 -11   8   18.67   12.07   0
   0 -12   8  158.06   13.25   0
  -1 -12   8  185.24   13.16   0
   1 -12   8  197.28   13.85   0
   2 -12   8   75.32   12.92   0
  -2 -12   8   84.17   12.42   0
   3 -12   8   95.78   13.80   0
  -3 -12   8  108.43   12.34   0
   4 -12   8   12.56   17.58   0
  -4 -12   8   20.20   12.20   0
   5 -12   8  211.94   17.63   0
  -5 -12   8  245.49   13.63   0
   6 -12  -8   31.59   17.28   0
  -6 -12   8   31.49   12.08   0
   7 -12  -8   30.33   13.12   0
  -7 -12   8   35.46   11.38   0
  -8 -12   8   10.08   11.10   0
   8 -12  -8    0.41   12.52   0
   9 -12  -8   10.97   13.44   0
  -9 -12   8   13.03   11.25   0
  10 -12  -8   32.29   16.47   0
 -11 -12  -8  -10.57   11.72   0
 -11 -12   8    6.02   10.87   0
  11 -12  -8    5.15   11.78   0
 -12 -12  -8   10.72   11.79   0
  12 -12  -8    2.89   16.90   0
 -13 -12  -8    1.61   12.24   0
 -13 -12   8    8.03   11.34   0
  13 -12  -8    6.23   12.05   0
 -14 -12   8    8.56   11.72   0
 -14 -12  -8    9.93   11.61   0
   1 -13   8   59.92   13.45   0
  -1 -13   8   66.12   12.19   0
   2 -13   8    7.41   12.14   0
  -2 -13   8    2.32   11.15   0
   3 -13   8  210.73   14.57   0
  -3 -13   8  192.84   14.41   0
  -4 -13   8    9.02   11.78   0
   4 -13   8   18.51   12.29   0
   5 -13   8  353.16   19.84   0
  -5 -13   8  399.26   14.52   0
   6 -13  -8  115.65   14.43   0
  -6 -13   8  108.45   12.22   0
   7 -13  -8   16.14   13.58   0
  -7 -13   8   15.50   11.47   0
   8 -13  -8    8.88   12.15   0
  -8 -13   8   15.94   12.19   0
   9 -13  -8   20.03   17.39   0
  -9 -13   8   11.50   10.97   0
 -10 -13  -8   48.55   11.86   0
  10 -13  -8   45.76   17.16   0
 -10 -13   8   42.56   11.42   0
 -11 -13  -8   21.34   11.63   0
 -11 -13   8   15.12   10.69   0
  11 -13  -8    5.90   16.71   0
 -12 -13  -8   13.10   11.81   0
  12 -13  -8   31.36   13.61   0
 -13 -13   8   12.46   11.97   0
 -13 -13  -8   -3.79   11.90   0
 -14 -13  -8   23.54   11.88   0
   0 -14   8   -1.14   12.49   0
   1 -14   8   43.67   12.17   0
  -1 -14   8   21.65   12.50   0
   2 -14   8    5.65   11.97   0
  -2 -14   8  -10.60   11.67   0
   3 -14   8   15.03   11.62   0
  -3 -14   8    5.69   12.79   0
   4 -14   8   19.03   12.87   0
  -4 -14   8   15.99   12.57   0
   5 -14   8    0.64   13.44   0
  -5 -14   8  -19.54   12.44   0
   6 -14   8    7.80   13.29   0
   6 -14  -8   13.99   13.66   0
  -6 -14   8   22.84   11.72   0
   7 -14  -8   -5.27   13.35   0
  -7 -14   8    5.50   11.92   0
   8 -14  -8   96.67   18.39   0
  -8 -14   8   75.24   12.09   0
   9 -14  -8    2.67   11.68   0
  -9 -14   8    5.28   11.22   0
  10 -14  -8    4.45   12.21   0
 -10 -14  -8  -11.82   10.79   0
 -10 -14   8   -0.06   10.72   0
 -11 -14  -8    9.44   12.25   0
 -11 -14   8   -6.30   11.53   0
  11 -14  -8    7.37   11.68   0
 -12 -14  -8    8.73   11.77   0
  12 -14  -8   -0.30   12.60   0
 -12 -14   8   -0.07   11.72   0
 -13 -14  -8   11.95   12.19   0
 -13 -14   8   17.86   11.36   0
   1 -15   8    7.49   12.31   0
  -1 -15   8   18.80   11.51   0
   2 -15   8  149.28   17.97   0
  -2 -15   8  130.08   12.57   0
   3 -15   8   50.55   12.47   0
  -3 -15   8   50.76   12.73   0
   4 -15   8   39.22   12.87   0
  -4 -15   8   65.46   12.13   0
   5 -15   8  195.11   16.62   0
  -5 -15   8  207.54   13.25   0
   6 -15   8    9.79   17.63   0
  -6 -15   8  -16.37   11.68   0
   7 -15  -8   61.00   13.33   0
  -7 -15   8   78.19   11.92   0
  -8 -15   8    8.90   11.51   0
   8 -15  -8    5.93   17.51   0
  -9 -15   8    3.54   11.04   0
   9 -15  -8    4.73   17.32   0
 -10 -15  -8   94.96   12.13   0
  10 -15  -8   77.92   14.65   0
 -10 -15   8   94.09   11.86   0
  11 -15  -8    2.83   12.50   0
 -11 -15  -8   -7.32   11.56   0
 -12 -15  -8   50.84   12.50   0
 -12 -15   8   67.57   12.07   0
  12 -15  -8   31.36   16.56   0
 -13 -15   8   12.95   11.43   0
 -13 -15  -8   -4.29   11.88   0
   0 -16   8  408.20   15.76   0
  -1 -16   8   16.63   12.29   0
   1 -16   8   23.60   12.04   0
  -2 -16   8    9.52   12.27   0
   2 -16   8    4.43   12.14   0
   3 -16   8  107.41   17.86   0
  -3 -16   8   97.91   12.53   0
   4 -16   8   48.84   18.18   0
  -4 -16   8   48.06   11.27   0
   5 -16   8   -2.12   12.08   0
  -5 -16   8   -4.98   11.98   0
   6 -16   8   32.79   14.00   0
  -6 -16   8   58.98   12.13   0
  -7 -16   8    6.34   11.27   0
   7 -16  -8   18.02   17.26   0
   8 -16  -8   -1.10   12.50   0
   9 -16  -8    4.01   16.06   0
  -9 -16   8   19.35   11.97   0
  -9 -16  -8   11.08   11.08   0
 -10 -16  -8    8.32   11.37   0
 -10 -16   8    6.96   10.96   0
  10 -16  -8    0.85   12.09   0
 -11 -16  -8    6.48   11.58   0
  11 -16  -8    7.73   12.97   0
 -12 -16  -8   10.70   12.33   0
 -12 -16   8    4.01   11.11   0
   1 -17   8   20.61   12.33   0
  -1 -17   8   20.34   12.07   0
   2 -17   8  331.96   15.90   0
  -2 -17   8  159.27   13.89   0
   3 -17   8  205.92   14.66   0
  -3 -17   8  180.49   13.05   0
   4 -17   8   -0.90   12.08   0
  -4 -17   8   16.01   12.01   0
   5 -17   8    2.65   12.49   0
  -5 -17   8    7.03   12.10   0
   6 -17   8   -0.48   12.77   0
  -6 -17   8  -11.54   11.57   0
  -7 -17   8    6.05   10.94   0
   7 -17  -8    4.25   12.23   0
   8 -17  -8    5.60   12.15   0
  -8 -17  -8    9.62   11.64   0
  -9 -17  -8   -4.36   11.01   0
  -9 -17   8   16.40   11.30   0
   9 -17  -8    2.57   11.76   0
  10 -17  -8   16.98   13.20   0
 -10 -17  -8   16.98   11.69   0
 -10 -17   8    9.07   11.78   0
 -11 -17  -8   13.59   12.21   0
  11 -17  -8    0.14   12.22   0
   0 -18   8   48.33   12.67   0
   1 -18   8   18.91   12.17   0
  -1 -18   8   16.80   11.51   0
   2 -18   8   15.53   12.47   0
  -2 -18   8   21.53   12.44   0
   3 -18   8   55.28   12.73   0
  -3 -18   8   43.39   11.16   0
  -4 -18   8    6.87   12.16   0
   4 -18   8    7.89   11.82   0
   5 -18   8   -3.64   12.16   0
  -5 -18   8  -11.91   11.46   0
  -6 -18   8   22.08   11.34   0
   6 -18   8   20.44   12.94   0
  -7 -18   8    6.44   11.73   0
   7 -18  -8   -2.49   13.57   0
   8 -18  -8    9.45   12.36   0
  -8 -18   8   -3.48   12.09   0
  -8 -18  -8   -1.60   11.08   0
  -9 -18  -8   -3.68   11.35   0
   9 -18  -8    3.45   12.80   0
  -9 -18   8    3.78   11.35   0
  10 -18  -8    2.67   18.02   0
 -10 -18  -8   -4.66   11.92   0
   1 -19   8  164.42   13.64   0
  -1 -19   8  153.56   13.24   0
   2 -19   8   23.78   16.68   0
  -2 -19   8   28.95   11.92   0
   3 -19   8   25.88   12.39   0
  -3 -19   8   18.22   12.02   0
   4 -19   8   17.30   12.73   0
  -4 -19   8    2.57   11.75   0
  -5 -19   8   16.08   11.46   0
   5 -19   8    7.57   16.78   0
   6 -19   8   -0.14   11.91   0
   7 -19  -8   25.77   13.44   0
  -7 -19  -8   27.62   12.57   0
   8 -19  -8   21.71   13.17   0
  -8 -19   8   33.68   11.95   0
  -8 -19  -8   27.27   11.35   0
  -9 -19   8    3.37   12.22   0
  -9 -19  -8    8.95   12.11   0
   9 -19  -8   10.18   12.32   0
 -10 -19  -8  -11.11   12.06   0
  10 -19  -8    7.35   18.79   0
  10 -19  -8    5.67   13.51   0
   0 -20   8   30.95   12.72   0
  -1 -20   8    9.59   11.87   0
   1 -20   8   10.00   12.52   0
  -2 -20   8   -8.45   11.64   0
   2 -20   8   18.43   11.40   0
   3 -20   8   37.41   17.37   0
  -3 -20   8   27.48   11.54   0
   4 -20   8   18.42   12.70   0
  -4 -20   8    7.07   11.59   0
  -5 -20   8    9.02   11.92   0
   5 -20   8   18.90   17.59   0
  -6 -20  -8    6.49   11.52   0
   6 -20   8   -0.05   12.67   0
  -6 -20   8    2.95   12.05   0
  -7 -20  -8    8.67   12.29   0
   7 -20  -8    2.85   18.48   0
  -7 -20   8   11.75   11.24   0
  -8 -20  -8   -8.70   11.82   0
   8 -20  -8    2.72   19.17   0
  -8 -20   8   -6.98   12.27   0
  -1 -21   8   67.64   13.30   0
   1 -21   8   71.16   12.87   0
   2 -21   8   10.53   11.91   0
  -2 -21   8   -7.03   16.75   0
   3 -21   8   68.52   14.02   0
  -3 -21   8   58.12   12.51   0
   4 -21   8   -5.49   12.67   0
  -4 -21   8    1.94   12.05   0
   5 -21   8   -2.70   18.67   0
  -5 -21   8   26.22   12.35   0
  -5 -21  -8   24.01   11.32   0
   6 -21   8    1.72   17.81   0
  -6 -21  -8    2.67   11.07   0
  -6 -21   8  -12.04   11.37   0
  -7 -21  -8   -5.62   12.09   0
   7 -21  -8    6.28   18.88   0
  -7 -21   8    5.39   12.50   0
   0 -22   8    4.33   11.85   0
  -1 -22   8    6.98   11.68   0
   1 -22   8   -8.35   11.66   0
  -2 -22   8    2.41   11.15   0
   2 -22   8   -4.97   12.74   0
  -3 -22  -8   10.26   11.73   0
   3 -22   8    3.55   12.47   0
   4 -22   8    7.47   12.51   0
  -4 -22  -8    3.75   12.05   0
  -4 -22   8   -2.29   12.26   0
  -5 -22  -8   39.32   12.69   0
  -5 -22   8   33.03   12.64   0
   5 -22   8   17.31   13.62   0
   1 -23   8    5.59   18.03   0
  -1 -23   8   10.78   12.43   0
  -1 -23  -8   22.90   12.26   0
   2 -23   8   11.15   12.61   0
  -2 -23   8   15.58   11.51   0
  -2 -23  -8   18.87   11.53   0
  -3 -23  -8   -0.16   12.68   0
  -3 -23   8    1.77   12.65   0
   3 -23  -8    3.69   12.02   0
   3 -23   8   23.90   18.43   0
  -1  -1   9  109.33   16.50   0
  -1   1  -9   98.77   18.43   0
   1  -1  -9   85.94   16.84   0
   1   1  -9  103.04   17.33   0
   2  -1  -9    6.40   15.55   0
   2   1  -9   -1.67   15.16   0
  -2  -1   9    3.80   15.13   0
  -2   1   9   18.72   16.33   0
   3  -1  -9   67.26   15.88   0
  -3  -1   9   71.24   15.77   0
  -3   1   9   86.32   15.52   0
   3   1  -9   85.48   14.71   0
  -4   1   9  102.89   16.37   0
   4   1  -9  114.51   15.08   0
  -4  -1   9  109.16   15.56   0
   4  -1  -9  115.52   16.06   0
  -5  -1   9  -12.17   15.36   0
   5  -1  -9    9.91   14.98   0
  -5   1   9    4.49   15.28   0
   5   1  -9   25.81   14.71   0
   6  -1  -9  309.03   17.01   0
   6   1  -9  299.54   16.22   0
  -6   1   9  280.74   16.79   0
  -6  -1   9  292.17   16.49   0
  -7  -1   9   99.68   14.51   0
  -7   1   9  111.01   20.57   0
   7  -1  -9   91.57   13.85   0
   7   1  -9  113.25   13.65   0
   8   1  -9  324.52   14.52   0
  -8  -1   9  335.86   19.54   0
  -8   1   9  298.41   15.08   0
   8  -1  -9  305.52   14.39   0
  -9  -1   9   57.53   11.65   0
   9   1  -9   37.75   12.44   0
   9  -1  -9   56.40   12.30   0
  -9   1   9   71.06   12.71   0
 -10  -1   9  307.78   14.32   0
  10   1  -9  309.59   14.14   0
  10  -1  -9  305.27   14.64   0
 -10   1   9  333.51   15.63   0
 -11   1   9    2.99   12.60   0
 -11  -1   9   -8.16   11.63   0
  11   1  -9   14.26   11.28   0
 -11   1  -9    5.45   10.93   0
 -11  -1  -9    4.41   11.23   0
  11  -1  -9    6.22   11.97   0
 -12   1   9  296.93   14.49   0
 -12  -1   9  293.78   14.92   0
 -12   1  -9  275.22   14.77   0
 -12  -1  -9  273.72   14.43   0
  12  -1  -9  314.56   17.73   0
  12   1  -9  292.67   14.48   0
 -13   1  -9   11.70   11.74   0
  13  -1  -9    9.58   11.08   0
 -13  -1  -9   15.75   10.70   0
 -13   1   9    4.81   11.35   0
  13   1  -9    9.67   16.36   0
 -13  -1   9   15.14   11.77   0
 -14  -1  -9  115.92   13.01   0
  14  -1  -9  131.99   13.15   0
 -14   1  -9  102.73   12.63   0
 -14  -1   9  119.04   13.15   0
 -14   1   9  137.30   13.74   0
 -15   1  -9    8.54   11.62   0
 -15  -1  -9   11.02   15.70   0
 -15   1   9   14.17   16.52   0
 -15  -1   9  -12.73   16.40   0
 -16  -1   9   19.02   11.81   0
 -16  -1  -9   16.35   12.35   0
 -16   1   9   17.90   12.62   0
 -16   1  -9   16.97   12.10   0
   0   2  -9   58.48   16.88   0
   0  -2   9   57.15   17.09   0
  -1   2  -9   37.30   16.50   0
  -1  -2   9   34.03   16.19   0
   1   2  -9   29.61   15.75   0
   1  -2   9   27.31   16.96   0
   1  -2  -9   46.59   17.10   0
  -2  -2   9   49.27   15.54   0
   2   2  -9   56.10   15.58   0
  -2   2  -9   61.52   23.51   0
   2  -2  -9   81.58   23.39   0
  -3   2   9   -3.42   15.26   0
   3   2  -9    6.75   14.10   0
   3  -2  -9   22.62   14.89   0
  -3  -2   9    1.05   14.61   0
   4   2  -9    3.86   14.04   0
  -4   2   9    5.04   15.24   0
   4  -2  -9   -8.55   15.39   0
  -4  -2   9   -5.34   14.52   0
   5  -2  -9   37.05   15.69   0
  -5   2   9   45.02   16.42   0
   5   2  -9   35.96   15.14   0
  -5  -2   9   40.16   15.40   0
  -6  -2   9  235.68   21.20   0
   6  -2  -9  204.34   16.75   0
  -6   2   9  108.38   16.59   0
   6   2  -9  231.34   15.86   0
   7   2  -9  280.99   15.05   0
  -7  -2   9  280.59   15.36   0
   7  -2  -9  307.52   15.45   0
  -7   2   9  290.52   16.11   0
  -8  -2   9  563.33   16.10   0
  -8   2   9  575.31   17.16   0
   8   2  -9  561.33   15.59   0
   8  -2  -9  571.40   16.82   0
   9  -2  -9   62.50   11.96   0
  -9  -2   9   80.13   12.37   0
  -9   2   9   62.88   13.96   0
   9   2  -9   82.26   16.34   0
  10   2  -9   20.16   11.46   0
  10  -2  -9   28.57   12.68   0
 -10   2   9   15.01   13.37   0
 -10  -2   9    6.00   11.09   0
 -11   2  -9   21.56   11.13   0
 -11  -2   9   43.38   12.03   0
 -11   2   9   32.14   12.55   0
  11   2  -9   30.88   11.94   0
  11  -2  -9   36.12   12.13   0
 -12  -2   9   14.97   11.92   0
  12  -2  -9   20.63   12.23   0
 -12  -2  -9    7.71   11.18   0
 -12   2  -9   10.46   11.89   0
 -12   2   9    6.92   11.88   0
  12   2  -9   17.54   16.76   0
 -13  -2   9   -0.50   11.22   0
  13  -2  -9   22.33   10.59   0
 -13   2  -9   21.08   11.91   0
 -13   2   9   22.29   12.24   0
  13   2  -9    3.00   10.79   0
 -13  -2  -9   18.00   11.07   0
 -14  -2   9   18.05   16.42   0
 -14  -2  -9    3.47   11.79   0
 -14   2  -9   -1.65   11.46   0
 -14   2   9   -3.10   12.49   0
  14  -2  -9    6.55   11.42   0
 -15   2   9   -3.84   12.26   0
 -15  -2   9   12.58   11.03   0
 -15   2  -9   10.25   17.24   0
 -15  -2  -9    9.62   11.37   0
 -16  -2  -9   -4.33   11.04   0
 -16  -2   9   15.48   12.38   0
 -16   2   9   19.75   12.17   0
 -16   2  -9   -0.51   11.80   0
   1   3  -9  427.95   19.23   0
  -1  -3   9  672.52   21.45   0
   1  -3   9  785.90   23.71   0
  -1   3  -9  840.93   23.50   0
   2  -3  -9  138.19   18.23   0
   2   3  -9  131.86   15.78   0
  -2   3  -9  133.70   17.10   0
  -2  -3   9  132.91   15.97   0
   3   3  -9  346.39   16.84   0
  -3   3  -9  325.88   25.02   0
   3  -3  -9  346.98   19.20   0
  -3  -3   9  338.26   17.06   0
  -4   3  -9  115.16   18.43   0
   4  -3  -9  109.11   16.05   0
   4   3  -9  124.52   15.58   0
  -4  -3   9  113.45   15.73   0
  -4   3   9  118.80   17.99   0
  -5   3   9  307.89   18.39   0
  -5  -3   9  320.91   16.89   0
   5  -3  -9  320.11   18.13   0
   5   3  -9  298.06   16.63   0
   6   3  -9  250.33   15.89   0
   6  -3  -9  231.60   16.23   0
  -6  -3   9  268.25   16.12   0
  -6   3   9  247.88   17.43   0
   7   3  -9  135.95   13.38   0
  -7  -3   9  128.88   13.60   0
  -7   3   9  121.99   13.97   0
   7  -3  -9  129.50   13.78   0
   8   3  -9  163.15   12.56   0
  -8  -3   9  168.29   12.90   0
  -8   3   9  160.50   14.24   0
   8  -3  -9  157.33   18.17   0
   9   3  -9   38.59   11.33   0
  -9  -3   9   47.02   12.37   0
  -9   3   9   23.87   13.71   0
   9  -3  -9   40.75   11.90   0
 -10  -3   9  216.80   17.99   0
 -10   3   9  218.47   15.09   0
  10   3  -9  220.31   12.67   0
  10  -3  -9  215.48   14.60   0
 -10   3  -9  196.71   14.44   0
  11   3  -9    1.15   11.54   0
 -11  -3   9   20.03   11.19   0
 -11   3  -9   10.54   11.21   0
 -11   3   9   19.02   17.75   0
  11  -3  -9    6.87   11.75   0
  12  -3  -9  397.71   15.73   0
  12   3  -9  383.03   14.76   0
 -12  -3   9  375.21   14.80   0
 -12  -3  -9  369.29   15.26   0
 -12   3   9  323.47   15.06   0
 -12   3  -9  365.96   16.92   0
 -13  -3  -9    5.18   10.58   0
 -13   3   9   -2.67   11.54   0
 -13  -3   9   12.55   11.58   0
 -13   3  -9    6.21   11.06   0
  13  -3  -9    1.11   11.02   0
 -14   3  -9   62.89   12.67   0
 -14  -3   9   66.80   12.49   0
  14  -3  -9   72.02   17.33   0
 -14  -3  -9   64.22   13.19   0
 -14   3   9   63.72   12.77   0
 -15   3  -9    6.42   11.51   0
 -15  -3   9   -0.51   11.81   0
 -15   3   9   -9.40   12.07   0
 -15  -3  -9    2.72   11.73   0
 -16   3  -9   28.07   12.21   0
 -16  -3  -9   27.00   11.83   0
 -16  -3   9   26.64   12.30   0
 -16   3   9   -7.14   12.75   0
   0   4  -9   21.54   14.08   0
   0  -4   9   18.77   14.67   0
  -1   4  -9 2232.11   35.74   0
  -1  -4   9 2223.17   29.67   0
   1  -4   9 2157.60   32.87   0
   1   4  -9 2257.65   29.98   0
  -2  -4   9  141.74   15.38   0
   2  -4   9  148.97   17.21   0
   2   4  -9  161.09   15.34   0
  -2   4  -9  154.88   17.16   0
  -3  -4   9    8.44   14.62   0
   3   4  -9  -15.09   13.68   0
  -3   4  -9   -4.85   15.30   0
   3  -4  -9   10.36   16.06   0
  -4   4  -9  460.09   22.49   0
   4  -4  -9  456.88   20.15   0
  -4  -4   9  487.72   23.67   0
   4   4  -9  475.87   22.73   0
   5   4  -9   26.29   13.71   0
   5  -4  -9   17.33   16.03   0
  -5   4   9   30.57   16.73   0
  -5   4  -9   14.29   15.71   0
  -5  -4   9   42.04   14.58   0
  -6  -4   9   20.50   13.18   0
   6  -4  -9   10.32   14.16   0
  -6   4   9    6.49   15.19   0
   6   4  -9   -1.38   12.51   0
   7  -4  -9   23.77   12.78   0
   7   4  -9   10.70   11.86   0
  -7  -4   9    5.53   12.56   0
  -7   4   9   10.87   19.11   0
  -8   4   9    6.79   12.72   0
  -8  -4   9    9.30   11.74   0
   8  -4  -9    2.85   12.56   0
   8   4  -9    4.26   11.42   0
   9   4  -9   37.24   12.34   0
  -9  -4   9   42.92   11.98   0
   9  -4  -9   44.14   12.91   0
  -9   4   9   36.28   13.01   0
  10  -4  -9   24.24   12.31   0
 -10   4  -9   18.22   12.41   0
 -10  -4   9   23.25   11.89   0
 -10   4   9   30.06   18.85   0
  10   4  -9   29.49   11.88   0
 -11   4  -9   48.58   17.94   0
 -11  -4   9   48.40   12.73   0
  11  -4  -9   42.38   12.20   0
 -11   4   9   27.23   12.86   0
  11   4  -9   44.41   11.02   0
  12  -4  -9  161.50   17.70   0
 -12   4  -9  139.63   17.97   0
 -12   4   9  125.31   13.88   0
 -12  -4   9  130.23   12.77   0
 -12  -4  -9  134.05   13.02   0
  12   4  -9  163.75   11.80   0
 -13  -4  -9   -1.42   11.78   0
 -13  -4   9    5.66   10.99   0
 -13   4   9    7.19   12.18   0
  13  -4  -9    4.01   11.72   0
 -13   4  -9    3.18   10.92   0
 -14   4  -9   19.48   12.61   0
 -14  -4   9   38.13   11.46   0
  14  -4  -9   31.72   12.57   0
 -14   4   9   28.49   12.30   0
 -14  -4  -9   -0.03   10.96   0
 -15  -4  -9   11.01   11.23   0
 -15   4   9    8.31   16.89   0
 -15   4  -9    5.39   12.27   0
 -15  -4   9  -10.77   11.56   0
 -16   4  -9    7.27   12.16   0
 -16   4   9   16.12   12.64   0
 -16  -4   9   -3.85   11.80   0
 -16  -4  -9    8.19   12.05   0
  -1  -5   9  103.73   14.90   0
  -1   5  -9   95.37   15.12   0
   1   5  -9   99.76   14.81   0
   1  -5   9  114.62   16.08   0
  -2   5  -9   61.14   14.90   0
   2  -5   9   71.45   16.05   0
  -2  -5   9   81.44   15.37   0
   2   5  -9   81.34   15.33   0
  -3  -5   9   69.04   15.36   0
   3   5  -9   67.59   14.34   0
   3  -5  -9   99.69   24.84   0
  -3   5  -9   36.50   15.57   0
   4   5  -9    8.95   14.08   0
  -4  -5   9    3.92   15.28   0
   4  -5  -9   -1.74   17.38   0
  -4   5  -9    4.53   15.06   0
   5  -5  -9  647.51   20.67   0
  -5  -5   9  645.11   17.70   0
  -5   5  -9  658.72   29.94   0
   5   5  -9  632.45   17.71   0
  -6   5  -9  456.25   23.06   0
   6  -5  -9  819.44   20.40   0
  -6  -5   9  765.59   17.59   0
   6   5  -9  786.04   17.23   0
  -7   5  -9    5.92   20.65   0
  -7  -5   9    0.97   11.92   0
   7  -5  -9   -1.82   12.13   0
  -7   5   9    9.88   12.73   0
   7   5  -9   16.09   11.70   0
   8   5  -9  306.36   14.02   0
  -8  -5   9  310.61   13.70   0
  -8   5   9  261.02   15.48   0
   8  -5  -9  313.68   16.85   0
  -9  -5   9    8.10   11.60   0
  -9   5   9  -13.02   13.56   0
   9   5  -9   10.44   12.40   0
   9  -5  -9    8.76   12.29   0
  -9   5  -9   -0.36   11.19   0
 -10   5  -9   62.66   13.89   0
  10   5  -9   77.07   12.51   0
 -10  -5   9   70.04   12.35   0
 -10   5   9   53.45   18.22   0
  10  -5  -9   62.11   12.39   0
 -11  -5   9  192.91   12.80   0
  11  -5  -9  186.51   14.23   0
 -11   5  -9  159.51   15.39   0
 -11   5   9  168.19   15.05   0
  11   5  -9  176.17   13.17   0
 -12   5  -9  341.83   18.73   0
 -12   5   9  358.93   16.70   0
 -12  -5  -9  369.86   15.49   0
  12  -5  -9  397.73   16.18   0
 -12  -5   9  366.84   14.16   0
 -13   5   9    3.26   12.46   0
 -13  -5   9    8.15   12.00   0
  13  -5  -9    3.87   11.49   0
 -13   5  -9   -2.35   11.79   0
 -13  -5  -9   -3.88   15.40   0
 -14  -5   9   82.13   12.40   0
 -14   5   9   67.66   13.16   0
 -14   5  -9  106.38   18.78   0
 -14  -5  -9   95.18   12.43   0
  14  -5  -9   94.74   13.48   0
 -15  -5  -9   -1.32   11.51   0
 -15  -5   9    4.39   12.00   0
 -15   5  -9    8.56   11.93   0
 -15   5   9    3.75   12.62   0
 -16   5  -9   22.71   13.51   0
 -16  -5   9   20.34   12.47   0
 -16   5   9   29.45   17.79   0
 -16  -5  -9   23.15   12.32   0
   0  -6   9   27.70   14.87   0
   0   6  -9   32.03   14.17   0
  -1  -6   9   71.93   15.73   0
   1  -6   9   62.36   15.25   0
   1   6  -9   61.44   15.24   0
  -1   6  -9   56.94   14.82   0
  -2  -6   9  890.80   21.31   0
   2  -6   9 1018.96   25.21   0
   2   6  -9  996.19   21.74   0
  -2   6  -9  800.54   23.39   0
   3  -6   9  270.39   19.32   0
  -3   6  -9  166.77   16.79   0
  -3  -6   9  274.54   16.71   0
   3   6  -9  287.42   16.03   0
  -4   6  -9  219.92   18.37   0
  -4  -6   9  208.99   16.33   0
   4  -6  -9  220.44   19.23   0
   4   6  -9  238.67   20.83   0
  -5   6  -9    3.70   13.84   0
   5  -6  -9  -22.74   21.18   0
   5   6  -9   -1.58   12.41   0
  -5  -6   9    3.91   12.96   0
  -6  -6   9  191.10   13.68   0
   6  -6  -9  201.80   14.72   0
  -6   6  -9  166.59   18.04   0
   6   6  -9  187.36   13.45   0
   7  -6  -9  158.62   18.54   0
   7   6  -9  153.29   12.84   0
  -7   6  -9  156.55   22.66   0
  -7  -6   9  149.25   13.23   0
  -8   6  -9    5.31   13.09   0
  -8  -6   9   11.90   12.50   0
   8   6  -9   23.53   11.81   0
   8  -6  -9   -9.66   12.27   0
  -9   6  -9   57.57   13.77   0
   9   6  -9   96.12   12.37   0
   9  -6  -9  133.48   17.66   0
  -9   6  -9   41.10   14.67   0
  -9  -6   9  124.57   12.65   0
 -10  -6   9   77.51   13.16   0
  10   6  -9   90.55   12.86   0
 -10   6  -9   85.24   21.66   0
 -10   6   9   78.78   13.98   0
 -10   6  -9   57.17   14.17   0
  10  -6  -9   93.32   12.51   0
  11  -6  -9   15.57   11.94   0
 -11   6  -9    3.12   13.60   0
 -11   6   9   18.21   13.19   0
  11   6  -9   25.13   11.12   0
 -11  -6   9   31.39   11.45   0
 -11   6  -9    9.59   12.20   0
 -12  -6   9  -11.06   12.03   0
 -12  -6  -9    8.30   11.39   0
 -12   6   9   13.67   13.33   0
  12  -6  -9    8.24   11.67   0
 -12   6  -9    3.68   16.19   0
 -13   6  -9    6.04   12.22   0
 -13   6   9    5.51   12.72   0
 -13  -6   9   -1.36   11.11   0
  13  -6  -9   -6.10   11.42   0
 -13  -6  -9    3.01   12.15   0
 -14  -6   9   10.82   11.67   0
 -14   6   9  -12.85   18.25   0
  14  -6  -9    7.55   12.32   0
 -14  -6  -9    8.77   10.49   0
 -14   6  -9    0.94   16.55   0
 -15  -6   9   -4.74   11.64   0
 -15  -6  -9    6.42   11.68   0
 -15   6  -9    0.50   12.24   0
 -15   6   9    7.24   12.75   0
 -16   6   9   20.53   13.29   0
 -16  -6   9    5.19   12.39   0
 -16   6  -9   -2.73   13.67   0
 -16   6  -9    4.36   18.46   0
 -16  -6  -9   25.50   11.94   0
  -1   7  -9  104.36   15.61   0
   1   7  -9  100.98   15.37   0
   1  -7   9  102.66   16.32   0
  -1  -7   9  100.10   16.19   0
   2   7  -9   17.64   14.44   0
   2  -7   9   19.48   15.15   0
  -2  -7   9   17.76   14.94   0
  -2   7  -9   16.42   13.99   0
  -3  -7   9   29.14   14.87   0
   3   7  -9   28.97   13.53   0
   3  -7   9   24.19   16.07   0
  -3   7  -9   26.94   14.29   0
   4  -7  -9  312.34   17.66   0
  -4  -7   9  364.45   20.68   0
  -4   7  -9  347.11   20.05   0
   4   7  -9  348.87   15.59   0
  -5  -7   9   50.20   12.87   0
  -5   7  -9   36.74   14.21   0
   5   7  -9   30.15   11.50   0
   5  -7  -9   42.24   13.78   0
   6  -7  -9  161.43   14.42   0
   6   7  -9  134.64   11.96   0
  -6  -7   9  171.22   12.91   0
  -6   7  -9  170.88   22.68   0
  -7   7  -9   74.87   19.90   0
   7   7  -9   63.04   11.40   0
  -7  -7   9   83.39   11.52   0
   7  -7  -9   86.55   19.53   0
   8  -7  -9  236.18   15.08   0
   8   7  -9  242.59   13.38   0
  -8  -7   9  222.58   13.80   0
  -9  -7   9    9.51   12.03   0
   9   7  -9    4.52   12.07   0
   9  -7  -9    6.78   11.95   0
 -10  -7   9   29.78   11.80   0
  10  -7  -9   26.35   12.30   0
  10   7  -9   42.10   11.22   0
 -11  -7   9   11.90   11.84   0
  11  -7  -9   -0.53   11.73   0
 -12  -7   9   63.69   12.24   0
 -12  -7  -9   71.93   12.80   0
  12  -7  -9   51.43   12.87   0
 -13  -7   9   -3.72   11.53   0
 -13  -7  -9  -16.22   11.22   0
  13  -7  -9    5.64   12.03   0
 -14  -7   9   49.63   11.20   0
 -14  -7  -9   58.07   11.94   0
  14  -7  -9   48.57   13.79   0
 -15  -7   9   -0.67   12.33   0
 -15  -7  -9    3.53   11.89   0
 -16  -7  -9   12.73   12.04   0
 -16  -7   9    3.10   11.74   0
   0  -8   9   68.93   15.50   0
   0   8  -9   55.92   14.55   0
   1  -8   9   22.93   15.29   0
  -1   8  -9   31.10   14.78   0
   1   8  -9   42.37   14.20   0
  -1  -8   9   20.80   14.59   0
  -2   8  -9  248.05   16.76   0
  -2  -8   9  268.44   15.72   0
   2  -8   9  263.89   17.42   0
   2   8  -9  248.06   15.99   0
  -3  -8   9   12.45   14.12   0
  -3   8  -9    0.65   12.29   0
   3  -8   9    5.26   13.74   0
   3   8  -9    0.91   13.02   0
   4  -8   9  557.05   28.18   0
   4   8  -9  542.99   16.00   0
  -4   8  -9  548.66   22.59   0
   4  -8  -9  594.43   19.82   0
  -4  -8   9  489.96   15.89   0
  -5  -8   9    2.79   11.58   0
   5   8  -9    8.33   11.15   0
  -5   8  -9    3.66   13.26   0
   5  -8  -9   -1.05   13.21   0
   6  -8  -9   27.42   13.40   0
  -6   8  -9   15.51   13.43   0
  -6  -8   9   27.12   11.86   0
   6   8  -9   27.40   11.49   0
   7   8  -9   89.89   12.81   0
   7  -8  -9  100.82   14.16   0
  -7  -8   9  107.65   12.98   0
   8  -8  -9   12.87   11.55   0
  -8  -8   9   16.25   12.19   0
   8   8  -9    8.62   11.45   0
   9   8  -9   38.41   11.85   0
  -9  -8   9   42.19   10.94   0
   9  -8  -9   42.53   11.78   0
 -10  -8   9   35.60   11.97   0
  10  -8  -9   45.38   12.65   0
  11  -8  -9    5.22   12.22   0
  12  -8  -9   -0.52   11.84   0
 -12  -8  -9    5.04   10.50   0
 -12  -8   9   14.27   12.16   0
  13  -8  -9    7.14   11.94   0
 -13  -8   9    0.26   11.09   0
 -13  -8  -9    8.32   11.57   0
 -14  -8   9   -3.14   10.92   0
  14  -8  -9   -1.85   12.20   0
 -14  -8  -9   17.97   11.50   0
 -15  -8   9    9.95   12.34   0
 -15  -8  -9    0.83   12.34   0
   1  -9   9  147.50   15.38   0
   1   9  -9  154.11   14.54   0
  -1   9  -9  141.98   13.80   0
  -1  -9   9  149.40   15.11   0
  -2  -9   9   40.57   13.77   0
   2   9  -9   36.87   13.73   0
   2  -9   9   45.13   13.08   0
  -2   9  -9   39.82   12.97   0
  -3   9  -9  235.22   15.74   0
  -3  -9   9  247.22   14.33   0
   3  -9   9  246.45   21.67   0
   3   9  -9  247.17   14.39   0
   4   9  -9  121.03   12.80   0
  -4  -9   9  120.69   12.92   0
  -4   9  -9  111.48   14.60   0
   4  -9   9  111.24   15.48   0
  -5  -9   9   11.94   12.09   0
   5   9  -9   11.62   11.69   0
  -5   9  -9    1.27   12.33   0
   5  -9  -9    9.57   18.97   0
  -6  -9   9  230.08   17.07   0
   6   9  -9  216.18   12.70   0
   6  -9  -9  209.25   15.08   0
   7  -9  -9   10.25   12.27   0
  -7  -9   9   -3.29   11.58   0
   7   9  -9    1.46   11.15   0
  -8  -9   9  117.36   12.04   0
   8  -9  -9   98.72   13.24   0
   8   9  -9  121.79   11.47   0
   9  -9  -9   18.18   11.91   0
  -9  -9   9   46.93   11.42   0
 -10  -9   9   26.25   16.31   0
  10  -9  -9   11.03   12.60   0
 -11  -9   9    9.28   11.71   0
  11  -9  -9    9.87   11.40   0
  12  -9  -9   58.23   12.42   0
 -12  -9  -9   46.95   12.35   0
 -13  -9  -9   -3.43   11.00   0
 -13  -9   9   19.62   12.40   0
  13  -9  -9    3.40   17.37   0
  14  -9  -9    5.73   12.19   0
 -14  -9   9    7.63   11.80   0
 -14  -9  -9    2.79   11.80   0
 -15  -9   9   -0.94   16.42   0
 -15  -9  -9   12.08   11.77   0
   0 -10   9  568.30   17.35   0
   0  10  -9  535.69   17.22   0
   1 -10   9   -8.75   12.16   0
   1  10  -9   -3.66   12.04   0
  -1 -10   9    7.57   12.66   0
  -1  10  -9    7.10   12.94   0
   2  10  -9  285.46   14.02   0
  -2 -10   9  262.15   14.61   0
   2 -10   9  288.48   19.78   0
  -2  10  -9  257.26   18.85   0
  -3  10  -9   66.70   16.88   0
   3  10  -9   70.70   12.37   0
   3 -10   9   61.65   13.07   0
  -3 -10   9   61.93   12.61   0
  -4 -10   9  453.58   15.29   0
  -4  10  -9  428.26   19.35   0
   4 -10   9  435.82   20.04   0
   4  10  -9  419.45   15.39   0
   5 -10  -9   15.15   14.08   0
   5 -10   9    6.47   13.84   0
  -5 -10   9   -4.34   11.83   0
   5  10  -9  -12.84   11.67   0
   6 -10  -9  356.26   17.06   0
  -6 -10   9  548.31   15.71   0
   7  10  -9  -12.12   10.83   0
   7 -10  -9    2.96   13.32   0
  -7 -10   9   13.62   11.72   0
   8 -10  -9   46.40   12.74   0
  -8 -10   9   25.48   11.74   0
   9 -10  -9  110.33   13.22   0
  -9 -10   9  113.25   12.84   0
  10 -10  -9    5.13   12.18   0
 -10 -10   9    1.88   12.27   0
  11 -10  -9   44.49   12.78   0
 -12 -10   9    4.39   11.29   0
 -12 -10  -9   -3.64   11.45   0
  12 -10  -9    6.13   11.78   0
  13 -10  -9   14.93   17.17   0
 -13 -10  -9    6.20   11.72   0
 -13 -10   9   13.61   12.51   0
  14 -10  -9    2.24   12.21   0
 -14 -10  -9    3.24   11.38   0
 -14 -10   9   16.43   12.08   0
 -15 -10  -9    5.97   11.53   0
 -15 -10   9  -11.13   11.41   0
   1 -11   9   38.63   13.15   0
   1  11  -9   47.51   12.21   0
  -1 -11   9   55.37   12.83   0
  -1  11  -9   41.32   11.96   0
   2 -11   9   43.09   12.82   0
  -2 -11   9   45.10   12.29   0
   2  11  -9   21.52   11.38   0
  -2  11  -9   29.82   11.97   0
  -3 -11   9  346.53   14.93   0
   3 -11   9  338.47   16.63   0
   3  11  -9  338.53   14.37   0
  -4 -11   9  223.96   14.06   0
   4 -11   9  210.11   16.57   0
   4  11  -9  194.24   13.32   0
   5  11  -9    5.33   11.65   0
   5 -11   9    4.46   12.57   0
  -5 -11   9   -1.98   11.51   0
  -6 -11   9  164.14   12.86   0
   6 -11  -9  139.72   15.52   0
   7 -11  -9   66.51   13.89   0
  -7 -11   9   66.34   12.10   0
  -8 -11   9   -1.64   10.84   0
   8 -11  -9    2.36   12.17   0
   9 -11  -9    6.67   12.56   0
  -9 -11   9   19.18   11.78   0
  10 -11  -9    1.55   12.12   0
 -10 -11   9   20.89   11.40   0
  11 -11  -9    9.18   16.86   0
 -11 -11   9   13.71   10.99   0
 -11 -11  -9   13.36   11.39   0
  12 -11  -9    6.10   12.03   0
 -12 -11  -9    5.26   11.60   0
 -12 -11   9   12.98   11.36   0
  13 -11  -9    5.44   12.22   0
 -13 -11  -9   25.01   16.28   0
 -14 -11   9   28.48   12.24   0
 -14 -11  -9    8.75   12.27   0
  14 -11  -9   19.92   13.34   0
   0 -12   9  600.35   17.57   0
   1 -12   9   24.32   11.72   0
  -1 -12   9   21.04   11.54   0
   2 -12   9  421.68   16.94   0
  -2 -12   9  425.93   14.84   0
   3 -12   9    4.96   12.47   0
  -3 -12   9   -9.95   11.87   0
   4 -12   9  218.21   16.09   0
  -4 -12   9  161.83   12.99   0
  -5 -12   9   10.73   11.68   0
   5 -12   9    2.31   12.63   0
  -6 -12   9   30.74   11.51   0
   6 -12  -9   48.09   14.21   0
  -7 -12   9   14.08   11.40   0
   7 -12  -9   13.98   17.37   0
   8 -12  -9    9.00   12.72   0
  -8 -12   9   24.33   12.05   0
   9 -12  -9   -7.70   17.04   0
  -9 -12   9   15.33   11.12   0
  10 -12  -9   38.16   12.24   0
 -11 -12   9   39.94   11.24   0
  11 -12  -9   25.18   13.18   0
 -11 -12  -9   25.49   11.28   0
  12 -12  -9    3.11   11.61   0
 -12 -12  -9    3.40   12.45   0
 -13 -12  -9   -2.76   11.96   0
 -13 -12   9  -12.28   11.91   0
  13 -12  -9    2.51   12.24   0
 -14 -12  -9    3.99   11.70   0
   1 -13   9   13.86   11.95   0
  -1 -13   9    6.56   12.04   0
   2 -13   9    4.01   12.51   0
  -2 -13   9   -1.11   11.26   0
   3 -13   9    8.22   12.08   0
  -3 -13   9   26.64   12.75   0
  -4 -13   9   49.09   12.36   0
   4 -13   9   34.86   12.35   0
   5 -13   9   57.03   19.27   0
  -5 -13   9   68.52   12.82   0
   6 -13  -9  100.56   13.85   0
  -6 -13   9  118.42   12.80   0
   7 -13  -9  186.95   15.10   0
  -7 -13   9  200.36   13.34   0
   8 -13  -9    9.63   12.51   0
  -8 -13   9   19.49   11.26   0
  -9 -13   9    2.54   10.97   0
   9 -13  -9    5.55   11.26   0
  10 -13  -9   -0.16   11.67   0
 -10 -13   9   10.46   10.74   0
  11 -13  -9   31.38   12.86   0
 -11 -13  -9   35.18   11.32   0
 -11 -13   9   59.83   12.01   0
 -12 -13  -9   70.04   12.86   0
 -12 -13   9   50.68   12.32   0
  12 -13  -9   42.79   13.86   0
 -13 -13   9   18.92   11.73   0
 -13 -13  -9    2.61   11.42   0
  13 -13  -9    5.65   12.61   0
 -14 -13  -9    2.85   12.64   0
   0 -14   9  121.50   16.48   0
   1 -14   9   66.98   13.60   0
  -1 -14   9   63.84   16.95   0
  -2 -14   9  400.09   14.67   0
   2 -14   9  432.13   16.79   0
  -3 -14   9   10.77   12.45   0
   3 -14   9    0.03   11.75   0
  -4 -14   9   71.16   12.98   0
   4 -14   9   75.57   14.22   0
   5 -14   9   -3.80   18.39   0
  -5 -14   9   -1.13   12.11   0
   6 -14   9    5.02   17.96   0
  -6 -14   9   13.58   11.73   0
   6 -14  -9    1.81   13.34   0
   7 -14  -9   11.95   13.12   0
  -7 -14   9   14.56   11.66   0
   8 -14  -9    7.91   12.67   0
  -8 -14   9    6.50   11.89   0
  -9 -14   9    6.29   10.92   0
   9 -14  -9   11.74   16.87   0
  10 -14  -9   78.32   14.11   0
 -10 -14   9   74.81   11.50   0
  11 -14  -9   47.81   13.19   0
 -11 -14  -9   47.24   12.30   0
 -12 -14  -9   -6.90   12.08   0
 -12 -14   9  -10.07   11.72   0
  12 -14  -9   -0.16   12.20   0
 -13 -14  -9  -10.05   12.18   0
  13 -14  -9   -1.50   12.62   0
   1 -15   9   69.21   13.12   0
  -1 -15   9   81.57   12.47   0
  -2 -15   9  224.57   13.08   0
   2 -15   9  229.98   14.14   0
   3 -15   9   -8.17   11.85   0
  -3 -15   9    8.31   12.51   0
   4 -15   9    9.86   12.44   0
  -4 -15   9   11.09   11.50   0
   5 -15   9   93.11   14.10   0
  -5 -15   9   92.87   12.39   0
   6 -15  -9   29.00   14.86   0
   6 -15   9   22.53   13.53   0
  -6 -15   9   38.62   12.17   0
  -7 -15   9   21.38   11.49   0
   7 -15  -9    0.88   13.36   0
  -8 -15   9    7.55   11.16   0
   8 -15  -9    3.73   11.63   0
  -9 -15   9    4.62   10.48   0
   9 -15  -9   -2.83   17.45   0
 -10 -15  -9   20.30   11.38   0
  10 -15  -9   23.53   12.72   0
 -10 -15   9   47.02   11.61   0
 -11 -15  -9  -13.17   11.46   0
  11 -15  -9    1.54   12.24   0
  12 -15  -9    6.92   12.88   0
 -12 -15  -9   -3.04   11.79   0
 -12 -15   9   -3.26   11.78   0
 -13 -15  -9   -6.53   12.08   0
   0 -16   9   18.78   12.37   0
   1 -16   9    7.60   12.26   0
  -1 -16   9   22.53   12.46   0
  -2 -16   9    3.21   11.89   0
   2 -16   9    3.31   12.20   0
   3 -16   9   47.34   12.98   0
  -3 -16   9   30.21   12.13   0
   4 -16   9  193.87   19.19   0
  -4 -16   9  191.67   13.29   0
  -5 -16   9   45.19   11.78   0
   5 -16   9   23.32   13.29   0
  -6 -16   9  149.97   13.43   0
   6 -16   9  142.86   21.67   0
  -7 -16   9   47.61   11.89   0
   7 -16  -9   33.50   13.37   0
   8 -16  -9    9.72   17.13   0
  -8 -16   9   32.07   11.13   0
  -9 -16   9    9.45   11.68   0
   9 -16  -9    3.86   12.57   0
  10 -16  -9   17.45   12.45   0
 -10 -16  -9   26.37   11.37   0
 -10 -16   9   27.00   11.04   0
  11 -16  -9    9.48   18.18   0
 -11 -16  -9    7.62   11.56   0
 -12 -16  -9   -0.15   12.32   0
  12 -16  -9    1.25   18.01   0
 -12 -16   9   -9.27   11.55   0
  -1 -17   9    5.07   11.69   0
   1 -17   9   -0.72   11.12   0
  -2 -17   9  174.07   14.12   0
   2 -17   9  157.07   14.41   0
   3 -17   9    2.20   12.73   0
  -3 -17   9   18.05   11.57   0
  -4 -17   9   26.88   11.74   0
   4 -17   9    5.26   13.01   0
   5 -17   9    6.30   12.44   0
  -5 -17   9   -4.19   12.29   0
   6 -17   9    8.99   12.49   0
  -6 -17   9   13.89   11.44   0
   7 -17  -9    8.02   12.15   0
  -7 -17   9   33.56   11.36   0
   8 -17  -9    2.24   12.47   0
  -9 -17   9    8.38   12.38   0
   9 -17  -9    0.38   12.03   0
  -9 -17  -9    0.92   10.82   0
  10 -17  -9    4.58   11.86   0
 -10 -17   9    2.19   11.54   0
 -10 -17  -9    3.51   11.35   0
 -11 -17  -9   14.76   12.10   0
  11 -17  -9    1.23   12.64   0
   0 -18   9    9.36   11.60   0
   1 -18   9  152.59   12.93   0
  -1 -18   9  143.90   12.96   0
  -2 -18   9   80.11   12.75   0
   2 -18   9   86.25   12.76   0
   3 -18   9   38.60   12.58   0
  -3 -18   9   32.99   16.19   0
   4 -18   9  197.60   15.04   0
  -4 -18   9  199.77   12.79   0
   5 -18   9    3.21   12.38   0
  -5 -18   9   11.28   11.14   0
   6 -18   9  109.40   16.13   0
  -6 -18   9  153.15   12.34   0
   7 -18  -9   37.72   19.60   0
  -7 -18   9   12.08   12.43   0
   8 -18  -9   -0.66   12.79   0
   9 -18  -9    5.76   18.57   0
  -9 -18   9  -11.80   11.67   0
  -9 -18  -9   11.86   15.82   0
  10 -18  -9   -1.70   11.83   0
 -10 -18  -9    6.32   11.05   0
 -10 -18   9   12.39   11.60   0
  -1 -19   9   24.72   11.87   0
   1 -19   9   25.97   16.75   0
  -2 -19   9   -6.95   11.52   0
   2 -19   9    8.83   11.54   0
  -3 -19   9   -3.63   11.95   0
   3 -19   9    5.70   12.87   0
   4 -19   9   10.80   12.36   0
  -4 -19   9   -0.09   11.58   0
  -5 -19   9   -6.46   11.24   0
   5 -19   9    0.31   12.23   0
   6 -19   9   -0.19   16.84   0
  -6 -19   9    8.91   10.49   0
   7 -19  -9   11.14   13.09   0
  -8 -19  -9   11.64   11.39   0
   8 -19  -9    4.76   12.60   0
   9 -19  -9   -0.20   13.03   0
  -9 -19  -9   -4.61   11.72   0
  -9 -19   9    9.07   11.60   0
   0 -20   9  195.83   13.85   0
   1 -20   9    3.90   11.24   0
  -1 -20   9    2.79   11.67   0
   2 -20   9  161.93   14.26   0
  -2 -20   9  161.21   13.42   0
  -3 -20   9   16.96   11.61   0
   3 -20   9   15.44   12.77   0
   4 -20   9   84.26   13.89   0
  -4 -20   9  143.90   12.54   0
   5 -20   9   18.69   12.41   0
   6 -20   9   13.78   13.79   0
   7 -20  -9    7.23   12.95   0
  -7 -20  -9   -0.27   12.02   0
   8 -20  -9   17.05   19.34   0
  -8 -20  -9   42.41   11.87   0
  -8 -20   9   22.30   12.93   0
  -1 -21   9    1.79   11.64   0
   1 -21   9    8.29   12.41   0
  -2 -21   9   -8.45   11.77   0
   2 -21   9   -1.48   12.25   0
  -3 -21   9   -2.06   11.44   0
   3 -21   9   -1.85   12.72   0
  -4 -21   9   11.23   11.86   0
   4 -21   9    4.23   12.16   0
   5 -21   9    7.66   12.22   0
  -5 -21   9   -5.31   12.17   0
  -6 -21  -9   11.49   11.09   0
   6 -21   9    2.58   12.70   0
  -6 -21   9   -0.17   11.54   0
   7 -21  -9    7.87   13.93   0
  -7 -21  -9   10.62   12.55   0
  -7 -21   9   30.35   12.69   0
   0 -22   9   27.01   12.69   0
   1 -22   9   -6.18   11.94   0
  -1 -22   9  -16.08   17.33   0
  -2 -22   9   72.97   13.15   0
   2 -22   9   90.01   13.38   0
   3 -22   9   11.23   18.02   0
   4 -22   9   15.87   13.82   0
  -4 -22   9   24.63   11.98   0
  -5 -22  -9    8.74   12.28   0
   5 -22   9   -6.46   13.11   0
  -5 -22   9    7.24   11.46   0
  -1 -23   9   -3.87   12.25   0
   1 -23   9    3.13   12.80   0
   2 -23   9   -0.94   12.36   0
  -2 -23   9   11.75   12.34   0
   0   0 -10 1828.88   30.47   0
   1   0 -10   55.60   16.88   0
  -1   0 -10   72.14   16.72   0
  -1   0  10   53.29   17.31   0
  -2   0  10   58.97   15.72   0
   2   0 -10   72.17   15.68   0
  -3   0  10  198.56   16.52   0
   3   0 -10  213.98   16.44   0
   4   0 -10  702.24   19.99   0
  -4   0  10  678.11   20.58   0
   5   0 -10    2.61   15.43   0
  -5   0  10   21.92   22.05   0
   6   0 -10  286.79   15.83   0
  -6   0  10  268.36   16.42   0
   7   0 -10   37.16   12.86   0
  -7   0  10   33.45   13.32   0
  -8   0  10  185.47   13.66   0
   8   0 -10  191.17   13.10   0
   9   0 -10   -5.62   11.98   0
  -9   0  10   -4.50   16.96   0
  10   0 -10  164.50   12.97   0
 -10   0  10  139.94   12.28   0
 -11   0  10   43.42   12.67   0
  11   0 -10   43.38   12.33   0
 -12   0 -10   54.69   11.72   0
  12   0 -10   61.95   11.84   0
 -12   0  10   58.92   17.40   0
  13   0 -10   15.46   11.04   0
 -13   0 -10   -3.52   11.19   0
 -13   0  10   -2.52   12.30   0
 -14   0 -10  123.39   13.55   0
  14   0 -10  157.45   12.67   0
 -14   0  10  119.66   12.47   0
 -15   0 -10    5.42   11.34   0
 -15   0  10   -4.46   11.65   0
 -16   0  10   13.14   12.44   0
 -16   0 -10   10.64   16.55   0
  -1  -1  10   -8.64   16.12   0
  -1   1 -10   10.90   16.73   0
   1  -1 -10    4.72   15.87   0
   1   1 -10   14.31   14.94   0
  -2  -1  10  513.95   19.74   0
  -2   1  10  509.81   25.40   0
   2  -1 -10  518.40   19.70   0
   2   1 -10  540.41   19.47   0
  -2   1 -10  385.24   19.76   0
   3   1 -10   53.94   14.74   0
  -3  -1  10   44.78   14.87   0
   3  -1 -10   35.92   14.66   0
  -3   1  10   40.79   16.15   0
   4   1 -10  377.14   18.04   0
  -4   1  10  354.60   18.57   0
   4  -1 -10  366.37   18.56   0
  -4  -1  10  390.93   24.08   0
   5  -1 -10   11.97   15.20   0
   5   1 -10   22.98   14.84   0
  -5   1  10   32.34   15.82   0
  -5  -1  10   26.78   15.88   0
  -6   1  10   57.52   15.39   0
   6   1 -10   72.01   14.19   0
  -6  -1  10   61.01   14.97   0
   6  -1 -10   74.13   14.69   0
  -7   1  10   68.35   13.65   0
   7  -1 -10   53.02   13.49   0
  -7  -1  10   53.81   13.44   0
   7   1 -10   45.95   13.32   0
   8   1 -10    4.47   11.41   0
  -8   1  10   12.97   11.96   0
   8  -1 -10   -3.78   11.77   0
  -8  -1  10   12.89   11.84   0
   9  -1 -10   46.37   11.76   0
   9   1 -10   55.48   12.12   0
  -9   1  10   60.02   12.61   0
  -9  -1  10   45.39   12.60   0
  10  -1 -10   11.45   11.30   0
 -10   1  10    7.69   11.94   0
  10   1 -10    8.54   11.57   0
 -10  -1  10    6.12   17.05   0
  11   1 -10   10.27   11.64   0
 -11   1 -10   -0.88   11.39   0
  11  -1 -10    6.81   11.35   0
 -11   1  10   14.28   11.97   0
 -11  -1  10   11.95   12.02   0
  12  -1 -10   -1.92   12.16   0
 -12  -1  10   14.26   12.25   0
 -12   1 -10    6.95   16.65   0
 -12  -1 -10   -1.59   10.94   0
  12   1 -10   21.19   10.88   0
 -12   1  10   15.13   12.44   0
 -13  -1 -10   -1.48   10.90   0
  13  -1 -10   -1.92   11.23   0
 -13   1 -10   10.08   11.62   0
  13   1 -10   13.09   15.58   0
 -13   1  10   -1.87   11.41   0
 -13  -1  10    8.46   11.51   0
 -14  -1 -10   -3.20   11.83   0
  14  -1 -10   16.68   11.83   0
 -14   1  10    1.66   12.00   0
  14   1 -10    5.78   11.38   0
 -14   1 -10    9.37   11.39   0
 -14  -1  10   17.88   11.99   0
 -15   1  10   15.87   11.86   0
 -15  -1 -10    6.51   11.87   0
 -15  -1  10    1.31   12.86   0
 -15   1 -10   10.12   11.23   0
 -16   1  10   -4.15   11.45   0
 -16  -1 -10   -2.66   12.47   0
 -16  -1  10   16.05   12.01   0
 -16   1 -10    6.37   11.72   0
   0  -2  10   61.85   16.37   0
   0   2 -10   73.95   22.20   0
  -1  -2  10   15.07   15.48   0
   1   2 -10   19.56   15.16   0
  -1   2 -10    8.39   15.57   0
   1  -2  10   11.15   16.19   0
   1  -2 -10   14.48   16.59   0
   2   2 -10   49.22   15.10   0
  -2  -2  10   60.58   15.42   0
  -2   2 -10   50.09   16.38   0
   2  -2 -10   43.03   15.33   0
  -3   2 -10   25.34   16.63   0
   3   2 -10   17.22   14.12   0
  -3   2  10   24.06   16.58   0
  -3  -2  10   24.30   14.81   0
   3  -2 -10    8.57   14.93   0
  -4   2  10    0.51   16.25   0
   4   2 -10   -3.26   14.82   0
  -4  -2  10  -14.56   15.55   0
   4  -2 -10    4.85   15.81   0
  -5   2  10   20.53   16.88   0
   5   2 -10   25.28   14.34   0
  -5  -2  10   10.13   15.27   0
   5  -2 -10   21.22   16.14   0
   6  -2 -10    9.76   14.28   0
  -6  -2  10   29.94   15.13   0
  -6   2  10    6.40   20.81   0
   6   2 -10   21.68   13.30   0
  -7  -2  10  115.53   13.42   0
   7   2 -10   76.27   12.96   0
   7  -2 -10   98.80   13.96   0
  -7   2  10   94.99   14.43   0
  -8  -2  10   24.62   11.53   0
   8  -2 -10   17.70   11.91   0
  -8   2  10   16.98   12.39   0
   8   2 -10   37.56   16.23   0
  -9  -2  10  122.50   13.13   0
   9   2 -10  136.99   12.85   0
  -9   2  10  132.25   13.23   0
   9  -2 -10  156.53   17.25   0
 -10  -2  10   32.20   11.41   0
  10  -2 -10   13.59   11.94   0
 -10   2  10   18.53   12.90   0
  10   2 -10   13.43   11.04   0
  11   2 -10   65.33   11.98   0
  11  -2 -10   47.87   12.74   0
 -11  -2  10   51.11   12.22   0
 -11   2 -10   63.03   12.34   0
 -11   2  10   74.42   13.42   0
 -12  -2  10   11.31   11.99   0
  12  -2 -10   33.24   11.41   0
  12   2 -10   20.01   11.48   0
 -12   2 -10   11.75   11.95   0
 -12   2  10   11.18   12.07   0
 -12  -2 -10    8.45   15.49   0
 -13  -2 -10   29.96   10.98   0
  13   2 -10   58.69   11.19   0
  13  -2 -10   42.51   11.64   0
 -13   2 -10   36.07   12.13   0
 -13  -2  10   43.21   11.24   0
 -13   2  10   35.59   11.72   0
 -14  -2 -10    5.75   10.65   0
 -14   2 -10    6.21   11.81   0
  14  -2 -10    7.56   11.03   0
 -14   2  10   -2.91   12.49   0
 -14  -2  10    7.87   11.05   0
 -15   2 -10   -4.80   11.86   0
 -15  -2 -10    4.17   11.46   0
 -15   2  10    2.57   12.19   0
 -15  -2  10    6.37   11.76   0
 -16   2  10    4.93   12.26   0
 -16  -2 -10   11.54   12.21   0
 -16  -2  10   21.37   12.45   0
 -16   2 -10   16.76   17.20   0
   1   3 -10    6.97   14.64   0
  -1   3 -10   -4.93   14.43   0
  -1  -3  10    4.34   14.85   0
   1  -3  10    6.58   15.91   0
   2  -3 -10  815.79   22.02   0
   2   3 -10  824.10   20.50   0
  -2   3 -10  830.01   27.38   0
  -2  -3  10  773.53   20.47   0
  -3  -3  10  431.45   22.77   0
   3  -3 -10  414.78   19.15   0
  -3   3 -10  410.86   19.68   0
   3   3 -10  422.39   17.48   0
  -4   3 -10    0.88   16.74   0
  -4   3  10   -3.66   16.48   0
   4   3 -10    3.98   15.76   0
   4  -3 -10  -12.98   15.99   0
  -4  -3  10   -0.82   15.33   0
  -5  -3  10   63.77   15.20   0
  -5   3  10   69.63   17.01   0
   5  -3 -10   59.86   16.20   0
   5   3 -10   76.37   14.35   0
   6  -3 -10  177.92   15.92   0
  -6  -3  10  166.91   14.30   0
  -6   3  10  156.25   22.17   0
   6   3 -10  168.63   15.09   0
   7  -3 -10   58.21   13.37   0
  -7  -3  10   82.54   13.49   0
  -7   3  10   81.00   14.10   0
   7   3 -10   81.63   12.85   0
  -8  -3  10  130.99   12.69   0
   8  -3 -10  162.81   13.78   0
  -8   3  10  146.63   14.25   0
   8   3 -10  187.89   13.29   0
   9  -3 -10   -1.25   12.59   0
  -9   3  10    9.12   11.86   0
   9   3 -10   23.57   11.58   0
  -9  -3  10   40.13   16.43   0
 -10  -3  10   37.52   13.02   0
  10   3 -10   54.11   11.60   0
  10  -3 -10   42.58   12.60   0
 -10   3  10   26.02   12.59   0
 -11  -3  10   -2.34   11.86   0
 -11   3 -10    9.91   11.79   0
  11   3 -10    8.22   11.24   0
  11  -3 -10   -1.93   16.37   0
 -11   3  10    5.02   11.99   0
 -12  -3  10   78.14   12.43   0
 -12   3 -10   68.26   13.22   0
  12  -3 -10   85.60   12.70   0
  12   3 -10   71.52   11.30   0
 -12   3  10   78.32   12.35   0
 -12  -3 -10   89.95   12.76   0
 -13  -3  10   66.43   12.22   0
  13  -3 -10   69.76   11.89   0
 -13  -3 -10   78.80   11.48   0
 -13   3  10   57.55   12.56   0
 -13   3 -10   53.84   12.13   0
  13   3 -10   55.94   12.06   0
 -14   3  10   15.40   12.25   0
 -14   3 -10    3.28   12.47   0
 -14  -3  10   17.45   11.63   0
  14  -3 -10    6.00   12.01   0
 -14  -3 -10   12.49   11.73   0
 -15  -3 -10    4.20   11.95   0
 -15  -3  10    2.35   11.71   0
 -15   3  10    2.38   11.91   0
 -15   3 -10    3.57   12.03   0
 -16   3  10   -6.58   18.06   0
 -16   3 -10   -1.81   12.85   0
 -16  -3 -10    5.03   12.14   0
 -16  -3  10   10.73   16.73   0
   0   4 -10  650.61   20.13   0
   0  -4  10  541.88   19.63   0
  -1  -4  10   22.20   14.39   0
   1   4 -10   12.40   13.80   0
   1  -4  10    7.65   15.93   0
  -1   4 -10   -1.30   14.06   0
  -2   4 -10 3469.51   39.47   0
   2  -4 -10 3529.46   36.42   0
   2   4 -10 3520.90   34.28   0
   2  -4  10 3324.14   39.12   0
  -2  -4  10 3524.25   34.31   0
  -3  -4  10   14.02   14.99   0
   3  -4 -10    6.98   16.83   0
   3   4 -10    7.87   14.42   0
  -3   4 -10    4.54   15.64   0
  -4  -4  10  744.67   20.02   0
   4   4 -10  752.58   19.73   0
  -4   4 -10  711.74   24.29   0
   4  -4 -10  639.44   21.06   0
  -5  -4  10  103.87   14.87   0
  -5   4 -10  109.43   17.83   0
   5  -4 -10  112.02   15.89   0
   5   4 -10   87.06   14.55   0
  -6  -4  10  139.38   14.00   0
  -6   4  10  137.13   15.36   0
   6   4 -10  149.67   14.09   0
   6  -4 -10  134.26   14.51   0
  -7  -4  10  107.38   12.58   0
   7  -4 -10  115.53   13.45   0
   7   4 -10  131.80   16.89   0
  -7   4  10   99.54   14.38   0
  -8  -4  10  151.19   12.57   0
   8  -4 -10  165.39   14.58   0
  -8   4  10  164.12   15.19   0
   8   4 -10  159.15   12.72   0
   9   4 -10  161.39   13.24   0
  -9  -4  10  167.27   13.50   0
  -9   4  10  138.58   15.13   0
   9  -4 -10  170.56   13.73   0
 -10   4 -10  204.73   18.62   0
  10   4 -10  184.75   13.44   0
  10  -4 -10  215.97   14.72   0
 -10   4  10  191.10   14.60   0
 -10  -4  10  194.64   13.90   0
  11   4 -10   13.92   11.00   0
 -11  -4  10   -4.50   11.48   0
  11  -4 -10   -5.13   12.04   0
 -11   4  10    9.83   12.59   0
 -11   4 -10    9.70   12.48   0
 -12  -4 -10  113.00   12.98   0
 -12  -4  10  144.45   12.82   0
  12   4 -10  128.54   11.80   0
  12  -4 -10  108.47   13.39   0
 -12   4  10  103.75   14.23   0
 -12   4 -10  138.67   18.28   0
 -13  -4  10  114.61   12.34   0
 -13   4 -10  109.13   17.71   0
  13  -4 -10  108.65   12.92   0
 -13   4  10  105.30   13.23   0
 -13  -4 -10  106.58   12.08   0
  14  -4 -10   34.65   12.65   0
 -14   4  10   17.16   11.64   0
 -14  -4 -10   26.05   12.17   0
 -14   4 -10   26.50   13.02   0
 -14  -4  10   41.61   11.89   0
 -15  -4  10   -0.85   11.21   0
 -15   4  10   -1.80   12.36   0
  15  -4 -10   -4.70   11.98   0
 -15   4 -10   -0.32   11.79   0
 -15  -4 -10    9.14   15.90   0
 -16  -4  10    2.96   17.17   0
 -16   4  10   -4.40   12.77   0
 -16   4 -10    9.18   16.69   0
 -16  -4 -10   10.59   11.86   0
  -1   5 -10  183.78   16.67   0
   1  -5  10  184.23   17.33   0
   1   5 -10  194.34   15.50   0
  -1  -5  10  183.58   16.71   0
  -2   5 -10    5.36   14.09   0
   2  -5  10   19.50   15.92   0
   2   5 -10  -12.23   15.16   0
  -2  -5  10   -0.48   15.50   0
  -3  -5  10   -1.45   15.42   0
  -3   5 -10   -0.19   15.57   0
   3  -5 -10   15.29   18.24   0
   3   5 -10   17.49   14.56   0
   4  -5 -10  126.66   17.75   0
  -4  -5  10   65.92   14.72   0
  -4   5 -10  110.96   16.44   0
   4   5 -10  125.22   14.64   0
  -5  -5  10   -4.87   13.40   0
  -5   5 -10    5.99   15.24   0
   5   5 -10   15.58   13.22   0
   5  -5 -10   24.87   20.91   0
   6   5 -10    9.49   11.83   0
  -6   5 -10   17.69   15.56   0
  -6  -5  10   30.74   12.66   0
   6  -5 -10    7.24   19.69   0
  -7   5  10   36.69   13.61   0
   7  -5 -10   17.26   12.08   0
  -7   5 -10   19.50   14.60   0
  -7  -5  10   26.66   12.48   0
   7   5 -10   33.17   12.54   0
  -8   5 -10   82.36   15.47   0
   8  -5 -10  142.35   13.85   0
  -8   5  10  125.08   15.28   0
  -8  -5  10  134.24   12.90   0
   8   5 -10  125.00   12.67   0
  -9   5  10    6.05   13.87   0
   9  -5 -10   17.42   12.22   0
   9   5 -10   17.26   11.60   0
  -9  -5  10   27.24   12.12   0
 -10  -5  10  136.08   13.41   0
  10   5 -10  104.25   13.06   0
 -10   5  10  115.20   14.03   0
  10  -5 -10  125.81   13.41   0
 -10   5 -10  116.27   14.42   0
  11   5 -10  -16.25   11.64   0
  11  -5 -10   -0.47   11.98   0
 -11  -5  10   -5.79   11.61   0
 -11   5  10   -8.88   18.25   0
 -11   5 -10    1.20   12.17   0
 -12  -5 -10    0.45   11.59   0
 -12   5  10   11.49   12.86   0
 -12   5 -10    5.56   11.27   0
 -12  -5  10   15.20   11.37   0
  12  -5 -10    6.85   17.07   0
  12   5 -10   -6.25   11.37   0
  13  -5 -10    8.52   11.57   0
 -13  -5  10    5.90   11.96   0
 -13   5  10   -2.89   12.48   0
 -13  -5 -10    7.08   11.24   0
 -13   5 -10    0.06   11.44   0
  14  -5 -10    7.95   10.95   0
 -14  -5  10   -7.20   11.36   0
 -14  -5 -10   -1.69   10.60   0
 -14   5 -10    2.65   11.85   0
 -14   5  10   -4.98   11.36   0
 -15  -5  10  -15.95   11.52   0
  15  -5 -10  -10.36   12.28   0
 -15  -5 -10   -5.70   11.47   0
 -15   5 -10   -1.27   11.70   0
 -15   5  10   -6.53   17.52   0
 -16  -5  10    3.42   11.44   0
 -16   5 -10    2.82   17.16   0
 -16   5  10   -1.33   12.86   0
 -16  -5 -10   11.34   11.77   0
   0  -6  10 5136.37   41.43   0
   0   6 -10 5113.22   42.32   0
  -1  -6  10   10.82   15.47   0
  -1   6 -10   16.20   20.90   0
   1  -6  10   30.24   15.46   0
   1   6 -10   26.49   14.72   0
  -2  -6  10 2077.16   27.20   0
   2   6 -10 2038.49   30.67   0
  -2   6 -10 2100.92   32.10   0
   2  -6  10 1986.75   31.95   0
   3  -6  10    6.56   15.26   0
  -3   6 -10    7.15   15.28   0
   3  -6 -10   31.76   16.93   0
  -3  -6  10   25.02   14.62   0
   3   6 -10   23.49   13.68   0
  -4   6 -10  319.47   24.15   0
  -4  -6  10  311.10   16.38   0
   4  -6 -10  309.00   18.72   0
   4   6 -10  285.30   15.76   0
   5  -6 -10  265.00   17.54   0
   5   6 -10  256.22   14.14   0
  -5  -6  10  260.51   14.62   0
  -5   6 -10  283.28   19.50   0
  -6  -6  10  122.54   12.97   0
   6   6 -10  127.77   12.46   0
   6  -6 -10  104.57   14.46   0
  -6   6 -10  114.45   21.63   0
  -7  -6  10   -0.89   12.34   0
  -7   6 -10    3.47   12.99   0
   7   6 -10    8.55   12.02   0
   7  -6 -10   -6.04   12.90   0
   8  -6 -10  532.45   16.96   0
  -8  -6  10  557.45   16.05   0
  -8   6 -10  425.67   22.53   0
   8   6 -10  554.65   15.42   0
   9  -6 -10  162.58   14.30   0
  -9   6 -10  142.47   17.06   0
  -9  -6  10  161.30   13.42   0
   9   6 -10  158.10   13.14   0
  -9   6 -10  159.75   20.59   0
  10   6 -10   -3.13   12.10   0
 -10   6 -10    3.78   13.62   0
 -10   6  10   -1.71   13.37   0
 -10  -6  10   11.02   11.55   0
  10  -6 -10    4.37   11.96   0
 -10   6 -10    3.16   17.09   0
 -11   6 -10    3.25   11.94   0
 -11   6  10    5.62   17.73   0
  11  -6 -10    9.99   11.79   0
 -11  -6  10   -6.10   11.53   0
  11   6 -10   20.83   11.38   0
 -11   6 -10    0.83   13.19   0
 -12  -6 -10    8.12   10.49   0
 -12  -6  10    6.50   11.67   0
 -12   6 -10   -2.05   12.50   0
 -12   6 -10    1.61   11.98   0
 -12   6  10   -7.38   13.17   0
  12  -6 -10    4.26   11.32   0
  13  -6 -10   52.44   12.56   0
 -13   6 -10   57.94   18.65   0
 -13   6  10   37.79   13.20   0
 -13  -6 -10   39.56   12.08   0
 -13  -6  10   49.17   11.97   0
 -14  -6 -10   12.33   11.56   0
 -14   6 -10    2.67   11.85   0
 -14  -6  10    5.02   11.67   0
 -14   6  10    3.65   12.95   0
 -15  -6  10   -5.93   11.83   0
 -15   6  10   13.08   13.10   0
 -15  -6 -10    0.08   11.32   0
  15  -6 -10   -8.86   12.58   0
 -15   6 -10   -1.64   12.46   0
 -15   6 -10    0.30   13.25   0
 -16  -6  10    8.90   12.23   0
 -16   6 -10    4.16   23.25   0
 -16   6  10    0.04   18.54   0
 -16  -6 -10    2.86   17.05   0
 -16   6 -10    1.45   12.52   0
  -1  -7  10  108.88   16.25   0
   1   7 -10  277.52   16.87   0
  -1   7 -10  277.41   17.54   0
   1  -7  10  278.71   18.03   0
   2   7 -10  812.12   19.91   0
   2  -7  10  631.92   21.87   0
  -2   7 -10  778.70   22.79   0
  -2  -7  10  826.30   19.99   0
  -3  -7  10   29.51   14.39   0
   3  -7  10   16.96   15.16   0
   3   7 -10   11.07   13.67   0
  -3   7 -10   26.99   13.71   0
  -4  -7  10  158.41   13.96   0
   4   7 -10  179.15   13.52   0
  -4   7 -10  166.54   21.47   0
   4  -7 -10  167.31   16.81   0
  -5   7 -10   11.74   13.99   0
   5  -7 -10   13.68   14.21   0
  -5  -7  10    5.12   12.06   0
   5   7 -10   13.44   11.14   0
  -6   7 -10   -2.79   13.10   0
  -6  -7  10    4.24   11.63   0
   6   7 -10    7.65   11.17   0
   6  -7 -10   -0.02   13.40   0
  -7  -7  10    6.97   11.04   0
   7  -7 -10    9.25   12.58   0
  -7   7 -10    7.89   12.20   0
   7   7 -10   -5.59   11.28   0
   8  -7 -10   85.48   13.35   0
  -8   7 -10   54.87   14.91   0
  -8  -7  10   96.19   12.45   0
   8   7 -10   57.90   12.37   0
   9   7 -10   -5.56   11.37   0
  -9  -7  10   -6.78   16.44   0
   9  -7 -10   12.37   12.38   0
  -9   7 -10    3.87   22.41   0
 -10  -7  10   20.84   11.95   0
  10   7 -10   26.81   10.97   0
  10  -7 -10   25.59   11.96   0
 -11  -7  10    9.72   12.20   0
  11  -7 -10   19.83   12.48   0
  11   7 -10    6.87   12.00   0
 -12  -7  10   -2.05   11.80   0
  12  -7 -10   10.58   11.58   0
 -12  -7 -10   18.01   12.15   0
  13  -7 -10   -4.72   11.75   0
 -13  -7 -10   -3.13   11.04   0
 -13  -7  10  -17.17   11.28   0
 -14  -7 -10   12.95   11.30   0
 -14  -7  10   17.95   11.45   0
  14  -7 -10   -6.14   12.35   0
 -15  -7  10   12.73   12.42   0
  15  -7 -10   -0.50   12.27   0
 -15  -7 -10  -11.08   11.00   0
 -16  -7 -10   20.20   11.77   0
 -16  -7  10   18.68   11.89   0
   0  -8  10  210.19   16.50   0
   0   8 -10  200.46   16.26   0
  -1  -8  10   21.76   14.61   0
  -1   8 -10    7.05   13.51   0
   1   8 -10   21.45   13.53   0
   1  -8  10   13.88   15.14   0
  -2   8 -10  486.18   18.03   0
  -2  -8  10  496.02   18.36   0
   2  -8  10  475.04   19.55   0
   2   8 -10  460.67   17.66   0
  -3   8 -10   85.16   14.46   0
   3  -8  10   90.58   15.47   0
   3   8 -10   74.20   12.65   0
  -3  -8  10   85.44   13.09   0
  -4   8 -10   19.46   13.03   0
  -4  -8  10   -0.39   12.48   0
   4  -8 -10   11.59   14.56   0
   4  -8  10   15.60   14.92   0
   4   8 -10   22.77   12.35   0
  -5   8 -10    4.35   13.09   0
   5   8 -10   11.81   11.75   0
   5  -8 -10    2.33   13.45   0
  -5  -8  10   13.52   12.18   0
  -6   8 -10   -1.83   11.81   0
   6   8 -10   -3.37   10.81   0
  -6  -8  10    1.29   16.07   0
   6  -8 -10    3.64   12.68   0
  -7  -8  10  121.53   17.93   0
   7  -8 -10  119.26   13.92   0
   7   8 -10  127.44   12.65   0
  -7   8 -10   93.99   21.01   0
   8  -8 -10   16.39   17.89   0
  -8  -8  10    3.18   11.86   0
   8   8 -10   12.85   11.02   0
   9  -8 -10   82.05   13.16   0
  -9  -8  10   79.20   11.95   0
   9   8 -10   84.62   11.90   0
 -10  -8  10   16.67   11.38   0
  10  -8 -10    3.00   12.03   0
  10   8 -10  -10.40   11.33   0
  11  -8 -10   15.36   11.87   0
 -12  -8 -10    7.75   11.05   0
  12  -8 -10   17.66   11.68   0
 -12  -8  10   11.78   12.08   0
 -13  -8 -10   18.87   11.46   0
  13  -8 -10   17.93   12.56   0
 -14  -8 -10    8.74   11.22   0
  14  -8 -10    6.75   12.31   0
 -14  -8  10   11.95   12.04   0
 -15  -8 -10   39.10   16.98   0
 -15  -8  10   19.40   11.87   0
  15  -8 -10   32.43   12.70   0
   1  -9  10  199.08   14.40   0
  -1  -9  10  209.45   15.05   0
  -1   9 -10  165.41   13.62   0
   1   9 -10  184.83   19.38   0
  -2  -9  10   43.30   13.33   0
  -2   9 -10   38.65   12.61   0
   2  -9  10   39.81   13.51   0
   2   9 -10   42.01   12.98   0
   3   9 -10   74.85   12.76   0
  -3  -9  10   87.88   13.15   0
  -3   9 -10   44.23   12.57   0
   3  -9  10   70.63   18.99   0
   4   9 -10  184.71   12.70   0
  -4  -9  10  190.29   13.58   0
  -4   9 -10  177.20   15.76   0
   4  -9  10  161.31   16.05   0
  -5   9 -10    7.64   12.59   0
   5  -9 -10   15.21   13.39   0
   5   9 -10   -0.26   12.16   0
  -5  -9  10   15.48   12.22   0
  -6   9 -10   29.70   12.85   0
  -6  -9  10   32.75   11.45   0
   6   9 -10   32.70   12.33   0
   6  -9 -10   40.12   13.43   0
   7   9 -10   69.28   12.12   0
   7  -9 -10   77.71   13.35   0
  -7  -9  10   88.34   12.27   0
  -8  -9  10    9.04   10.85   0
   8   9 -10    8.29   10.74   0
   8  -9 -10   10.68   12.86   0
   9   9 -10   -6.31   10.93   0
  -9  -9  10   30.02   11.62   0
   9  -9 -10    4.52   12.41   0
  10  -9 -10    8.62   16.71   0
 -10  -9  10   -4.47   11.77   0
 -11  -9  10   11.01   11.35   0
  11  -9 -10   -6.09   16.90   0
 -12  -9 -10   74.04   11.99   0
  12  -9 -10   87.34   13.34   0
 -13  -9  10   23.29   12.07   0
 -13  -9 -10   12.21   16.10   0
  13  -9 -10    6.68   12.43   0
 -14  -9  10   69.69   12.46   0
 -14  -9 -10   79.09   12.38   0
  14  -9 -10   54.60   13.86   0
 -15  -9  10   -6.74   11.05   0
 -15  -9 -10   22.05   16.19   0
   0 -10  10  179.89   14.03   0
   0  10 -10  260.44   14.48   0
  -1  10 -10   18.07   12.40   0
  -1 -10  10   12.98   12.73   0
   1 -10  10   19.21   12.92   0
   1  10 -10   25.04   12.51   0
  -2  10 -10  141.19   13.65   0
  -2 -10  10  227.08   14.59   0
   2  10 -10  216.84   13.32   0
   2 -10  10  248.61   19.47   0
  -3  10 -10   24.71   11.84   0
  -3 -10  10   15.47   11.71   0
   3 -10  10   17.10   12.79   0
   3  10 -10   32.47   12.31   0
   4 -10  10  282.02   18.30   0
  -4 -10  10  281.94   14.10   0
   4  10 -10  280.60   14.15   0
  -4  10 -10  295.74   17.37   0
  -5  10 -10   12.07   12.33   0
  -5 -10  10   21.01   12.24   0
   5  10 -10   18.48   11.75   0
   5 -10 -10   20.70   14.68   0
  -6 -10  10   69.27   12.04   0
   6 -10 -10   56.95   14.62   0
   7 -10 -10  116.40   13.20   0
  -7 -10  10  141.00   12.58   0
   7  10 -10  121.71   12.02   0
   8  10 -10    7.97   11.12   0
  -8 -10  10    0.99   15.74   0
   8 -10 -10   21.34   16.83   0
   9 -10 -10   69.09   13.06   0
  -9 -10  10   75.77   11.91   0
  10 -10 -10    2.07   17.69   0
 -10 -10  10   16.11   11.22   0
  11 -10 -10   -0.71   12.01   0
  12 -10 -10   -2.76   12.59   0
 -12 -10  10   13.05   11.65   0
 -12 -10 -10   -0.48   11.54   0
 -13 -10 -10   -3.76   10.83   0
  13 -10 -10    5.51   12.13   0
 -14 -10 -10   -6.90   12.18   0
 -14 -10  10    2.09   10.85   0
  14 -10 -10   -2.07   11.81   0
 -15 -10  10    6.99   12.41   0
 -15 -10 -10   16.10   16.95   0
  -1 -11  10   17.37   11.89   0
   1  11 -10   -0.88   11.53   0
   1 -11  10    8.52   12.25   0
  -1  11 -10   -0.95   11.81   0
  -2  11 -10   21.01   11.47   0
  -2 -11  10   16.04   12.48   0
   2  11 -10   34.05   11.39   0
   2 -11  10   28.79   12.15   0
  -3  11 -10   61.80   11.83   0
   3  11 -10   74.30   11.31   0
  -3 -11  10   62.68   12.72   0
   3 -11  10   65.16   12.96   0
   4 -11  10   20.42   13.19   0
  -4 -11  10   26.08   12.44   0
   4  11 -10    8.01   12.12   0
   5 -11  10   20.44   13.01   0
  -5 -11  10   11.69   12.28   0
   5 -11 -10   25.81   14.16   0
   5  11 -10   20.50   12.13   0
   6  11 -10   27.36   11.80   0
   6 -11 -10   27.70   13.41   0
  -6 -11  10   41.02   12.14   0
   7 -11 -10   39.38   13.07   0
  -7 -11  10   47.40   12.05   0
  -8 -11  10  130.65   12.28   0
   8 -11 -10  136.38   13.84   0
   9 -11 -10    0.98   12.69   0
  -9 -11  10    4.42   11.54   0
  10 -11 -10   98.21   17.46   0
 -10 -11  10   79.27   12.16   0
  11 -11 -10   12.23   11.90   0
 -11 -11  10    7.74   11.06   0
 -12 -11 -10   68.86   12.15   0
 -12 -11  10   88.31   12.65   0
  12 -11 -10   76.43   12.83   0
 -13 -11 -10  -12.02   11.75   0
 -13 -11  10  -14.96   12.08   0
  13 -11 -10    2.96   12.24   0
  14 -11 -10   37.40   13.27   0
 -14 -11  10   46.33   11.78   0
 -14 -11 -10   49.17   12.54   0
   0  12 -10   56.27   12.40   0
   0 -12  10   57.77   13.43   0
   1 -12  10   -2.14   12.79   0
  -1 -12  10    6.77   11.99   0
   1  12 -10   23.42   16.48   0
  -1  12 -10    8.99   11.06   0
   2 -12  10    2.90   13.02   0
  -2 -12  10    2.50   11.30   0
   2  12 -10    4.59   11.38   0
  -3 -12  10    8.47   11.94   0
   3  12 -10   -7.84   11.42   0
   3 -12  10    2.30   12.14   0
   4  12 -10   39.34   11.82   0
  -4 -12  10   39.00   12.00   0
   4 -12  10   39.38   12.53   0
   5 -12  10   31.01   19.73   0
  -5 -12  10   20.82   12.70   0
   6 -12 -10    1.32   12.91   0
  -6 -12  10   22.25   11.92   0
   7 -12 -10   24.43   17.77   0
  -7 -12  10   33.24   11.82   0
   8 -12 -10   57.64   12.88   0
  -8 -12  10   55.69   11.57   0
  -9 -12  10   50.82   11.58   0
   9 -12 -10   39.44   12.27   0
  10 -12 -10   15.75   16.43   0
 -10 -12  10   15.25   10.85   0
 -11 -12  10   25.56   10.90   0
  11 -12 -10    3.83   11.50   0
 -12 -12  10    7.96   11.73   0
  12 -12 -10    1.89   11.87   0
 -12 -12 -10    7.04   12.50   0
 -13 -12  10   12.57   11.84   0
 -13 -12 -10   11.88   12.14   0
  13 -12 -10   11.25   12.12   0
 -14 -12 -10    4.43   11.78   0
  14 -12 -10   -4.05   11.78   0
  -1 -13  10   11.74   12.02   0
   1 -13  10   14.17   12.60   0
   2 -13  10   47.75   12.87   0
  -2 -13  10   51.93   17.12   0
  -3 -13  10  209.37   13.86   0
   3 -13  10  205.82   14.50   0
   4 -13  10    1.13   13.26   0
  -4 -13  10    3.71   17.95   0
  -5 -13  10   97.74   13.23   0
   5 -13  10   84.21   14.16   0
   6 -13 -10   65.70   14.12   0
  -6 -13  10   37.33   11.49   0
   7 -13 -10   10.34   13.28   0
  -7 -13  10   17.03   11.49   0
  -8 -13  10   17.14   11.44   0
   8 -13 -10   19.55   12.66   0
  -9 -13  10    9.20   10.98   0
   9 -13 -10    2.57   11.95   0
  10 -13 -10  121.45   14.41   0
 -10 -13  10  107.14   11.78   0
  11 -13 -10    1.57   11.70   0
 -11 -13 -10   14.01   11.94   0
  12 -13 -10   54.27   13.36   0
 -12 -13 -10   64.01   12.04   0
 -12 -13  10   66.55   11.57   0
 -13 -13 -10   -6.37   11.87   0
  13 -13 -10    3.06   12.80   0
   0 -14  10   28.72   12.70   0
  -1 -14  10    4.61   11.78   0
   1 -14  10   -4.74   13.03   0
   2 -14  10   84.12   13.62   0
  -2 -14  10  173.37   13.13   0
   3 -14  10   13.69   12.73   0
  -3 -14  10   15.00   12.76   0
  -4 -14  10    1.65   11.89   0
   4 -14  10   10.99   12.02   0
  -5 -14  10   12.22   11.84   0
   5 -14  10   19.88   18.91   0
   6 -14 -10   67.70   13.85   0
  -6 -14  10   69.10   12.23   0
   7 -14 -10    6.49   12.67   0
  -7 -14  10   -1.26   11.92   0
   8 -14 -10   15.36   11.97   0
  -8 -14  10   -7.62   11.36   0
  -9 -14  10   -0.92   10.72   0
   9 -14 -10    2.03   12.00   0
  10 -14 -10    5.50   11.76   0
 -10 -14  10   17.43   11.55   0
  11 -14 -10   16.47   12.16   0
 -11 -14 -10   10.71   11.86   0
  12 -14 -10    2.42   12.24   0
 -12 -14 -10    2.35   12.03   0
 -12 -14  10    9.09   11.08   0
  13 -14 -10    6.15   12.95   0
 -13 -14 -10   -5.27   17.56   0
  -1 -15  10   14.27   12.63   0
   1 -15  10   28.32   12.44   0
  -2 -15  10  164.10   12.73   0
   2 -15  10  160.76   13.64   0
   3 -15  10   10.23   12.75   0
  -3 -15  10   20.51   11.82   0
  -4 -15  10    4.63   11.76   0
   4 -15  10   -1.41   12.74   0
  -5 -15  10   87.00   12.29   0
   5 -15  10  100.65   14.06   0
  -6 -15  10  162.62   13.09   0
   6 -15  10   77.15   15.17   0
   6 -15 -10  176.46   15.23   0
   7 -15 -10   13.55   12.84   0
  -7 -15  10   27.14   11.96   0
   8 -15 -10   30.06   12.57   0
  -8 -15  10   15.99   11.47   0
   9 -15 -10   21.61   12.18   0
 -10 -15  10   92.48   12.04   0
  10 -15 -10   71.32   13.35   0
  11 -15 -10    3.05   11.65   0
 -11 -15 -10   -2.66   11.37   0
  12 -15 -10   50.26   14.72   0
 -12 -15  10   78.62   11.99   0
 -12 -15 -10   61.23   12.74   0
   0 -16  10   57.54   12.55   0
   1 -16  10   25.78   12.30   0
  -1 -16  10    4.07   12.37   0
   2 -16  10   39.11   12.61   0
  -2 -16  10   21.27   12.42   0
   3 -16  10   11.91   12.60   0
  -3 -16  10   22.42   16.59   0
  -4 -16  10   51.68   11.34   0
   4 -16  10   61.91   12.99   0
   5 -16  10   22.35   12.09   0
  -5 -16  10   12.24   11.79   0
   6 -16 -10    9.98   13.31   0
  -6 -16  10   -1.05   11.79   0
   6 -16  10    5.33   13.08   0
   7 -16 -10   16.04   12.74   0
  -7 -16  10   33.05   11.33   0
   8 -16 -10    4.52   12.43   0
  -8 -16  10   -5.65   11.56   0
   9 -16 -10   21.26   11.94   0
  10 -16 -10    0.95   11.98   0
 -10 -16 -10    2.36   11.32   0
 -10 -16  10    4.39   11.50   0
 -11 -16  10    6.88   11.50   0
 -11 -16 -10    8.66   11.81   0
  11 -16 -10    6.47   18.60   0
  12 -16 -10   17.74   18.54   0
 -12 -16  10   31.10   11.76   0
 -12 -16 -10   24.94   12.61   0
   1 -17  10    9.56   11.08   0
  -1 -17  10    0.33   12.28   0
   2 -17  10   29.06   11.53   0
  -2 -17  10   59.23   11.33   0
  -3 -17  10   99.66   16.63   0
   3 -17  10  111.11   14.30   0
   4 -17  10    8.54   11.44   0
  -4 -17  10    3.23   11.58   0
   5 -17  10    8.76   12.91   0
  -5 -17  10   13.80   10.73   0
  -6 -17  10  208.28   13.34   0
   6 -17  10  151.92   17.30   0
   7 -17 -10    5.76   12.40   0
  -7 -17  10   -2.56   12.22   0
   8 -17 -10   67.50   13.79   0
  -8 -17  10   87.23   13.35   0
   9 -17 -10   39.92   18.31   0
 -10 -17 -10   42.84   11.70   0
  10 -17 -10   50.63   14.59   0
 -10 -17  10   49.76   12.16   0
 -11 -17  10    5.32   12.26   0
  11 -17 -10    8.27   17.12   0
 -11 -17 -10    9.96   11.84   0
   0 -18  10    4.76   12.45   0
   1 -18  10   55.36   12.53   0
  -1 -18  10   56.51   12.09   0
   2 -18  10  113.63   17.74   0
  -2 -18  10   90.48   12.33   0
   3 -18  10    3.99   12.39   0
  -3 -18  10    1.01   11.16   0
  -4 -18  10   -5.50   11.32   0
   4 -18  10    4.39   16.64   0
   5 -18  10   -3.33   16.85   0
  -5 -18  10    5.13   11.56   0
  -6 -18  10   12.91   12.05   0
   6 -18  10    0.16   12.34   0
   7 -18 -10   40.56   13.86   0
  -7 -18  10   54.28   12.95   0
   8 -18 -10    6.85   12.73   0
  -9 -18 -10  -12.06   11.48   0
   9 -18 -10   10.60   12.17   0
  10 -18 -10    0.11   12.77   0
 -10 -18 -10    7.14   11.62   0
 -10 -18  10    7.68   12.13   0
   1 -19  10  150.75   14.24   0
  -1 -19  10  144.03   13.45   0
  -2 -19  10   57.51   11.87   0
   2 -19  10   37.22   17.56   0
   3 -19  10   79.87   18.21   0
  -3 -19  10   74.08   12.65   0
  -4 -19  10    8.22   11.55   0
   4 -19  10   -1.47   13.45   0
   5 -19  10   52.59   13.70   0
  -5 -19  10   56.00   11.48   0
   6 -19  10    4.89   12.53   0
  -6 -19  10   10.34   11.07   0
   7 -19 -10    4.54   18.34   0
  -7 -19  10  -12.13   11.97   0
   8 -19 -10   42.21   13.56   0
  -9 -19 -10   -8.67   11.59   0
  -9 -19  10   24.15   12.47   0
   9 -19 -10    7.75   13.35   0
   0 -20  10    3.41   12.39   0
   1 -20  10   11.63   12.12   0
  -1 -20  10   -4.82   10.75   0
   2 -20  10    8.78   11.05   0
  -2 -20  10    7.13   11.69   0
   3 -20  10    5.02   17.95   0
  -3 -20  10   -1.70   11.44   0
  -4 -20  10   -2.57   11.46   0
   4 -20  10    1.79   12.43   0
   5 -20  10    3.24   12.42   0
   6 -20  10   10.80   13.65   0
   7 -20 -10   10.15   13.37   0
   8 -20 -10    7.89   18.15   0
  -8 -20 -10    6.34   11.94   0
   1 -21  10   16.65   12.93   0
  -1 -21  10   20.51   12.20   0
  -2 -21  10   23.73   12.39   0
   2 -21  10   23.52   12.95   0
  -3 -21  10    6.82   11.70   0
   3 -21  10   -0.06   12.55   0
  -4 -21  10   27.40   11.44   0
   4 -21  10   29.66   13.29   0
   5 -21  10   -4.37   12.84   0
  -5 -21  10   21.10   12.02   0
  -6 -21  10   -2.62   11.98   0
   6 -21  10   21.15   19.09   0
  -7 -21  10   11.20   12.27   0
  -7 -21 -10   10.15   12.10   0
   7 -21 -10    5.08   13.26   0
   0 -22  10    0.16   16.74   0
  -1 -22  10   12.21   11.44   0
   1 -22  10   -3.51   12.45   0
   2 -22  10   24.79   12.35   0
  -2 -22  10    6.81   12.19   0
   3 -22  10   -3.21   12.16   0
  -4 -22  10   -9.21   12.08   0
   4 -22  10   -1.61   18.27   0
  -5 -22  10   10.22   11.92   0
   5 -22  10    3.06   12.28   0
  -1 -23  10   22.86   13.08   0
   1 -23  10   13.07   12.63   0
   2 -23  10   -6.32   12.44   0
  -2 -23  10    9.86   12.46   0
  -1  -1  11   89.40   16.29   0
  -1   1 -11   94.38   16.36   0
   1  -1 -11   87.23   16.20   0
   1   1 -11   93.26   15.83   0
   2  -1 -11   13.43   15.04   0
  -2   1  11    1.86   15.21   0
  -2  -1  11  -12.32   14.24   0
  -2   1 -11   -4.35   16.40   0
   2   1 -11    6.13   14.45   0
   3   1 -11  474.14   23.09   0
  -3   1  11  432.70   19.03   0
  -3  -1  11  423.12   18.17   0
   3  -1 -11  450.66   19.04   0
  -4  -1  11   16.34   15.66   0
   4   1 -11   13.31   15.06   0
  -4   1  11    5.27   16.27   0
   4  -1 -11   -8.07   15.47   0
   5  -1 -11  215.08   16.44   0
   5   1 -11  243.88   16.06   0
  -5  -1  11  206.40   17.02   0
  -5   1  11  208.33   17.09   0
   6   1 -11   24.66   13.93   0
  -6   1  11   27.92   14.71   0
  -6  -1  11   13.73   14.78   0
   6  -1 -11   23.15   13.96   0
   7  -1 -11  130.57   13.41   0
  -7   1  11  102.52   13.93   0
   7   1 -11  137.25   12.88   0
  -7  -1  11   51.77   13.47   0
   8  -1 -11   18.88   11.93   0
  -8   1  11   17.54   11.99   0
  -8  -1  11   19.96   11.91   0
   8   1 -11   15.82   11.39   0
   9   1 -11    3.51   11.71   0
  -9   1  11    9.72   12.26   0
  -9  -1  11    3.74   11.56   0
   9  -1 -11   -3.42   11.08   0
  10   1 -11   25.37   10.65   0
 -10   1  11   23.37   12.90   0
  10  -1 -11   27.12   11.49   0
 -10  -1  11   14.01   11.29   0
  11  -1 -11  -11.92   12.25   0
 -11   1  11   22.51   12.05   0
  11   1 -11   18.54   10.76   0
 -11  -1  11   12.19   12.64   0
  12   1 -11   25.01   12.44   0
 -12   1 -11    7.95   11.05   0
  12  -1 -11    7.42   12.46   0
 -12   1  11   16.33   11.41   0
 -12  -1  11   22.22   11.05   0
 -12  -1 -11   18.86   11.75   0
  13   1 -11   11.27   10.95   0
 -13  -1 -11   -0.82   10.98   0
  13  -1 -11   14.92   11.65   0
 -13   1 -11    4.95   11.53   0
 -13   1  11   -9.96   11.89   0
 -13  -1  11    8.20   11.33   0
 -14   1 -11    8.97   10.86   0
  14  -1 -11    4.11   11.93   0
  14   1 -11    3.34   11.65   0
 -14  -1 -11    6.17   11.46   0
 -14   1  11    3.89   11.10   0
 -14  -1  11   -6.35   11.06   0
 -15  -1 -11    4.23   12.08   0
  15  -1 -11    0.32   11.78   0
 -15   1 -11   20.12   15.90   0
 -15   1  11   15.51   12.50   0
 -15  -1  11   -0.16   12.02   0
 -16   1 -11    2.56   11.61   0
 -16   1  11   -3.37   11.94   0
 -16  -1 -11   15.97   16.56   0
 -16  -1  11  -11.04   12.22   0
   0  -2  11   61.21   15.79   0
   0   2 -11   70.23   15.33   0
   1  -2 -11   18.65   15.63   0
  -1  -2  11   17.60   14.99   0
  -1   2 -11    3.12   15.11   0
   1   2 -11   16.60   15.07   0
  -2   2 -11    1.60   16.35   0
  -2  -2  11    5.89   14.59   0
   2   2 -11  -12.77   14.51   0
   2  -2 -11   14.45   15.11   0
   3   2 -11   17.09   14.25   0
  -3   2 -11   29.76   16.16   0
   3  -2 -11   16.91   15.79   0
  -3   2  11   -0.38   22.94   0
  -3  -2  11   22.18   14.87   0
   4  -2 -11   12.39   15.69   0
   4   2 -11   19.05   14.89   0
  -4   2  11   29.49   16.71   0
  -4  -2  11    3.91   15.18   0
  -5   2  11  119.72   16.70   0
   5   2 -11  135.18   14.79   0
  -5  -2  11  133.43   15.32   0
   5  -2 -11  134.52   16.03   0
   6  -2 -11   26.21   14.11   0
  -6   2  11   -2.17   15.02   0
   6   2 -11   29.02   13.49   0
  -6  -2  11   10.34   12.97   0
   7  -2 -11   32.25   12.58   0
  -7   2  11   20.29   13.65   0
  -7  -2  11   20.00   13.12   0
   7   2 -11   42.56   17.06   0
   8  -2 -11   10.26   12.07   0
   8   2 -11    5.22   16.17   0
  -8   2  11    3.07   12.50   0
  -8  -2  11   10.26   11.71   0
  -9   2  11   26.12   12.15   0
   9  -2 -11   43.53   16.92   0
   9   2 -11   19.85   12.88   0
  -9  -2  11   33.11   13.15   0
  10  -2 -11  201.94   14.44   0
  10   2 -11  223.96   13.36   0
 -10   2  11  184.78   13.94   0
 -10  -2  11  216.94   13.48   0
  11   2 -11    3.98   11.42   0
  11  -2 -11  -13.20   11.56   0
 -11   2  11   -0.97   12.04   0
 -11  -2  11   -7.97   10.91   0
 -12   2 -11   33.69   12.66   0
 -12   2  11   47.53   13.32   0
  12   2 -11   51.86   10.83   0
  12  -2 -11   50.62   12.08   0
 -12  -2  11   35.46   17.82   0
  13  -2 -11   -3.85   10.78   0
 -13  -2 -11    7.58   15.38   0
 -13   2  11   -4.88   11.57   0
  13   2 -11  -12.55   11.18   0
 -13   2 -11   -1.35   11.17   0
 -13  -2  11   -0.46   11.64   0
  14  -2 -11   -0.98   11.81   0
 -14  -2 -11    7.10   10.93   0
 -14   2  11    8.49   11.83   0
 -14   2 -11    7.43   16.44   0
  14   2 -11   11.45   11.37   0
 -14  -2  11    4.98   11.40   0
 -15  -2 -11   -2.67   11.56   0
 -15   2 -11    2.90   11.76   0
 -15   2  11   -2.83   11.79   0
  15  -2 -11    6.77   11.75   0
 -15  -2  11   10.04   11.65   0
 -16   2  11    4.95   12.12   0
 -16   2 -11    4.16   11.67   0
 -16  -2 -11   -6.10   11.89   0
 -16  -2  11   10.93   15.62   0
   1   3 -11  711.16   19.35   0
  -1   3 -11  691.97   20.62   0
  -1  -3  11  685.50   24.98   0
   1  -3  11  654.78   21.38   0
   2   3 -11  495.30   18.38   0
   2  -3 -11  517.89   20.03   0
  -2   3 -11  492.90   19.96   0
  -2  -3  11  470.57   18.38   0
  -3   3 -11  442.40   20.14   0
   3  -3 -11  446.36   19.64   0
   3   3 -11  435.30   18.03   0
  -3  -3  11  422.92   18.34   0
  -4   3 -11   58.43   17.37   0
   4   3 -11   62.53   14.92   0
   4  -3 -11   65.13   16.55   0
  -4   3  11   66.04   17.45   0
  -4  -3  11   89.07   21.96   0
   5   3 -11  484.48   16.85   0
  -5   3  11  449.76   18.96   0
   5  -3 -11  470.66   23.63   0
  -5  -3  11  477.11   17.59   0
   6  -3 -11   56.12   14.15   0
  -6   3  11   48.71   14.60   0
   6   3 -11   69.85   13.66   0
  -6  -3  11   44.76   14.36   0
  -7  -3  11  126.82   13.06   0
   7   3 -11  141.88   12.98   0
  -7   3  11  116.10   14.01   0
   7  -3 -11  140.43   13.59   0
  -8  -3  11    3.62   12.55   0
   8   3 -11   21.47   11.06   0
   8  -3 -11    7.40   12.79   0
  -8   3  11   10.06   12.59   0
  -9  -3  11  247.68   14.69   0
  -9   3  11  246.40   15.50   0
   9  -3 -11  258.49   14.68   0
   9   3 -11  244.68   13.95   0
 -10  -3  11    6.94   11.87   0
 -10   3  11   13.88   18.70   0
  10  -3 -11    4.53   12.77   0
  10   3 -11   -4.01   11.99   0
  11   3 -11   -1.94   11.39   0
  11  -3 -11    7.90   11.94   0
 -11  -3  11   19.59   11.76   0
 -11   3  11    6.72   12.76   0
 -11   3 -11   11.30   12.35   0
 -12  -3  11   -0.58   10.66   0
  12  -3 -11   -0.44   10.84   0
 -12   3  11    8.49   12.80   0
  12   3 -11    2.33   11.42   0
 -13   3 -11   25.69   15.84   0
  13  -3 -11   42.27   11.41   0
  13   3 -11   22.12   11.47   0
 -13  -3 -11   21.12   11.36   0
 -13   3  11   25.23   12.44   0
 -13  -3  11   11.78   11.27   0
 -14  -3 -11    3.44   10.78   0
  14  -3 -11    5.42   12.06   0
 -14   3 -11   10.04   10.95   0
 -14   3  11    9.58   11.51   0
 -14  -3  11   11.95   11.69   0
 -15   3 -11    6.34   12.07   0
  15  -3 -11   11.69   12.22   0
 -15  -3 -11    4.85   11.84   0
 -15   3  11    3.66   12.50   0
 -15  -3  11    9.90   11.78   0
 -16   3  11   11.52   12.54   0
 -16  -3 -11   17.10   11.21   0
 -16   3 -11    6.80   12.68   0
 -16  -3  11    6.09   11.93   0
   0  -4  11   -2.53   14.69   0
   0   4 -11   -2.36   14.34   0
   1   4 -11  614.57   19.71   0
  -1  -4  11  604.82   19.87   0
   1  -4  11  590.32   21.01   0
  -1   4 -11  575.32   19.37   0
   2  -4  11   -7.75   22.00   0
   2  -4 -11   -9.00   17.39   0
   2   4 -11    6.23   14.57   0
  -2   4 -11   -6.57   14.69   0
  -2  -4  11   -2.97   14.67   0
   3  -4 -11  534.92   20.28   0
   3   4 -11  624.32   20.02   0
  -3   4 -11  611.55   21.67   0
  -3  -4  11  626.28   20.39   0
  -4   4 -11   83.43   17.03   0
   4   4 -11  237.36   16.68   0
   4  -4 -11   79.84   17.06   0
  -4  -4  11  244.46   16.65   0
  -5  -4  11  923.17   19.06   0
  -5   4 -11  940.02   25.88   0
   5  -4 -11  918.45   21.45   0
   5   4 -11  944.58   18.96   0
   6   4 -11  111.26   13.38   0
  -6   4  11   94.45   14.69   0
  -6  -4  11  109.85   13.97   0
  -6   4 -11   95.87   15.89   0
   6  -4 -11   94.07   14.22   0
   7  -4 -11    5.14   12.28   0
  -7  -4  11   -3.79   12.49   0
  -7   4  11    2.26   12.88   0
   7   4 -11   10.38   17.32   0
  -8  -4  11   38.47   11.92   0
   8  -4 -11   54.80   12.20   0
   8   4 -11   42.43   11.74   0
  -8   4  11   45.66   19.74   0
  -9  -4  11   -3.02   13.15   0
  -9   4  11   16.83   13.24   0
   9  -4 -11   11.43   13.02   0
   9   4 -11    4.71   12.39   0
 -10   4  11   24.50   13.31   0
  10   4 -11   25.84   12.01   0
  10  -4 -11   13.78   12.32   0
 -10  -4  11    7.08   12.15   0
 -11  -4  11   21.65   12.27   0
  11  -4 -11   27.78   16.45   0
 -11   4  11   22.17   17.64   0
  11   4 -11   -5.66   11.35   0
 -11   4 -11   -1.75   12.24   0
  12   4 -11    1.41   10.33   0
 -12   4  11   -0.61   11.35   0
 -12   4 -11   -1.68   15.85   0
 -12  -4  11    4.70   10.70   0
  12  -4 -11    5.28   12.26   0
  13  -4 -11   -0.25   11.52   0
 -13  -4  11   -9.79   15.64   0
  13   4 -11   -2.17   11.11   0
 -13   4 -11    5.56   11.69   0
 -13   4  11   -4.26   11.98   0
 -13  -4 -11    6.03   10.59   0
 -14  -4 -11   12.02   11.31   0
 -14  -4  11   33.07   11.99   0
 -14   4 -11   11.00   16.60   0
 -14   4  11    1.59   16.45   0
  14  -4 -11    6.40   11.25   0
  15  -4 -11    8.13   11.36   0
 -15   4 -11    1.99   11.73   0
 -15  -4 -11    2.47   11.42   0
 -15   4  11    5.93   11.91   0
 -15  -4  11    9.84   11.95   0
 -16  -4 -11    1.33   16.92   0
 -16   4  11    3.64   12.59   0
 -16   4 -11    1.71   11.51   0
 -16  -4  11   -1.81   10.88   0
  -1   5 -11  214.94   16.20   0
   1  -5  11  405.32   19.04   0
  -1  -5  11  397.49   18.64   0
   1   5 -11  413.08   18.05   0
   2   5 -11   17.41   14.91   0
   2  -5  11   24.87   23.36   0
  -2  -5  11   36.14   15.77   0
  -2   5 -11   24.88   14.73   0
  -3  -5  11 1536.78   24.84   0
   3  -5 -11 1532.29   26.70   0
   3   5 -11 1163.66   21.17   0
  -3   5 -11  762.06   22.51   0
  -4  -5  11   31.43   14.32   0
   4  -5 -11   33.75   16.56   0
  -4   5 -11   28.35   15.08   0
   4   5 -11   25.41   13.91   0
   5   5 -11  267.52   13.92   0
  -5  -5  11  274.44   14.42   0
   5  -5 -11  269.37   17.26   0
  -5   5 -11  243.43   18.23   0
   6   5 -11   15.32   12.06   0
  -6   5 -11   12.74   14.97   0
  -6  -5  11   -1.90   11.64   0
   6  -5 -11   10.04   13.24   0
   7  -5 -11   16.10   12.21   0
  -7   5 -11   33.11   14.85   0
  -7  -5  11   25.17   12.58   0
   7   5 -11   32.29   11.70   0
   8  -5 -11   -4.48   12.62   0
   8   5 -11   13.09   11.89   0
  -8   5  11    4.92   19.26   0
  -8  -5  11    6.07   12.27   0
  -8   5 -11    5.57   13.32   0
  -9  -5  11   83.73   13.22   0
   9   5 -11   89.22   12.97   0
  -9   5  11   83.60   13.68   0
   9  -5 -11   89.81   13.65   0
 -10   5 -11   37.61   12.12   0
  10  -5 -11   33.44   12.48   0
 -10  -5  11   29.50   17.18   0
 -10   5  11   29.57   13.15   0
  10   5 -11   34.17   11.94   0
  11  -5 -11    4.19   11.81   0
 -11  -5  11   24.63   11.25   0
 -11   5  11   -0.00   12.78   0
 -11   5 -11    7.11   16.62   0
  11   5 -11    7.73   11.31   0
  12  -5 -11   20.15   12.10   0
 -12   5  11   22.07   11.87   0
 -12  -5  11   24.12   10.42   0
 -12   5 -11   14.01   12.13   0
  12   5 -11   31.16   10.16   0
 -13   5 -11   -4.99   12.29   0
 -13   5  11   -0.32   12.49   0
 -13  -5 -11    9.84   11.17   0
  13   5 -11   26.35   10.98   0
  13  -5 -11    2.45   11.68   0
 -13  -5  11   -6.52   11.31   0
 -14  -5  11   63.77   11.85   0
 -14   5  11   57.30   13.64   0
 -14  -5 -11   58.58   15.94   0
  14  -5 -11   48.52   12.77   0
 -14   5 -11   46.28   13.64   0
 -15  -5  11   12.50   12.31   0
 -15   5  11    4.84   12.74   0
 -15   5 -11    3.47   12.02   0
 -15  -5 -11   -0.26   11.55   0
  15  -5 -11    3.16   12.18   0
 -16  -5  11   57.45   12.51   0
 -16   5  11   61.34   18.88   0
 -16   5 -11   47.34   14.24   0
 -16  -5 -11   63.18   12.85   0
   0  -6  11 1459.89   25.70   0
   0   6 -11 1458.00   25.51   0
   1  -6  11    3.89   16.34   0
   1   6 -11   -0.79   15.29   0
  -1  -6  11   18.27   15.67   0
  -1   6 -11    1.05   15.62   0
  -2  -6  11   20.18   14.88   0
   2  -6  11   19.99   16.18   0
  -2   6 -11   30.68   15.43   0
   2   6 -11   12.55   14.59   0
  -3  -6  11  359.15   16.87   0
   3  -6  11  323.43   19.61   0
   3  -6 -11  342.02   19.27   0
  -3   6 -11  338.12   18.73   0
   3   6 -11  347.20   16.10   0
  -4  -6  11  361.27   15.76   0
   4   6 -11  308.73   15.07   0
   4  -6 -11  332.61   18.06   0
  -4   6 -11  345.43   19.05   0
  -5  -6  11   68.70   12.43   0
   5   6 -11   53.69   12.20   0
   5  -6 -11   71.42   14.94   0
  -5   6 -11   67.19   15.13   0
   6   6 -11   26.30   11.06   0
  -6  -6  11   19.88   11.41   0
   6  -6 -11   19.91   12.95   0
  -6   6 -11    5.47   13.20   0
  -7   6 -11  140.37   16.16   0
   7   6 -11  130.85   12.62   0
  -7  -6  11  153.79   12.70   0
   7  -6 -11  156.76   14.53   0
   8  -6 -11   32.47   12.74   0
   8   6 -11   38.13   12.11   0
  -8   6 -11   25.99   13.09   0
  -8  -6  11   18.39   12.19   0
   9   6 -11   27.65   12.51   0
  -9  -6  11   16.36   12.86   0
   9  -6 -11   36.52   12.73   0
  -9   6 -11    5.00   13.78   0
 -10  -6  11  105.84   12.99   0
  10  -6 -11   99.68   13.10   0
  10   6 -11   85.63   12.35   0
 -10   6 -11   32.10   14.58   0
 -10   6 -11   81.34   14.51   0
 -11   6 -11    0.57   16.21   0
  11   6 -11   -7.41   11.37   0
 -11   6 -11    3.46   13.22   0
 -11  -6  11   -2.97   11.35   0
 -11   6  11   10.85   12.59   0
  11  -6 -11    2.24   11.51   0
 -12   6  11   19.23   17.39   0
 -12   6 -11    4.50   12.06   0
 -12   6 -11    7.13   12.61   0
 -12  -6  11    5.86   12.04   0
  12   6 -11   26.46   10.46   0
  12  -6 -11   -1.76   11.84   0
 -13  -6  11    5.39   11.29   0
 -13   6 -11    5.05   11.60   0
 -13   6 -11    5.56   13.10   0
 -13  -6 -11   10.71   11.79   0
  13  -6 -11    0.77   16.53   0
 -13   6  11   10.67   17.95   0
 -14  -6  11   13.06   11.30   0
 -14   6 -11    3.37   11.81   0
  14  -6 -11   17.41   10.98   0
 -14   6 -11    7.84   13.13   0
 -14  -6 -11   15.71   10.93   0
 -14   6  11    6.59   18.55   0
 -15   6  11    9.40   17.97   0
 -15   6 -11    3.07   16.98   0
 -15  -6  11   10.89   11.14   0
 -15  -6 -11    4.46   11.85   0
 -15   6 -11   -0.02   18.62   0
  15  -6 -11   -0.07   11.96   0
 -16  -6  11   14.90   12.43   0
 -16  -6 -11   -1.49   11.90   0
 -16   6  11    2.56   13.23   0
 -16   6 -11   -0.77   13.11   0
 -16   6 -11    1.19   17.81   0
  -1  -7  11  553.05   18.79   0
  -1   7 -11  506.41   19.36   0
   1   7 -11  514.72   18.38   0
   1  -7  11  524.05   19.83   0
  -2   7 -11   10.26   19.24   0
   2   7 -11    7.96   13.34   0
  -2  -7  11    2.25   14.51   0
   2  -7  11   13.12   14.85   0
  -3  -7  11  719.02   18.40   0
   3   7 -11  727.68   18.53   0
   3  -7  11  684.77   22.79   0
  -3   7 -11  716.41   22.39   0
  -4   7 -11   48.55   13.49   0
   4  -7 -11   65.82   15.75   0
   4   7 -11   62.54   11.97   0
  -4  -7  11   42.90   12.88   0
   5  -7 -11  262.16   15.73   0
  -5  -7  11  253.83   13.76   0
  -5   7 -11  240.88   17.99   0
   5   7 -11  248.43   13.47   0
  -6   7 -11   90.69   14.98   0
  -6  -7  11   66.82   12.46   0
   6  -7 -11   74.69   14.37   0
   6   7 -11   91.67   11.79   0
  -7   7 -11   13.22   12.30   0
   7   7 -11   20.98   11.07   0
  -7  -7  11   28.16   16.90   0
   7  -7 -11   17.47   13.07   0
  -8  -7  11   10.21   16.69   0
   8   7 -11    1.65   11.49   0
   8  -7 -11   10.60   13.08   0
  -8   7 -11    7.14   12.08   0
   9  -7 -11   67.74   12.59   0
  -9  -7  11   68.02   12.04   0
  -9   7 -11   58.09   18.94   0
   9   7 -11   62.95   12.60   0
  -9   7 -11   55.37   15.69   0
 -10   7 -11    3.91   20.45   0
 -10  -7  11  -14.19   11.49   0
  10  -7 -11    5.33   11.76   0
  10   7 -11   -4.56   11.18   0
 -10   7 -11    1.80   12.31   0
 -11  -7  11   39.08   12.31   0
  11   7 -11   24.12   12.35   0
  11  -7 -11   58.17   13.06   0
  12  -7 -11    9.96   12.06   0
  13  -7 -11    7.59   11.77   0
 -13  -7 -11   25.45   11.67   0
 -13  -7  11   22.08   11.44   0
 -14  -7  11   22.41   12.11   0
  14  -7 -11    9.05   11.99   0
 -14  -7 -11   -2.63   11.79   0
 -15  -7  11   11.47   11.69   0
 -15  -7 -11   13.77   12.32   0
  15  -7 -11   21.56   12.93   0
   0  -8  11  146.76   15.48   0
   0   8 -11  133.16   14.74   0
  -1  -8  11   24.76   14.62   0
   1   8 -11   30.42   14.06   0
  -1   8 -11   24.73   13.58   0
   1  -8  11   25.82   14.03   0
   2   8 -11   -0.52   13.16   0
  -2   8 -11   -4.02   12.08   0
  -2  -8  11   -6.65   14.08   0
   2  -8  11    4.65   13.10   0
   3   8 -11  172.79   13.83   0
  -3  -8  11  178.58   14.02   0
   3  -8  11  158.91   20.15   0
  -3   8 -11  184.93   18.73   0
  -4  -8  11   34.72   12.53   0
   4   8 -11   42.03   11.42   0
  -4   8 -11   46.48   13.73   0
   4  -8 -11   34.51   14.44   0
   4  -8  11   41.67   13.97   0
  -5  -8  11   75.77   12.58   0
  -5   8 -11   73.93   18.86   0
   5  -8 -11   65.16   13.67   0
   5   8 -11   77.42   12.50   0
  -6   8 -11    6.13   17.53   0
   6   8 -11   11.16   11.45   0
   6  -8 -11   -2.06   13.82   0
  -6  -8  11  -22.12   11.44   0
  -7  -8  11  247.55   13.74   0
   7   8 -11  229.87   13.32   0
  -7   8 -11  243.39   23.05   0
   7  -8 -11  249.92   15.36   0
  -8  -8  11  -10.23   11.49   0
  -8   8 -11    4.78   17.12   0
   8  -8 -11   12.99   12.02   0
   8   8 -11   20.19   11.09   0
  -9  -8  11  137.40   12.77   0
   9   8 -11  145.53   12.48   0
   9  -8 -11  155.44   13.20   0
  10  -8 -11   18.77   17.01   0
 -10  -8  11   17.25   12.00   0
  10   8 -11   22.16   11.24   0
  11  -8 -11  144.01   14.07   0
  11   8 -11  144.75   12.83   0
  12  -8 -11    9.46   11.52   0
 -12  -8  11   23.25   11.77   0
  13  -8 -11   42.92   13.61   0
 -13  -8 -11   39.44   11.79   0
  14  -8 -11    5.18   12.04   0
 -14  -8 -11   10.74   11.56   0
 -14  -8  11   -0.19   11.32   0
 -15  -8  11    2.22   11.76   0
 -15  -8 -11   15.64   12.13   0
  15  -8 -11   -6.86   12.17   0
  -1  -9  11  450.91   17.05   0
   1  -9  11  442.03   16.79   0
   1   9 -11  414.55   16.08   0
  -1   9 -11  451.91   16.45   0
   2  -9  11   36.31   13.30   0
  -2  -9  11   39.29   13.55   0
   2   9 -11   25.53   12.86   0
  -2   9 -11   25.22   12.28   0
  -3   9 -11   88.75   13.39   0
  -3  -9  11   96.70   13.40   0
   3  -9  11   92.90   14.12   0
   3   9 -11   88.73   12.80   0
  -4  -9  11   16.52   12.11   0
  -4   9 -11   10.66   17.24   0
   4   9 -11    0.66   16.99   0
   4  -9  11   23.91   13.94   0
   5   9 -11   79.03   12.51   0
   5  -9 -11   92.13   14.74   0
  -5  -9  11   98.63   12.57   0
  -5   9 -11   85.59   13.82   0
  -6  -9  11   27.56   11.97   0
   6   9 -11   41.10   11.41   0
   6  -9 -11   53.87   13.71   0
  -6   9 -11   36.70   12.56   0
   7   9 -11  169.16   12.64   0
  -7  -9  11  202.55   12.80   0
   7  -9 -11  185.50   14.96   0
  -7   9 -11  114.88   19.50   0
   8   9 -11  105.71   12.12   0
  -8  -9  11  119.24   11.96   0
   8  -9 -11  134.46   17.84   0
   9  -9 -11   19.64   12.23   0
  -9  -9  11   11.91   11.70   0
   9   9 -11   45.93   11.32   0
 -10  -9  11   13.84   11.96   0
  10  -9 -11   20.36   17.42   0
  10   9 -11    7.79   11.75   0
 -11  -9  11   97.77   11.90   0
  11  -9 -11   82.16   13.07   0
  12  -9 -11   40.19   12.50   0
 -13  -9  11    3.21   11.52   0
  13  -9 -11    4.99   11.21   0
 -13  -9 -11   21.01   11.22   0
 -14  -9  11   -9.18   16.19   0
  14  -9 -11   10.46   12.55   0
 -14  -9 -11    3.61   11.68   0
  15  -9 -11    9.34   12.74   0
 -15  -9  11    6.86   11.99   0
 -15  -9 -11    6.68   12.33   0
   0 -10  11   38.53   12.88   0
   0  10 -11   47.50   12.19   0
   1  10 -11  -15.51   12.17   0
   1 -10  11    6.57   17.74   0
  -1 -10  11    6.33   12.38   0
  -1  10 -11    8.98   11.64   0
   2  10 -11   14.75   12.00   0
   2 -10  11   22.06   12.25   0
  -2 -10  11   24.90   12.52   0
  -2  10 -11   13.02   12.39   0
   3  10 -11   16.14   11.34   0
  -3 -10  11   32.50   12.74   0
   3 -10  11   32.87   13.00   0
  -3  10 -11   26.71   12.36   0
  -4 -10  11   25.29   11.67   0
   4  10 -11   17.30   11.23   0
   4 -10  11   20.69   17.76   0
  -4  10 -11    9.55   12.62   0
  -5  10 -11    8.44   11.56   0
  -5 -10  11   15.45   12.38   0
   5  10 -11   29.64   11.49   0
   5 -10 -11    8.09   13.12   0
   6 -10 -11   26.32   13.64   0
  -6  10 -11   21.48   16.77   0
  -6 -10  11   14.53   12.17   0
   7  10 -11   13.71   11.50   0
  -7 -10  11   18.69   16.43   0
   7 -10 -11   11.27   13.58   0
  -8 -10  11   22.49   11.66   0
   8  10 -11   34.76   11.32   0
   8 -10 -11   20.94   12.04   0
   9  10 -11   58.71   12.05   0
   9 -10 -11   65.87   13.21   0
  -9 -10  11   81.70   12.60   0
 -10 -10  11   24.25   11.67   0
  10 -10 -11    9.05   12.35   0
  11 -10 -11  206.60   18.51   0
 -12 -10  11   20.11   10.96   0
  12 -10 -11    5.18   11.97   0
  13 -10 -11   19.87   12.34   0
 -13 -10 -11   31.65   12.09   0
 -14 -10  11   -7.62   11.44   0
  14 -10 -11    9.73   13.02   0
 -14 -10 -11    5.29   11.05   0
 -15 -10 -11    8.76   12.41   0
  15 -10 -11    1.13   12.94   0
 -15 -10  11    4.00   12.20   0
   1 -11  11  163.70   14.08   0
  -1 -11  11  164.23   13.16   0
  -1  11 -11  171.89   13.58   0
   1  11 -11  160.93   12.72   0
  -2 -11  11   10.93   11.41   0
   2 -11  11   19.28   13.02   0
   2  11 -11   11.97   11.10   0
  -2  11 -11    4.57   17.17   0
  -3 -11  11   85.51   13.34   0
   3 -11  11   88.71   18.13   0
   3  11 -11   77.15   11.67   0
  -3  11 -11   79.79   12.80   0
   4 -11  11    8.56   11.96   0
   4  11 -11   10.94   11.96   0
  -4 -11  11    4.24   12.13   0
  -4  11 -11    4.27   11.54   0
   5 -11  11   39.04   13.28   0
   5  11 -11   58.21   12.19   0
   5 -11 -11   70.84   20.33   0
  -5 -11  11   59.24   12.52   0
   6 -11 -11   17.36   19.00   0
  -6 -11  11    4.32   11.40   0
   6  11 -11   -3.37   11.20   0
   7  11 -11  144.61   11.47   0
   7 -11 -11  132.04   14.02   0
  -7 -11  11  156.94   12.49   0
  -8 -11  11   36.50   11.00   0
   8  11 -11   29.29   11.34   0
   8 -11 -11   30.19   12.85   0
  -9 -11  11   -2.75   11.30   0
   9 -11 -11   -1.68   11.85   0
  10 -11 -11   30.26   16.99   0
 -10 -11  11   50.24   10.82   0
 -11 -11  11   63.42   11.06   0
  11 -11 -11   51.18   12.96   0
 -12 -11 -11   -7.48   11.79   0
  12 -11 -11   24.64   12.08   0
  13 -11 -11    3.42   11.55   0
 -13 -11  11   -2.25   12.03   0
 -13 -11 -11    7.18   11.79   0
  14 -11 -11    6.61   12.85   0
 -14 -11 -11   -0.70   16.86   0
   0 -12  11   18.63   12.76   0
   0  12 -11   17.97   11.15   0
  -1  12 -11   30.48   16.17   0
   1 -12  11   31.52   18.10   0
   1  12 -11   19.65   11.28   0
  -1 -12  11   23.35   12.48   0
  -2  12 -11    7.18   12.09   0
  -2 -12  11   -4.85   11.10   0
   2  12 -11    5.02   11.57   0
   2 -12  11   -0.49   12.10   0
  -3 -12  11   35.04   12.12   0
   3 -12  11   37.55   12.45   0
   3  12 -11   41.47   11.82   0
  -3  12 -11   40.88   12.25   0
   4 -12  11  236.30   20.36   0
  -4 -12  11  209.82   14.00   0
   4  12 -11  222.94   13.63   0
   5  12 -11   85.95   12.91   0
   5 -12  11   83.79   15.27   0
  -5 -12  11  100.86   13.08   0
  -6 -12  11  121.59   12.52   0
   6  12 -11  114.24   12.21   0
   6 -12 -11  113.37   13.88   0
  -7 -12  11   -7.39   12.41   0
   7 -12 -11   -3.26   17.57   0
  -8 -12  11  127.15   12.04   0
   8 -12 -11  100.65   13.33   0
  -9 -12  11  150.11   12.24   0
   9 -12 -11  150.61   14.22   0
  10 -12 -11   13.02   11.48   0
 -10 -12  11   23.65   11.31   0
  11 -12 -11  170.79   15.91   0
 -11 -12  11  181.20   12.99   0
 -12 -12 -11  -10.87   12.54   0
  12 -12 -11    2.50   11.20   0
 -12 -12  11   -7.75   11.27   0
  13 -12 -11   55.52   13.60   0
 -13 -12 -11   48.66   11.87   0
 -13 -12  11   79.01   12.28   0
  14 -12 -11    5.98   12.57   0
 -14 -12 -11   13.53   12.11   0
   1 -13  11   46.77   12.70   0
  -1 -13  11   48.18   12.64   0
   1  13 -11   46.20   12.16   0
   2 -13  11   62.56   12.99   0
  -2 -13  11   62.62   11.70   0
   2  13 -11   64.76   11.02   0
  -3 -13  11   39.33   12.80   0
   3  13 -11   42.87   11.61   0
   3 -13  11   33.27   12.45   0
  -4 -13  11  134.25   13.10   0
   4 -13  11  109.74   15.76   0
   5 -13  11   42.04   13.88   0
  -5 -13  11   46.82   17.46   0
  -6 -13  11   27.58   12.00   0
   6 -13 -11   23.36   13.91   0
  -7 -13  11   51.37   12.84   0
   7 -13 -11   85.95   13.71   0
  -8 -13  11  -15.48   11.36   0
   8 -13 -11    2.68   12.81   0
  -9 -13  11    5.15   10.95   0
   9 -13 -11    0.34   11.96   0
  10 -13 -11   98.87   13.21   0
 -10 -13  11  121.76   12.01   0
  11 -13 -11    0.99   16.75   0
 -12 -13 -11   -5.49   12.39   0
 -12 -13  11   -7.06   11.42   0
  12 -13 -11    1.64   11.85   0
  13 -13 -11    3.05   12.00   0
 -13 -13 -11   -5.32   12.15   0
   0 -14  11  235.91   14.51   0
   1 -14  11   -7.55   13.11   0
  -1 -14  11   -0.15   16.36   0
   2 -14  11    0.85   12.98   0
  -2 -14  11   18.19   12.10   0
  -3 -14  11   53.16   12.57   0
   3 -14  11   48.19   12.42   0
  -4 -14  11   27.59   12.33   0
   4 -14  11   28.63   13.94   0
   5 -14  11   27.21   13.13   0
  -5 -14  11    2.96   12.06   0
   6 -14 -11   82.55   18.63   0
  -6 -14  11   87.25   12.24   0
   7 -14 -11   35.04   18.17   0
  -7 -14  11   33.58   11.76   0
   8 -14 -11    2.84   12.03   0
  -8 -14  11   21.61   11.22   0
  -9 -14  11   92.21   11.77   0
   9 -14 -11   73.97   13.38   0
  10 -14 -11    4.91   13.08   0
 -10 -14  11   12.94   11.52   0
  11 -14 -11   41.75   13.33   0
 -11 -14  11   52.43   11.80   0
 -12 -14 -11   -2.01   11.99   0
 -12 -14  11   17.13   11.27   0
  12 -14 -11   -1.08   12.68   0
  13 -14 -11   46.30   14.21   0
 -13 -14 -11   50.63   13.25   0
   1 -15  11  121.03   13.63   0
  -1 -15  11  112.58   13.19   0
  -2 -15  11  404.85   15.34   0
   2 -15  11  448.71   16.41   0
  -3 -15  11   20.35   12.07   0
   3 -15  11   10.25   12.93   0
   4 -15  11   -3.78   12.67   0
  -4 -15  11   -5.14   11.82   0
   5 -15  11    2.56   13.33   0
  -5 -15  11    4.41   11.22   0
   6 -15  11    2.63   12.43   0
   6 -15 -11   -0.03   13.39   0
  -6 -15  11  -14.70   11.61   0
   7 -15 -11   11.13   12.80   0
  -7 -15  11    7.38   11.47   0
  -8 -15  11   28.57   11.18   0
   8 -15 -11   17.11   12.14   0
   9 -15 -11    5.23   12.65   0
  10 -15 -11   31.35   12.20   0
 -10 -15  11   48.19   11.09   0
  11 -15 -11   -0.85   17.08   0
 -11 -15  11    3.50   11.24   0
 -11 -15 -11    4.38   11.37   0
 -12 -15 -11    4.48   11.89   0
  12 -15 -11    6.62   13.28   0
   0 -16  11   93.84   13.24   0
   1 -16  11  349.75   19.05   0
  -1 -16  11  293.84   14.79   0
   2 -16  11   32.42   12.65   0
  -2 -16  11   24.52   13.11   0
  -3 -16  11   21.93   11.83   0
   3 -16  11   13.87   12.46   0
   4 -16  11   27.66   12.64   0
  -4 -16  11   -0.16   12.07   0
   5 -16  11    9.42   11.88   0
  -5 -16  11   14.08   11.81   0
   6 -16  11    3.59   12.37   0
  -6 -16  11   17.57   11.90   0
[truncated: 578,852 more chars]
