# Supplementary material
Source: MDPI journal article supplement (https://www.mdpi.com/2073-4352/13/4/569)
Supplement: s1 [file s1 › C51H47N9O14Zn.fcf]

#
# h,k,l, Fc-squared, Fo-squared, sigma(Fo-squared), status flag
#
data_C51H47N9O14Zn
_shelx_title ' Pbca'
_shelx_refln_list_code          4
_shelx_F_calc_maximum      586.69
_exptl_crystal_F_000      4464.00
_reflns_d_resolution_high  0.8377

loop_
 _space_group_symop_operation_xyz
 'x, y, z'
 '-x+1/2, -y, z+1/2'
 '-x, y+1/2, -z+1/2'
 'x+1/2, -y+1/2, -z'
 '-x, -y, -z'
 'x-1/2, y, -z-1/2'
 'x, -y-1/2, z-1/2'
 '-x-1/2, y-1/2, z'

_cell_length_a    14.6426
_cell_length_b    20.0946
_cell_length_c    32.3448
_cell_angle_alpha  90.000
_cell_angle_beta   90.000
_cell_angle_gamma  90.000

_shelx_F_squared_multiplier     1.000

loop_
 _refln_index_h
 _refln_index_k
 _refln_index_l
 _refln_F_squared_calc
 _refln_F_squared_meas
 _refln_F_squared_sigma
 _refln_observed_status
   2   0   0      39176.88      40356.19       946.61 o
   4   0   0      14439.33      12661.01       734.71 o
   6   0   0      99168.30      97787.13      1227.58 o
   8   0   0      11847.89      10948.32       555.71 o
  10   0   0        407.01        391.19       413.43 o
  12   0   0          0.55       -111.57       406.02 o
  14   0   0        209.43         78.03       409.55 o
  16   0   0        217.10        420.49       399.31 o
   2   1   0        291.43        253.86       407.10 o
   4   1   0      38972.21      36021.99       639.61 o
   6   1   0      10994.49      10728.99       432.50 o
   8   1   0       8981.81       8057.38       373.51 o
  10   1   0        724.76        364.42       332.44 o
  12   1   0        556.07        453.98       335.46 o
  14   1   0       1541.89       1541.80       296.65 o
  16   1   0        158.06        -86.50       290.69 o
   2   2   0      28879.99      29282.62      1792.12 o
   4   2   0      73647.48      75259.59      1094.72 o
   6   2   0       1891.28       1420.17       369.60 o
   8   2   0       5605.10       5397.67       404.62 o
  10   2   0       3852.76       3887.98       320.76 o
  12   2   0        263.40        439.06       304.75 o
  14   2   0         89.25        201.13       286.06 o
  16   2   0        281.82        547.16       285.63 o
   4   3   0      29046.75      27148.10      1980.37 o
   6   3   0       4426.95       4503.69       437.49 o
   8   3   0      22910.70      25638.32       508.48 o
  10   3   0       1409.95       1440.00       291.87 o
  12   3   0       9820.95      11078.32       413.02 o
  14   3   0       3107.84       2299.36       304.05 o
  16   3   0         13.58        -34.77       292.90 o
   4   4   0      55084.09      51728.45       795.39 o
   6   4   0      39348.04      36965.69      1374.28 o
   8   4   0       2592.05       2466.96       343.18 o
  10   4   0        845.10        869.05       299.31 o
  12   4   0       1837.09       1952.86       312.70 o
  14   4   0        560.86        203.14       297.07 o
  16   4   0        329.84        214.47       293.95 o
   4   5   0         47.77        233.05       393.54 o
   6   5   0       8480.92       8072.08       415.36 o
   8   5   0      15759.75      15932.76       447.39 o
  10   5   0       2784.04       3111.51       325.60 o
  12   5   0        608.66        875.96       305.10 o
  14   5   0       6266.72       6546.91       631.62 o
  16   5   0          4.58         72.35       298.39 o
   4   6   0       2139.92       1327.36       378.43 o
   6   6   0      12831.25      12690.66       504.62 o
   8   6   0      17998.30      18320.88       536.65 o
  10   6   0        190.44        276.17       307.03 o
  12   6   0         33.93        146.00       289.64 o
  14   6   0        209.06        215.96       286.93 o
  16   6   0         21.04       -109.70       289.94 o
   4   7   0       8534.93       9421.00       590.31 o
   6   7   0       7090.14       8177.17       506.99 o
   8   7   0      17378.73      18279.92       562.42 o
  10   7   0        121.16        275.03       432.85 o
  14   7   0       1429.43       1025.63       415.20 o
  16   7   0        162.71       1013.63       433.20 o
   4   8   0       5605.30       5641.16       553.24 o
   6   8   0       9174.35       8905.53       484.75 o
   8   8   0       2340.76       1532.98       455.44 o
  10   8   0       5297.14       5615.74       445.91 o
  12   8   0          1.08        247.14       364.36 o
  14   8   0        251.28       -243.26       403.90 o
  16   8   0        233.34        246.79       415.55 o
   4   9   0       5066.05       4518.43       506.28 o
   6   9   0       4291.48       4284.16       796.09 o
   8   9   0      14686.96      14972.83       531.35 o
  10   9   0       2599.91       3278.50       437.79 o
  12   9   0       2740.47       2773.27       426.85 o
  14   9   0       3208.34       3585.30       427.20 o
  16   9   0        382.69         -5.30       448.74 o
   4  10   0      56369.80      56622.00       760.49 o
   6  10   0        257.64        271.13       302.00 o
   8  10   0       2052.32       2384.20       427.55 o
  10  10   0      13938.73      15197.02       515.11 o
  12  10   0         15.62       -402.49       407.43 o
  14  10   0         27.09       -362.94       400.72 o
   2  11   0        159.23        101.33       444.50 o
   4  11   0       9577.92       9322.85       501.34 o
   6  11   0       6043.58       5769.92       339.72 o
   8  11   0      10077.44       9563.98       469.21 o
  10  11   0       9267.48      10295.17       479.10 o
  12  11   0       1568.94       1517.80       408.84 o
  14  11   0       1435.72       1549.22       461.09 o
   2  12   0        134.30        456.86       591.37 o
   4  12   0       6529.35       7321.85       374.59 o
   6  12   0       3827.68       4181.41       372.43 o
   8  12   0       2996.79       3205.77       427.55 o
  10  12   0         92.31        290.21       397.54 o
  14  12   0        128.02        140.16       406.02 o
   2  13   0       3438.03       3655.61       509.29 o
   4  13   0       3736.49       4115.49       330.29 o
   6  13   0       1140.66        844.06       312.16 o
   8  13   0       5204.08       6048.59       439.20 o
  10  13   0      14437.33      15222.80       481.57 o
  14  13   0        899.89        403.55       608.67 o
   0  14   0       2174.24       2508.12       432.50 o
   2  14   0       2244.09       1803.17       313.44 o
   4  14   0       2342.90       2182.68       308.85 o
   6  14   0         96.58       -232.04       340.02 o
   8  14   0         10.96        -40.60       403.55 o
  10  14   0        790.22        271.50       387.30 o
  12  14   0       2409.35       2915.90       430.38 o
  14  14   0        529.04       -161.35       606.20 o
   2  15   0        412.86        866.35       295.83 o
   4  15   0        352.27        -50.23       304.74 o
   6  15   0       4061.21       4285.33       501.52 o
   8  15   0        456.93        775.67       377.07 o
  10  15   0       2983.70       2616.51       401.43 o
  12  15   0         78.37        671.52       420.49 o
   0  16   0       3035.32       3673.57       446.27 o
   2  16   0        212.86        497.82       297.94 o
   4  16   0        412.44        542.36       293.92 o
   6  16   0        713.14        609.09       300.20 o
   8  16   0        406.01        324.81       380.24 o
  12  16   0          0.15        404.25       403.90 o
   2  17   0       2519.96       2971.20       349.40 o
   4  17   0       4674.42       5243.18       345.29 o
   6  17   0       1802.99       1720.85       316.11 o
   8  17   0       4938.75       4024.51       442.03 o
   0  18   0       6926.30       6712.34       456.15 o
   2  18   0         63.74       -240.79       282.10 o
   4  18   0        869.26        578.98       308.94 o
   6  18   0        207.48        225.25       436.03 o
  10  18   0        571.08       1309.84       401.07 o
   2  19   0        833.00        999.35       294.04 o
   4  19   0       1913.26       1833.64       310.26 o
   6  19   0        128.43        446.42       297.10 o
   8  19   0       1635.60       2113.05       443.09 o
   0  20   0         35.89        200.54       403.19 o
   2  20   0       1262.10       1515.57       543.71 o
   4  20   0        248.81        130.13       280.97 o
   6  20   0          3.25         66.73       417.31 o
   2  21   0       1340.09       1362.20       289.42 o
   4  21   0        539.99        537.03       300.99 o
   6  21   0        270.63        433.10       310.97 o
   8  21   0        597.99        941.25       427.55 o
   0  22   0       1606.42       1215.58       431.44 o
   2  22   0       3977.45       3417.15       457.03 o
   4  22   0        525.44        306.10       291.16 o
   6  22   0         50.32        -14.12       452.62 o
   2  23   0        471.50        -44.87       340.14 o
   4  23   0       1087.11        634.09       432.85 o
   1   1   1      24124.93      22396.65       677.89 o
   2   1   1       6962.25       6172.37       439.62 o
   3   1   1      64544.23      61145.27       624.00 o
   4   1   1      35453.45      34394.89       398.78 o
   5   1   1      31831.62      29676.74       337.73 o
   6   1   1      56840.62      52935.01       625.76 o
   7   1   1       4441.85       4234.34       278.21 o
   8   1   1       1795.97       1458.38       240.17 o
   9   1   1       1485.07       1491.77       245.25 o
  10   1   1       7231.14       7491.87       264.60 o
  11   1   1       1211.95        955.96       217.94 o
  12   1   1       3393.09       3589.02       240.51 o
  13   1   1        866.01       1012.48       207.00 o
  14   1   1       3865.54       4312.85       267.11 o
  15   1   1        232.11         97.36       201.58 o
  16   1   1       2659.45       2331.12       227.08 o
  17   1   1         31.42        181.35       223.87 o
   0   2   1       1686.20       1193.73       447.78 o
   1   2   1        262.90        290.61       386.20 o
   2   2   1       1753.73       1204.71       350.24 o
   3   2   1      53476.29      46321.88      2926.75 o
   4   2   1      16244.50      14941.96       623.06 o
   5   2   1          8.27        193.32       223.15 o
   6   2   1       5845.14       6040.15       257.79 o
   7   2   1      47043.96      47395.34       484.55 o
   8   2   1       1294.35       1233.65       235.76 o
   9   2   1        381.74        428.10       207.20 o
  10   2   1        320.12        474.26       206.86 o
  11   2   1        565.92        662.38       199.94 o
  12   2   1        104.79        192.62       204.10 o
  13   2   1        123.64        314.32       217.77 o
  14   2   1       1357.85       1251.16       220.89 o
  15   2   1        101.79        313.32       203.31 o
  16   2   1        155.70        343.88       209.11 o
  17   2   1         78.90        132.34       229.96 o
   1   3   1      47488.21      46332.85       959.00 o
   2   3   1        587.21        782.38       592.43 o
   3   3   1        365.84        371.86       350.98 o
   4   3   1       1774.42       1459.11       301.45 o
   5   3   1         63.00         -2.92       229.70 o
   6   3   1      22127.29      21394.22       350.63 o
   7   3   1       4888.64       4903.63       258.56 o
   8   3   1       7743.45       7289.45       264.52 o
   9   3   1       1497.79       1659.97       227.79 o
  10   3   1       3695.16       3693.32       227.50 o
  11   3   1        705.13        647.98       204.32 o
  12   3   1       2777.99       3050.85       222.60 o
  13   3   1        127.26        135.54       211.14 o
  14   3   1       1542.72       1459.33       219.53 o
  15   3   1        127.85        105.74       201.88 o
  16   3   1        404.98        388.99       203.27 o
  17   3   1        263.03        120.48       214.01 o
   0   4   1       8802.31       9835.13       829.33 o
   1   4   1        518.54        429.67       588.90 o
   2   4   1       3427.61       3868.10       559.60 o
   3   4   1      35467.09      35765.25       714.72 o
   4   4   1       3372.21       3079.08       504.34 o
   5   4   1      10961.37      10784.84       308.31 o
   6   4   1      16467.13      16649.63       456.42 o
   7   4   1       1465.47       1536.09       240.91 o
   8   4   1         98.40        250.74       228.75 o
   9   4   1       8846.14       8968.44       257.66 o
  10   4   1        630.89        685.74       212.62 o
  11   4   1        801.16        784.94       210.99 o
  12   4   1         35.94        -29.07       225.23 o
  13   4   1         16.35        154.14       228.72 o
  14   4   1         28.20         98.64       221.13 o
  15   4   1          1.17         19.00       216.49 o
  16   4   1         24.61        215.65       220.49 o
  17   4   1        262.76        197.05       216.70 o
   1   5   1       7190.98       6057.77       624.21 o
   2   5   1         29.05        120.39       515.82 o
   3   5   1       1712.09       1687.97       514.41 o
   4   5   1       5883.70       5440.95       427.10 o
   5   5   1       2915.12       2940.90       331.84 o
   6   5   1      12915.30      10680.86      1047.99 o
   7   5   1       3941.69       3988.95       258.87 o
   8   5   1       2550.93       2382.75       242.75 o
   9   5   1        871.88       1039.58       229.71 o
  10   5   1       5338.84       5198.79       238.29 o
  11   5   1       1522.21       1500.88       238.32 o
  12   5   1       4247.24       4326.57       236.35 o
  13   5   1         60.40        191.00       211.61 o
  14   5   1       2419.60       2510.98       257.86 o
  15   5   1        461.60        466.27       208.93 o
  16   5   1        838.10        797.19       219.16 o
  17   5   1         21.10        187.26       209.85 o
   1   6   1       5328.89       4826.30       602.32 o
   2   6   1      16606.60      15108.40       662.34 o
   3   6   1      12731.37      12193.91       610.08 o
   4   6   1       8634.97       7748.50       488.00 o
   5   6   1       1014.06        960.29       301.39 o
   6   6   1         82.58        214.61       274.94 o
   7   6   1          8.34        162.97       259.64 o
   8   6   1       1549.11       1698.52       301.70 o
   9   6   1       5312.19       5575.43       261.58 o
  10   6   1        653.97        620.78       230.29 o
  11   6   1       2865.96       3037.14       233.85 o
  12   6   1          3.41       -105.86       217.68 o
  13   6   1         26.65       -114.33       194.00 o
  14   6   1        891.21        825.72       216.30 o
  15   6   1        237.16        127.16       226.66 o
  16   6   1        406.55        344.40       219.15 o
   1   7   1        725.54        798.97       486.87 o
   2   7   1       8936.20       8374.89       552.54 o
   3   7   1      42901.72      39538.95       808.86 o
   4   7   1       7654.72       7474.51       503.47 o
   5   7   1        116.56        360.14       291.38 o
   6   7   1        546.23        671.13       289.30 o
   7   7   1       5027.53       5710.92       382.22 o
   8   7   1       7397.77       7436.12       343.26 o
   9   7   1       2587.53       2939.66       313.00 o
  10   7   1       3935.61       4314.22       558.71 o
  11   7   1       1968.31       2023.73       443.44 o
  12   7   1       1164.83        698.70       620.68 o
  13   7   1        112.03       -114.48       261.84 o
  14   7   1       1560.24       2053.37       314.40 o
  15   7   1         39.55        348.79       286.88 o
  16   7   1         16.54       -268.36       268.36 o
   0   8   1      17537.57      17115.19       663.40 o
   1   8   1       2206.56       1926.28       507.70 o
   2   8   1       2340.98       1904.04       528.17 o
   3   8   1       5458.17       5390.70       399.26 o
   4   8   1       6735.83       5302.70       632.86 o
   5   8   1       3384.96       3914.71       265.69 o
   6   8   1       8877.48       8170.09       309.73 o
   7   8   1        438.47        443.50       299.43 o
   8   8   1       1740.73       1458.23       306.69 o
   9   8   1        338.87        721.04       404.78 o
  10   8   1       2969.48       3065.17       408.49 o
  11   8   1        151.15        458.87       377.60 o
  12   8   1       1781.66       1915.82       299.75 o
  13   8   1        126.11        177.76       289.09 o
  14   8   1         10.52       -191.66       282.83 o
  15   8   1        239.09        411.25       291.59 o
  16   8   1        198.09        -24.04       296.80 o
   1   9   1      24213.81      24557.63       553.24 o
   2   9   1       7474.58       8050.54       422.23 o
   3   9   1       3229.54       3579.55       374.90 o
   4   9   1        429.21        575.97       344.98 o
   5   9   1        382.51        433.39       207.35 o
   6   9   1         75.50         69.95       240.68 o
   7   9   1        736.33        644.81       306.80 o
   8   9   1        851.32        816.20       404.07 o
   9   9   1       1098.25       1468.85       304.39 o
  10   9   1      17763.84      18316.50       625.97 o
  11   9   1        624.02        919.22       294.57 o
  12   9   1       1521.69       1838.40       292.24 o
  13   9   1       1268.97        659.67       284.93 o
  14   9   1       3260.29       3188.04       299.55 o
  15   9   1         63.59         83.28       288.35 o
  16   9   1        622.41        412.32       356.66 o
   0  10   1       4699.52       4248.35       748.13 o
   1  10   1       7800.29       7737.28       405.00 o
   2  10   1       2294.75       1813.88       392.25 o
   3  10   1        769.26        959.84       341.99 o
   4  10   1      13468.78      13090.82       451.59 o
   5  10   1         31.85        203.35       268.56 o
   6  10   1       7251.34       6951.11       461.38 o
   7  10   1        612.12        863.60       262.52 o
   8  10   1        510.66        678.29       298.06 o
   9  10   1       1361.11       1731.10       299.70 o
  10  10   1        218.75        209.30       293.58 o
  11  10   1       1245.01       1889.00       303.32 o
  12  10   1       1270.34       1639.96       300.57 o
  13  10   1        363.66        854.32       293.18 o
  14  10   1        408.16        762.79       286.66 o
  15  10   1        194.21        319.81       291.47 o
   1  11   1      11014.21      11397.92       399.93 o
   2  11   1       2638.19       3120.85       337.77 o
   3  11   1       4165.51       4321.04       345.87 o
   4  11   1         65.64        154.61       250.96 o
   5  11   1       3605.43       3767.14       274.01 o
   6  11   1       1912.91       2114.82       247.61 o
   7  11   1       1844.85       1460.57       240.26 o
   8  11   1        623.55        449.15       293.55 o
   9  11   1        414.78        503.38       287.97 o
  10  11   1        221.97       -146.56       295.21 o
  11  11   1        687.82        762.05       292.96 o
  12  11   1        196.38        391.19       398.96 o
  13  11   1        105.55        352.70       425.08 o
  14  11   1       2134.74       1799.83       405.31 o
  15  11   1        126.72       -144.41       322.52 o
   0  12   1      11554.27       8622.38       511.93 o
   1  12   1       4055.80       4543.97       371.82 o
   2  12   1       1367.76       1042.38       326.58 o
   3  12   1       5854.71       6546.59       284.30 o
   4  12   1       6529.21       6690.37       529.66 o
   5  12   1        937.80       1219.32       246.30 o
   6  12   1       4486.90       4941.76       265.61 o
   7  12   1        202.44        238.77       228.33 o
   8  12   1        216.15        297.38       280.21 o
   9  12   1       1152.52       1884.89       307.07 o
  10  12   1        627.73        734.96       278.23 o
  11  12   1       2990.00       7664.57      3207.35 o
  12  12   1         44.78        361.18       390.48 o
  13  12   1        601.95       1106.84       414.49 o
  14  12   1         27.83        186.87       287.22 o
  15  12   1        449.26        356.14       313.19 o
   1  13   1       2038.91       1992.37       314.54 o
   2  13   1       2872.50       3057.51       443.62 o
   3  13   1        331.87        510.93       249.41 o
   4  13   1        173.30         39.90       245.44 o
   5  13   1       2568.19       2942.84       281.36 o
   6  13   1        217.50        188.05       214.53 o
   7  13   1        873.39        744.87       215.96 o
   8  13   1        747.40        571.59       483.87 o
   9  13   1       1367.34       1597.19       300.43 o
  10  13   1          4.75       -146.17       283.04 o
  11  13   1        214.18        522.78       282.08 o
  12  13   1        180.49        392.95       409.55 o
  13  13   1        286.75        327.99       424.02 o
  14  13   1        548.99        221.70       291.72 o
   0  14   1       9152.64       9078.18       488.28 o
   1  14   1       2680.03       2832.34       251.96 o
   2  14   1       5722.43       6031.83       274.47 o
   3  14   1       2683.80       3221.35       341.70 o
   4  14   1       8508.00       9080.30       295.11 o
   5  14   1       3966.47       4559.89       262.95 o
   6  14   1       2015.14       2144.43       241.61 o
   7  14   1        501.57        262.96       244.50 o
   8  14   1        194.74        386.08       289.67 o
   9  14   1       1406.41       1573.11       282.35 o
  10  14   1         51.94       -268.83       268.83 o
  11  14   1       1424.15       1848.03       306.10 o
  12  14   1         52.71        193.83       409.90 o
  13  14   1        139.50        -12.00       404.60 o
  14  14   1        230.28        287.42       305.40 o
   1  15   1       1205.30       1313.27       217.67 o
   2  15   1        276.45        717.66       214.74 o
   3  15   1        657.04        623.02       246.69 o
   4  15   1        533.09        929.66       213.88 o
   5  15   1        286.90        408.32       227.31 o
   6  15   1        312.62        161.19       216.45 o
   7  15   1       2000.84       2024.38       214.65 o
   8  15   1        291.59        363.89       274.24 o
   9  15   1        108.10        614.67       380.24 o
  10  15   1        237.79        364.50       270.85 o
  11  15   1        275.29       -289.09       289.09 o
  12  15   1         14.20        392.25       387.30 o
  13  15   1         31.06        594.90       417.67 o
   0  16   1       5863.00       6659.66       337.26 o
   1  16   1        211.34        202.95       206.76 o
   2  16   1      12449.50      13303.20       270.33 o
   3  16   1        185.62        317.36       206.45 o
   4  16   1       5134.40       5155.55       246.48 o
   5  16   1        110.05        375.75       208.88 o
   6  16   1       3127.04       3676.34       246.02 o
   7  16   1         21.76         66.72       179.32 o
   8  16   1        541.01        893.53       277.60 o
   9  16   1       3504.35       3884.34       428.26 o
  10  16   1        199.12        667.63       412.02 o
  11  16   1       3135.14       2420.92       425.43 o
  13  16   1        857.60        177.94       413.08 o
   1  17   1         31.41       -106.33       225.66 o
   2  17   1         54.08        166.49       204.23 o
   3  17   1       2174.48       2253.10       239.34 o
   4  17   1        212.67        413.75       215.13 o
   5  17   1        161.05        493.38       243.98 o
   6  17   1          1.79       -104.56       204.35 o
   7  17   1       3225.27       2442.63       246.81 o
   8  17   1        359.98        378.12       396.48 o
   9  17   1        782.83        641.79       286.81 o
  10  17   1        163.68        426.85       395.07 o
  11  17   1         47.52        366.12       406.72 o
  12  17   1        164.85        254.91       429.67 o
   0  18   1       7092.45       7550.64       485.10 o
   1  18   1         59.77        139.64       217.26 o
   2  18   1       1573.49       1589.12       219.64 o
   3  18   1       1987.59       1925.31       219.60 o
   4  18   1       4502.23       4201.77       454.50 o
   5  18   1        386.58        387.67       208.06 o
   6  18   1       1107.30        984.59       248.40 o
   7  18   1       2180.48       2580.24       221.44 o
   8  18   1        346.39        321.27       345.10 o
   9  18   1        978.60        739.30       427.20 o
  10  18   1         37.99        -48.19       287.41 o
  11  18   1       1339.76        684.23       427.55 o
   1  19   1        101.36         81.94       203.83 o
   2  19   1        822.71        832.05       221.83 o
   3  19   1         19.40        103.00       208.46 o
   4  19   1        225.00        318.50       203.55 o
   5  19   1        150.76        305.13       260.89 o
   6  19   1        795.47        934.68       255.53 o
   7  19   1       1939.13       1267.44       220.50 o
   8  19   1        149.64        325.41       245.17 o
   9  19   1        217.99        273.62       402.84 o
  10  19   1        262.63        533.82       419.79 o
   0  20   1       1142.53       1576.59       344.03 o
   1  20   1        291.95        197.79       206.60 o
   2  20   1       1019.67       1011.31       208.22 o
   3  20   1       1159.37        833.44       213.16 o
   4  20   1        176.20        215.58       212.90 o
   5  20   1        375.27        466.28       208.44 o
   6  20   1         40.39         36.75       264.62 o
   7  20   1        171.17        149.44       194.43 o
   8  20   1          4.94        157.21       276.64 o
   9  20   1        971.86       1165.80       456.50 o
   1  21   1        586.69        608.43       204.53 o
   2  21   1        803.37        684.11       207.86 o
   3  21   1        232.54        315.73       205.51 o
   4  21   1        996.89       1033.32       212.23 o
   5  21   1         99.68        169.65       354.70 o
   6  21   1        155.47         13.67       222.28 o
   7  21   1         43.23         92.58       223.90 o
   8  21   1          6.97       -182.30       328.42 o
   0  22   1        288.71       -124.77       296.32 o
   1  22   1          6.87        334.08       205.95 o
   2  22   1         50.25        276.57       209.52 o
   3  22   1       1277.63       1233.03       215.78 o
   4  22   1       1110.76       1138.59       210.34 o
   5  22   1        104.75       -107.90       231.58 o
   6  22   1        291.42        148.89       276.07 o
   1  23   1       2022.74       1731.66       339.49 o
   2  23   1         65.48        119.86       215.02 o
   3  23   1        159.96        349.48       245.81 o
   4  23   1       1051.88        738.66       259.17 o
   1   0   2        115.57        121.23       357.78 o
   2   0   2       6554.69       6261.10       590.84 o
   3   0   2      16578.31      14939.65      1640.48 o
   4   0   2     144261.50     143023.69      1153.87 o
   5   0   2       4074.33       3340.84       313.68 o
   6   0   2      98338.79      98090.79       687.79 o
   7   0   2      20446.10      20377.21       403.64 o
   8   0   2      14056.58      13573.03       412.16 o
   9   0   2       1058.20       1315.51       343.86 o
  10   0   2         20.48        299.57       356.94 o
  11   0   2       5993.66       5959.38       466.06 o
  12   0   2        163.70        138.79       341.00 o
  13   0   2         65.05         32.54       288.10 o
  14   0   2         14.59        196.16       276.74 o
  15   0   2       9300.98       9104.39       358.38 o
  16   0   2       1167.22        866.66       347.47 o
  17   0   2        776.11        318.31       433.38 o
   1   1   2       5057.32       4528.92       349.61 o
   2   1   2       9290.44       9293.78       418.52 o
   3   1   2      14164.43      12727.77       433.04 o
   4   1   2      64226.69      61733.53      1161.36 o
   5   1   2       8429.13       7682.09       270.43 o
   6   1   2       5141.13       5267.15       228.95 o
   7   1   2       6081.19       6533.85       235.95 o
   8   1   2        264.05        381.24       217.20 o
   9   1   2       4422.56       4070.68       231.37 o
  10   1   2       2547.70       2604.07       221.94 o
  11   1   2       1018.61       1005.69       215.60 o
  12   1   2       1664.70       1407.32       218.58 o
  13   1   2       2114.24       2326.28       216.35 o
  14   1   2       1105.96       1092.83       205.38 o
  15   1   2        351.93        471.50       203.02 o
  16   1   2         14.14       -157.50       200.97 o
  17   1   2        407.67        199.23       217.12 o
   0   2   2        534.87        593.88       400.98 o
   1   2   2      12034.31      11585.09       450.08 o
   2   2   2      89401.00      73188.00      8098.74 o
   3   2   2      27025.11      24713.02       475.95 o
   4   2   2     116140.13     100066.28     11250.24 o
   5   2   2      26469.07      23477.90       910.16 o
   6   2   2       1949.21       2019.52       219.23 o
   7   2   2      44655.90      46850.07       407.52 o
   8   2   2       6386.75       7138.44       245.78 o
   9   2   2       1705.09       1504.04       214.58 o
  10   2   2         15.63       -144.86       201.55 o
  11   2   2       1767.59       1814.87       230.85 o
  12   2   2        764.65       1070.75       235.45 o
  13   2   2       3414.85       4107.41       246.61 o
  14   2   2        394.15        553.89       232.91 o
  15   2   2       4537.16       4377.76       237.58 o
  16   2   2          4.55        -86.72       206.37 o
  17   2   2       1524.57       1319.16       243.65 o
   1   3   2       3570.46       3458.77       380.41 o
   2   3   2      44046.91      41897.04       773.02 o
   3   3   2      27712.07      26438.88       457.13 o
   4   3   2      23783.10      23513.72       456.09 o
   5   3   2       6627.17       6399.36       262.04 o
   6   3   2      10671.27      10594.49       290.02 o
   7   3   2        392.26        473.39       217.73 o
   8   3   2        218.89        377.08       200.00 o
   9   3   2          3.51        217.12       237.79 o
  10   3   2        748.79       1065.98       258.52 o
  11   3   2        692.34        698.48       217.54 o
  12   3   2        343.36        574.69       229.33 o
  13   3   2       1426.38       1453.29       212.64 o
  14   3   2        168.19        323.11       201.40 o
  15   3   2        428.38        330.50       207.65 o
  16   3   2         29.39        140.59       202.71 o
  17   3   2        183.13        196.09       216.40 o
   0   4   2       7426.76       7303.36       547.10 o
   1   4   2       5502.73       4567.09       415.94 o
   2   4   2       1915.94       1498.89       367.91 o
   3   4   2         32.88        197.71       304.64 o
   4   4   2      12491.52      12001.86       559.56 o
   5   4   2      11293.32      10572.29       534.83 o
   6   4   2       8787.58       8294.87       294.87 o
   7   4   2       3117.25       2900.35       236.00 o
   8   4   2       1993.41       1909.44       208.29 o
   9   4   2      12827.50      11203.82       292.49 o
  10   4   2         19.91         86.57       218.53 o
  11   4   2       1912.00       1994.18       236.55 o
  12   4   2       1062.36        812.26       330.93 o
  13   4   2       1235.48       1344.67       217.70 o
  14   4   2          0.41        303.70       255.49 o
  15   4   2       3386.90       3010.76       242.20 o
  16   4   2        957.56        623.25       214.85 o
  17   4   2        171.24        235.34       217.26 o
   1   5   2      20408.04      20198.17       580.02 o
   2   5   2       1693.09       1615.97       548.63 o
   3   5   2      12340.75      11027.60      3490.86 o
   4   5   2        553.51        486.47       412.85 o
   5   5   2       3846.24       4124.74       450.43 o
   6   5   2       4855.38       5109.11       301.31 o
   7   5   2       2132.37       2151.41       243.65 o
   8   5   2       3677.59       3782.34       232.24 o
   9   5   2       4967.88       4727.24       561.59 o
  10   5   2       1743.69       1623.10       221.91 o
  11   5   2        919.06        847.00       212.07 o
  12   5   2         84.10        129.91       204.56 o
  13   5   2       1449.05       1203.50       230.03 o
  14   5   2        175.29        306.55       205.38 o
  15   5   2        846.74        761.78       208.92 o
  16   5   2          0.34        215.09       235.87 o
  17   5   2         73.41         67.84       236.30 o
   0   6   2       7223.80       7509.19       628.80 o
   1   6   2        531.69        716.06       433.41 o
   2   6   2      11724.02      10849.02       473.14 o
   3   6   2         55.54        263.05       397.44 o
   4   6   2       3061.91       2862.54       390.96 o
   5   6   2        529.62        549.43       377.42 o
   6   6   2       8464.81       8415.50       808.78 o
   7   6   2      15661.02      15821.66       488.96 o
   8   6   2        144.61        189.75       262.71 o
   9   6   2       8121.30       8685.57       253.70 o
  10   6   2       2846.63       2943.00       257.69 o
  11   6   2       5527.30       5245.65       611.39 o
  12   6   2         27.11       -164.74       206.53 o
  13   6   2       1078.31       1074.27       213.84 o
  14   6   2        982.77       1136.87       229.82 o
  15   6   2        251.82        243.60       224.72 o
  16   6   2         38.23        181.26       218.32 o
   1   7   2      14716.29      12977.40       457.38 o
   2   7   2          0.22        232.87       403.28 o
   3   7   2       8537.30       7901.16       473.52 o
   4   7   2       1359.87       1784.98       436.05 o
   5   7   2      12130.20      12432.64       498.60 o
   6   7   2        238.42        433.14       266.03 o
   7   7   2       5941.91       5946.50       289.15 o
   8   7   2       1206.01       1336.95       248.39 o
   9   7   2          8.34        210.53       234.82 o
  10   7   2         46.14       -171.81       309.56 o
  11   7   2         67.35        564.47       352.00 o
  12   7   2       3277.91       4103.59       432.85 o
  13   7   2         52.03          5.31       259.67 o
  14   7   2          0.52         31.34       283.91 o
  15   7   2         65.96        163.24       281.54 o
  16   7   2         61.44        115.14       320.58 o
   0   8   2       2956.08       2759.15       504.17 o
   1   8   2       2941.36       3241.49       374.84 o
   2   8   2       6022.59       5995.18       405.37 o
   3   8   2        295.63       -400.12       406.54 o
   4   8   2       5824.87       5613.11       420.85 o
   5   8   2       8155.56       6347.99      2082.86 o
   6   8   2         29.31        175.38       250.11 o
   7   8   2       3058.51       3096.74       268.29 o
   8   8   2       1591.40       2198.05       350.95 o
   9   8   2       1549.98       1568.41       377.75 o
  10   8   2        510.85        735.37       306.92 o
  11   8   2       5230.83       4892.11       312.06 o
  12   8   2        154.60        254.11       280.43 o
  13   8   2       3020.65       2839.73       306.68 o
  14   8   2          5.36       -110.66       283.28 o
  15   8   2       3586.04       3659.25       306.15 o
  16   8   2         81.49         72.31       299.45 o
   1   9   2        213.40        493.83       373.08 o
   2   9   2      45068.02      44833.12      7074.40 o
   3   9   2        618.72        961.41       352.55 o
   4   9   2        756.14        572.17       339.72 o
   5   9   2      13692.80      12258.25      1465.44 o
   6   9   2        494.47        625.88       263.26 o
   7   9   2       1854.13       2100.42       301.22 o
   8   9   2       1275.53       1088.41       350.11 o
   9   9   2        926.74        526.27       292.80 o
  10   9   2        100.70        174.92       282.08 o
  11   9   2       1699.00       1949.55       305.44 o
  12   9   2       2060.87       2582.88       314.17 o
  13   9   2        326.20         45.70       384.13 o
  14   9   2         13.51        294.22       268.74 o
  15   9   2         33.08        345.16       345.76 o
  16   9   2         14.52        242.64       299.80 o
   0  10   2         31.92        486.16       509.46 o
   1  10   2       2806.30       3059.17       377.14 o
   2  10   2       3045.83       2921.29       356.46 o
   3  10   2       3145.37       3604.56       364.13 o
   4  10   2      22976.45      24636.62       522.37 o
   5  10   2       8244.07       7844.91       447.50 o
   6  10   2         47.42        180.83       263.98 o
   7  10   2       5040.40       4941.45       291.66 o
   8  10   2         31.91        217.40       261.89 o
   9  10   2       1234.63       1149.57       293.49 o
  10  10   2       2381.88       2550.49       489.51 o
  11  10   2      12511.20      13565.93       845.22 o
  12  10   2        524.87       1082.83       430.38 o
  13  10   2       2127.75       2813.87       410.96 o
  14  10   2        316.06        514.03       327.57 o
  15  10   2       1966.12        851.54       494.10 o
   1  11   2        784.84        816.07       380.19 o
   2  11   2      11205.03      11649.76      1136.14 o
   3  11   2      11486.32      11181.46       384.54 o
   4  11   2       8206.19       8604.76       448.16 o
   5  11   2       2438.79       2620.39       377.31 o
   6  11   2        632.46       1124.49       279.12 o
   7  11   2       3336.11       3188.85       281.27 o
   8  11   2        486.20        845.74       262.95 o
   9  11   2        190.44        338.77       287.71 o
  10  11   2       2669.04       3542.53       310.44 o
  11  11   2       1164.84       1369.51       427.20 o
  12  11   2        196.66        121.10       412.72 o
  13  11   2        251.81        601.71       325.34 o
  14  11   2        257.00        362.59       291.81 o
  15  11   2        868.24       1045.66       541.06 o
   0  12   2          9.18        111.21       418.73 o
   1  12   2        701.13        639.11       307.98 o
   2  12   2       1221.00       1601.83       308.44 o
   3  12   2         13.52        388.20       465.51 o
   4  12   2       1282.23       1804.28       312.77 o
   5  12   2          9.48        189.22       242.01 o
   6  12   2        356.48        430.59       206.94 o
   7  12   2       2065.14       2301.32       251.39 o
   8  12   2        113.93        -76.03       223.93 o
   9  12   2        114.21        694.59       282.90 o
  10  12   2       1387.65       1799.63       292.57 o
  11  12   2      11338.76      11690.45       494.99 o
  12  12   2       3322.61       3104.12       365.41 o
  13  12   2        632.99        455.20       290.66 o
  14  12   2         10.06       -173.68       293.77 o
  15  12   2        672.83        324.73       320.75 o
   1  13   2      32861.99      34747.14       493.71 o
   2  13   2        751.00        847.29       288.98 o
   3  13   2       1645.99       1708.48       358.75 o
   4  13   2        527.70        624.80       347.79 o
   5  13   2       6286.15       5992.09       763.76 o
   6  13   2        229.83        360.07       242.45 o
   7  13   2       1526.80       1819.93       276.64 o
   8  13   2         30.23        -51.36       234.69 o
   9  13   2         58.72        -27.85       291.94 o
  10  13   2       1776.99       1950.38       366.83 o
  11  13   2          1.29       -206.89       386.60 o
  12  13   2        901.86        613.05       418.73 o
  13  13   2         13.91        558.33       292.07 o
  14  13   2        242.32        -58.41       304.44 o
   0  14   2       3516.30       4377.21       631.97 o
   1  14   2          0.54        100.62       293.51 o
   2  14   2        924.53        576.79       353.67 o
   3  14   2       1215.84       1233.51       309.66 o
   4  14   2        210.72        333.62       248.67 o
   5  14   2       4058.48       3852.50       531.82 o
   6  14   2       2082.10       2430.21       258.57 o
   7  14   2        280.03        379.70       276.87 o
   8  14   2       1049.97        471.00       268.88 o
   9  14   2          4.03        284.25       269.36 o
  10  14   2        376.02        599.39       269.64 o
  11  14   2       1802.33       1952.06       420.49 o
  12  14   2        415.66        587.49       426.49 o
  13  14   2         70.53       -138.41       292.99 o
  14  14   2         18.93       -303.97       303.97 o
   1  15   2      13353.34      13860.39       387.46 o
   2  15   2        690.94        927.79       326.05 o
   3  15   2      19226.87      20027.34       469.98 o
   4  15   2        532.76        474.24       247.00 o
   5  15   2       3939.63       4082.81       270.63 o
   6  15   2          6.68          1.20       210.20 o
   7  15   2       2717.41       2418.43       345.10 o
   8  15   2        285.21        279.76       284.59 o
   9  15   2        529.39        996.68       387.66 o
  10  15   2         37.22       -197.71       383.07 o
  13  15   2        316.31        451.78       297.42 o
   0  16   2       1203.94       1553.10       417.31 o
   1  16   2         18.86        262.79       237.40 o
   2  16   2        213.64        418.72       239.54 o
   3  16   2       2388.86       2674.46       462.67 o
   4  16   2        325.37        606.55       214.18 o
   5  16   2        204.20        181.23       227.63 o
   6  16   2         14.30        163.99       208.96 o
   7  16   2       1216.39       1174.43       195.19 o
   8  16   2          6.09         81.88       219.42 o
   9  16   2         83.91       -247.14       407.08 o
  10  16   2        360.24       -148.64       391.89 o
  11  16   2        179.04       -306.10       397.54 o
   1  17   2      10575.58      11099.69       274.44 o
   2  17   2         29.08        365.41       202.48 o
   3  17   2      11649.67      11422.17       666.74 o
   4  17   2        268.15        334.34       205.69 o
   5  17   2       5050.88       5298.29       699.53 o
   6  17   2       1222.07       1331.17       247.25 o
   7  17   2        709.20        722.36       203.71 o
   8  17   2        193.13        -28.27       262.80 o
   9  17   2        482.42       1277.36       404.60 o
  10  17   2        143.30       -115.45       388.01 o
  11  17   2        104.23        656.09       282.59 o
   0  18   2        114.66        112.55       356.06 o
   1  18   2        112.66        203.06       219.62 o
   2  18   2         50.28        224.01       202.70 o
   3  18   2         54.32        155.92       255.10 o
   4  18   2       1452.26       1365.32       250.47 o
   5  18   2         31.92        147.65       206.54 o
   6  18   2         42.56        -17.95       241.77 o
   7  18   2        477.57        508.48       194.76 o
   8  18   2         75.39        -13.45       211.28 o
   9  18   2        465.57        119.33       396.84 o
  11  18   2          3.79        171.36       290.94 o
   1  19   2       2565.53       2874.23       395.85 o
   2  19   2        603.06        483.90       204.17 o
   3  19   2       4089.62       4453.09       255.92 o
   4  19   2        208.75        402.12       202.88 o
   5  19   2       1949.09       2257.15       217.23 o
   6  19   2        227.03        428.51       209.28 o
   7  19   2       1415.50       1403.42       194.84 o
   8  19   2          4.94       -174.49       281.43 o
   9  19   2        510.94        163.08       396.13 o
   0  20   2       1877.64       2161.68       306.58 o
   1  20   2       1502.30       1537.26       223.71 o
   2  20   2       2531.18       2785.73       243.03 o
   3  20   2        959.84       1025.01       306.31 o
   4  20   2          8.60        -97.63       217.46 o
   5  20   2        368.99        299.44       212.84 o
   6  20   2         19.76         89.88       218.39 o
   7  20   2         71.42        108.02       219.66 o
   8  20   2        370.77        345.87       231.86 o
   1  21   2       1056.14       1063.34       214.57 o
   2  21   2        420.66        609.99       198.26 o
   3  21   2       2898.08       2824.04       227.05 o
   4  21   2        751.62        462.81       270.84 o
   5  21   2       1206.59       1108.70       223.93 o
   6  21   2         75.83         16.07       270.52 o
   7  21   2       1326.13       1278.20       231.26 o
   8  21   2         23.32        -13.35       324.13 o
   0  22   2          0.71        167.48       289.89 o
   1  22   2       1257.38        951.37       267.49 o
   2  22   2        516.23        367.81       212.66 o
   3  22   2        224.66        118.37       207.86 o
   4  22   2         38.28        184.94       223.99 o
   5  22   2        385.40        562.17       250.86 o
   6  22   2         71.69        121.25       211.54 o
   1  23   2        264.44        164.25       213.55 o
   2  23   2         37.03        253.39       245.12 o
   3  23   2       2082.08       1761.31       255.86 o
   4  23   2        191.55        126.62       213.69 o
   1   1   3      88548.65      86473.74       785.23 o
   2   1   3      40746.50      38214.14       573.26 o
   3   1   3       1910.76       1722.36       340.09 o
   4   1   3      68153.83      66503.86       568.29 o
   5   1   3      16990.22      15241.18       326.15 o
   6   1   3      13260.75      12374.14       530.95 o
   7   1   3      32029.18      32532.96       329.96 o
   8   1   3       2187.67       1990.47       185.79 o
   9   1   3       1369.81       1247.98       189.94 o
  10   1   3        729.01        890.86       229.95 o
  11   1   3        102.79        315.05       210.77 o
  12   1   3       1592.91       1823.06       216.14 o
  13   1   3        827.99        691.62       207.72 o
  14   1   3       2167.13       2158.44       212.03 o
  15   1   3       1424.27       1208.03       214.15 o
  16   1   3        665.85        603.52       208.26 o
  17   1   3         44.88         57.67       215.60 o
   0   2   3        103.15         62.09       450.14 o
   1   2   3       5483.52       4947.01       386.23 o
   2   2   3        851.16        651.14       307.74 o
   3   2   3      17337.58      14768.11      1062.81 o
   4   2   3      64535.02      61375.50       771.63 o
   5   2   3       1573.64       1722.79       233.63 o
   6   2   3       6507.66       6764.83       259.54 o
   7   2   3       5848.30       6063.28       259.38 o
   8   2   3        270.34        475.66       194.46 o
   9   2   3       4040.57       3980.30       215.47 o
  10   2   3        831.69        695.86       207.20 o
  11   2   3       1309.45       1357.22       216.78 o
  12   2   3         50.13         51.26       206.36 o
  13   2   3        360.74        411.87       225.41 o
  14   2   3          0.30        216.96       195.38 o
  15   2   3         98.86        155.20       195.30 o
  16   2   3        142.00       -138.32       208.57 o
  17   2   3         10.63       -214.75       214.75 o
   1   3   3     111797.35     103794.30      2271.67 o
   2   3   3        463.97        702.66       307.56 o
   3   3   3      96088.35      88870.80      2352.13 o
   4   3   3       2891.25       2826.01       308.66 o
   5   3   3       1490.46       1493.83       234.76 o
   6   3   3       9132.44       8209.14       597.57 o
   7   3   3       8073.94       7907.76       234.13 o
   8   3   3        733.62        733.44       199.15 o
   9   3   3       3753.33       3572.90       286.50 o
  10   3   3       1871.43       1884.82       216.37 o
  11   3   3         32.23         85.82       198.26 o
  12   3   3       2218.16       2470.15       236.58 o
  13   3   3         58.10        219.29       221.03 o
  14   3   3        606.10        465.52       222.37 o
  15   3   3        215.41        141.49       216.73 o
  16   3   3        328.20        159.86       211.39 o
  17   3   3        110.41        197.68       211.82 o
   0   4   3       3800.94       4028.77       511.48 o
   1   4   3      10012.54       7655.25       852.76 o
   2   4   3      18791.78      16310.78      1085.90 o
   3   4   3       9589.00       9295.06       370.12 o
   4   4   3         50.65        -50.81       316.51 o
   5   4   3       3489.97       3635.59       255.29 o
   6   4   3      10845.57      10250.68       290.83 o
   7   4   3        267.93        239.00       233.29 o
   8   4   3       4038.60       4655.95       239.85 o
   9   4   3       2600.08       2635.31       199.57 o
  10   4   3        606.91        588.62       187.47 o
  11   4   3       2627.15       2740.96       234.85 o
  12   4   3         79.94         29.87       211.93 o
  13   4   3       1717.96       1589.43       236.90 o
  14   4   3       1089.16       1007.75       270.73 o
  15   4   3        263.16        433.43       212.72 o
  16   4   3        147.53        269.11       206.97 o
  17   4   3        144.42         72.42       216.01 o
   1   5   3         89.95        184.51       291.72 o
   2   5   3       3321.75       2974.11       359.57 o
   3   5   3      18369.21      19526.62       445.18 o
   4   5   3       4044.40       3631.63       306.15 o
   5   5   3        299.98        127.16       362.09 o
   6   5   3       4821.94       4708.45       334.53 o
   7   5   3       1096.44       1053.92       270.70 o
   8   5   3       2531.52       2266.66       226.49 o
   9   5   3        111.15        110.72       186.67 o
  10   5   3        517.24        523.78       192.71 o
  11   5   3         74.68        182.76       211.89 o
  12   5   3       3336.92       3414.34       234.49 o
  13   5   3        138.22        -62.27       222.21 o
  14   5   3       1637.92       1746.43       216.29 o
  15   5   3         85.96         69.78       204.39 o
  16   5   3        263.74        220.22       212.40 o
  17   5   3        206.80         24.11       221.67 o
   0   6   3       8735.50       8611.08       638.33 o
   1   6   3        596.18        549.10       363.33 o
   2   6   3       4994.83       4622.35       438.65 o
   3   6   3       8339.67       8253.46       446.77 o
   4   6   3       8079.43       7351.16       440.08 o
   5   6   3       1294.55       1501.44       390.69 o
   6   6   3         35.96        169.80       352.51 o
   7   6   3        655.24        523.95       330.00 o
   8   6   3       3472.48       3729.17       264.72 o
   9   6   3       2196.12       2290.90       374.57 o
  10   6   3       1498.10       1464.10       202.39 o
  11   6   3        456.27        519.91       223.64 o
  12   6   3       2852.38       3305.21       531.42 o
  13   6   3       4131.95       4024.00       248.02 o
  14   6   3          2.23         38.67       207.92 o
  15   6   3       1166.27       1033.75       217.94 o
  16   6   3        880.45        770.76       230.18 o
   1   7   3      14982.43      13219.53       456.70 o
   2   7   3       1230.24       1037.77       364.11 o
   3   7   3      50477.11      45281.20      3869.34 o
   4   7   3        835.04        830.76       383.05 o
   5   7   3      27613.12      27459.96       549.01 o
   6   7   3        237.94        332.39       378.20 o
   7   7   3      20191.69      16914.65      4756.92 o
   8   7   3         90.71        -46.28       250.38 o
   9   7   3       1556.50       1525.21       334.86 o
  10   7   3        142.17        407.67       272.29 o
  11   7   3        473.99        747.54       285.18 o
  12   7   3       1453.18       1342.52       290.18 o
  13   7   3        328.73        125.16       281.20 o
  14   7   3        167.96        450.15       389.07 o
  15   7   3        120.54         89.39       314.22 o
  16   7   3          4.04        543.07       343.73 o
   0   8   3         12.72         73.79       475.22 o
   1   8   3        157.22        137.35       407.63 o
   2   8   3       2740.61       2564.09       372.47 o
   3   8   3         31.82         -8.61       362.61 o
   4   8   3       1344.01       1093.86       414.77 o
   5   8   3       1812.52       1770.65       355.69 o
   6   8   3        547.16        436.76       349.38 o
   7   8   3       1332.66       1300.07       253.23 o
   8   8   3         39.99        208.17       274.25 o
   9   8   3         16.60        -10.20       241.65 o
  10   8   3          5.20        107.67       248.28 o
  11   8   3       6072.46       6617.11       315.22 o
  12   8   3        534.45        764.99       334.35 o
  13   8   3        419.26        304.07       316.88 o
  14   8   3        659.20        224.56       285.41 o
  15   8   3        209.99        273.20       288.97 o
  16   8   3        778.16        496.65       340.35 o
   1   9   3       6899.32       5940.16       410.14 o
   2   9   3       3132.12       2944.23       366.96 o
   3   9   3        297.38        432.20       347.39 o
   4   9   3       4381.14       4903.67       421.98 o
   5   9   3      21647.85      19925.30      1467.31 o
   6   9   3        684.57        809.33       316.92 o
   7   9   3         12.79          2.38       264.97 o
   8   9   3        422.52        823.51       263.44 o
   9   9   3        687.60        749.87       268.45 o
  10   9   3        557.94        958.85       297.21 o
  11   9   3       3440.64       3439.92       309.76 o
  12   9   3        769.02        871.80       278.32 o
  13   9   3        808.21        816.42       282.28 o
  14   9   3       1117.14       1235.14       320.68 o
  15   9   3          0.96       -301.55       301.55 o
  16   9   3         84.09        396.12       299.23 o
   0  10   3       4980.52       4385.33       522.17 o
   1  10   3       5191.24       5588.42       384.70 o
   2  10   3       1050.91        738.22       331.55 o
   3  10   3      21869.62      21169.34      1574.64 o
   4  10   3         31.40         25.46       369.23 o
   5  10   3       7605.62       8053.62       420.70 o
   6  10   3       5365.26       5311.65       390.75 o
   7  10   3       2906.67       3101.58       394.85 o
   8  10   3       4898.45       4760.66       275.26 o
   9  10   3      10989.50      11854.48       964.94 o
  10  10   3        565.54        748.18       293.52 o
  11  10   3       2415.55       2608.94       310.56 o
  12  10   3          0.52        169.11       419.79 o
  13  10   3         67.38        259.14       378.12 o
  14  10   3        396.28        728.59       445.21 o
  15  10   3        341.59        149.00       293.03 o
   1  11   3       3883.79       3677.17       336.99 o
   2  11   3        738.07        994.07       321.93 o
   3  11   3      21649.61      20675.97       684.58 o
   4  11   3       1459.82       1238.92       331.94 o
   5  11   3        608.32        938.93       605.49 o
   6  11   3       8795.78       9122.01       460.21 o
   7  11   3       3591.86       3502.67       308.74 o
   8  11   3       2006.40       1944.89       249.19 o
   9  11   3       2834.46       2766.66       353.90 o
  10  11   3          3.75        247.44       359.06 o
  11  11   3          2.64       -159.23       387.66 o
  12  11   3        484.30        461.93       307.51 o
  13  11   3       1535.64       1349.75       289.64 o
  14  11   3         87.55        -23.21       390.13 o
  15  11   3        252.60       -154.73       347.23 o
   0  12   3         16.92        342.82       419.08 o
   1  12   3       2064.60       2219.50       316.23 o
   2  12   3       1768.50        915.24       507.70 o
   3  12   3       1219.82       1604.05       337.31 o
   4  12   3       7059.54       7323.54       362.04 o
   5  12   3       1823.36       1794.50       437.59 o
   6  12   3       5700.85       6193.96       292.47 o
   7  12   3       2264.07       2577.58       416.81 o
   8  12   3         96.18        122.38       229.24 o
   9  12   3        938.85       1094.57       290.82 o
  10  12   3        404.25        477.08       342.47 o
  11  12   3       4609.40       5622.63       328.00 o
  12  12   3        209.46       -290.97       290.97 o
  13  12   3        315.36        299.85       290.02 o
  14  12   3          7.36        110.10       283.13 o
  15  12   3        246.15        320.69       538.41 o
   1  13   3       4712.89       5281.61       332.99 o
   2  13   3        805.84       1020.15       300.33 o
   3  13   3          8.49       -145.09       336.22 o
   4  13   3         53.62        -33.52       300.41 o
   5  13   3       3755.85       3766.64       384.30 o
   6  13   3        765.88        628.53       252.15 o
   7  13   3        539.65        684.83       236.99 o
   8  13   3        122.60         82.80       238.23 o
   9  13   3          4.52       -106.16       275.98 o
  10  13   3        482.46        962.23       288.90 o
  11  13   3         42.38         48.81       281.39 o
  12  13   3         26.60        296.91       291.08 o
  13  13   3        510.60        -14.44       309.81 o
  14  13   3         50.98        244.00       470.98 o
   0  14   3        358.71       -168.41       401.78 o
   1  14   3        169.39        303.81       296.56 o
   2  14   3        133.05        230.93       303.45 o
   3  14   3       2922.64       3095.91       312.81 o
   4  14   3      10714.48      11522.32       388.00 o
   5  14   3       5179.16       5696.08       269.57 o
   6  14   3       2675.38       2969.75       267.24 o
   7  14   3       1628.59       1931.59       313.41 o
   8  14   3        240.09        343.80       292.41 o
   9  14   3       3493.80       3091.37       434.26 o
  10  14   3        998.19        979.74       394.01 o
  12  14   3          0.52        355.88       394.72 o
  13  14   3        400.04       -157.83       405.66 o
  14  14   3          0.90        188.61       306.32 o
   1  15   3       1058.54       1505.08       310.78 o
   2  15   3       1657.41       1752.75       322.20 o
   3  15   3       2695.23       2730.70       354.43 o
   4  15   3        161.11        169.46       296.27 o
   5  15   3        120.31         78.75       252.19 o
   6  15   3          0.47       -126.86       260.97 o
   7  15   3        141.68         -2.60       240.53 o
   8  15   3        311.26        148.31       263.80 o
   9  15   3        272.60        477.24       274.34 o
  10  15   3         53.27        469.92       395.42 o
  12  15   3         66.01       -136.28       423.32 o
  13  15   3         17.40        163.16       341.42 o
   0  16   3       6568.41       7753.15       503.46 o
   1  16   3         22.08        302.64       299.64 o
   2  16   3       6017.35       5687.08       338.77 o
   3  16   3        628.39        692.10       321.11 o
   4  16   3        648.32       1243.59       251.48 o
   5  16   3       1739.33       2052.77       253.02 o
   6  16   3       2595.98       2579.72       264.61 o
   7  16   3       3435.95       3251.41       274.98 o
   8  16   3        307.35        186.31       204.98 o
   9  16   3        742.80       1031.43       539.83 o
  10  16   3        213.04        162.80       389.78 o
  11  16   3        993.35        990.68       397.54 o
  12  16   3        338.29        342.82       415.55 o
   1  17   3        833.75        691.88       292.17 o
   2  17   3         30.47         -7.24       234.10 o
   3  17   3        603.38        708.83       242.82 o
   4  17   3        119.30        299.81       255.60 o
   5  17   3          0.07        285.69       241.44 o
   6  17   3        553.36        616.91       216.77 o
   7  17   3       1262.16        823.73       252.85 o
   8  17   3        440.76        303.36       264.13 o
  10  17   3       2065.07       2180.13       408.13 o
  11  17   3         46.32       -183.94       400.37 o
  12  17   3         18.58        507.34       434.61 o
   0  18   3        508.59        731.73       288.73 o
   1  18   3        221.85        338.74       245.93 o
   2  18   3        127.05        424.46       222.01 o
   3  18   3        533.24        518.66       202.20 o
   4  18   3        929.47       1189.38       242.03 o
   5  18   3       2823.89       2659.78       230.44 o
   6  18   3       1189.34       1011.98       245.70 o
   7  18   3        725.83        311.16       222.95 o
   8  18   3         12.95        -66.06       226.39 o
   9  18   3       2702.18       3440.76       315.42 o
  10  18   3        402.31        285.62       400.72 o
  11  18   3       1352.18       1271.20       297.54 o
   1  19   3        670.84        904.69       207.16 o
   2  19   3        236.88        264.66       199.51 o
   3  19   3         56.26         11.71       198.27 o
   4  19   3        564.46        327.26       222.45 o
   5  19   3        838.85       1033.13       231.05 o
   6  19   3         43.12        182.23       208.48 o
   7  19   3        417.73        415.92       192.32 o
   8  19   3         52.35        105.57       322.78 o
   9  19   3          0.11        251.73       426.49 o
  10  19   3       1483.59       1599.35       420.49 o
   0  20   3       2263.26       2056.05       303.05 o
   1  20   3        974.64        785.87       207.79 o
   2  20   3       3185.93       2595.55       222.04 o
   3  20   3        281.53         22.75       297.79 o
   4  20   3        304.11        177.25       201.10 o
   5  20   3        788.78        788.92       244.22 o
   6  20   3         79.08         49.41       224.48 o
   7  20   3       1169.56       1027.76       327.00 o
   8  20   3        332.44        175.80       252.95 o
   1  21   3         23.91        173.99       205.34 o
   2  21   3        558.83        779.16       202.46 o
   3  21   3        591.31        613.92       209.43 o
   4  21   3        285.45        496.24       244.42 o
   5  21   3        162.74         19.30       204.84 o
   6  21   3        370.22        114.53       443.09 o
   7  21   3        198.79         25.98       206.76 o
   8  21   3        150.72        -77.16       265.26 o
   0  22   3       1659.14       1373.78       553.59 o
   1  22   3          1.22        198.32       242.77 o
   2  22   3       1000.55       1306.41       222.64 o
   3  22   3        399.69        379.02       294.19 o
   4  22   3       1168.55       1064.66       247.29 o
   5  22   3        551.86        364.07       244.42 o
   6  22   3        356.78        482.08       221.85 o
   1  23   3       1282.54        676.07       216.89 o
   2  23   3         77.09         29.89       246.78 o
   3  23   3        314.87         84.37       225.55 o
   4  23   3        111.91        159.57       213.89 o
   0   0   4      35693.89      37608.07      1191.22 o
   1   0   4          3.07        292.33       464.00 o
   2   0   4     202260.22     200100.64      1505.26 o
   3   0   4      23388.66      22889.02       642.44 o
   4   0   4     344202.59     349392.97      3707.28 o
   5   0   4       2683.03       2884.44       409.26 o
   6   0   4       1926.80       1874.73       382.96 o
   7   0   4       4519.76       4846.67       318.68 o
   8   0   4        965.39        928.04       256.47 o
   9   0   4        530.39        340.97       288.52 o
  10   0   4      10074.08      10847.71       329.67 o
  11   0   4        336.44       -200.08       308.66 o
  12   0   4       3320.26       3480.97       310.19 o
  13   0   4        678.00        577.83       306.45 o
  14   0   4        153.86        225.66       332.25 o
  15   0   4       2444.27       1855.24       304.05 o
  16   0   4        762.89        315.91       306.07 o
  17   0   4         65.07        134.74       302.93 o
   1   1   4       8086.37       7485.10       363.61 o
   2   1   4      26202.99      22811.15       573.45 o
   3   1   4       4816.31       4367.87       371.08 o
   4   1   4          5.91        -16.67       272.65 o
   5   1   4        539.02        357.17       245.63 o
   6   1   4        754.48        910.63       274.10 o
   7   1   4        709.71        810.45       226.72 o
   8   1   4       4227.74       4475.01       207.74 o
   9   1   4          4.02        -14.55       169.27 o
  10   1   4        645.71        612.39       191.75 o
  11   1   4       1074.31       1276.93       216.47 o
  12   1   4         35.40        220.56       207.12 o
  13   1   4        284.70        126.59       234.36 o
  14   1   4        126.90        370.32       197.93 o
  15   1   4         36.82        264.66       198.62 o
  16   1   4         43.61        235.40       206.04 o
  17   1   4         46.05        -10.00       216.39 o
   0   2   4        924.65        993.61       504.01 o
   1   2   4       4827.06       4240.03       378.06 o
   2   2   4      20978.29      20242.94       414.23 o
   3   2   4       1337.88       1388.54       343.57 o
   4   2   4      26022.09      25846.16       404.30 o
   5   2   4       5589.04       5749.61       276.46 o
   6   2   4      21247.21      20511.84       325.64 o
   7   2   4       6813.00       6951.24       258.80 o
   8   2   4        552.55        540.38       181.66 o
   9   2   4        876.52        905.63       172.20 o
  10   2   4         34.34        207.99       194.66 o
  11   2   4       3776.14       4000.78       275.33 o
  12   2   4       1894.82       2107.41       217.71 o
  13   2   4       1252.33       1601.54       217.35 o
  14   2   4        328.80        456.96       205.36 o
  15   2   4       3021.31       3060.22       239.48 o
  16   2   4        622.42        457.66       210.64 o
  17   2   4         40.75        -40.48       213.57 o
   1   3   4       1689.15       1523.10       333.53 o
   2   3   4      30654.36      28601.66      1504.14 o
   3   3   4        977.70        820.71       272.45 o
   4   3   4       4704.10       4577.44       305.94 o
   5   3   4        440.52        288.06       251.24 o
   6   3   4       1092.17       1164.66       234.40 o
   7   3   4          8.69        172.25       225.53 o
   8   3   4      22815.66      24184.91       271.12 o
   9   3   4         65.94        216.04       183.97 o
  10   3   4        752.67        900.92       200.40 o
  11   3   4        301.00        335.13       229.62 o
  12   3   4        401.71        464.13       212.48 o
  13   3   4         75.61         83.55       205.88 o
  14   3   4       1103.03       1037.68       243.35 o
  15   3   4        760.69        713.14       214.58 o
  16   3   4       1050.50        663.70       234.89 o
  17   3   4        238.77        207.45       231.09 o
   0   4   4     188282.59     169789.80      9216.75 o
   1   4   4      27227.27      26105.80       459.92 o
   2   4   4      25607.10      25015.95       483.33 o
   3   4   4       7110.15       5854.25       543.64 o
   4   4   4      80633.60      78287.60       607.14 o
   5   4   4         33.12        -66.24       241.17 o
   6   4   4      38893.34      36983.67      1671.46 o
   7   4   4       3937.41       3784.00       247.87 o
   8   4   4         82.23        -22.43       202.85 o
   9   4   4       1864.59       1860.67       204.97 o
  10   4   4          3.70        125.68       198.86 o
  11   4   4       4167.63       3948.38       204.77 o
  12   4   4        919.73       1113.28       246.81 o
  13   4   4         33.79        198.93       203.75 o
  14   4   4       1301.67        798.04       242.65 o
  15   4   4        279.69        580.55       225.35 o
  16   4   4        660.07        469.06       261.58 o
  17   4   4          5.52        -57.83       213.89 o
   1   5   4      11012.80      10107.88       344.32 o
   2   5   4      21112.74      20284.84       771.40 o
   3   5   4        618.33        597.31       270.67 o
   4   5   4      22362.74      21178.02       406.79 o
   5   5   4          2.44        328.16       291.07 o
   6   5   4      10718.74      10523.85       336.87 o
   7   5   4       1123.61       1065.74       280.32 o
   8   5   4       2564.93       2730.41       208.42 o
   9   5   4         44.59        239.97       185.16 o
  10   5   4       3662.96       3864.64       213.90 o
  11   5   4        141.46        285.89       200.14 o
  12   5   4        128.71        -23.47       208.48 o
  13   5   4         80.32        349.82       235.12 o
  14   5   4        917.27        754.19       228.22 o
  15   5   4          7.45         43.84       205.35 o
  16   5   4        889.30        354.81       249.29 o
   0   6   4       3037.20       2621.40       364.40 o
   1   6   4          1.21         81.52       265.02 o
   2   6   4      15223.37      14283.56       345.46 o
   3   6   4       1431.34       1465.75       291.04 o
   4   6   4       4259.42       3717.99       321.67 o
   5   6   4       9947.47       8664.48       889.06 o
   6   6   4       4622.18       4829.21       371.82 o
   7   6   4       3489.39       3851.37       407.60 o
   8   6   4       4618.56       4405.43       579.53 o
   9   6   4        260.79        375.15       201.80 o
  10   6   4       8251.50       7768.63       488.35 o
  11   6   4       3118.49       3170.55       221.85 o
  12   6   4        953.83        822.77       222.11 o
  13   6   4        849.86        869.73       215.66 o
  14   6   4         72.17        263.78       220.46 o
  15   6   4        186.48        475.94       254.65 o
  16   6   4        166.02         85.58       207.80 o
   1   7   4       1128.94       1210.93       289.71 o
   2   7   4       1025.81       1003.90       314.89 o
   3   7   4      15328.67      14599.45       493.51 o
   4   7   4       1774.63       1455.74       408.23 o
   5   7   4       4054.67       3488.14       446.90 o
   6   7   4        915.22       1254.84       329.49 o
   7   7   4         32.14        295.78       307.70 o
   8   7   4       2104.32       2134.69       256.91 o
   9   7   4        409.71        448.52       247.73 o
  10   7   4      10781.33      10955.81       303.86 o
  11   7   4       1657.95       1743.33       249.95 o
  12   7   4       2053.25       2274.42       283.68 o
  13   7   4          4.49       -135.57       372.48 o
  14   7   4       1236.71       1186.89       292.30 o
  15   7   4        347.07       -268.23       285.79 o
  16   7   4        418.71        390.77       299.03 o
   0   8   4       2128.09       2187.90       528.17 o
   1   8   4       4169.39       4210.12       392.91 o
   2   8   4      21429.65      19919.16       505.95 o
   3   8   4       2273.14       2043.89       366.49 o
   4   8   4       4385.57       3689.49       444.48 o
   5   8   4       3616.04       4286.99       432.00 o
   6   8   4       1271.41       1499.61       316.92 o
   7   8   4       7312.62       5791.48      2892.25 o
   8   8   4       3277.56       2908.66       270.53 o
   9   8   4       4324.18       4943.02       277.00 o
  10   8   4       1842.24       1889.53       298.82 o
  11   8   4      10273.16      10512.61       383.04 o
  12   8   4       1616.23       1640.19       302.68 o
  13   8   4         10.23        364.07       477.86 o
  14   8   4       1616.11       1702.36       295.56 o
  15   8   4          3.89          5.84       281.78 o
  16   8   4         83.93       -234.78       299.20 o
   1   9   4      24525.33      23377.44       511.98 o
   2   9   4      25882.14      27863.82       600.67 o
   3   9   4        122.21        495.02       338.25 o
   4   9   4       8724.37       8547.16       426.89 o
   5   9   4       4042.75       3551.20       346.70 o
   6   9   4        688.77        770.69       316.28 o
   7   9   4        741.39       1115.36       316.14 o
   8   9   4       1087.56       1189.35       246.87 o
   9   9   4         51.50       -160.18       264.43 o
  10   9   4      12744.49      14005.71      1041.76 o
  11   9   4       1128.33       1272.78       291.86 o
  12   9   4       4001.38       4771.36       340.52 o
  13   9   4        250.34        576.65       283.67 o
  14   9   4        196.87        533.12       407.43 o
  15   9   4         20.03       -104.48       294.96 o
  16   9   4          7.30        206.71       301.15 o
   0  10   4       5255.81       5308.58       555.36 o
   1  10   4        954.20       1452.50       339.49 o
   2  10   4       1996.60       1889.26       353.75 o
   3  10   4      15597.78      17104.11       865.87 o
   4  10   4       1437.24       1466.52       373.46 o
   5  10   4        534.64        579.34       320.99 o
   6  10   4       4083.73       3911.10       326.28 o
   7  10   4       2256.52       2639.42       319.04 o
   8  10   4       5165.29       4299.86       745.03 o
   9  10   4       2533.03       2505.72       471.19 o
  10  10   4         33.32         59.83       242.52 o
  11  10   4       8113.63       8369.08       336.69 o
  12  10   4       1324.28       1755.40       426.85 o
  13  10   4        821.97        372.67       284.28 o
  14  10   4        748.71        712.17       287.15 o
  15  10   4        685.01        710.66       311.18 o
   1  11   4      10496.25      11188.66       428.89 o
   2  11   4       1942.97       2115.93       330.29 o
   3  11   4        628.77        652.60       315.15 o
   4  11   4       1239.99       1407.11       450.58 o
   5  11   4       1185.27       1183.37       322.29 o
   6  11   4        743.48        662.26       309.98 o
   7  11   4        731.44       1106.69       313.35 o
   8  11   4       3089.01       3330.10       420.51 o
   9  11   4       1491.91       1564.07       245.49 o
  10  11   4       6326.18       6920.71       303.04 o
  11  11   4        383.10        608.77       316.34 o
  12  11   4       4355.27       4566.47       871.88 o
  13  11   4       1167.30       1082.12       296.92 o
  14  11   4        196.49         -2.46       342.31 o
  15  11   4         15.08        334.83       303.99 o
   0  12   4         69.58          0.35       431.08 o
   1  12   4         66.16        -94.24       382.89 o
   2  12   4       1238.93       1092.92       614.32 o
   3  12   4       4970.94       4984.60       334.88 o
   4  12   4       3966.39       4717.07       452.39 o
   5  12   4        303.03        371.63       313.97 o
   6  12   4       1171.49       1367.81       347.25 o
   7  12   4       1270.62       1541.28       249.90 o
   8  12   4        478.70        451.43       238.47 o
   9  12   4        476.79        466.84       243.45 o
  10  12   4        421.84        359.11       267.70 o
  11  12   4        238.04         66.86       288.82 o
  12  12   4       1266.35       1579.00       290.77 o
  13  12   4         18.06        314.20       285.21 o
  14  12   4          0.28         61.14       551.30 o
  15  12   4         71.34       -183.88       342.11 o
   1  13   4        127.63         56.38       346.80 o
   2  13   4         10.84        292.59       344.54 o
   3  13   4       1628.41       1375.16       307.25 o
   4  13   4       1088.72        827.48       341.05 o
   5  13   4        798.78        967.54       438.67 o
   6  13   4       2750.79       2967.28       317.62 o
   7  13   4        657.32       1092.78       313.82 o
   8  13   4       5827.72       5723.22       274.28 o
   9  13   4       2830.46       3472.60       565.31 o
  10  13   4       4901.12       5400.02       428.61 o
  11  13   4        428.36        194.53       386.60 o
  12  13   4       5581.52       5116.16       458.62 o
  13  13   4         22.00        102.10       327.01 o
  14  13   4        548.08        -50.49       419.43 o
   0  14   4       5976.75       6758.94       510.52 o
   1  14   4         80.12        -92.16       295.09 o
   2  14   4         69.05        384.42       341.00 o
   3  14   4        131.31         62.96       293.77 o
   4  14   4       1583.95       1522.95       669.22 o
   5  14   4        115.89        119.69       316.67 o
   6  14   4        375.16        370.50       251.08 o
   7  14   4       1159.21       1507.82       369.35 o
   8  14   4          6.23       -134.07       284.60 o
   9  14   4       3937.48       3960.23       364.23 o
  11  14   4        483.89        780.26       397.19 o
  12  14   4        671.23        143.34       402.13 o
  13  14   4        687.78        779.92       296.72 o
  14  14   4          0.04        327.28       434.97 o
   1  15   4       1694.67       1670.31       311.59 o
   2  15   4       2935.56       2992.62       323.63 o
   3  15   4       1292.38       1315.94       334.35 o
   4  15   4       5480.95       5816.60       384.72 o
   5  15   4        502.05        844.14       423.14 o
   6  15   4       3899.21       3422.86       548.22 o
   7  15   4       1482.20       1864.32       248.01 o
   8  15   4       1243.34       1451.82       303.49 o
   9  15   4          1.89        125.39       229.00 o
  10  15   4       3123.98       2682.89       435.67 o
  11  15   4        244.73        376.85       286.61 o
  12  15   4       1940.07       1895.45       304.76 o
  13  15   4         15.63       -107.33       413.78 o
   0  16   4        508.57        221.72       409.19 o
   1  16   4         65.21       -154.69       294.80 o
   2  16   4        387.92        423.84       286.47 o
   3  16   4          5.32        264.06       279.84 o
   4  16   4       1216.73       1355.55       359.71 o
   5  16   4        582.79       1111.14       293.85 o
   6  16   4        290.13        365.40       263.23 o
   7  16   4         94.38        267.98       294.41 o
   8  16   4         57.49        -25.31       241.23 o
   9  16   4        286.92        267.21       239.69 o
  10  16   4         15.45       -179.23       279.46 o
  11  16   4        350.48        -61.43       399.31 o
  12  16   4         13.62       -175.83       288.91 o
   1  17   4       5655.86       3849.13       508.93 o
   2  17   4        629.10        609.90       412.72 o
   3  17   4         17.52         48.79       534.53 o
   4  17   4       4796.34       4761.52       291.89 o
   5  17   4        455.73        -37.05       294.27 o
   6  17   4       3249.22       3388.26       383.87 o
   7  17   4       1147.14        967.58       251.41 o
   8  17   4         60.97        156.11       219.86 o
   9  17   4          1.18        199.64       237.85 o
  10  17   4        204.95        450.15       409.90 o
  11  17   4        101.90        -69.20       402.13 o
  12  17   4        678.40        299.06       298.23 o
   0  18   4        304.49        -53.66       444.50 o
   1  18   4          9.68        -37.69       281.80 o
   2  18   4         28.24       -294.97       302.24 o
   3  18   4        233.73         66.40       235.99 o
   4  18   4        141.65        303.00       286.10 o
   5  18   4          5.88        252.15       242.77 o
   6  18   4        778.13        904.99       226.01 o
   7  18   4       2439.01       2001.40       268.86 o
   8  18   4          0.68        -97.77       240.53 o
   9  18   4         17.78        131.58       296.14 o
  10  18   4        435.75        193.29       502.22 o
  11  18   4        107.54        585.02       426.49 o
   1  19   4         18.32          3.35       239.64 o
   2  19   4        307.67        209.89       300.95 o
   3  19   4       3625.74       3455.87       275.00 o
   4  19   4        109.78        429.14       204.45 o
   5  19   4       1904.27       2019.47       236.80 o
   6  19   4       1866.26       2065.42       268.69 o
   7  19   4        398.95        409.69       201.41 o
   8  19   4        256.20         58.26       264.93 o
   9  19   4        205.38       -182.16       345.83 o
  10  19   4        209.97       -191.00       403.55 o
   0  20   4       3641.92       3487.23       313.63 o
   1  20   4        375.83        684.24       253.32 o
   2  20   4        339.29        363.37       222.94 o
   3  20   4        125.58        133.20       240.10 o
   4  20   4          4.48        185.80       203.00 o
   5  20   4        853.88        931.67       270.57 o
   6  20   4         35.53         -0.78       223.61 o
   7  20   4        315.85         40.29       223.91 o
   8  20   4        234.68        245.36       361.51 o
   9  20   4        246.55         22.51       304.88 o
   1  21   4        377.29         20.06       220.96 o
   2  21   4         29.81        278.46       203.43 o
   3  21   4        244.73        259.64       201.39 o
   4  21   4        192.00        193.04       221.96 o
   5  21   4         80.50        268.17       210.17 o
   6  21   4        132.45        165.58       310.22 o
   7  21   4         40.24          6.04       239.46 o
   8  21   4       1429.71       1134.09       247.60 o
   0  22   4        149.79          5.67       384.13 o
   1  22   4        194.54        271.84       225.16 o
   2  22   4         39.80        158.76       212.94 o
   3  22   4         51.73         26.03       248.22 o
   4  22   4         15.14         61.63       302.95 o
   5  22   4        368.62        245.78       282.50 o
   6  22   4         71.76        114.82       215.30 o
   1  23   4         29.56        609.88       352.69 o
   2  23   4         20.51        141.27       248.15 o
   3  23   4        177.83        103.83       219.87 o
   4  23   4        221.05        161.73       219.17 o
   1   1   5      19908.46      19603.68       436.25 o
   2   1   5       7074.35       6139.84       399.95 o
   3   1   5       5255.58       5395.39       319.93 o
   4   1   5      10954.99      11671.35       350.24 o
   5   1   5      14566.12      13686.97       310.69 o
   6   1   5      28440.02      27369.19       385.76 o
   7   1   5         62.97        258.75       249.83 o
   8   1   5      13507.66      13504.41       265.04 o
   9   1   5       1712.91       1892.46       177.16 o
  10   1   5      20821.79      21442.97       441.86 o
  11   1   5         68.42         59.38       198.31 o
  12   1   5       7109.28       8415.54       380.26 o
  13   1   5         58.17        -37.08       200.76 o
  14   1   5       3567.76       3486.63       229.39 o
  15   1   5        491.38        350.64       201.34 o
  16   1   5       1640.19       1517.15       216.84 o
  17   1   5          0.49          1.18       213.51 o
   0   2   5      10573.26       9977.26       579.55 o
   1   2   5       3330.62       3153.38       358.88 o
   2   2   5       1996.34       1856.96       299.13 o
   3   2   5      27103.93      25367.65       412.68 o
   4   2   5      61494.75      59656.47       733.41 o
   5   2   5       1485.96       1358.66       256.21 o
   6   2   5      12970.73      12963.87       318.47 o
   7   2   5       6199.87       6702.01       260.97 o
   8   2   5       1886.94       2042.68       200.03 o
   9   2   5       1843.79       2301.96       182.60 o
  10   2   5          6.48        188.65       166.00 o
  11   2   5       1031.76       1337.22       190.78 o
  12   2   5       4171.65       4085.01       258.57 o
  13   2   5         21.52         90.91       204.97 o
  14   2   5         91.43         -6.77       205.08 o
  15   2   5        151.01        191.15       220.03 o
  16   2   5        477.73        196.37       211.82 o
  17   2   5          0.71        239.07       217.92 o
   1   3   5      21481.03      21209.27       473.91 o
   2   3   5       2856.36       2864.58       304.26 o
   3   3   5        708.45        698.65       272.73 o
   4   3   5       2990.77       2760.16       274.12 o
   5   3   5       3563.53       3876.49       274.62 o
   6   3   5      23901.50      23927.54      1727.80 o
   7   3   5       1095.87       1315.84       221.47 o
   8   3   5      34476.18      33211.14      1022.41 o
   9   3   5         47.42         16.24       171.94 o
  10   3   5       6682.05       6410.63       324.65 o
  11   3   5        108.08        182.20       192.69 o
  12   3   5       1122.22       1431.30       215.14 o
  13   3   5         23.77         50.67       207.23 o
  14   3   5       3019.01       2790.81       585.93 o
  15   3   5        112.37         50.38       199.06 o
  16   3   5       1708.74       1484.60       236.73 o
  17   3   5         30.89        187.13       222.55 o
   0   4   5      52637.87      52618.88       797.36 o
   1   4   5      31859.66      31178.75       476.01 o
   2   4   5       3286.99       3283.09       299.51 o
   3   4   5       3227.25       3376.70       329.27 o
   4   4   5      31604.63      31401.54       548.49 o
   5   4   5      10396.93       9733.63       654.57 o
   6   4   5       9058.17       9800.62       283.21 o
   7   4   5       5598.60       5730.36       242.98 o
   8   4   5       6647.17       7105.74       237.28 o
   9   4   5       5430.55       5803.08       223.90 o
  10   4   5       1168.23       1215.28       189.26 o
  11   4   5        349.64        396.01       191.13 o
  12   4   5          5.59        109.13       225.01 o
  13   4   5       1168.93       1272.22       226.71 o
  14   4   5         66.87        -86.66       240.90 o
  15   4   5        183.15         71.89       204.69 o
  16   4   5          5.97         65.46       225.80 o
  17   4   5        318.07        306.63       230.53 o
   1   5   5      28333.63      27682.96       452.76 o
   2   5   5      11267.82      10554.06       348.10 o
   3   5   5       2715.82       1925.49       285.90 o
   4   5   5       1318.35       1542.86       276.36 o
   5   5   5        718.47        792.47       299.94 o
   6   5   5      18810.91      16447.56      1803.91 o
   7   5   5        182.83        264.24       207.84 o
   8   5   5      18251.77      17719.18       570.90 o
   9   5   5       1259.74       1623.12       202.62 o
  10   5   5      10980.70      10674.53       603.39 o
  11   5   5          0.84        108.65       186.31 o
  12   5   5       2009.29       2144.88       222.45 o
  13   5   5        110.98        201.74       233.81 o
  14   5   5       4492.09       4667.70       250.92 o
  15   5   5        218.87        148.61       205.69 o
  16   5   5       4184.69       2975.59       626.80 o
   0   6   5      10650.40       9608.87       423.51 o
   1   6   5      11589.34      11876.43       322.54 o
   2   6   5       3850.70       3111.45       267.66 o
   3   6   5       1184.17       1305.28       266.10 o
   4   6   5        156.19         51.64       309.94 o
   5   6   5        218.38        440.82       307.20 o
   6   6   5      14073.41      14535.60       339.24 o
   7   6   5       1642.90       1935.62       253.03 o
   8   6   5        559.16        625.16       306.65 o
   9   6   5       1570.76       1658.24       224.86 o
  10   6   5        316.54        347.49       197.42 o
  11   6   5         62.03        216.14       227.60 o
  12   6   5        545.61        451.01       210.02 o
  13   6   5        265.35        177.03       203.97 o
  14   6   5        518.90        467.70       208.17 o
  15   6   5         62.64        237.02       207.17 o
  16   6   5        607.00        397.27       223.31 o
   1   7   5        135.19         30.49       237.39 o
   2   7   5        905.66        919.59       256.07 o
   3   7   5        266.61        262.59       322.39 o
   4   7   5       4393.69       3826.70       302.04 o
   5   7   5        520.77        518.86       291.61 o
   6   7   5      10118.56      10543.31       385.85 o
   7   7   5       1650.98       1974.10       332.08 o
   8   7   5      13685.54      14738.64       402.60 o
   9   7   5        967.29       1174.08       264.21 o
  10   7   5       2379.37       2717.74       335.39 o
  11   7   5          2.51        -49.72       237.83 o
  12   7   5       2464.90       3234.10       301.88 o
  13   7   5         36.16       -141.67       281.18 o
  14   7   5       1913.29       2001.23       505.93 o
  15   7   5          8.73       -165.75       283.46 o
  16   7   5        486.90        591.81       296.67 o
   0   8   5      17309.20      18572.96      1093.60 o
   1   8   5       7492.09       7114.56      1110.25 o
   2   8   5      13529.12      13000.27       364.48 o
   3   8   5       5795.70       5670.99       325.20 o
   4   8   5       1294.93       1096.66       419.22 o
   5   8   5       2029.22       2168.50       346.60 o
   6   8   5       2213.65       1992.88       328.97 o
   7   8   5         51.04         95.50       296.96 o
   8   8   5      12620.84      12959.99       396.59 o
   9   8   5       1427.81       1550.56       257.69 o
  10   8   5       1354.29       1324.41       279.01 o
  11   8   5        883.93        995.04       245.52 o
  12   8   5       2985.15       3168.79       300.93 o
  13   8   5        513.31        615.28       277.33 o
  14   8   5         25.71        391.25       277.23 o
  15   8   5          8.78        113.77       295.39 o
  16   8   5        312.39        218.47       300.52 o
   1   9   5       3044.41       2478.31       392.94 o
   2   9   5        142.74        262.89       342.16 o
   3   9   5      14573.18      14448.00       463.89 o
   4   9   5          9.39       -218.25       330.20 o
   5   9   5         11.80         84.04       309.87 o
   6   9   5       4255.21       4229.88       341.66 o
   7   9   5       8825.08       9000.49       366.03 o
   8   9   5       5667.98       5624.73       343.57 o
   9   9   5        272.28        139.08       268.39 o
  10   9   5       4979.92       4592.21       395.86 o
  11   9   5        855.66        811.47       242.48 o
  12   9   5        566.40        616.05       285.98 o
  13   9   5         28.45        182.18       394.72 o
  14   9   5        788.60        917.09       280.36 o
  15   9   5          2.24        128.33       280.60 o
  16   9   5        182.72        671.87       410.25 o
   0  10   5      39539.43      37590.77       791.20 o
   1  10   5       1225.22        831.93       680.70 o
   2  10   5      26506.01      27080.69       506.60 o
   3  10   5       8942.68       9300.78       399.79 o
   4  10   5      13890.80      12062.66      1911.63 o
   5  10   5        203.90        368.16       329.81 o
   6  10   5       5959.70       5767.03       376.89 o
   7  10   5        589.78        433.09       301.23 o
   8  10   5       1221.17        846.98       298.77 o
   9  10   5        253.43        165.92       238.35 o
  10  10   5        927.60        963.10       349.75 o
  11  10   5        226.34        558.28       235.49 o
  12  10   5         98.66        121.10       407.78 o
  13  10   5         14.11        706.21       341.19 o
  14  10   5       1098.91       1140.63       295.30 o
  15  10   5         87.21        530.13       291.58 o
   1  11   5        735.26        848.80       335.56 o
   2  11   5       2019.24       2218.65       370.29 o
   3  11   5       2185.12       2597.96       326.40 o
   4  11   5       6199.94       6969.01       413.96 o
   5  11   5          2.72         54.86       300.29 o
   6  11   5        122.50        263.35       307.27 o
   7  11   5       2037.17       2163.12       383.24 o
   8  11   5        640.33        683.08       359.77 o
   9  11   5       2575.13       2651.54       293.27 o
  10  11   5       6819.18       7445.37       292.47 o
  11  11   5         27.56        177.07       237.46 o
  12  11   5         11.55       -150.76       421.55 o
  13  11   5        220.48        -57.91       478.75 o
  14  11   5         38.47       -286.49       286.49 o
  15  11   5        448.46        404.06       306.64 o
   0  12   5      10981.65      10779.56       521.82 o
   1  12   5          1.63        -66.95       302.25 o
   2  12   5       7735.91       8181.93       356.50 o
   3  12   5        673.83       1199.78       297.60 o
   4  12   5       5814.46       6055.93       337.28 o
   5  12   5       2141.25       2201.72       365.99 o
   6  12   5       2506.41       1513.74      1011.86 o
   7  12   5       1563.53       1811.79       312.75 o
   8  12   5        102.98       -133.34       233.73 o
   9  12   5        259.85        556.11       261.87 o
  10  12   5        946.00       1012.09       243.58 o
  11  12   5        584.48        150.05       397.90 o
  12  12   5         71.14         84.93       287.09 o
  13  12   5        897.47        629.10       297.47 o
  14  12   5         26.62        580.45       466.92 o
   1  13   5        355.88        540.15       312.46 o
   2  13   5          3.27         31.07       305.56 o
   3  13   5       2328.87       2999.10       378.30 o
   4  13   5       2350.70       2582.36       309.74 o
   5  13   5       5704.25       5941.52       394.65 o
   6  13   5        125.05        260.37       374.21 o
   7  13   5        576.10        683.79       301.46 o
   8  13   5        490.19        486.80       247.29 o
   9  13   5       3803.35       3614.58       270.89 o
  10  13   5       4101.74       4500.78       777.43 o
  11  13   5        106.93        350.23       406.37 o
  12  13   5         82.87        -25.42       406.02 o
  13  13   5         31.98        155.70       433.20 o
  14  13   5        235.60        233.02       424.02 o
   0  14   5      39005.68      42618.67       748.84 o
   1  14   5       2984.30       3033.96       783.26 o
   2  14   5       4004.53       4263.74       314.47 o
   3  14   5        104.25        160.89       294.31 o
   4  14   5       7923.96       8148.93       620.32 o
   5  14   5       6162.22       6634.97       359.06 o
   6  14   5       8223.81       5767.82      1641.90 o
   7  14   5          8.59        341.89       387.30 o
   8  14   5       1494.67        910.59       301.54 o
   9  14   5        681.39        873.93       329.38 o
  10  14   5       3374.93       2680.76       618.20 o
  11  14   5        602.10        720.24       398.25 o
  12  14   5         10.84         38.32       286.46 o
  13  14   5         81.18        273.97       418.73 o
  14  14   5         75.69        313.16       407.78 o
   1  15   5         50.21       -120.94       290.97 o
   2  15   5          3.86        210.18       302.21 o
   3  15   5        100.28        181.29       409.55 o
   4  15   5       1091.23       1321.12       304.47 o
   5  15   5        695.42        872.54       312.54 o
   6  15   5       1107.29       1184.01       317.54 o
   7  15   5       1165.88       1159.85       245.53 o
   8  15   5        247.21         59.61       234.85 o
   9  15   5          5.31       -162.84       225.61 o
  10  15   5        116.60        125.69       399.31 o
  11  15   5         74.79        219.57       500.64 o
  12  15   5        538.41        646.86       291.20 o
  13  15   5         45.63        -23.30       414.49 o
   0  16   5       6608.12       7138.12       488.28 o
   1  16   5        293.82        453.62       297.69 o
   2  16   5       7257.85       8211.71       355.71 o
   3  16   5        183.85        351.90       350.21 o
   4  16   5      12333.14      13381.94       395.44 o
   5  16   5         45.95        174.11       341.95 o
   6  16   5         26.96        300.42       243.27 o
   7  16   5        223.81        168.15       288.01 o
   8  16   5        406.98        468.51       437.09 o
   9  16   5        566.61        691.36       294.26 o
  11  16   5        143.65       -123.24       295.16 o
  12  16   5         44.58       -230.16       293.58 o
   1  17   5         12.26        187.56       300.39 o
   2  17   5        943.19       1138.45       308.36 o
   3  17   5       1022.76        768.92       407.78 o
   4  17   5         13.42        128.96       290.36 o
   5  17   5         26.58        424.51       293.22 o
   6  17   5       2375.83       2471.64       261.57 o
   7  17   5        190.43        437.68       240.12 o
   8  17   5         17.49        -12.24       238.03 o
   9  17   5        222.06         75.89       221.62 o
  10  17   5       1568.81       2554.02       427.55 o
  11  17   5        164.93        228.43       407.43 o
  12  17   5        183.20        -34.81       396.31 o
   0  18   5        414.16        576.90       420.49 o
   1  18   5        468.23        372.69       310.93 o
   2  18   5       5622.08       5736.52       365.59 o
   3  18   5        483.59        829.26       481.39 o
   4  18   5       1429.24       2041.64       552.36 o
   5  18   5       1078.09       1180.31       252.27 o
   6  18   5       1268.38       1501.31       376.58 o
   7  18   5         42.16        141.76       342.20 o
   8  18   5       1603.71       1494.43       255.00 o
   9  18   5        574.00        570.74       464.45 o
  10  18   5       1563.07       2494.10       425.08 o
  11  18   5         31.63       -254.55       420.14 o
   1  19   5        289.41         96.40       305.13 o
   2  19   5       1292.85       1572.91       550.24 o
   3  19   5        150.81       -101.89       230.51 o
   4  19   5          7.83        148.94       233.63 o
   5  19   5        353.60        301.10       242.31 o
   6  19   5        409.64        296.62       314.94 o
   7  19   5        238.26        406.00       251.69 o
   8  19   5          4.64        137.70       240.85 o
   9  19   5        185.80        119.73       243.20 o
  10  19   5        302.15        672.41       331.87 o
   0  20   5       2330.54       3093.49       618.56 o
   1  20   5          0.25        157.12       223.64 o
   2  20   5       1795.27       1996.90       243.90 o
   3  20   5         14.87          1.69       305.03 o
   4  20   5       2018.84       2059.49       220.49 o
   5  20   5        114.44        -43.20       258.34 o
   6  20   5         23.37         60.31       211.66 o
   7  20   5         41.40        -41.24       212.78 o
   8  20   5       1894.45       1253.46       343.87 o
   9  20   5          0.77         -0.96       230.94 o
   1  21   5       1558.04       1171.34       231.86 o
   2  21   5        866.50       1036.76       210.27 o
   3  21   5         69.05        312.35       241.39 o
   4  21   5        660.70        486.27       212.88 o
   5  21   5         68.75        213.79       242.97 o
   6  21   5        290.65        137.16       215.47 o
   7  21   5        104.33        308.01       270.66 o
   8  21   5         47.61         56.48       211.94 o
   0  22   5       1200.69        756.10       351.10 o
   1  22   5        108.58        157.22       205.65 o
   2  22   5       2358.20       2237.64       234.49 o
   3  22   5        165.38         11.87       246.77 o
   4  22   5       1320.26        863.22       257.01 o
   5  22   5        132.66         78.73       241.77 o
   6  22   5        494.59        592.77       276.63 o
   1  23   5         19.57        374.95       303.94 o
   2  23   5        205.69        260.29       218.52 o
   3  23   5        722.22        769.87       219.82 o
   4  23   5       1164.23        882.75       226.79 o
   0   0   6      73547.05      47579.13      1149.20 o
   1   0   6       7177.71       7295.56       524.00 o
   2   0   6       8380.43       8511.25       534.74 o
   3   0   6      84983.59      83045.98      2854.12 o
   4   0   6      10825.53      12391.41       454.72 o
   5   0   6       2341.15       2365.22       367.97 o
   6   0   6      99587.73     100278.15      1058.47 o
   7   0   6        869.48        885.35       358.56 o
   8   0   6         31.60         59.82       316.22 o
   9   0   6        392.75        337.31       235.72 o
  10   0   6        258.96        195.07       282.48 o
  11   0   6       2741.54       2913.26       265.59 o
  12   0   6       2032.92       2309.34       306.06 o
  13   0   6      10751.52      11350.37       385.24 o
  14   0   6        275.33        135.70       363.12 o
  15   0   6        214.49         38.27       284.79 o
  16   0   6        482.09        159.26       299.28 o
  17   0   6         10.05        136.32       299.20 o
   1   1   6      15191.91      13894.19       433.78 o
   2   1   6      16176.63      15175.62       404.15 o
   3   1   6        214.84        568.15       324.89 o
   4   1   6      55650.37      56475.56       483.62 o
   5   1   6       6520.26       6454.32       277.14 o
   6   1   6      18825.01      19468.69       345.54 o
   7   1   6       1181.68       1412.77       251.61 o
   8   1   6        216.91        245.87       215.63 o
   9   1   6        666.86        612.81       169.93 o
  10   1   6       1056.08        848.91       177.13 o
  11   1   6       2028.78       2097.04       186.08 o
  12   1   6        509.62        552.66       188.83 o
  13   1   6        782.72        854.59       217.54 o
  14   1   6          5.72        163.41       214.34 o
  15   1   6        115.05        396.92       194.92 o
  16   1   6         63.84        127.56       205.34 o
  17   1   6         12.77        104.77       234.30 o
   0   2   6     163235.09     159587.03      4276.06 o
   1   2   6      12003.26      12176.85       401.99 o
   2   2   6      20183.71      20383.20       451.43 o
   3   2   6      36398.26      34509.64       435.86 o
   4   2   6        720.13       1119.53       278.55 o
   5   2   6      11946.34      11303.12       307.01 o
   6   2   6       4520.06       4494.78       280.76 o
   7   2   6       8311.17       7757.81      1113.04 o
   8   2   6      27832.04      26831.54       550.09 o
   9   2   6       6152.11       6157.47       216.10 o
  10   2   6       2415.10       2444.17       182.17 o
  11   2   6      11224.39      11608.92       212.91 o
  12   2   6       1159.80        923.92       190.62 o
  13   2   6       3144.63       3572.70       230.06 o
  14   2   6          5.19       -124.74       205.27 o
  15   2   6       1002.77        903.85       215.84 o
  16   2   6          5.29        -85.05       206.29 o
  17   2   6        143.46        143.95       231.62 o
   1   3   6      13507.52      12227.26       460.52 o
   2   3   6       1391.96       1579.52       262.31 o
   3   3   6        432.84        358.44       270.59 o
   4   3   6        596.99        499.69       277.53 o
   5   3   6       6223.25       6026.70       288.24 o
   6   3   6       7383.60       7062.44       311.50 o
   7   3   6        595.49        867.26       237.09 o
   8   3   6        959.24       1088.63       198.91 o
   9   3   6        217.11        245.04       187.89 o
  10   3   6         95.07        244.47       169.15 o
  11   3   6         81.09        278.68       183.38 o
  12   3   6       2355.94       2089.57       195.54 o
  13   3   6        138.54        192.53       194.62 o
  14   3   6         40.68        173.10       233.27 o
  15   3   6         37.42        152.69       220.96 o
  16   3   6         11.35        -66.76       208.07 o
  17   3   6        593.96        326.71       242.66 o
   0   4   6     308278.00     307324.12      1621.10 o
   1   4   6       4635.32       4839.66       329.89 o
   2   4   6       5799.03       5261.89       310.86 o
   3   4   6         40.77        -82.49       282.46 o
   4   4   6       1394.17       1256.62       261.37 o
   5   4   6       3431.45       3175.74       285.02 o
   6   4   6      31616.30      31583.98       389.06 o
   7   4   6        955.19        976.61       237.48 o
   8   4   6       4792.02       5123.42       230.53 o
   9   4   6       6253.77       6663.90       239.61 o
  10   4   6       3988.83       3984.97       203.97 o
  11   4   6       2977.43       2842.44       327.95 o
  12   4   6       2621.71       2622.15       208.93 o
  13   4   6       5876.46       5824.41       251.22 o
  14   4   6         53.55        -39.30       241.12 o
  15   4   6        142.60        204.30       220.70 o
  16   4   6         40.70        121.14       226.13 o
  17   4   6        626.19        538.02       231.48 o
   1   5   6        997.48        989.01       268.11 o
   2   5   6      83583.34      73950.41      3320.42 o
   3   5   6       4551.29       4594.62       263.07 o
   4   5   6        391.93        568.60       255.33 o
   5   5   6        203.26        208.49       284.40 o
   6   5   6      16221.55      15411.05       997.43 o
   7   5   6        678.89        597.56       225.71 o
   8   5   6         12.47        -53.11       190.23 o
   9   5   6       1308.92       1557.98       198.86 o
  10   5   6          8.74        123.69       211.22 o
  11   5   6        934.62       1201.43       190.71 o
  12   5   6       1073.11       1337.91       196.00 o
  13   5   6        229.23        243.62       205.17 o
  14   5   6        993.14        927.76       215.27 o
  15   5   6        186.11        163.87       223.02 o
  16   5   6        214.38         79.72       217.12 o
   0   6   6       1611.57       1739.23       350.82 o
   1   6   6       4814.08       4922.25       278.14 o
   2   6   6       2161.16       2162.59       258.03 o
   3   6   6        186.37        225.92       250.55 o
   4   6   6      19553.78      18833.74       374.78 o
   5   6   6       1152.56        714.86       293.66 o
   6   6   6         11.99        301.68       274.76 o
   7   6   6       5838.81       5392.82       554.34 o
   8   6   6         81.03        267.00       235.84 o
   9   6   6      11877.55      10918.27      1256.78 o
  10   6   6       1029.32       1089.14       212.67 o
  11   6   6        165.08        220.46       185.51 o
  12   6   6        539.13        466.03       185.09 o
  13   6   6       2807.18       2750.53       225.34 o
  14   6   6         57.80         69.85       220.40 o
  15   6   6        915.65        814.71       244.10 o
  16   6   6        248.27         48.41       233.28 o
   1   7   6       5736.65       5578.63       277.89 o
   2   7   6       8565.52       7718.53       331.95 o
   3   7   6       4485.69       4468.25       335.81 o
   4   7   6       1154.18       1211.61       265.13 o
   5   7   6        707.06        773.32       275.10 o
   6   7   6      10836.88      11451.43       328.52 o
   7   7   6         84.14        192.63       249.52 o
   8   7   6        957.27        650.29       306.31 o
   9   7   6         70.05        -90.14       285.45 o
  10   7   6       3413.64       3348.83       261.24 o
  11   7   6        844.84        851.89       235.81 o
  12   7   6         91.94         30.85       293.71 o
  13   7   6         62.31        262.18       285.47 o
  14   7   6        376.39        536.08       307.51 o
  15   7   6         15.62       -104.74       297.60 o
  16   7   6         73.90       -250.70       282.72 o
   0   8   6       8150.61       8361.85       407.05 o
   1   8   6       1791.36       1982.14       267.17 o
   2   8   6       1039.10        798.44       258.35 o
   3   8   6        807.71        965.31       286.47 o
   4   8   6      20575.03      21128.15       394.50 o
   5   8   6       7361.90       7413.70       295.45 o
   6   8   6       2708.04       2851.72       320.45 o
   7   8   6       5893.25       6529.94       331.76 o
   8   8   6        921.59       1118.52       311.39 o
   9   8   6       3778.43       3773.29       380.77 o
  10   8   6        409.17        279.06       237.33 o
  11   8   6        517.55        692.34       258.03 o
  12   8   6        330.89        313.43       238.62 o
  13   8   6       2106.49       1887.79       285.61 o
  14   8   6        180.84         18.58       312.10 o
  15   8   6        526.55        652.02       555.01 o
  16   8   6         58.40        -55.50       293.04 o
   1   9   6       4711.56       4659.70       322.48 o
   2   9   6       2196.58       2134.87       353.03 o
   3   9   6       1531.40       1463.58       287.33 o
   4   9   6      14806.67      16023.02       474.85 o
   5   9   6       3693.18       3203.20       607.26 o
   6   9   6       5357.37       5577.15       338.34 o
   7   9   6         15.22         27.61       293.95 o
   8   9   6       3866.16       3891.25       331.27 o
   9   9   6        129.82        210.08       305.22 o
  10   9   6       3460.59       3704.24       269.61 o
  11   9   6          3.19       -121.67       233.19 o
  12   9   6          6.85        232.28       229.44 o
  13   9   6        173.40         48.37       396.84 o
  14   9   6        858.32        834.73       289.80 o
  15   9   6         15.48        -14.67       300.10 o
   0  10   6      16945.79      18073.74       800.74 o
   1  10   6       2138.67       2430.17       399.39 o
   2  10   6      15058.06      15406.61       439.22 o
   3  10   6       4020.59       3629.99      1155.21 o
   4  10   6       6867.43       8054.13       410.45 o
   5  10   6       1781.40       2559.91       412.72 o
   6  10   6        229.18       -124.10       302.47 o
   7  10   6       6797.30       6135.35       359.77 o
   8  10   6        774.37        743.83       341.04 o
   9  10   6       2275.11       2234.56       418.73 o
  10  10   6        397.65        480.58       245.05 o
  11  10   6        440.19        241.52       295.91 o
  12  10   6        416.70        249.97       246.76 o
  13  10   6        132.53        397.69       280.58 o
  14  10   6          7.64        -44.67       286.73 o
  15  10   6        222.07       -163.81       285.68 o
   1  11   6      10399.50      10426.76       384.04 o
   2  11   6          3.20         11.61       304.03 o
   3  11   6         69.31        306.80       308.93 o
   4  11   6       2672.99       2708.01       553.77 o
   5  11   6       3374.85       3097.34       342.64 o
   6  11   6       1778.22       1778.42       303.21 o
   7  11   6       4377.93       4408.12       328.09 o
   8  11   6       1228.99       1259.21       334.51 o
   9  11   6        260.22        148.12       242.31 o
  10  11   6         36.01       -198.79       269.01 o
  11  11   6        602.28        687.38       241.39 o
  12  11   6         34.80        200.52       282.76 o
  13  11   6        113.39        522.14       285.34 o
  14  11   6        717.30       1256.30       421.37 o
  15  11   6         45.53        -44.57       399.48 o
   0  12   6         15.15       -171.23       414.84 o
   1  12   6         48.19        179.38       306.07 o
   2  12   6          5.73         60.99       333.59 o
   3  12   6        689.79        572.07       305.37 o
   4  12   6         60.95         92.12       297.54 o
   5  12   6       1367.87       1293.14       323.61 o
   6  12   6        171.84        790.58       307.82 o
   7  12   6       1252.77       1077.32       298.63 o
   8  12   6        177.97        349.46       347.97 o
   9  12   6       7051.11       7358.01       352.99 o
  10  12   6        832.75        591.06       238.09 o
  11  12   6       3079.24       2565.21       342.12 o
  12  12   6        293.64        573.29       279.09 o
  13  12   6       1648.40        710.71       440.62 o
  14  12   6        275.46        -17.80       299.43 o
   1  13   6       2845.23       2922.05       407.78 o
   2  13   6       4562.58       4547.00       549.53 o
   3  13   6      25759.16      26415.92       470.95 o
   4  13   6       2626.39       2695.16       318.17 o
   5  13   6       5708.27       5823.56       497.11 o
   6  13   6       3905.70       4185.97       535.80 o
   7  13   6       1635.25       2406.73       354.30 o
   8  13   6        177.60        267.54       301.16 o
   9  13   6       3373.56       2663.55       310.41 o
  10  13   6        361.50        388.72       431.79 o
  11  13   6        233.63        218.81       230.86 o
  12  13   6        421.41        252.42       284.58 o
  13  13   6        166.12       -265.85       432.14 o
  14  13   6        286.24        296.01       302.76 o
   0  14   6       5099.73       5670.81       488.63 o
   1  14   6        684.27        392.61       302.91 o
   2  14   6        329.68        387.85       292.03 o
   3  14   6       2372.61       2412.66       321.59 o
   4  14   6       3555.98       3390.67       338.91 o
   5  14   6        147.02       -315.91       315.91 o
   6  14   6        275.36       -272.55       413.43 o
   7  14   6        929.46        868.03       304.27 o
   8  14   6        752.85        588.86       237.94 o
   9  14   6       2633.15       2746.50       251.00 o
  10  14   6        246.89        -45.98       230.12 o
  11  14   6        860.20        603.37       255.82 o
  12  14   6        131.72       -386.25       396.48 o
  13  14   6         21.70        494.99       415.55 o
   1  15   6       8856.33       9419.86       351.43 o
   2  15   6       3038.87       2753.41       571.60 o
   3  15   6       3122.91       3042.25       327.15 o
   4  15   6       1177.29       1764.34       364.05 o
   5  15   6       2334.54       1922.96       574.78 o
   6  15   6       2721.98       3012.29       364.51 o
   7  15   6       1231.55       1227.26       303.99 o
   8  15   6       2184.22       2006.24       316.93 o
   9  15   6       1119.23       1086.38       241.75 o
  10  15   6       2982.65       2896.58       417.14 o
  11  15   6          9.92        471.96       279.70 o
  12  15   6        460.00        699.05       409.90 o
  13  15   6         69.18        153.93       418.37 o
   0  16   6       1657.05       1757.52       440.62 o
   1  16   6       3881.54       4645.21       452.27 o
   2  16   6        388.66        281.48       293.31 o
   3  16   6        435.57        677.06       399.48 o
   4  16   6         91.18         71.41       304.14 o
   5  16   6       2617.31       2921.79       333.64 o
   6  16   6         85.87         16.97       294.18 o
   7  16   6        176.89        198.29       237.95 o
   8  16   6          2.29        -44.49       428.97 o
   9  16   6        919.57        821.18       294.26 o
  10  16   6         11.14         45.54       420.84 o
  11  16   6        116.79        139.72       280.85 o
  12  16   6        560.96        364.71       435.32 o
   1  17   6       2008.91       2544.12       581.84 o
   2  17   6        383.71        657.53       294.97 o
   3  17   6       2363.30       2564.11       475.22 o
   4  17   6       1372.64       1010.52       309.81 o
   5  17   6       1194.07       1122.28       303.57 o
   6  17   6         17.27        218.70       303.66 o
   7  17   6         68.45         66.98       304.65 o
   8  17   6        716.95        542.49       263.24 o
   9  17   6          4.62         16.91       229.64 o
  10  17   6       4784.87       3827.19       357.03 o
  11  17   6          0.80       -138.90       283.79 o
  12  17   6        231.19         64.26       410.96 o
   0  18   6       2827.14       2797.63       453.68 o
   1  18   6        444.47        567.30       312.69 o
   2  18   6          0.09        257.56       305.75 o
   3  18   6       3699.45       3350.51       325.32 o
   4  18   6        437.66        284.41       277.78 o
   5  18   6       1133.31       1669.05       351.41 o
   6  18   6       1585.50       1429.92       249.19 o
   7  18   6        484.00        841.81       298.16 o
   8  18   6        349.42        255.85       312.52 o
   9  18   6         47.27         -4.79       265.79 o
  10  18   6         14.18        -73.32       332.23 o
  11  18   6         42.58        198.41       286.22 o
   1  19   6        182.96        512.01       289.47 o
   2  19   6        384.66        110.61       343.31 o
   3  19   6       6996.82       6580.03       347.92 o
   4  19   6       1320.94       1338.83       304.48 o
   5  19   6       4791.42       4630.47       303.27 o
   6  19   6        137.65        152.88       286.89 o
   7  19   6        724.96        618.11       316.69 o
   8  19   6        264.27        289.17       235.03 o
   9  19   6         23.16        142.68       246.62 o
  10  19   6       1931.47       1177.60       489.51 o
   0  20   6        228.31        540.18       436.73 o
   1  20   6        293.37        -15.70       303.31 o
   2  20   6       1936.03       2092.57       302.76 o
   3  20   6         97.46       -294.71       294.71 o
   4  20   6        138.04         34.84       261.08 o
   5  20   6         57.32        211.05       357.06 o
   6  20   6        210.30        197.41       351.45 o
   7  20   6        101.24        175.32       213.36 o
   8  20   6         17.93          3.18       214.15 o
   9  20   6         11.49        202.96       280.16 o
   1  21   6       1389.93       1812.38       250.78 o
   2  21   6        684.64        743.49       245.66 o
   3  21   6       4921.91       5310.47       346.41 o
   4  21   6        653.56        519.23       208.37 o
   5  21   6       2565.72       2125.85       269.51 o
   6  21   6        421.25        417.46       226.44 o
   7  21   6        913.33        656.50       237.85 o
   0  22   6        203.78        182.88       426.49 o
   1  22   6          0.11         -6.17       207.10 o
   2  22   6         80.74        318.73       206.33 o
   3  22   6        271.88        237.09       237.96 o
   4  22   6        108.20       -150.84       215.42 o
   5  22   6        188.02        287.97       254.05 o
   6  22   6          0.52          6.63       252.34 o
   1  23   6       3786.11       3320.86       364.56 o
   2  23   6         57.87        206.28       223.35 o
   3  23   6         17.88         74.82       217.32 o
   4  23   6        270.03        318.30       234.46 o
   1   1   7        161.99        102.34       321.52 o
   2   1   7          3.72        -40.49       281.38 o
   3   1   7       3642.27       3885.92       298.49 o
   4   1   7          1.57        186.30       248.17 o
   5   1   7       2231.98       2035.43       265.75 o
   6   1   7         38.57        296.48       284.34 o
   7   1   7       8385.45       7692.08       406.96 o
   8   1   7       5369.12       5723.75       248.85 o
   9   1   7       5055.38       5341.93       228.30 o
  10   1   7       2774.24       2684.88       189.56 o
  11   1   7         72.82        165.14       166.03 o
  12   1   7        472.03        461.31       170.06 o
  13   1   7        423.96        450.65       202.04 o
  14   1   7        395.46        331.87       205.83 o
  15   1   7       1431.88       1377.87       228.68 o
  16   1   7         73.02        150.32       221.03 o
  17   1   7        221.48        159.65       214.57 o
   0   2   7       4860.39       4749.59       538.09 o
   1   2   7     149229.48     135225.41      6914.77 o
   2   2   7        164.05        188.20       275.90 o
   3   2   7        374.06        423.93       283.42 o
   4   2   7       3123.85       3313.69       285.51 o
   5   2   7        920.94       1027.81       256.04 o
   6   2   7      18149.22      17528.86       337.28 o
   7   2   7       1485.99       1903.50       250.62 o
   8   2   7      25308.30      27206.91       326.77 o
   9   2   7       2729.79       2749.45       217.09 o
  10   2   7        841.14       1004.04       170.70 o
  11   2   7          1.56        176.76       169.01 o
  12   2   7       1085.32       1055.11       187.88 o
  13   2   7         67.06        126.89       180.26 o
  14   2   7          0.26         18.48       202.89 o
  15   2   7          6.75        104.07       205.63 o
  16   2   7         88.97        154.66       213.70 o
  17   2   7        183.14         38.97       221.60 o
   1   3   7     227978.28     207538.62      3857.07 o
   2   3   7       1003.87       1423.20       305.40 o
   3   3   7      20247.19      18402.80       362.24 o
   4   3   7          0.38         97.21       249.26 o
   5   3   7      56269.90      55890.66      1130.38 o
   6   3   7         54.83         83.35       263.47 o
   7   3   7      31241.12      31989.80       601.93 o
   8   3   7      11203.66      11972.71       280.94 o
   9   3   7       6338.28       7085.52       223.55 o
  10   3   7        264.04        266.60       169.25 o
  11   3   7       3463.49       3320.88       189.97 o
  12   3   7          3.22        106.65       184.93 o
  13   3   7         44.80        163.11       181.17 o
  14   3   7         15.62         72.65       202.50 o
  15   3   7       1644.13       1574.62       221.72 o
  16   3   7        458.41        291.18       207.96 o
  17   3   7        141.87         43.88       215.55 o
   0   4   7       6821.42       7705.91       460.96 o
   1   4   7     154549.94     147567.89      6557.69 o
   2   4   7      16442.50      15598.16       466.42 o
   3   4   7        323.17        357.69       258.00 o
   4   4   7       6096.83       5321.69       501.03 o
   5   4   7       5551.40       5645.22       307.50 o
   6   4   7       3014.84       3134.03       283.96 o
   7   4   7       9489.30      10034.14       270.60 o
   8   4   7         55.56       -103.89       196.95 o
   9   4   7       1632.88       2008.50       220.02 o
  10   4   7         13.36         26.51       195.04 o
  11   4   7        131.96        164.21       196.39 o
  12   4   7        585.74        538.63       186.59 o
  13   4   7        381.55        565.54       181.66 o
  14   4   7         32.45        110.13       219.63 o
  15   4   7       1141.16       1017.77       215.25 o
  16   4   7        848.68        636.97       214.90 o
   1   5   7      36580.60      34906.33      2861.88 o
   2   5   7       1006.96        711.57       273.71 o
   3   5   7       3211.39       3128.01       271.96 o
   4   5   7         26.41        201.51       258.83 o
   5   5   7       7845.22       7743.06       314.40 o
   6   5   7       2412.52       2097.13       331.81 o
   7   5   7      11956.29      11922.73      1050.32 o
   8   5   7       1571.07       1427.99       205.72 o
   9   5   7         60.02         49.33       205.73 o
  10   5   7       2048.54       2226.22       203.43 o
  11   5   7       1793.82       1898.12       223.18 o
  12   5   7       1155.17       1180.97       197.93 o
  13   5   7       1607.56       1655.04       200.90 o
  14   5   7        182.30        359.01       219.43 o
  15   5   7          2.22        -29.28       207.90 o
  16   5   7        369.26        337.24       214.69 o
   0   6   7       3821.00       3726.68       377.35 o
   1   6   7         28.72         -5.90       246.34 o
   2   6   7          0.38         11.39       269.21 o
   3   6   7      17196.26      17177.61       354.15 o
   4   6   7       2013.71       2120.28       305.18 o
   5   6   7       1139.19       1080.15       277.44 o
   6   6   7        214.61        774.47       221.48 o
   7   6   7       1381.75       1120.91       249.64 o
   8   6   7        265.24        366.15       215.16 o
   9   6   7       3697.21       3776.94       218.13 o
  10   6   7       2639.67       2780.13       244.58 o
  11   6   7        139.25       -126.17       190.69 o
  12   6   7        332.02        329.89       200.43 o
  13   6   7        484.88        689.65       197.05 o
  14   6   7        332.65        313.90       211.35 o
  15   6   7       1053.97        773.73       229.94 o
  16   6   7        140.51        126.71       213.72 o
   1   7   7      44070.14      42615.47       668.49 o
   2   7   7       5458.69       5265.65       285.34 o
   3   7   7      11670.82       9831.27       487.07 o
   4   7   7       1515.74       1544.11       249.25 o
   5   7   7      22338.82      21687.52       354.78 o
   6   7   7        236.91        294.53       240.03 o
   7   7   7      14858.48      15005.54       332.47 o
   8   7   7          6.40         15.00       240.38 o
   9   7   7        959.69       1504.90       306.81 o
  10   7   7       2037.13       2267.58       323.01 o
  11   7   7        960.79       1424.89       245.80 o
  12   7   7         19.50       -153.33       301.24 o
  13   7   7       1720.63       1684.31       314.45 o
  14   7   7        300.98        515.66       333.07 o
  15   7   7        107.99        174.48       288.64 o
  16   7   7        143.27       -224.41       338.28 o
   0   8   7       1679.00       1374.20       379.24 o
   1   8   7       8630.23       8186.96       297.96 o
   2   8   7       5205.86       5002.95       301.92 o
   3   8   7       2642.90       3114.60       271.62 o
   4   8   7       3151.55       3205.32       262.06 o
   5   8   7       2253.80       2544.71       364.77 o
   6   8   7        265.11        716.60       240.02 o
   7   8   7      11449.79      11709.00       327.91 o
   8   8   7       1775.42       1654.16       318.29 o
   9   8   7      10429.83       9347.56      2764.09 o
  10   8   7         47.61         47.89       284.88 o
  11   8   7        656.81        714.55       235.54 o
  12   8   7       1322.43        904.21       286.26 o
  13   8   7        693.79        660.18       234.43 o
  14   8   7        277.88        554.99       319.45 o
  15   8   7       1502.30       1455.96       309.83 o
  16   8   7         44.42       -294.20       294.20 o
   1   9   7       4141.63       4067.15       270.69 o
   2   9   7       2047.28       2343.01       249.40 o
   3   9   7      11282.23      11146.45       336.50 o
   4   9   7       4635.37       4684.16       290.03 o
   5   9   7        166.78        352.97       243.59 o
   6   9   7        240.78        544.52       561.01 o
   7   9   7       1195.56       1680.51       434.26 o
   8   9   7       2013.58       1998.46       368.36 o
   9   9   7       3900.02       3902.00       337.44 o
  10   9   7          3.08        158.21       235.51 o
  11   9   7       1552.72       1400.10       274.87 o
  12   9   7        159.74       -275.03       333.36 o
  13   9   7        207.53        -47.64       239.29 o
  14   9   7         70.23        126.15       279.43 o
  15   9   7        284.37        250.20       374.77 o
   0  10   7       1413.00       2098.58       488.63 o
   1  10   7       9218.87       8292.57      1112.12 o
   2  10   7         92.93        250.71       257.74 o
   3  10   7      14402.69      13192.88      2568.69 o
   4  10   7        636.33        889.71       438.85 o
   5  10   7        479.82        731.69       291.88 o
   6  10   7        390.94        854.53       358.45 o
   7  10   7       3250.21       3517.90       316.38 o
   8  10   7       2156.54       2324.06       322.65 o
   9  10   7       2429.29       2327.53       494.46 o
  10  10   7        816.36        860.51       242.02 o
  11  10   7       2366.53       2313.82       254.83 o
  12  10   7        237.53         92.18       235.46 o
  13  10   7       3482.28       3322.93       300.40 o
  14  10   7         67.69       -278.06       278.06 o
  15  10   7        606.91        335.41       285.08 o
   1  11   7      21626.23      19117.15      2284.81 o
   2  11   7        115.02        152.22       308.39 o
   3  11   7       2031.44       1713.96       309.29 o
   4  11   7        230.49        270.05       297.92 o
   5  11   7       2157.53       2211.97       581.31 o
   6  11   7        832.91        990.99       314.51 o
   7  11   7       1223.98       1082.30       344.17 o
   8  11   7        734.16        879.14       297.04 o
   9  11   7        713.75        617.57       300.71 o
  10  11   7          7.97       -241.55       241.55 o
  11  11   7       3576.10       3390.95       267.83 o
  12  11   7        119.85        283.40       233.06 o
  13  11   7        220.22       -406.02       406.02 o
  14  11   7        494.40        334.71       290.69 o
  15  11   7        197.02        -77.56       618.73 o
   0  12   7          8.36        291.63       414.14 o
   1  12   7      10626.67      11160.02       371.40 o
   2  12   7       1462.79       1612.35       316.57 o
   3  12   7         12.39         70.44       304.34 o
   4  12   7        533.44        871.80       309.38 o
   5  12   7       5602.48       6406.29       731.89 o
   6  12   7        644.54         -5.06       362.41 o
   7  12   7       1443.57       1806.97       307.81 o
   8  12   7         68.95       -124.05       293.22 o
   9  12   7        732.64        931.81       299.22 o
  10  12   7        898.31        699.36       242.04 o
  11  12   7       2894.93       3263.10       450.85 o
  12  12   7       1087.59        955.10       251.55 o
  13  12   7       3346.34       3632.97       426.85 o
  14  12   7         74.49       -192.16       294.19 o
   1  13   7        124.81        168.58       420.85 o
   2  13   7        342.12        350.90       307.41 o
   3  13   7       3628.39       3801.03       340.60 o
   4  13   7         93.82        105.73       305.60 o
   5  13   7       3399.96       4031.76       386.66 o
   6  13   7        457.50        412.09       302.90 o
   7  13   7        182.13        496.52       306.89 o
   8  13   7        678.75        986.13       663.40 o
   9  13   7         15.67        291.48       277.81 o
  10  13   7        206.01        330.53       348.36 o
  11  13   7          3.40        -17.35       255.49 o
  12  13   7         15.34        161.61       292.62 o
  13  13   7        170.34        721.08       289.34 o
  14  13   7        127.08        331.30       300.44 o
   0  14   7        110.56        164.88       433.91 o
   1  14   7         33.44        237.65       289.55 o
   2  14   7        474.96        240.70       300.18 o
   3  14   7        622.73        944.59       292.94 o
   4  14   7          7.02        386.31       359.81 o
   5  14   7      12102.77      12568.21       417.00 o
   6  14   7       3096.93       3133.42       303.03 o
   7  14   7       2821.86       2881.08       398.96 o
   8  14   7        910.04        840.90       293.16 o
   9  14   7       3134.47       2983.28       264.63 o
  10  14   7          4.54        -56.74       226.28 o
  11  14   7       5433.16       5547.54       334.96 o
  12  14   7         50.07       -396.13       396.13 o
  13  14   7        659.14        559.78       337.90 o
   1  15   7          2.89        267.53       309.09 o
   2  15   7       5394.79       4970.28       328.22 o
   3  15   7        628.10        643.16       294.72 o
   4  15   7        362.19        591.20       299.58 o
   5  15   7       4655.00       5410.53       391.54 o
   6  15   7       2928.35       3737.20       382.68 o
   7  15   7         15.45         75.19       293.46 o
   8  15   7        128.98       -220.50       275.33 o
   9  15   7          8.97       -273.95       479.28 o
  10  15   7         23.86         52.90       233.01 o
  11  15   7        652.36        671.74       295.72 o
  12  15   7         78.06        -15.18       400.01 o
  13  15   7         93.23        332.21       301.70 o
   0  16   7        321.80        490.75       455.09 o
   1  16   7       1299.22       1228.13       362.68 o
   2  16   7       2927.98       2300.63       327.03 o
   3  16   7        173.45       -113.47       293.12 o
   4  16   7        126.51        326.74       292.25 o
   5  16   7       2896.17       2707.46       550.59 o
   6  16   7       1381.55       1197.96       318.74 o
   7  16   7        204.43        104.90       307.14 o
   8  16   7        217.58        262.40       283.05 o
   9  16   7       4192.31       4991.90       300.50 o
  10  16   7        102.52        -93.63       320.98 o
  11  16   7       2943.12       3464.20       302.29 o
  12  16   7        372.46        320.93       442.38 o
   1  17   7        181.52        303.01       295.96 o
   2  17   7        728.97        775.57       306.38 o
   3  17   7       2040.64       2250.73       359.10 o
   4  17   7        184.96        457.49       292.45 o
   5  17   7          0.66         95.06       303.55 o
   6  17   7       6449.85       6430.74       403.29 o
   7  17   7          0.32        105.25       335.53 o
   8  17   7       1803.27       1788.77       257.43 o
   9  17   7         36.59       -192.59       254.99 o
  10  17   7        497.47        -49.67       304.28 o
  11  17   7        267.62        148.70       291.21 o
   0  18   7        212.29        515.46       383.77 o
   1  18   7         25.70         43.09       283.96 o
   2  18   7         25.08        -96.77       838.51 o
   3  18   7       1210.67       1044.19       336.88 o
   4  18   7       2583.15       2658.73       320.67 o
   5  18   7       1280.65       1342.12       304.91 o
   6  18   7       2895.70       3116.52       359.00 o
   7  18   7         86.63        113.45       315.65 o
   8  18   7        546.95        725.26       261.63 o
   9  18   7       4410.44       3935.48       271.64 o
  10  18   7        405.49        546.29       384.07 o
  11  18   7       1472.41       1048.94       592.25 o
   1  19   7       1476.99       1621.75       294.22 o
   2  19   7        275.57        223.17       298.19 o
   3  19   7        212.63        467.35       329.11 o
   4  19   7        325.38        588.49       295.86 o
   5  19   7          7.99       -117.08       332.73 o
   6  19   7        506.02        601.81       297.02 o
   7  19   7         22.94        168.11       274.27 o
   8  19   7        217.71        553.43       254.55 o
   9  19   7         41.72        -39.71       244.24 o
  10  19   7         84.15        -89.97       298.26 o
   0  20   7       4695.24       4994.36       485.81 o
   1  20   7        138.71        318.36       447.68 o
   2  20   7         28.40         -4.01       540.36 o
   3  20   7       3600.71       3843.84       338.44 o
   4  20   7        488.00        546.06       300.48 o
   5  20   7        101.69        151.33       244.88 o
   6  20   7         26.72        138.85       298.18 o
   7  20   7        997.06        752.97       249.26 o
   8  20   7         40.73        -29.24       231.81 o
   9  20   7       2194.69       2026.07       279.79 o
   1  21   7        508.30        387.15       288.60 o
   2  21   7        462.74        306.08       300.91 o
   3  21   7          8.26        333.43       297.49 o
   4  21   7        105.67        196.21       250.22 o
   5  21   7        119.08        300.58       247.05 o
   6  21   7         56.62        208.46       273.43 o
   7  21   7        163.56         48.34       240.46 o
   0  22   7        133.35       -420.49       420.49 o
   1  22   7        420.45        284.52       246.66 o
   2  22   7          6.72        -38.33       241.71 o
   3  22   7        357.59         96.71       261.25 o
   4  22   7          3.42        -10.77       216.71 o
   5  22   7       1051.90        824.22       235.36 o
   6  22   7         60.57        102.05       255.33 o
   1  23   7        800.64        756.02       218.90 o
   2  23   7          4.34        246.98       241.04 o
   3  23   7        911.45        720.41       229.96 o
   0   0   8      17153.51      15132.76       783.79 o
   1   0   8       1939.29       1734.85       415.24 o
   2   0   8      53912.20      51984.69      1044.52 o
   3   0   8      11061.07      10279.47       452.95 o
   4   0   8        319.15        557.93       350.76 o
   5   0   8       4955.96       4650.28       405.24 o
   6   0   8       8118.18       7015.35      1554.16 o
   7   0   8      21407.59      20160.22       606.73 o
   8   0   8       2038.34       2222.66       325.17 o
   9   0   8       4815.58       4901.74       320.91 o
  10   0   8        248.01        443.31       284.35 o
  11   0   8       3815.05       3865.75       266.09 o
  12   0   8        277.03        509.49       269.75 o
  13   0   8        509.19        736.31       256.85 o
  14   0   8         30.31       -163.15       326.29 o
  15   0   8        459.99        923.49       320.62 o
  16   0   8        653.79        223.07       464.27 o
  17   0   8        493.91        476.01       307.93 o
   1   1   8       1122.66       1014.27       304.28 o
   2   1   8       3407.21       3764.86       295.60 o
   3   1   8       1115.69        810.44       266.44 o
   4   1   8      16676.61      16333.15       341.29 o
   5   1   8          0.71       -167.48       287.46 o
   6   1   8       2390.36       2494.35       271.21 o
   7   1   8         74.99        106.26       256.92 o
   8   1   8       2313.15       2614.01       244.58 o
   9   1   8       1312.82       1675.07       229.58 o
  10   1   8        243.22         -4.25       194.80 o
  11   1   8        507.75        427.83       169.67 o
  12   1   8         55.36        243.72       176.87 o
  13   1   8         41.21        137.56       193.62 o
  14   1   8        188.04        421.65       204.24 o
  15   1   8         68.68        164.45       220.78 o
  16   1   8         17.15        -80.50       209.64 o
  17   1   8        195.07        133.81       217.20 o
   0   2   8      12961.28      13467.35       523.88 o
   1   2   8        760.97        763.41       268.39 o
   2   2   8       4612.57       4361.89       303.98 o
   3   2   8       3376.34       3092.12       295.60 o
   4   2   8      10725.06      10516.87       320.88 o
   5   2   8        119.37         92.26       260.50 o
   6   2   8      21406.28      21732.43       350.83 o
   7   2   8       5654.82       5543.71       260.36 o
   8   2   8      33614.95      35328.46       898.11 o
   9   2   8      10755.11      10365.82       712.67 o
  10   2   8         48.32         66.30       196.35 o
  11   2   8       3723.79       3799.79       182.83 o
  12   2   8        109.74        150.67       168.99 o
  13   2   8       4345.41       4165.31       245.84 o
  14   2   8        190.06        -36.87       238.61 o
  15   2   8       1713.37       1550.79       231.97 o
  16   2   8         40.70        171.12       206.35 o
  17   2   8       1796.72       1456.97       231.04 o
   1   3   8        354.22        329.33       300.57 o
   2   3   8      37349.65      38642.95       448.80 o
   3   3   8       6686.31       6144.97       302.86 o
   4   3   8       1497.37       1471.04       276.28 o
   5   3   8        148.45        201.85       263.79 o
   6   3   8        107.96        381.57       264.66 o
   7   3   8       8124.39       8539.49       269.97 o
   8   3   8         35.96        147.90       214.31 o
   9   3   8         16.76        150.87       183.87 o
  10   3   8       1594.00       1535.58       194.66 o
  11   3   8       2073.80       2077.91       178.94 o
  12   3   8          5.39        179.73       175.50 o
  13   3   8         29.89         70.02       182.18 o
  14   3   8       1008.20        911.01       231.51 o
  15   3   8          9.62        324.82       209.83 o
  16   3   8        259.71          6.94       212.31 o
   0   4   8      85412.84      87349.99      1545.51 o
   1   4   8      36502.18      37967.92       473.83 o
   2   4   8     116899.16     112014.44       729.09 o
   3   4   8      11061.09      10365.22       310.06 o
   4   4   8       7465.67       6702.93       295.48 o
   5   4   8      17514.40      17156.43       319.01 o
   6   4   8      11405.10      11771.94       310.34 o
   7   4   8       9368.39       8970.62       261.77 o
   8   4   8      11533.07      12349.04       269.28 o
   9   4   8       8038.45       8010.76       225.21 o
  10   4   8          1.87         11.72       187.11 o
  11   4   8       6240.44       5973.48       194.82 o
  12   4   8       1843.95       1892.37       206.82 o
  13   4   8       3229.97       3468.71       197.52 o
  14   4   8        326.07        317.18       216.30 o
  15   4   8       3399.37       3281.70       233.62 o
  16   4   8          2.49        207.05       215.88 o
   1   5   8      20919.66      19469.21       347.84 o
   2   5   8      34278.89      34177.57       427.25 o
   3   5   8       1619.26       1351.23       242.95 o
   4   5   8      12487.70      11633.19      1259.38 o
   5   5   8      28850.77      28420.62       387.29 o
   6   5   8       2787.00       2812.87       407.97 o
   7   5   8       1308.19       1398.94       218.01 o
   8   5   8      19793.28      20777.71       549.37 o
   9   5   8        672.42        777.59       208.72 o
  10   5   8       5354.81       5365.08       230.80 o
  11   5   8       4676.48       4464.88       201.77 o
  12   5   8         58.39        188.27       193.18 o
  13   5   8         45.19        -84.16       176.30 o
  14   5   8        314.01        301.75       228.64 o
  15   5   8        560.32        374.54       214.53 o
  16   5   8         89.52         68.08       237.15 o
   0   6   8       5520.07       4125.37      1188.39 o
   1   6   8       2086.37       1938.32       256.65 o
   2   6   8     130306.60     127808.19      4629.67 o
   3   6   8       4089.61       3732.96       279.90 o
   4   6   8       1334.86       1276.88       275.46 o
   5   6   8      11781.75      11000.77       540.02 o
   6   6   8       7888.35       7999.88       265.25 o
   7   6   8       3635.43       3754.39       277.81 o
   8   6   8       1925.68       1987.28       210.57 o
   9   6   8       3388.98       3678.64       303.83 o
  10   6   8       1492.08       1389.22       192.49 o
  11   6   8       5583.60       5591.83       263.34 o
  12   6   8          3.46       -123.50       186.86 o
  13   6   8       2470.65       2813.62       312.45 o
  14   6   8         30.50        143.91       222.23 o
  15   6   8       1106.07        745.93       284.15 o
  16   6   8          8.12       -137.02       219.03 o
   1   7   8      14616.65      14007.14       321.32 o
   2   7   8        887.47        808.97       277.31 o
   3   7   8        907.10        651.77       255.70 o
   4   7   8       5443.10       5326.15       291.90 o
   5   7   8      18513.88      18213.75       780.59 o
   6   7   8         65.53        -38.59       211.22 o
   7   7   8       7862.92       8077.60       278.84 o
   8   7   8       4557.18       5118.03       264.74 o
   9   7   8        546.26        357.38       247.23 o
  10   7   8         10.62        277.85       289.95 o
  11   7   8         20.59        187.39       239.49 o
  12   7   8        622.76        820.04       244.31 o
  13   7   8         31.56        194.72       278.46 o
  14   7   8        774.82        757.89       293.71 o
  15   7   8         92.03         -4.91       284.30 o
  16   7   8         34.66        123.72       378.65 o
   0   8   8       9910.01       9708.62       431.93 o
   1   8   8        188.20        271.28       263.47 o
   2   8   8      23713.92      23756.67       423.47 o
   3   8   8       2285.36       2466.57       256.15 o
   4   8   8        129.87        149.12       235.37 o
   5   8   8       1280.85        812.10       232.90 o
   6   8   8       1133.41       1083.06       246.46 o
   7   8   8       3745.02       3700.82       249.36 o
   8   8   8          4.21       -160.03       243.16 o
   9   8   8       1381.50       1526.23       357.25 o
  10   8   8       2899.17       2971.48       323.07 o
  11   8   8       2894.32       2692.04       247.27 o
  12   8   8          1.99         33.16       264.37 o
  13   8   8       1412.10       1195.64       244.68 o
  14   8   8          9.35        137.74       459.33 o
  15   8   8       1207.17        940.80       287.20 o
  16   8   8         39.03        311.29       326.41 o
   1   9   8       9543.45       8776.13       298.00 o
   2   9   8        211.19        182.41       235.16 o
   3   9   8       3063.10       2699.77       244.78 o
   4   9   8       1580.97       1484.63       235.38 o
   5   9   8       3218.13       3245.35       264.12 o
   6   9   8       2656.15       2988.26       258.68 o
   7   9   8        206.50        293.50       253.72 o
   8   9   8       2986.84       2988.59       313.83 o
   9   9   8        183.42        455.93       302.85 o
  10   9   8         14.38        -30.39       300.21 o
  11   9   8        736.57       1180.44       262.53 o
  12   9   8       3348.23       3373.12       310.61 o
  13   9   8        960.90        792.17       280.92 o
  14   9   8        422.51        612.90       670.10 o
  15   9   8        714.45        362.64       428.44 o
   0  10   8        367.70        360.43       318.68 o
   1  10   8       4887.14       4555.62       236.46 o
   2  10   8       1093.38       1124.01       217.56 o
   3  10   8       1247.41       1381.14       251.27 o
   4  10   8         11.76         68.33       258.86 o
   5  10   8         30.03        208.42       264.67 o
   6  10   8        573.07        487.27       347.21 o
   7  10   8       1760.59       2004.20       314.51 o
   8  10   8         22.92        195.79       292.17 o
   9  10   8        238.03        177.61       301.17 o
  10  10   8        458.78        304.48       297.80 o
  11  10   8          9.38        316.99       467.63 o
  12  10   8        339.30        423.12       263.59 o
  13  10   8         22.20         74.67       230.68 o
  14  10   8          5.73       -343.00       416.42 o
  15  10   8        301.55        -54.62       300.57 o
   1  11   8      12496.48      11783.25       387.80 o
   2  11   8        341.90        466.25       302.09 o
   3  11   8      20921.38      22103.89       691.82 o
   4  11   8       5369.67       5421.15      1575.70 o
   5  11   8       1431.91       1767.27       357.82 o
   6  11   8       3539.76       4145.10       334.65 o
   7  11   8       1840.10       1787.83       307.90 o
   8  11   8       2516.57       2994.19       358.64 o
   9  11   8       2384.85       2499.30       317.44 o
  10  11   8       1850.54       2286.26       318.57 o
  11  11   8       1914.03       2412.08       373.06 o
  12  11   8        784.45        612.89       237.17 o
  13  11   8        264.28         52.38       295.33 o
  14  11   8        327.29        142.61       358.71 o
  15  11   8        373.70        478.07       301.08 o
   0  12   8       6118.01       5580.43       467.80 o
   1  12   8       6583.68       6748.42       336.82 o
   2  12   8       3004.31       2830.26       316.12 o
   3  12   8       3174.62       3643.33       324.77 o
   4  12   8        619.57        602.67       353.87 o
   5  12   8       7608.95       8264.04       592.25 o
   6  12   8        774.45       1113.23       349.55 o
   7  12   8       1331.25       1169.52       303.51 o
   8  12   8         30.92        195.44       293.24 o
   9  12   8        711.05        426.89       304.57 o
  10  12   8       1168.20       1140.02       581.49 o
  11  12   8         57.26         12.00       233.05 o
  12  12   8         83.74        264.87       341.39 o
  13  12   8        271.67        189.42       241.70 o
  14  12   8          3.49        326.52       291.21 o
   1  13   8       2050.82       2241.01       318.89 o
   2  13   8         17.78        167.94       289.93 o
   3  13   8       6839.15       7134.70       361.73 o
   4  13   8        435.76        482.43       300.25 o
   5  13   8      13509.78      13572.97       813.80 o
   6  13   8       4010.63       3939.07       329.24 o
   7  13   8        712.54        557.59       309.37 o
   8  13   8         68.13        437.94       303.82 o
   9  13   8        186.43        522.51       327.57 o
  10  13   8       1455.66       1612.20       261.90 o
  11  13   8         49.90        531.32       251.38 o
  12  13   8       1106.85        762.02       322.34 o
  13  13   8         23.60        152.21       297.95 o
  14  13   8        583.88        831.10       419.43 o
   0  14   8        160.95        -40.25       440.97 o
   1  14   8        950.19       1192.95       388.72 o
   2  14   8         51.62        -91.02       295.01 o
   3  14   8        375.46        373.67       303.65 o
   4  14   8        680.99        617.57       317.49 o
   5  14   8         12.69       -347.40       356.24 o
   6  14   8        615.30        537.63       260.98 o
   7  14   8         36.27         14.82       313.92 o
   8  14   8       3409.82       2926.54       378.30 o
   9  14   8        158.87        141.27       285.68 o
  10  14   8         81.43        -97.09       227.90 o
  11  14   8        158.13        118.88       240.69 o
  12  14   8        185.51        100.68       244.82 o
  13  14   8          7.28        529.91       293.42 o
   1  15   8        181.71        470.80       296.83 o
   2  15   8       4729.46       4836.34       363.66 o
   3  15   8       1736.80       1788.35       314.51 o
   4  15   8       1189.66       1989.32       463.21 o
   5  15   8       6740.43       7163.22       365.79 o
   6  15   8        129.93       -209.90       461.80 o
   7  15   8       2461.55       2527.40       313.71 o
   8  15   8        560.20        272.63       339.57 o
   9  15   8         59.88        141.34       328.68 o
  10  15   8       3178.54       3210.17       259.12 o
  11  15   8         14.32        -86.26       299.64 o
  12  15   8       2469.88       1948.87       337.61 o
  13  15   8         66.49        158.75       304.34 o
   0  16   8      13739.76      14411.82       556.42 o
   1  16   8        749.14        711.44       303.65 o
   2  16   8        119.30        245.78       304.68 o
   3  16   8       3519.47       3574.39       362.15 o
   4  16   8       1737.99       1705.16       338.19 o
   5  16   8          8.64       -125.55       300.32 o
   6  16   8       1613.62       1760.23       462.33 o
   7  16   8        374.42        386.73       333.16 o
   8  16   8         13.90        -38.84       441.32 o
   9  16   8        213.33        428.68       256.12 o
  10  16   8         18.75        193.73       233.30 o
  11  16   8        387.43        249.60       304.97 o
  12  16   8        173.31        253.53       291.40 o
   1  17   8        508.62        722.84       304.52 o
   2  17   8      10700.62       9366.62      3048.48 o
   3  17   8       6170.73       6798.64       448.91 o
   4  17   8         29.54        267.60       300.70 o
   5  17   8         32.78        172.11       306.83 o
   6  17   8         24.99       -221.81       302.72 o
   7  17   8          8.27        183.59       287.88 o
   8  17   8        322.29        270.20       296.75 o
   9  17   8        242.00        170.13       231.24 o
  10  17   8        975.99        503.20       248.02 o
  11  17   8          1.75        242.47       304.95 o
   0  18   8       1779.58       1706.33       447.32 o
   1  18   8        455.83        629.35       295.24 o
   2  18   8        906.28        654.34       310.94 o
   3  18   8       1659.99       1739.60       296.28 o
   4  18   8         57.32        260.81       299.24 o
   5  18   8          2.71       -278.83       294.45 o
   6  18   8        835.64        752.51       301.11 o
   7  18   8        148.26         81.19       313.31 o
   8  18   8        209.08         46.22       240.60 o
   9  18   8          1.73         38.64       240.07 o
  10  18   8        267.44        -61.49       351.00 o
   1  19   8       5815.93       5614.11       335.42 o
   2  19   8        769.11        946.03       342.40 o
   3  19   8       1142.78        776.44       304.59 o
   4  19   8        648.38        340.35       304.84 o
   5  19   8         52.55        445.79       334.12 o
   6  19   8          7.32         -4.94       420.49 o
   7  19   8       1110.29        943.58       324.12 o
   8  19   8        782.89        979.07       246.40 o
   9  19   8        480.45        264.69       249.00 o
  10  19   8        367.21        -18.54       286.49 o
   0  20   8        872.23       1092.71       449.09 o
   1  20   8         23.37        345.63       304.12 o
   2  20   8        389.06        181.12       474.51 o
   3  20   8        878.08       1110.15       339.36 o
   4  20   8        514.51        440.82       302.25 o
   5  20   8        557.55        459.36       348.39 o
   6  20   8          0.71        114.16       245.68 o
   7  20   8         47.33        299.67       267.16 o
   8  20   8         96.58       -188.12       274.68 o
   1  21   8       2492.75       2453.84       326.53 o
   2  21   8          9.99        114.13       342.69 o
   3  21   8       2571.13       2229.75       329.55 o
   4  21   8          8.77        -59.38       308.28 o
   5  21   8        405.27        649.41       287.40 o
   6  21   8          3.62       -108.61       255.81 o
   7  21   8         67.12         48.94       278.71 o
   0  22   8        104.04        152.87       418.37 o
   1  22   8          0.03        -24.42       291.34 o
   2  22   8          2.27        -36.52       296.23 o
   3  22   8        113.47        247.41       301.65 o
   4  22   8         52.05        104.19       250.09 o
   5  22   8       1170.70       1069.22       264.19 o
   1  23   8        784.03        494.35       277.38 o
   2  23   8        235.04        540.86       241.58 o
   3  23   8        536.67        206.92       236.24 o
   1   1   9       3424.07       3535.09       304.17 o
   2   1   9        158.75        232.85       273.98 o
   3   1   9       2490.81       2784.53       272.72 o
   4   1   9       4384.90       3915.95       277.93 o
   5   1   9        275.47        255.21       266.13 o
   6   1   9      10598.70      10439.24       293.38 o
   7   1   9       3353.36       3661.77       265.43 o
   8   1   9      11423.40      11102.65       287.67 o
   9   1   9       1681.23       2047.96       216.35 o
  10   1   9      10590.67      11074.14       258.62 o
  11   1   9         50.12        150.66       166.75 o
  12   1   9       9607.83      10252.63       216.51 o
  13   1   9        395.53        395.41       170.55 o
  14   1   9       4537.66       4308.72       207.18 o
  15   1   9        147.45        197.62       257.18 o
  16   1   9        709.53        620.38       215.52 o
   0   2   9       2239.77       2041.76       424.01 o
   1   2   9        998.77       1231.23       260.17 o
   2   2   9       2265.87       2134.29       323.68 o
   3   2   9         87.34        239.51       259.44 o
   4   2   9         28.82        -41.44       260.68 o
   5   2   9       1271.84       1393.07       276.11 o
   6   2   9       7802.47       7262.24       786.31 o
   7   2   9       9263.37      10244.40       273.24 o
   8   2   9      19340.19      20035.29       289.21 o
   9   2   9       2048.98       2549.23       235.88 o
  10   2   9        551.69        605.26       212.67 o
  11   2   9       1226.50       1166.75       188.33 o
  12   2   9        294.29        448.85       177.77 o
  13   2   9        444.36        501.44       162.28 o
  14   2   9          6.43        138.80       195.55 o
  15   2   9         43.93        251.65       219.07 o
  16   2   9        554.01        254.44       208.54 o
   1   3   9      30843.53      24584.57      2682.30 o
   2   3   9       4572.31       4729.21       294.57 o
   3   3   9      11873.58      12049.89       332.54 o
   4   3   9       4480.09       4112.71       262.59 o
   5   3   9      10628.85      11008.11       308.23 o
   6   3   9       8913.08       8838.40       289.27 o
   7   3   9       4757.58       4569.18       241.44 o
   8   3   9       5518.61       5763.62       247.74 o
   9   3   9       1356.09       1362.16       216.04 o
  10   3   9       7149.52       7555.50       231.80 o
  11   3   9        253.72        389.47       191.84 o
  12   3   9      12931.39      13077.16       255.86 o
  13   3   9         65.01        157.70       175.85 o
  14   3   9       2619.00       2311.16       211.56 o
  15   3   9         35.99         -3.36       207.86 o
  16   3   9       1045.21        669.73       259.44 o
   0   4   9        513.21        712.59       358.64 o
   1   4   9      76493.33      78375.34       588.73 o
   2   4   9       5271.85       5367.48       285.90 o
   3   4   9          6.36        -25.93       261.91 o
   4   4   9      17251.56      16566.54       390.83 o
   5   4   9        549.15        929.62       240.56 o
   6   4   9        410.86        314.22       240.96 o
   7   4   9        209.30        452.09       236.38 o
   8   4   9         87.43        205.44       213.12 o
   9   4   9       1324.40       1427.08       221.34 o
  10   4   9        623.43        872.61       203.62 o
  11   4   9       1139.33       1497.38       202.90 o
  12   4   9       4512.67       5078.67       220.33 o
  13   4   9        167.79        131.37       181.37 o
  14   4   9       1098.03        830.49       195.48 o
  15   4   9          3.92        109.41       220.83 o
  16   4   9        341.21        238.88       214.50 o
   1   5   9       3579.19       3653.04       268.38 o
   2   5   9       2881.37       2636.94       271.79 o
   3   5   9       2585.29       2372.57       333.37 o
   4   5   9        356.09        148.17       270.41 o
   5   5   9      20991.29      22709.76       355.98 o
   6   5   9      27330.31      26562.37      2089.93 o
   7   5   9         49.83        220.84       205.02 o
   8   5   9      10968.97      10592.56       354.59 o
   9   5   9         31.30        108.20       191.53 o
  10   5   9       2207.48       2379.57       212.30 o
  11   5   9       5984.05       6314.03       221.34 o
  12   5   9      12938.53      13035.67       253.41 o
  13   5   9         89.53         72.87       196.23 o
  14   5   9       3180.12       3142.74       214.51 o
  15   5   9        204.67        134.10       211.76 o
  16   5   9       1151.98        828.98       239.90 o
   0   6   9       1430.16       1056.25       362.18 o
   1   6   9       1881.71       2238.63       269.20 o
   2   6   9      37122.43      32912.61      1650.12 o
   3   6   9       9617.20       9152.02       749.80 o
   4   6   9       7888.90       7792.59       326.09 o
   5   6   9         14.07        -80.48       250.30 o
   6   6   9       6482.85       6681.83       259.16 o
   7   6   9       5024.29       5412.14       273.73 o
   8   6   9        103.76        280.50       218.76 o
   9   6   9       3851.55       3622.37       585.58 o
  10   6   9       2731.96       2918.64       202.36 o
  11   6   9        561.58        624.00       175.21 o
  12   6   9        220.98        158.69       199.23 o
  13   6   9        178.48         43.56       187.59 o
  14   6   9         61.59        161.72       204.96 o
  15   6   9        129.65         79.96       212.76 o
  16   6   9        887.40        397.84       212.99 o
   1   7   9       3701.62       3603.44       279.94 o
   2   7   9        718.83        628.25       257.89 o
   3   7   9       1449.82        967.52       257.81 o
   4   7   9      12419.65      12106.04       320.34 o
   5   7   9       1427.21       1423.98       228.77 o
   6   7   9       5850.64       5561.50       274.38 o
   7   7   9       2857.66       2695.64       247.33 o
   8   7   9       7688.91       8267.07       286.05 o
   9   7   9         91.41        244.99       244.94 o
  10   7   9       1011.32       1190.65       239.48 o
  11   7   9         38.77        199.69       294.20 o
  12   7   9       1744.80       2242.94       257.39 o
  13   7   9        107.10       -177.15       236.03 o
  14   7   9       1707.35       1857.87       248.13 o
  15   7   9        115.67         51.83       302.18 o
  16   7   9        294.16        277.30       296.76 o
   0   8   9       2226.85       2213.45       374.54 o
   1   8   9       1157.05       1040.04       259.49 o
   2   8   9       9085.40       9090.66       290.08 o
   3   8   9         29.60        162.31       233.65 o
   4   8   9      19055.32      19126.95       451.62 o
   5   8   9        184.20        127.83       215.19 o
   6   8   9        972.43        867.40       219.82 o
   7   8   9       3376.96       3525.61       270.65 o
   8   8   9        329.74        441.43       238.83 o
   9   8   9       1322.01       1454.35       234.42 o
  10   8   9       1489.53       1440.18       306.97 o
  11   8   9        175.38        184.30       431.44 o
  12   8   9          5.51        216.96       232.97 o
  13   8   9        121.05        181.79       234.77 o
  14   8   9         54.98        152.26       234.51 o
  15   8   9        153.92        190.30       308.07 o
   1   9   9       5695.81       5232.57       258.95 o
   2   9   9       1543.40       1440.53       236.06 o
   3   9   9       8609.32       8620.18       280.30 o
   4   9   9       4012.03       4131.99       243.87 o
   5   9   9        134.24        302.61       230.23 o
   6   9   9       7331.68       7685.64       298.08 o
   7   9   9         51.15         93.52       237.26 o
   8   9   9       4074.25       4045.24       248.39 o
   9   9   9        743.96       1238.95       507.52 o
  10   9   9        141.99        623.62       352.04 o
  11   9   9        106.23        338.19       288.39 o
  12   9   9       1683.63       1876.97       309.19 o
  13   9   9         88.60        225.92       262.55 o
  14   9   9        178.58        189.93       243.09 o
  15   9   9         65.91        234.57       337.74 o
   0  10   9      21292.20      19501.29       575.66 o
   1  10   9         26.95         13.51       219.50 o
   2  10   9       9764.36       9679.29       286.91 o
   3  10   9       2502.09       2310.18       237.02 o
   4  10   9      15356.93      15368.07       302.08 o
   5  10   9        179.61          8.60       224.40 o
   6  10   9      19129.12      16949.78      3390.24 o
   7  10   9         17.00         37.05       241.11 o
   8  10   9       1129.96       1289.59       369.30 o
   9  10   9       3442.48       3949.01       325.19 o
  10  10   9          6.63        123.96       305.19 o
  11  10   9       1434.46       1570.75       451.21 o
  12  10   9        139.37         80.05       234.44 o
  13  10   9        463.82        392.78       270.29 o
  14  10   9         95.23        255.58       242.01 o
  15  10   9          0.53        -92.67       301.86 o
   1  11   9       1739.41       1642.13       220.85 o
   2  11   9       1170.73       1245.06       213.27 o
   3  11   9      11996.47      12050.87       310.31 o
   4  11   9       6856.74       7398.24       294.86 o
   5  11   9         62.00         89.61       242.22 o
   6  11   9       5592.78       5477.07       431.08 o
   7  11   9       1950.52       2344.78       322.12 o
   8  11   9         10.55          8.63       285.79 o
   9  11   9        154.59        463.40       303.36 o
  10  11   9        114.70        406.58       341.41 o
  11  11   9         83.31        439.65       252.79 o
  12  11   9        115.38        288.51       237.54 o
  13  11   9        364.63        488.32       345.47 o
  14  11   9        816.42        672.01       256.57 o
   0  12   9      20924.01      21195.83       620.32 o
   1  12   9        659.85        800.29       290.32 o
   2  12   9      14848.45      14973.01       394.10 o
   3  12   9          0.33        -94.58       303.55 o
   4  12   9       7877.93       6644.64       995.27 o
   5  12   9         13.84        236.00       302.75 o
   6  12   9       1517.18       1377.77       315.78 o
   7  12   9        134.54        495.71       336.49 o
   8  12   9        577.38        595.69       308.85 o
   9  12   9        213.09        220.16       406.55 o
  10  12   9       1410.13       1347.27       432.14 o
  11  12   9        991.74       1096.05       240.61 o
  12  12   9        276.65        114.74       299.78 o
  13  12   9         30.93       -149.67       245.30 o
  14  12   9          1.00        140.87       413.08 o
   1  13   9        326.80        360.96       299.45 o
   2  13   9        133.54         46.44       295.48 o
   3  13   9        160.04        606.61       325.17 o
   4  13   9       1372.93       1516.87       308.44 o
   5  13   9       1971.78       2308.86       376.84 o
   6  13   9       4053.55       3915.83       331.88 o
   7  13   9       6842.37       6874.37       352.97 o
   8  13   9        594.30        523.21       295.48 o
   9  13   9        402.36        142.12       277.41 o
  10  13   9         48.21        189.60       279.01 o
  11  13   9       1341.75       1599.40       320.98 o
  12  13   9       2013.30       2021.33       281.46 o
  13  13   9        288.79        320.62       242.34 o
  14  13   9        424.40        100.62       446.27 o
   0  14   9       4367.69       4289.65       581.84 o
   1  14   9       2453.85       2322.62       374.51 o
   2  14   9      14072.53      14636.70       565.60 o
   3  14   9          4.62        185.17       301.70 o
   4  14   9       2468.26       2585.45       338.47 o
   5  14   9          1.41        -77.32       357.08 o
   6  14   9        146.02        257.22       279.23 o
   7  14   9        572.30        470.69       307.71 o
   8  14   9        327.78        253.59       306.11 o
   9  14   9        206.10        297.68       323.65 o
  10  14   9       2767.23       2692.06       314.73 o
  11  14   9       1769.80       1677.27       317.60 o
  12  14   9         19.93       -203.80       244.50 o
  13  14   9          2.97       -206.57       309.42 o
   1  15   9       2894.57       2690.55       319.12 o
   2  15   9       7444.37       8017.83       339.00 o
   3  15   9         17.54         -5.41       303.74 o
   4  15   9        125.70        370.68       298.14 o
   5  15   9       2885.95       3282.55       328.60 o
   6  15   9        965.90       1079.27       272.85 o
   7  15   9        266.53        420.19       361.88 o
   8  15   9        206.04        200.52       284.29 o
   9  15   9         38.72         64.42       317.20 o
  10  15   9       1092.29       1136.34       294.38 o
  11  15   9          3.63       -213.85       295.35 o
  12  15   9        227.28          0.38       247.02 o
  13  15   9        531.70       -230.55       426.49 o
   0  16   9        314.55        663.04       436.73 o
   1  16   9        388.60        529.75       308.54 o
   2  16   9         65.37        115.07       300.63 o
   3  16   9       1513.85       1388.25       312.90 o
   4  16   9       5840.67       6792.43       385.74 o
   5  16   9       1149.70       1279.36       386.07 o
   6  16   9       5505.28       5227.57       403.03 o
   7  16   9       1090.78       1481.71       313.69 o
   8  16   9        586.59        821.48       394.54 o
   9  16   9        123.18        238.58       302.09 o
  10  16   9        946.34        841.08       235.94 o
  11  16   9        351.87        294.56       344.41 o
  12  16   9         14.31       -117.86       269.46 o
   1  17   9         12.08         74.24       284.46 o
   2  17   9       5498.76       5867.06       356.07 o
   3  17   9        202.59        370.83       302.29 o
   4  17   9        640.26        586.95       381.66 o
   5  17   9          4.55         36.12       308.67 o
   6  17   9        207.28        407.69       297.84 o
   7  17   9        136.07        749.16       450.85 o
   8  17   9         64.65         79.08       440.26 o
   9  17   9          2.72        109.30       238.16 o
  10  17   9         60.20        120.63       236.00 o
  11  17   9        184.62        287.48       308.60 o
   0  18   9        612.78        330.46       409.55 o
   1  18   9       5062.96       5238.76       323.17 o
   2  18   9       2472.56       2940.65       318.43 o
   3  18   9       1156.17       1277.29       350.72 o
   4  18   9       6617.11       7021.09       343.99 o
   5  18   9         85.79        263.30       292.37 o
   6  18   9       5118.39       4951.69       772.31 o
   7  18   9       1438.36        777.79       452.62 o
   8  18   9        132.50        -23.30       451.56 o
   9  18   9        259.73          8.48       295.88 o
  10  18   9          2.00        202.23       233.99 o
   1  19   9        650.06        891.06       341.93 o
   2  19   9        146.08         32.95       287.85 o
   3  19   9          0.61         30.44       309.18 o
   4  19   9        256.59        182.80       298.36 o
   5  19   9         30.41       -113.61       292.18 o
   6  19   9         21.08        191.26       314.36 o
   7  19   9        123.56        393.31       462.15 o
   8  19   9        177.01        295.63       298.31 o
   9  19   9         48.55         53.07       245.98 o
   0  20   9       6011.07       6913.93       488.99 o
   1  20   9        330.30        118.47       285.82 o
   2  20   9       5121.86       5703.61       345.04 o
   3  20   9         55.88        573.23       303.29 o
   4  20   9       4941.22       4400.24      1052.82 o
   5  20   9        768.33        659.87       438.14 o
   6  20   9        614.19        486.51       486.87 o
   7  20   9         12.81        117.93       311.04 o
   8  20   9        544.01       1056.10       281.30 o
   1  21   9          0.76        174.27       299.74 o
   2  21   9          0.65       -177.75       299.65 o
   3  21   9         33.55        -69.22       300.31 o
   4  21   9         15.91        274.46       299.76 o
   5  21   9        103.38         41.01       304.45 o
   6  21   9        248.71        169.16       238.90 o
   7  21   9        385.96        583.06       265.28 o
   0  22   9       1269.11        953.61       448.03 o
   1  22   9         28.97       -347.14       347.14 o
   2  22   9       2980.57       2903.35       331.12 o
   3  22   9          0.52        396.48       636.21 o
   4  22   9        752.67        725.97       319.60 o
   5  22   9         28.43        122.61       249.25 o
   1  23   9         50.62        -15.78       312.46 o
   2  23   9         87.42        191.01       308.32 o
   0   0  10      66374.71      64570.04      1075.77 o
   1   0  10       2308.09       2178.82       345.80 o
   2   0  10       2002.75       2339.04       391.95 o
   3   0  10       7771.50       7294.02       411.42 o
   4   0  10      25569.32      24386.99       506.25 o
   5   0  10          9.92        372.82       446.34 o
   6   0  10       9966.79       9822.68       402.36 o
   7   0  10       1071.53       1247.62       326.64 o
   8   0  10       6650.37       6654.51       333.81 o
   9   0  10        237.20       -182.05       345.47 o
  10   0  10       5135.92       5385.59       433.55 o
  11   0  10       1501.01       1532.25       311.98 o
  12   0  10       2075.89       2068.44       265.25 o
  13   0  10        163.22        119.05       233.81 o
  14   0  10       4866.45       4801.44       419.38 o
  15   0  10         41.34         19.30       286.89 o
  16   0  10        106.75        426.04       351.08 o
   1   1  10          4.20        192.24       280.24 o
   2   1  10      18685.77      17623.42       705.53 o
   3   1  10       1759.14       1569.23       266.04 o
   4   1  10      12899.06      13087.33       342.92 o
   5   1  10        776.66        825.84       272.15 o
   6   1  10       2253.61       2374.43       261.10 o
   7   1  10       1877.34       1988.95       237.85 o
   8   1  10        220.08        232.53       207.24 o
   9   1  10       1718.70       1850.37       216.37 o
  10   1  10        563.06        306.45       219.99 o
  11   1  10         23.17        295.94       184.16 o
  12   1  10        258.44        321.62       175.87 o
  13   1  10        134.41        137.72       170.06 o
  14   1  10        220.70        282.99       169.04 o
  15   1  10        371.66        304.20       210.31 o
  16   1  10         26.42        136.99       209.98 o
   0   2  10       1864.45       2351.97       465.17 o
   1   2  10        669.84        486.31       249.04 o
   2   2  10       2183.50       1814.13       274.24 o
   3   2  10        837.45        694.61       241.83 o
   4   2  10        116.14       -112.58       275.05 o
   5   2  10        687.17        682.55       274.86 o
   6   2  10        845.12        626.17       268.93 o
   7   2  10       3654.69       3467.00       241.12 o
   8   2  10        741.46        824.07       223.82 o
   9   2  10       4468.97       4791.51       244.04 o
  10   2  10        476.62        687.74       207.65 o
  11   2  10       2260.94       2173.87       197.53 o
  12   2  10        510.03        581.25       175.96 o
  13   2  10       1342.90       1519.55       165.24 o
  14   2  10        216.12        179.05       179.22 o
  15   2  10        136.60         74.19       208.46 o
  16   2  10       1032.36        472.20       231.83 o
   1   3  10         89.23        110.78       263.49 o
   2   3  10      29290.33      28556.05       401.20 o
   3   3  10      15473.47      14806.25       344.38 o
   4   3  10         85.19        -88.62       253.20 o
   5   3  10       2304.16       2415.74       275.26 o
   6   3  10       6136.91       5969.81       285.79 o
   7   3  10       2092.80       2725.11       237.09 o
   8   3  10       5527.98       5636.94       372.41 o
   9   3  10        376.33        584.44       284.51 o
  10   3  10       1212.34       1488.59       219.22 o
  11   3  10         53.73        146.92       194.63 o
  12   3  10       2908.45       2793.59       178.95 o
  13   3  10       2428.39       2307.53       173.58 o
  14   3  10        382.93        388.82       189.56 o
  15   3  10         49.54        110.14       210.04 o
  16   3  10          5.80         70.59       252.96 o
   0   4  10      23902.45      21177.93      1919.40 o
   1   4  10        304.78        362.08       255.60 o
   2   4  10     125980.49     122931.02      1055.87 o
   3   4  10        128.35        297.52       271.76 o
   4   4  10      27497.89      25325.38       744.37 o
   5   4  10       3505.76       3637.95       276.09 o
   6   4  10       4904.90       4962.82       255.28 o
   7   4  10       3741.03       3989.70       248.48 o
   8   4  10       5487.10       5626.88       240.52 o
   9   4  10       4963.17       5696.79       244.42 o
  10   4  10       7091.96       6980.87       233.29 o
  11   4  10        216.85        168.33       187.44 o
  12   4  10       4155.21       4387.65       227.47 o
  13   4  10       4054.69       3848.86       209.83 o
  14   4  10       1077.77       1043.29       193.32 o
  15   4  10          4.85         -5.81       195.48 o
  16   4  10        285.20        159.79       248.27 o
   1   5  10       6719.24       6600.38       291.48 o
   2   5  10         73.93        102.55       266.92 o
   3   5  10        324.49        270.23       278.65 o
   4   5  10       3462.18       3937.05       382.20 o
   5   5  10        131.25        320.98       264.01 o
   6   5  10        691.55        600.09       249.06 o
   7   5  10        938.25        940.11       204.79 o
   8   5  10       4410.77       4475.94       250.41 o
   9   5  10        472.02        612.48       218.40 o
  10   5  10       4011.77       4255.51       215.37 o
  11   5  10         23.34       -198.86       198.86 o
  12   5  10          5.84        189.41       175.94 o
  13   5  10          0.11        135.19       184.96 o
  14   5  10         60.24        -22.31       176.84 o
  15   5  10          1.72       -196.35       196.35 o
  16   5  10          2.33        151.49       226.48 o
   0   6  10     178990.88     180944.52      1045.23 o
   1   6  10       1045.14        753.37       285.74 o
   2   6  10      73102.37      72503.07       778.86 o
   3   6  10        198.86        660.47       237.56 o
   4   6  10       9481.74      10729.51       318.06 o
   5   6  10       9677.80       9329.33       283.03 o
   6   6  10       4403.26       4223.94       254.10 o
   7   6  10         30.83         48.53       221.42 o
   8   6  10      18581.24      18878.84       784.67 o
   9   6  10       5561.45       5575.73       237.87 o
  10   6  10        324.70        107.20       186.79 o
  11   6  10        259.81        208.01       180.21 o
  12   6  10         67.13         77.54       169.54 o
  13   6  10       2019.43       1666.36       208.09 o
  14   6  10        151.50        211.95       211.33 o
  15   6  10        166.31        -22.52       178.25 o
  16   6  10        348.25        132.70       242.11 o
   1   7  10      11003.27       9028.18      1087.13 o
   2   7  10      26946.60      27355.05      1200.57 o
   3   7  10        578.28        745.86       250.58 o
   4   7  10       5713.48       5959.61       276.45 o
   5   7  10        349.68        385.33       223.31 o
   6   7  10        174.74         90.30       215.65 o
   7   7  10        245.87        157.29       206.96 o
   8   7  10       2713.47       2785.80       351.11 o
   9   7  10         80.01         34.83       249.95 o
  10   7  10        811.47        864.37       236.41 o
  11   7  10        477.93        425.54       249.13 o
  12   7  10         98.63        309.61       241.27 o
  13   7  10         19.14       -231.26       231.26 o
  14   7  10        224.18        304.73       237.95 o
  15   7  10         69.53         -3.22       241.41 o
  16   7  10        515.63        686.48       295.32 o
   0   8  10       7252.11       7250.71       408.89 o
   1   8  10        580.43        564.21       249.72 o
   2   8  10      15913.54      16934.97       324.12 o
   3   8  10       3025.33       2948.25       243.37 o
   4   8  10        139.47        486.51       210.71 o
   5   8  10         85.48        291.00       221.76 o
   6   8  10         17.59        -11.02       219.72 o
   7   8  10       3767.17       4245.68       272.50 o
   8   8  10        149.81        359.29       259.80 o
   9   8  10       2644.24       2895.86       250.66 o
  10   8  10          8.74        108.44       235.78 o
  11   8  10        266.97        542.30       419.08 o
  12   8  10        151.95        434.82       236.04 o
  13   8  10        688.31        650.39       298.89 o
  14   8  10        103.83        323.19       241.11 o
  15   8  10        946.40       1032.80       272.67 o
   1   9  10       6434.85       6732.21       297.04 o
   2   9  10       1751.81       1446.68       231.14 o
   3   9  10       2537.92       2574.75       243.94 o
   4   9  10       6546.78       6378.24       252.63 o
   5   9  10        129.92        331.57       221.76 o
   6   9  10       1450.95       1190.10       219.78 o
   7   9  10       2673.68       2797.04       255.73 o
   8   9  10        147.76        326.91       231.74 o
   9   9  10        390.92        324.21       341.13 o
  10   9  10         75.46         33.18       339.73 o
  11   9  10         79.13        146.16       332.66 o
  12   9  10       2583.14       2843.17       314.84 o
  13   9  10        419.07        505.18       269.25 o
  14   9  10       2489.36       2476.34       261.91 o
  15   9  10        136.00        174.37       508.23 o
   0  10  10       8723.74       7989.59      1421.94 o
   1  10  10        687.71        665.36       223.05 o
   2  10  10       8212.92       7411.92       669.97 o
   3  10  10        674.47        791.59       214.32 o
   4  10  10       9919.44      10043.22       276.33 o
   5  10  10        570.18        634.36       222.69 o
   6  10  10       2520.49       2289.92       328.13 o
   7  10  10       4333.69       4497.59       256.27 o
   8  10  10        374.70        339.59       282.19 o
   9  10  10       2436.42       2573.41       310.70 o
  10  10  10          1.04        376.40       334.52 o
  11  10  10        229.25        -25.07       424.02 o
  12  10  10          0.13        120.44       242.56 o
  13  10  10          2.92         21.63       285.22 o
  14  10  10        272.88        -74.87       235.87 o
  15  10  10        420.18        382.74       353.52 o
   1  11  10         53.60        209.40       209.39 o
   2  11  10       1076.59        886.90       209.12 o
   3  11  10       2247.96       2356.78       214.48 o
   4  11  10        698.77        636.80       256.02 o
   5  11  10        937.07        684.42       226.38 o
   6  11  10        942.55       1147.01       252.65 o
   7  11  10       1565.56       1556.30       312.79 o
   8  11  10       4198.54       4703.96       324.30 o
   9  11  10         27.16         98.21       301.43 o
  10  11  10       2909.22       3049.69       352.30 o
  11  11  10        462.30        349.63       286.02 o
  12  11  10       2812.46       2770.45       255.48 o
  13  11  10         20.71       -244.97       244.97 o
  14  11  10       1513.60       1589.96       254.50 o
   0  12  10       2227.69       2011.37       321.65 o
   1  12  10        382.04        297.10       223.62 o
   2  12  10         36.76        118.16       241.05 o
   3  12  10          6.21         29.55       240.97 o
   4  12  10       1345.70       1385.32       246.76 o
   5  12  10       1278.77        875.96       377.03 o
   6  12  10        397.92        430.81       369.48 o
   7  12  10        850.28       1049.31       347.47 o
   8  12  10       1941.36       1997.51       303.88 o
   9  12  10       1251.74       1630.03       297.33 o
  10  12  10        341.11        545.43       319.66 o
  11  12  10        147.61        529.09       383.60 o
  12  12  10        173.81        198.26       245.01 o
  13  12  10        153.20        420.32       245.24 o
  14  12  10          0.22          6.71       294.09 o
   1  13  10        527.41        456.38       307.06 o
   2  13  10       1417.17       1742.03       363.20 o
   3  13  10       6926.67       7332.67       353.73 o
   4  13  10         13.11         78.60       376.55 o
   5  13  10       3035.27       3245.73       341.30 o
   6  13  10       1985.76       1857.03       500.81 o
   7  13  10        588.26        491.69       306.78 o
   8  13  10        512.87        645.53       299.67 o
   9  13  10          7.78        212.73       285.46 o
  10  13  10       4617.79       4000.43       322.00 o
  11  13  10         68.00        272.80       295.04 o
  12  13  10       2229.99       2211.66       249.83 o
  13  13  10         22.51        -64.71       307.29 o
   0  14  10        542.62       1013.98       448.38 o
   1  14  10        204.56          6.02       308.51 o
   2  14  10       5658.01       5141.67      1575.52 o
   3  14  10        586.97        506.43       318.18 o
   4  14  10        392.41        222.24       298.44 o
   5  14  10        530.89        535.57       354.30 o
   6  14  10       1925.95       2418.22       323.66 o
   7  14  10         36.09         88.15       306.52 o
   8  14  10        320.85        126.03       405.66 o
   9  14  10        215.46         16.66       282.25 o
  10  14  10        181.18        406.68       290.93 o
  11  14  10        576.42        478.54       299.76 o
  12  14  10          0.01        167.96       239.50 o
  13  14  10        501.47         46.00       367.97 o
   1  15  10        823.99        753.72       312.91 o
   2  15  10       4941.69       5739.39       328.58 o
   3  15  10        214.30        549.52       306.04 o
   4  15  10         56.11         61.11       305.09 o
   5  15  10       3053.01       3297.72       326.69 o
   6  15  10       5587.09       5428.52       900.18 o
   7  15  10        192.95        726.81       308.98 o
   8  15  10        961.05        801.55       299.14 o
   9  15  10       1100.93        762.96       430.02 o
  10  15  10       2713.32       2977.10       373.54 o
  11  15  10          1.53          5.66       287.28 o
  12  15  10       2432.41       2374.50       286.14 o
   0  16  10       1809.39       2031.49       443.09 o
   1  16  10        279.79        528.03       383.24 o
   2  16  10        965.46       1068.73       314.93 o
   3  16  10        343.33        580.66       354.26 o
   4  16  10       2199.79       1996.97       301.61 o
   5  16  10        890.32        608.37       298.01 o
   6  16  10        355.55        159.54       258.29 o
   7  16  10       1188.12        884.17       300.28 o
   8  16  10         24.41        -26.46       298.86 o
   9  16  10        857.18        750.60       421.55 o
  10  16  10         64.22         91.35       236.25 o
  11  16  10          0.28        263.06       265.96 o
  12  16  10        742.64        902.44       275.45 o
   1  17  10         79.30        182.96       290.44 o
   2  17  10       2282.29       1707.08       532.59 o
   3  17  10       3674.62       3761.63       382.81 o
   4  17  10          7.96        208.34       287.33 o
   5  17  10        211.83        406.45       291.34 o
   6  17  10       6506.87       6751.56       994.92 o
   7  17  10         60.80         55.42       307.29 o
   8  17  10       2684.36       2786.90       348.29 o
   9  17  10       1877.34       1409.41       646.45 o
  10  17  10       2356.45       1678.88       257.73 o
  11  17  10         65.60        276.58       269.22 o
   0  18  10        432.72        168.06       439.56 o
   1  18  10       2261.59       1975.76       307.17 o
   2  18  10       3670.90       3503.09       408.66 o
   3  18  10          0.70         85.52       292.76 o
   4  18  10          1.23        -52.81       330.45 o
   5  18  10         12.41         59.58       336.55 o
   6  18  10         14.04        233.40       304.38 o
   7  18  10       1603.62       1722.28       334.08 o
   8  18  10        209.53        241.84       449.44 o
   9  18  10        303.02        -37.44       400.01 o
  10  18  10        165.05        179.70       247.59 o
   1  19  10       5105.33       5199.65       345.22 o
   2  19  10       1548.27       1819.07       358.18 o
   3  19  10       2013.95       2685.41       366.80 o
   4  19  10        487.85        132.16       309.37 o
   5  19  10       2174.53       1929.28       310.66 o
   6  19  10        264.80        274.81       292.90 o
   7  19  10         28.73       -195.83       353.90 o
   8  19  10       2188.31       1490.26       478.75 o
   9  19  10        328.62        258.76       276.62 o
   0  20  10         37.96        120.39       437.44 o
   1  20  10          8.90        102.82       290.39 o
   2  20  10        118.25        281.68       283.51 o
   3  20  10          0.35         32.33       340.60 o
   4  20  10        200.17        -16.89       297.47 o
   5  20  10        107.47        114.39       438.50 o
   6  20  10        674.32        381.30       481.92 o
   7  20  10         20.91        358.35       472.04 o
   8  20  10         25.83        245.55       352.18 o
   1  21  10       1061.72        657.96       313.29 o
   2  21  10        895.62        834.18       316.07 o
   3  21  10        117.19        123.59       302.14 o
   4  21  10       1076.95       1004.29       306.11 o
   5  21  10          2.76        310.16       449.62 o
   6  21  10        683.04        231.09       419.61 o
   7  21  10          1.45        314.61       255.07 o
   0  22  10        271.23          5.65       591.02 o
   1  22  10         31.18        165.31       297.41 o
   2  22  10        606.39        555.76       317.40 o
   3  22  10         43.16       -113.33       429.32 o
   4  22  10         76.50       -218.37       355.76 o
   5  22  10        238.95        236.31       301.98 o
   1  23  10        278.89        631.24       320.78 o
   2  23  10         49.60         62.26       310.81 o
   1   1  11       3489.01       3218.93       285.38 o
   2   1  11         19.73         32.80       237.05 o
   3   1  11      17061.76      15636.10       351.52 o
   4   1  11        325.32        238.18       275.33 o
   5   1  11       7778.18       7774.52       293.67 o
   6   1  11        591.57        791.43       252.93 o
   7   1  11       4082.80       4135.91       578.54 o
   8   1  11        887.49        636.40       208.26 o
   9   1  11         38.75        113.75       205.30 o
  10   1  11        834.53        793.06       203.01 o
  11   1  11        175.04        375.68       223.60 o
  12   1  11        315.59        574.67       167.92 o
  13   1  11        190.50        170.77       163.92 o
  14   1  11         18.83        118.14       163.24 o
  15   1  11        284.15        257.35       199.45 o
  16   1  11        176.95         -0.09       224.30 o
   0   2  11       2666.89       2335.90       388.33 o
   1   2  11        472.14        492.96       268.22 o
   2   2  11        127.18         77.04       266.37 o
   3   2  11        847.30        644.12       254.88 o
   4   2  11        379.79        562.91       274.91 o
   5   2  11       4072.37       4640.99       276.46 o
   6   2  11        426.37        570.11       244.24 o
   7   2  11       1066.72        990.61       244.03 o
   8   2  11        231.96        261.26       226.11 o
   9   2  11        981.11       1050.65       237.61 o
  10   2  11       7209.43       7365.84       276.10 o
  11   2  11          6.46       -162.41       202.32 o
  12   2  11       1562.10       1621.94       202.48 o
  13   2  11         10.63       -108.81       168.89 o
  14   2  11         25.44        225.82       172.65 o
  15   2  11         10.41        100.27       184.75 o
  16   2  11         86.73        106.21       221.87 o
   1   3  11      25733.90      24291.07       376.08 o
   2   3  11      17840.87      17432.84       337.82 o
   3   3  11      16049.77      15404.88       335.00 o
   4   3  11       2275.31       2381.59       272.27 o
   5   3  11      17368.56      16665.79       331.74 o
   6   3  11       1848.65       2012.83       250.31 o
   7   3  11       4553.41       4678.07       236.38 o
   8   3  11        317.02        388.63       215.08 o
   9   3  11       8692.68       8804.63       259.05 o
  10   3  11        155.80        158.85       232.57 o
  11   3  11        635.18        305.48       189.66 o
  12   3  11          6.13         77.52       200.26 o
  13   3  11        720.79        893.97       173.62 o
  14   3  11        217.60        284.42       179.50 o
  15   3  11         52.68        257.93       190.63 o
  16   3  11        285.31        371.63       212.66 o
   0   4  11         12.67        -86.29       362.29 o
   1   4  11      21754.99      21063.38       352.40 o
   2   4  11         11.40       -125.23       253.72 o
   3   4  11      21720.09      21232.48       634.21 o
   4   4  11       8191.76       7131.59      1623.32 o
   5   4  11      31652.24      32883.66       368.07 o
   6   4  11       3625.35       3613.39       226.72 o
   7   4  11         17.79        105.83       235.88 o
   8   4  11       1704.92       1625.69       229.93 o
   9   4  11        553.58        262.66       228.37 o
  10   4  11        593.64        624.52       219.21 o
  11   4  11        152.39        389.49       240.00 o
  12   4  11         57.66         70.66       184.79 o
  13   4  11         40.88        -10.75       170.40 o
  14   4  11        462.12        476.22       203.84 o
  15   4  11         26.93        199.64       184.20 o
  16   4  11          0.22         38.93       219.81 o
   1   5  11      14437.97      13051.48      1333.15 o
   2   5  11        943.80        909.53       288.65 o
   3   5  11      51985.95      45598.48      5826.46 o
   4   5  11       1020.52       1044.30       262.51 o
   5   5  11       9957.19       9389.33       276.23 o
   6   5  11        548.89        308.22       225.92 o
   7   5  11        823.92        933.64       223.89 o
   8   5  11         84.42        181.76       209.77 o
   9   5  11       3021.39       3061.52       236.02 o
  10   5  11       1103.81       1170.81       205.86 o
  11   5  11          8.76        322.32       195.45 o
  12   5  11        537.61        802.02       177.37 o
  13   5  11         93.64        169.83       167.39 o
  14   5  11       2193.49       1974.38       211.22 o
  15   5  11        103.68        164.77       191.70 o
  16   5  11       2512.53       2043.65       248.52 o
   0   6  11      51395.20      51508.97       639.21 o
   1   6  11         78.20        196.98       277.44 o
   2   6  11       1193.01        732.09       268.94 o
   3   6  11      12109.85      12136.00       283.44 o
   4   6  11      10498.46      11901.13       333.07 o
   5   6  11       2180.96       2301.41       237.82 o
   6   6  11        376.00        647.61       212.68 o
   7   6  11       4753.39       5154.00       243.37 o
   8   6  11       1008.49       1019.87       220.90 o
   9   6  11        923.61        767.58       228.50 o
  10   6  11       3560.30       3145.31       337.30 o
  11   6  11         16.33         32.38       179.05 o
  12   6  11        242.34        359.17       177.32 o
  13   6  11         64.44        225.40       188.55 o
  14   6  11        296.91        393.64       175.71 o
  15   6  11          6.15        169.97       198.55 o
  16   6  11         48.84        120.85       210.18 o
   1   7  11      18927.52      18547.11       336.57 o
   2   7  11         46.45        290.89       266.09 o
   3   7  11      26102.72      25231.36       356.89 o
   4   7  11       1948.20       1979.57       235.20 o
   5   7  11       9126.95       8897.48       263.71 o
   6   7  11       2743.70       2908.61       233.13 o
   7   7  11        703.40        686.19       227.31 o
   8   7  11        148.98        248.70       228.55 o
   9   7  11       2348.32       2263.15       217.47 o
  10   7  11          5.21        -76.82       198.00 o
  11   7  11       1524.61       1500.39       311.79 o
  12   7  11         97.72        351.65       425.79 o
  13   7  11        728.50        650.63       236.95 o
  14   7  11        274.28        335.36       243.81 o
  15   7  11        826.22        544.85       250.36 o
   0   8  11       3895.21       4941.31       376.88 o
   1   8  11        935.96        933.24       248.17 o
   2   8  11        123.95        -56.47       230.32 o
   3   8  11       5534.31       6181.01       282.41 o
   4   8  11       1414.29       1418.14       206.39 o
   5   8  11       2625.33       2599.83       244.32 o
   6   8  11         53.75        -88.02       229.05 o
   7   8  11       8638.87       8549.04       270.35 o
   8   8  11        192.60        253.61       218.79 o
   9   8  11       4878.03       5164.38       261.05 o
  10   8  11        451.57        689.42       260.87 o
  11   8  11       4715.67       5098.68       334.71 o
  12   8  11        368.60        574.81       290.67 o
  13   8  11       1627.97       1447.69       314.62 o
  14   8  11        250.08        183.79       237.04 o
  15   8  11         46.47        129.33       244.93 o
   1   9  11      15015.88      15530.09       292.69 o
   2   9  11       1228.23       1107.66       228.96 o
   3   9  11       3502.35       3240.71       236.61 o
   4   9  11        709.30        486.48       257.54 o
   5   9  11       3117.32       3155.90       235.07 o
   6   9  11       1483.89       1425.70       217.62 o
   7   9  11       6346.87       6368.29       530.03 o
   8   9  11       3875.75       4150.77       271.26 o
   9   9  11        732.31        998.84       355.09 o
  10   9  11        400.00        466.68       266.66 o
  11   9  11       2929.29       3225.56       310.66 o
  12   9  11       1366.04       1418.94       441.32 o
  13   9  11          9.60        345.73       230.62 o
  14   9  11        320.37         89.49       266.93 o
  15   9  11        170.41        268.36       251.58 o
   0  10  11       1372.37       1543.53       312.58 o
   1  10  11        114.53         43.80       228.69 o
   2  10  11        557.34        658.25       216.87 o
   3  10  11        943.56        942.61       217.29 o
   4  10  11        431.44        640.54       224.55 o
   5  10  11        305.09        552.70       213.32 o
   6  10  11        902.37        722.88       281.93 o
   7  10  11        411.83        503.72       273.30 o
   8  10  11        908.94        927.59       237.72 o
   9  10  11       1828.22       2468.60       256.70 o
  10  10  11        660.35        595.44       299.47 o
  11  10  11       6519.53       7294.18       653.51 o
  12  10  11        145.80        458.05       285.39 o
  13  10  11        936.80        911.61       304.90 o
  14  10  11        203.80         77.62       239.51 o
  15  10  11         67.60        165.04       254.90 o
   1  11  11       5969.36       5830.89       235.78 o
   2  11  11        208.28        427.05       222.90 o
   3  11  11       2874.35       2888.69       237.45 o
   4  11  11        114.16        246.70       209.92 o
   5  11  11       1616.76       2001.40       242.49 o
   6  11  11         85.74        152.48       260.02 o
   7  11  11       5288.64       5155.92       255.47 o
   8  11  11        720.86       1139.41       237.51 o
   9  11  11          7.52        -78.65       288.72 o
  10  11  11        782.10       1568.12       352.70 o
  11  11  11       1752.79       2079.13       297.03 o
  12  11  11       1029.29        296.03       567.01 o
  13  11  11         53.44         99.60       240.23 o
  14  11  11          1.31        121.75       360.83 o
   0  12  11        214.83        645.31       296.43 o
   1  12  11        884.48        894.08       242.73 o
   2  12  11         28.01         56.83       206.41 o
   3  12  11       1227.75       1374.05       214.54 o
   4  12  11       7632.99       7791.16       310.88 o
   5  12  11       3222.98       3227.71       277.96 o
   6  12  11       3604.40       4119.33       261.15 o
   7  12  11         26.60       -200.55       357.88 o
   8  12  11       4034.03       4122.01       467.80 o
   9  12  11       4831.01       5307.28       327.52 o
  10  12  11        631.27        648.73       284.45 o
  11  12  11       5814.18       6255.59       355.25 o
  12  12  11          3.62       -182.35       236.93 o
  13  12  11       1987.96       2260.21       323.28 o
  14  12  11        139.39        346.89       307.91 o
   1  13  11       1589.72       1660.90       254.65 o
   2  13  11       2416.43       2239.86       240.97 o
   3  13  11       1551.19       1373.80       249.81 o
   4  13  11       3761.48       4427.47       432.67 o
   5  13  11       1529.73       1558.60       383.60 o
   6  13  11       1021.01        904.73       320.79 o
   7  13  11       3086.06       2539.76       610.44 o
   8  13  11         84.30       -245.19       320.58 o
   9  13  11         44.54        100.66       285.14 o
  10  13  11       3667.17       3974.26       404.07 o
  11  13  11        242.57         34.95       591.37 o
  12  13  11          0.80       -128.96       241.89 o
  13  13  11         44.10        -39.15       301.43 o
   0  14  11       8343.23       8328.99       512.29 o
   1  14  11        174.34       -150.33       361.19 o
   2  14  11        299.76        346.85       312.48 o
   3  14  11       1630.44       1792.37       311.92 o
   4  14  11        955.44        991.32       326.07 o
   5  14  11        639.78        514.40       428.08 o
   6  14  11       2636.06       3032.31       361.17 o
   7  14  11        956.83       1205.82       348.56 o
   8  14  11         39.82        443.16       331.34 o
   9  14  11       2903.40       3008.90       321.99 o
  10  14  11        144.98        324.09       305.22 o
  11  14  11       1565.63       1706.20       311.94 o
  12  14  11         13.09        178.24       243.35 o
  13  14  11       2269.62       1719.82       342.14 o
   1  15  11       4209.25       4124.40       334.64 o
   2  15  11      14478.86      15055.42       774.26 o
   3  15  11        344.22        546.31       311.51 o
   4  15  11         28.08       -158.30       305.14 o
   5  15  11         46.26        125.85       303.06 o
   6  15  11         34.53       -154.65       253.03 o
   7  15  11        326.89        323.13       301.59 o
   8  15  11        574.44        814.71       290.35 o
   9  15  11       1101.01        184.65       446.62 o
  10  15  11       1462.68       1472.13       297.27 o
  11  15  11          5.34         96.99       255.61 o
  12  15  11         99.18        193.86       312.75 o
   0  16  11       3463.00       3313.09       467.45 o
   1  16  11       9440.38      11198.85       986.97 o
   2  16  11        791.15       1007.65       321.39 o
   3  16  11        285.81        635.66       302.89 o
   4  16  11        720.59        474.13       491.10 o
   5  16  11        152.48        415.09       295.71 o
   6  16  11         16.66        390.33       248.83 o
   7  16  11        446.89        -15.43       300.31 o
   8  16  11          5.66       -264.56       300.64 o
   9  16  11       4016.96       3750.89       512.64 o
  10  16  11        416.27        343.26       292.43 o
  11  16  11       1271.02        560.48       294.96 o
  12  16  11         19.81         30.98       307.17 o
   1  17  11        298.49        388.52       303.44 o
   2  17  11         12.07        639.94       308.37 o
   3  17  11          4.39        155.15       293.99 o
   4  17  11         46.50        325.51       325.43 o
   5  17  11        501.05        782.98       308.54 o
   6  17  11         96.41        271.71       253.19 o
   7  17  11        194.27        349.37       355.96 o
   8  17  11        314.20        197.35       305.09 o
   9  17  11        144.55        224.90       446.62 o
  10  17  11         39.93          0.12       273.17 o
  11  17  11         17.18        -72.14       245.64 o
   0  18  11       1637.70       1584.52       471.69 o
   1  18  11       1120.12        811.81       311.31 o
   2  18  11        339.98        545.72       304.93 o
   3  18  11       2228.69       2195.17       313.38 o
   4  18  11       4761.61       4937.58       333.82 o
   5  18  11        586.06        405.10       293.88 o
   6  18  11         20.11         -5.37       332.84 o
   7  18  11       2270.62       1807.58       338.11 o
   8  18  11        243.83        291.56       312.15 o
   9  18  11       1313.69       1359.27       466.39 o
  10  18  11        169.38        327.17       244.11 o
   1  19  11         16.26        154.17       290.09 o
   2  19  11        278.39        509.48       299.31 o
   3  19  11        115.58         86.02       293.45 o
   4  19  11        163.83        426.78       349.96 o
   5  19  11        320.72        164.57       304.18 o
   6  19  11         96.73        267.64       301.89 o
   7  19  11         77.55         32.67       311.97 o
   8  19  11        752.05        509.46       485.10 o
   9  19  11        108.28        265.54       314.31 o
   0  20  11       1126.79        720.94       451.91 o
   1  20  11         62.31         74.01       298.88 o
   2  20  11       1688.49       1423.02       439.03 o
   3  20  11        119.88        265.01       314.57 o
   4  20  11         32.54        -95.42       345.29 o
   5  20  11       1222.13       1075.06       650.69 o
   6  20  11        696.39        736.03       324.95 o
   7  20  11        226.17        533.47       646.80 o
   8  20  11         92.47        108.04       668.34 o
   1  21  11         51.69        228.98       346.88 o
   2  21  11        528.90        435.30       299.29 o
   3  21  11        437.32        760.68       316.94 o
   4  21  11        158.61         89.79       290.57 o
   5  21  11        346.76        449.61       317.08 o
   6  21  11         15.08        112.98       469.57 o
   0  22  11       3018.80       2237.68       474.16 o
   1  22  11          1.27       -307.22       307.22 o
   2  22  11        520.92        243.43       292.84 o
   3  22  11        573.32        641.51       449.09 o
   4  22  11       1327.32       1325.96       326.13 o
   0   0  12        585.46        130.28       552.18 o
   1   0  12         55.76        435.06       315.41 o
   2   0  12       5684.83       4903.57       416.08 o
   3   0  12      34516.56      31242.94      3651.32 o
   4   0  12       3482.99       3831.77       412.83 o
   5   0  12       1030.90       1042.19       373.40 o
   6   0  12       3445.99       2815.87       366.12 o
   7   0  12      32326.55      32579.33      1023.34 o
   8   0  12       3598.19       3371.61       399.31 o
   9   0  12      10913.81      11417.52       394.86 o
  10   0  12        257.43        195.74       285.77 o
  11   0  12       8122.74       8360.87       698.00 o
  12   0  12        780.33        522.37       358.35 o
  13   0  12       2758.34       2466.74       457.13 o
  14   0  12        308.31        452.08       226.64 o
  15   0  12       1660.71       1593.09       251.18 o
  16   0  12          2.65        335.86       347.07 o
   1   1  12        127.34        244.17       273.82 o
   2   1  12      44797.68      41204.80      4134.80 o
   3   1  12        459.64        600.13       279.81 o
   4   1  12       1163.81       1096.01       271.44 o
   5   1  12        390.47        255.54       259.13 o
   6   1  12        287.65        369.97       240.38 o
   7   1  12       4891.26       4788.47       236.70 o
   8   1  12       9300.84       9453.74       244.42 o
   9   1  12       1361.07       1730.61       222.52 o
  10   1  12        104.94        -65.64       201.24 o
  11   1  12         10.37        215.54       204.52 o
  12   1  12         30.93        -35.77       186.47 o
  13   1  12        115.78        220.51       164.18 o
  14   1  12         23.03        -27.34       164.81 o
  15   1  12          1.97        -35.57       167.50 o
  16   1  12         19.00         -0.91       228.82 o
   0   2  12      11662.25      11081.73       441.75 o
   1   2  12        668.85        679.82       271.32 o
   2   2  12       1849.28       1832.33       285.35 o
   3   2  12       1729.90       1979.71       279.20 o
   4   2  12      21520.83      22367.67       346.67 o
   5   2  12      18091.44      16784.15      1182.17 o
   6   2  12        745.56        767.11       239.86 o
   7   2  12      11957.33      12298.19       262.33 o
   8   2  12        894.29       1382.32       233.96 o
   9   2  12      15498.17      13285.89      1241.17 o
  10   2  12       5795.68       5930.52       304.95 o
  11   2  12       1536.20       1541.93       215.76 o
  12   2  12        474.47        302.38       204.19 o
  13   2  12      11068.34      11587.85       324.28 o
  14   2  12        702.64        765.35       162.60 o
  15   2  12       2517.96       2597.50       201.26 o
  16   2  12         34.64        -13.85       211.63 o
   1   3  12      12671.06      11935.36       293.75 o
   2   3  12       2089.36       2073.36       304.95 o
   3   3  12       8427.62       8826.08       312.86 o
   4   3  12         30.41        203.47       275.06 o
   5   3  12        221.23        450.97       249.32 o
   6   3  12        374.88        358.97       238.69 o
   7   3  12          8.50        193.61       238.54 o
   8   3  12       1144.54       1619.73       235.87 o
   9   3  12        281.27        187.88       217.26 o
  10   3  12        395.51        553.17       217.99 o
  11   3  12         74.72         67.20       207.04 o
  12   3  12        361.39        540.15       184.85 o
  13   3  12         68.82         42.22       171.92 o
  14   3  12         14.68        259.99       164.12 o
  15   3  12         24.61         87.85       204.94 o
  16   3  12         31.49        -66.74       217.73 o
   0   4  12       1609.46       2536.17       463.27 o
   1   4  12       6561.04       6491.13       298.88 o
   2   4  12      18460.13      18462.70       313.38 o
   3   4  12        853.77        754.41       282.40 o
   4   4  12      12449.81      13187.05       336.39 o
   5   4  12      13113.29      12757.60       293.21 o
   6   4  12          3.51        166.66       216.09 o
   7   4  12      21376.78      21547.55       292.08 o
   8   4  12       1806.33       1930.54       229.17 o
   9   4  12       7632.99       7572.13       356.56 o
  10   4  12        979.97       1036.43       222.03 o
  11   4  12        236.06        482.75       200.12 o
  12   4  12          0.07        -56.95       193.93 o
  13   4  12       7598.93       7874.04       386.73 o
  14   4  12        154.59         80.78       167.08 o
  15   4  12       5076.64       5352.01       390.98 o
  16   4  12        563.03         48.42       199.10 o
   1   5  12      31201.26      30729.97       390.38 o
   2   5  12       8447.76       8687.28       322.42 o
   3   5  12       7951.28       6849.73       539.70 o
   4   5  12       8057.17       8714.89       324.63 o
   5   5  12       2594.35       2106.07       238.78 o
   6   5  12       6321.99       6883.01       269.52 o
   7   5  12        102.45         85.05       222.64 o
   8   5  12       5699.33       5933.82       319.48 o
   9   5  12       4403.69       4466.25       332.41 o
  10   5  12        626.16        766.35       217.92 o
  11   5  12        139.29        344.22       180.82 o
  12   5  12        754.81        746.39       186.76 o
  13   5  12       1186.50       1135.63       187.22 o
  14   5  12         28.08         41.92       188.54 o
  15   5  12        178.59        149.69       191.83 o
  16   5  12         90.30         62.11       193.04 o
   0   6  12       8711.55       9479.45       438.36 o
   1   6  12        188.02         55.61       291.84 o
   2   6  12       6937.59       7423.66       298.61 o
   3   6  12       3138.74       3227.95       237.28 o
   4   6  12        289.68        221.54       228.68 o
   5   6  12       2960.52       2916.20       233.39 o
   6   6  12        392.09        413.42       215.59 o
   7   6  12       3257.89       3363.62       228.29 o
   8   6  12          5.30        122.12       251.27 o
   9   6  12       9840.06      10556.81       499.40 o
  10   6  12       4509.52       4655.94       222.64 o
  11   6  12        749.66        583.13       175.75 o
  12   6  12          8.57        220.87       171.11 o
  13   6  12       6755.66       6557.55       218.58 o
  14   6  12         24.57        191.25       173.62 o
  15   6  12       4923.20       3892.92       348.43 o
  16   6  12         27.88         34.28       189.63 o
   1   7  12      10857.27      10356.60       313.21 o
   2   7  12       1052.86        911.34       263.50 o
   3   7  12       8098.57       7648.34       274.74 o
   4   7  12        418.73        655.96       234.30 o
   5   7  12      27986.87      25621.13      2661.70 o
   6   7  12       3487.49       3841.62       258.26 o
   7   7  12       3300.93       3201.20       234.79 o
   8   7  12          7.90         19.18       215.23 o
   9   7  12         47.36        144.16       215.57 o
  10   7  12       1147.80       1202.96       205.77 o
  11   7  12         52.27        126.59       205.08 o
  12   7  12        781.82        669.98       234.49 o
  13   7  12         28.13         97.16       228.49 o
  14   7  12          4.48        136.18       262.79 o
  15   7  12         16.55         -4.90       235.32 o
   0   8  12       4986.34       5009.23       414.94 o
   1   8  12        130.59        208.43       253.57 o
   2   8  12       8419.35       8773.85       282.48 o
   3   8  12       7678.14       7877.63       257.71 o
   4   8  12        278.75        179.48       197.62 o
   5   8  12      10807.85      11438.87       263.53 o
   6   8  12         56.08        341.64       224.03 o
   7   8  12        441.53        663.43       239.05 o
   8   8  12        138.87        142.31       218.11 o
   9   8  12       3429.47       3294.38       253.93 o
  10   8  12        429.50        437.61       236.42 o
  11   8  12       1577.97       1898.87       300.22 o
  12   8  12         32.07       -293.02       293.02 o
  13   8  12       2900.98       2746.10       249.93 o
  14   8  12        427.15          0.08       291.49 o
  15   8  12        361.03        473.91       286.32 o
   1   9  12      17126.70      17087.66       766.53 o
   2   9  12       8370.09       8664.08       254.86 o
   3   9  12       4353.42       4037.88       232.52 o
   4   9  12       3549.07       3885.92       237.22 o
   5   9  12       9483.79       9592.19       894.34 o
   6   9  12        458.61        688.60       209.28 o
   7   9  12       1501.53       1414.73       233.88 o
   8   9  12       1524.18       1562.62       249.22 o
   9   9  12          7.33        335.58       242.90 o
  10   9  12         68.09        -14.41       243.61 o
  11   9  12          6.09         93.40       228.31 o
  12   9  12        337.06        275.78       300.96 o
  13   9  12        506.16        -41.17       254.96 o
  14   9  12        242.16        280.55       241.82 o
  15   9  12        145.21        160.22       242.85 o
   0  10  12       1164.92       1624.93       307.24 o
   1  10  12          2.87        153.69       210.11 o
   2  10  12       1365.60       1301.98       217.14 o
   3  10  12        203.32        -34.87       206.73 o
   4  10  12         46.56        205.36       244.18 o
   5  10  12       3143.59       3688.95       249.51 o
   6  10  12         46.80        265.35       210.92 o
   7  10  12         20.09        281.64       240.59 o
   8  10  12        397.85        297.90       229.92 o
   9  10  12        227.44        364.60       238.55 o
  10  10  12        179.57        -72.53       238.49 o
  11  10  12       3500.81       3499.16       467.80 o
  12  10  12        667.97        801.98       304.43 o
  13  10  12       1288.13        740.90       248.40 o
  14  10  12        104.70         79.82       242.72 o
   1  11  12      25506.46      24766.59       363.37 o
   2  11  12        143.11        314.26       212.66 o
   3  11  12       4100.31       3912.65       234.79 o
   4  11  12       1139.15       1160.48       222.31 o
   5  11  12       2712.03       2765.16       222.80 o
   6  11  12       1647.31       1916.94       250.78 o
   7  11  12       9964.09       9978.54       556.04 o
   8  11  12        259.15        493.39       253.17 o
   9  11  12       1577.10       1670.50       347.06 o
  10  11  12        118.72        368.10       542.65 o
  11  11  12        366.34        361.13       292.04 o
  12  11  12        616.97        651.39       597.37 o
  13  11  12         25.53       -244.07       244.07 o
  14  11  12       1005.73        462.99       346.35 o
   0  12  12       1575.18       1755.87       287.65 o
   1  12  12        351.03        475.91       206.44 o
   2  12  12        493.69        387.77       210.64 o
   3  12  12       2609.41       2769.18       223.93 o
   4  12  12         82.84         30.54       210.75 o
   5  12  12        295.49        537.90       223.53 o
   6  12  12        273.74        316.68       245.97 o
   7  12  12       2790.17       3254.51       269.85 o
   8  12  12        157.84         34.28       331.24 o
   9  12  12         67.78        388.46       287.69 o
  10  12  12       1839.93       1947.15       295.48 o
  11  12  12        387.10        626.97       402.13 o
  12  12  12          3.76        350.23       291.07 o
  13  12  12         13.67        276.12       299.37 o
  14  12  12        276.31         23.10       254.79 o
   1  13  12       2935.03       2886.75       227.04 o
   2  13  12        284.34        192.64       200.27 o
   3  13  12       4143.93       4131.48       457.69 o
   4  13  12        542.87        379.65       246.73 o
   5  13  12       6303.16       6446.73       282.14 o
   6  13  12         74.15        -56.02       469.21 o
   7  13  12       9041.84       8485.52      1221.76 o
   8  13  12          7.60        273.16       321.71 o
   9  13  12       5757.34       6319.27       706.82 o
  10  13  12          2.39       -282.36       282.36 o
  11  13  12        435.84        195.59       437.79 o
  12  13  12          6.59        -54.59       243.58 o
  13  13  12        634.02        823.32       310.19 o
   0  14  12       3860.45       4384.98       481.92 o
   1  14  12        581.81        663.95       303.75 o
   2  14  12        666.60        516.24       311.36 o
   3  14  12       1315.66       1388.22       303.68 o
   4  14  12       1639.90       1701.34       359.66 o
   5  14  12       3984.91       4656.65       469.14 o
   6  14  12         86.83        -97.55       308.92 o
   7  14  12        375.62        -10.26       307.36 o
   8  14  12       1554.29       1494.12       297.32 o
   9  14  12        783.95        810.12       293.45 o
  10  14  12        241.62        249.65       295.83 o
  11  14  12        388.39        451.43       287.92 o
  12  14  12        151.70        216.34       352.64 o
  13  14  12         79.45        125.65       257.40 o
   1  15  12        569.58        415.23       302.04 o
   2  15  12       2846.74       3220.93       316.29 o
   3  15  12       5231.46       5311.19       337.00 o
   4  15  12         24.19        -72.71       304.49 o
   5  15  12        993.05        825.85       313.76 o
   6  15  12        927.13        872.71       310.80 o
   7  15  12       1034.98       1313.20       309.80 o
   8  15  12       1855.90       2183.34       671.87 o
   9  15  12       1626.25       1029.87       472.74 o
  10  15  12        187.62        261.52       330.26 o
  11  15  12         14.86        -47.47       290.10 o
  12  15  12        175.01        409.04       312.02 o
   0  16  12       3769.54       4471.12       636.21 o
   1  16  12       1183.58       1547.07       316.25 o
   2  16  12        284.38        131.79       285.10 o
   3  16  12       3312.30       2945.16       331.66 o
   4  16  12        231.96        469.86       349.94 o
   5  16  12        390.03        -42.38       313.28 o
   6  16  12        134.88         91.36       279.65 o
   7  16  12       1107.88       1023.78       318.23 o
   8  16  12         39.93        180.92       307.76 o
   9  16  12        330.45        698.35       701.88 o
  10  16  12        121.08         59.31       434.26 o
  11  16  12         21.02         76.97       267.63 o
   1  17  12       5707.75       6022.96       340.37 o
   2  17  12       2239.30       2024.00       660.92 o
   3  17  12       4665.32       5055.96       350.23 o
   4  17  12        553.96        549.91       340.46 o
   5  17  12       2878.43       2940.75       351.79 o
   6  17  12        301.29        312.68       247.80 o
   7  17  12        444.10        469.14       311.06 o
   8  17  12        366.62        105.23       302.66 o
   9  17  12        723.83        538.51       303.96 o
  10  17  12          1.37         -5.65       463.56 o
  11  17  12        213.23        173.82       248.41 o
   0  18  12        126.89        337.17       427.91 o
   1  18  12       1109.05       1469.55       300.92 o
   2  18  12        742.46        982.25       356.39 o
   3  18  12        181.53        442.62       302.23 o
   4  18  12        239.82       1478.43      1304.20 o
   5  18  12        100.29        700.89       305.74 o
   6  18  12        306.54        367.70       256.11 o
   7  18  12       1473.94       1294.27       629.15 o
   8  18  12          0.27        296.52       299.63 o
   9  18  12         29.66        -17.65       640.09 o
  10  18  12          4.52       -136.78       306.28 o
   1  19  12       3835.42       3416.40       323.83 o
   2  19  12          0.30       -217.99       329.76 o
   3  19  12       3739.42       3730.55       384.86 o
   4  19  12          2.57         36.17       370.71 o
   5  19  12       1375.79        909.42       310.98 o
   6  19  12        114.25       -231.86       279.45 o
   7  19  12        282.46        637.20       316.64 o
   8  19  12        620.44        573.76       308.47 o
   9  19  12        364.84        326.58       470.63 o
   0  20  12       1199.49        762.25       401.07 o
   1  20  12        611.98        553.67       292.69 o
   2  20  12        462.12        114.45       298.69 o
   3  20  12        562.98        412.12       299.05 o
   4  20  12         15.75         48.05       298.68 o
   5  20  12         17.41         76.26       439.20 o
   6  20  12          6.93         23.04       318.10 o
   7  20  12         32.24         93.14       408.31 o
   1  21  12       1253.39       1298.63       315.31 o
   2  21  12        107.97        418.79       299.93 o
   3  21  12       2129.57       1857.21       542.47 o
   4  21  12         60.41        369.63       302.52 o
   5  21  12       2394.60       1978.81       349.26 o
   6  21  12         15.14        101.68       659.87 o
   0  22  12         82.89        250.67       432.14 o
   1  22  12          0.07        491.33       305.95 o
   2  22  12         17.76        113.43       302.93 o
   3  22  12          1.23        155.70       442.73 o
   4  22  12          3.54        142.86       311.42 o
   1   1  13      19624.26      19044.22       426.76 o
   2   1  13         71.61        -35.90       262.50 o
   3   1  13       3708.06       3237.95       292.13 o
   4   1  13       1743.67       1509.48       276.62 o
   5   1  13       5851.50       5047.55       279.50 o
   6   1  13       4539.68       4648.11       249.64 o
   7   1  13       2934.85       2996.96       230.98 o
   8   1  13       9183.99       9188.86       243.06 o
   9   1  13       3877.92       3879.56       225.52 o
  10   1  13       9013.39       9406.91       243.92 o
  11   1  13       1456.57       1622.58       212.23 o
  12   1  13       5947.52       6334.74       354.32 o
  13   1  13       1371.61       1360.47       179.20 o
  14   1  13       2603.41       2428.42       187.87 o
  15   1  13        188.41        333.13       177.17 o
  16   1  13        913.83        649.96       198.42 o
   0   2  13        125.46        393.10       327.47 o
   1   2  13       4225.53       3552.23       395.85 o
   2   2  13       3733.37       3722.29       299.99 o
   3   2  13       3834.93       3566.79       302.68 o
   4   2  13       2006.57       1876.57       271.87 o
   5   2  13       2942.97       3312.05       284.29 o
   6   2  13        429.40        584.45       228.98 o
   7   2  13        178.16        485.98       232.14 o
   8   2  13       3465.48       3551.89       255.21 o
   9   2  13       6698.38       7086.13       302.65 o
  10   2  13        168.05        234.82       210.41 o
  11   2  13       1639.40       1654.20       231.21 o
  12   2  13        550.42        602.62       223.54 o
  13   2  13          8.20        141.30       182.13 o
  14   2  13         28.58         93.19       166.40 o
  15   2  13         47.25        274.44       176.36 o
  16   2  13         10.44         46.59       203.65 o
   1   3  13      13898.68      13500.29       314.29 o
   2   3  13      42824.70      40991.06      2269.08 o
   3   3  13      25362.15      24757.93       482.84 o
   4   3  13       1272.53       1305.21       283.88 o
   5   3  13        313.95        286.50       225.98 o
   6   3  13        621.14        378.72       226.26 o
   7   3  13       9600.58       9840.12       268.42 o
   8   3  13       4484.05       4145.42       233.21 o
   9   3  13       2172.15       2269.87       303.67 o
  10   3  13        101.31        146.39       230.67 o
  11   3  13          0.97       -107.41       257.32 o
  12   3  13        727.08        751.32       189.52 o
  13   3  13         77.05         65.77       200.29 o
  14   3  13       1396.64       1485.52       172.98 o
  15   3  13        564.84        573.03       173.94 o
  16   3  13        727.54        536.05       195.48 o
   0   4  13       9188.30       7722.60      1951.00 o
   1   4  13      12629.97      12802.15       348.79 o
   2   4  13       1899.12       1938.20       305.85 o
   3   4  13      15717.84      16502.89       345.97 o
   4   4  13       3494.28       2951.30       537.80 o
   5   4  13          1.38        170.77       231.93 o
   6   4  13         17.01        258.26       199.61 o
   7   4  13       6435.19       6266.69       221.10 o
   8   4  13          9.70        -34.08       217.89 o
   9   4  13       2614.51       2875.75       235.07 o
  10   4  13       1128.99       1152.62       222.62 o
  11   4  13        425.56        442.97       208.60 o
  12   4  13       5250.25       5228.18       285.14 o
  13   4  13          2.34         -5.22       180.08 o
  14   4  13         26.03        100.59       173.98 o
  15   4  13          5.07         53.74       199.64 o
  16   4  13        523.36        286.29       194.27 o
   1   5  13      26554.20      26301.77      2331.90 o
   2   5  13       6546.54       6998.00       270.95 o
   3   5  13        558.98       1198.72       279.62 o
   4   5  13      23277.74      22808.84       599.21 o
   5   5  13       5592.98       5497.02       242.85 o
   6   5  13        128.66         98.31       220.20 o
   7   5  13        556.23        806.59       239.61 o
   8   5  13       9200.67       9351.35       246.98 o
   9   5  13       2962.61       2797.22       222.91 o
  10   5  13        408.20        545.07       213.39 o
  11   5  13        932.62       1262.71       206.91 o
  12   5  13       5549.95       5499.31       210.40 o
  13   5  13         55.64         39.18       183.30 o
  14   5  13       2885.13       2656.26       190.47 o
  15   5  13         10.93        -88.33       193.39 o
  16   5  13       1465.19        872.03       210.21 o
   0   6  13      24611.92      26213.54      1200.22 o
   1   6  13      14646.77      15427.58       317.66 o
   2   6  13      22968.91      24075.13       367.42 o
   3   6  13       1726.19       1890.86       270.69 o
   4   6  13       4599.33       4479.99       415.38 o
   5   6  13       1794.07       1672.25       219.42 o
   6   6  13       1285.72       1344.71       217.69 o
   7   6  13       3455.62       3588.35       243.25 o
   8   6  13       2487.25       2565.87       231.95 o
   9   6  13       2334.36       2726.44       235.68 o
  10   6  13       3120.06       3420.30       240.17 o
  11   6  13       1920.39       2015.34       200.57 o
  12   6  13        904.76        813.86       178.21 o
  13   6  13        362.55        405.59       191.55 o
  14   6  13        304.19        291.46       175.63 o
  15   6  13        368.08        158.77       178.97 o
   1   7  13      59997.15      60208.36       441.81 o
   2   7  13         53.33         68.62       258.89 o
   3   7  13       3805.54       3558.98       233.09 o
   4   7  13        101.90         40.11       221.70 o
   5   7  13       1272.93       1085.88       223.44 o
   6   7  13       1668.13       1350.31       218.48 o
   7   7  13       4332.56       4442.94       234.09 o
   8   7  13       5947.64       6057.04       774.34 o
   9   7  13        104.49        206.52       221.36 o
  10   7  13        289.23        174.77       191.71 o
  11   7  13       1958.09       2040.96       208.14 o
  12   7  13       2233.78       1976.10       509.80 o
  13   7  13         29.18        176.47       214.83 o
  14   7  13       2315.20       2596.98       270.51 o
  15   7  13          2.79        183.86       267.50 o
   0   8  13       2048.66       1597.81       433.73 o
   1   8  13       3968.49       4113.36       279.51 o
   2   8  13       7850.62       7756.66       256.46 o
   3   8  13        532.67        520.74       233.35 o
   4   8  13       3431.37       3267.03       289.09 o
   5   8  13        540.22        834.75       219.35 o
   6   8  13        123.09        303.60       214.53 o
   7   8  13        554.65        547.06       230.85 o
   8   8  13         96.64         95.11       218.61 o
   9   8  13         65.28        225.43       223.17 o
  10   8  13        149.60        375.72       229.13 o
  11   8  13        442.78        518.08       287.72 o
  12   8  13        461.70        365.51       237.28 o
  13   8  13        464.36        195.91       403.02 o
  14   8  13        343.22        112.49       240.70 o
  15   8  13        419.64        410.90       271.65 o
   1   9  13        442.56        523.72       218.12 o
   2   9  13       1200.35       1245.87       219.96 o
   3   9  13       8348.35       8660.74       256.86 o
   4   9  13       6705.67       6672.91       237.95 o
   5   9  13       1840.22       1775.22       269.12 o
   6   9  13       2701.60       2657.38       245.39 o
   7   9  13         28.58        147.29       236.42 o
   8   9  13      10967.43      11124.14       290.25 o
   9   9  13        714.33        736.56       237.81 o
  10   9  13        608.47        655.79       235.05 o
  11   9  13         16.71        294.99       232.07 o
  12   9  13         27.97        167.17       290.80 o
  13   9  13        539.37        593.84       402.49 o
  14   9  13        457.86        347.95       241.00 o
  15   9  13        389.52        171.17       282.83 o
   0  10  13       2016.68       1476.02       679.46 o
   1  10  13        424.57        520.00       209.00 o
   2  10  13      21040.93      21595.97       534.06 o
   3  10  13         39.50       -170.46       244.78 o
   4  10  13      12885.79      12789.86       568.25 o
   5  10  13       3779.03       3950.41       239.02 o
   6  10  13      11480.52      11790.72       406.71 o
   7  10  13        614.72        458.88       212.73 o
   8  10  13       1878.01       1727.08       241.14 o
   9  10  13       2327.77       2677.14       250.56 o
  10  10  13         27.87         45.52       412.18 o
  11  10  13        272.64        119.48       335.13 o
  12  10  13          1.73         17.59       294.17 o
  13  10  13       1342.76       1701.13       363.31 o
  14  10  13         30.68        260.07       292.63 o
   1  11  13       2630.03       2767.57       243.62 o
   2  11  13        874.95        860.12       232.43 o
   3  11  13       1639.17       1463.96       218.87 o
   4  11  13        270.77        168.00       217.83 o
   5  11  13          9.48        -75.11       245.30 o
   6  11  13       1603.00       1599.16       220.13 o
   7  11  13       5247.06       5280.45       260.21 o
   8  11  13         75.57       -158.27       236.17 o
   9  11  13         10.86        546.73       238.12 o
  10  11  13        307.45        128.46       416.08 o
  11  11  13        300.45        286.84       295.43 o
  12  11  13         46.78         51.07       333.14 o
  13  11  13         15.11        -19.28       232.10 o
  14  11  13        171.77        143.11       254.07 o
   0  12  13       3575.74       3927.92       395.42 o
   1  12  13        381.06        441.62       208.94 o
   2  12  13        506.33        386.44       215.22 o
   3  12  13        707.91        711.14       229.38 o
   4  12  13       4388.16       4306.71       864.78 o
   5  12  13        260.06        366.54       196.46 o
   6  12  13       4294.00       4093.83       330.09 o
   7  12  13       6226.72       6102.51       511.43 o
   8  12  13       1256.21       1134.00       244.40 o
   9  12  13       1017.11       1187.51       341.58 o
  10  12  13         16.09        142.97       283.77 o
  11  12  13        445.42        566.30       396.48 o
  12  12  13        266.44       -166.37       295.15 o
  13  12  13       1029.76        820.36       315.08 o
   1  13  13        177.87        346.60       207.25 o
   2  13  13       2461.27       2357.35       229.39 o
   3  13  13        828.47        727.62       213.18 o
   4  13  13       5461.20       5378.00       310.37 o
   5  13  13        913.97        910.11       231.71 o
   6  13  13        487.55        348.76       245.12 o
   7  13  13        591.27       1080.63       256.10 o
   8  13  13          4.66        236.99       296.95 o
   9  13  13         13.51        182.07       287.90 o
  10  13  13        954.73       1326.58       504.17 o
  11  13  13         34.75       -274.57       293.58 o
  12  13  13         99.45       -115.45       436.73 o
  13  13  13         10.12        242.29       250.28 o
   0  14  13        970.15        784.63       307.85 o
   1  14  13       2485.42       2708.73       216.26 o
   2  14  13        118.75        378.05       238.42 o
   3  14  13       1161.88       1454.95       275.82 o
   4  14  13         37.55       -125.12       244.47 o
   5  14  13       2048.46       2333.31       329.55 o
   6  14  13        882.27       1204.08       323.63 o
   7  14  13        527.86        508.12       313.31 o
   8  14  13        210.47        -30.83       289.79 o
   9  14  13       1332.69        593.14       629.50 o
  10  14  13         36.83        -93.36       296.43 o
  11  14  13       1225.45       1265.78       302.44 o
  12  14  13          1.59        -85.79       450.15 o
   1  15  13        282.50        447.57       372.48 o
   2  15  13       3420.45       3543.89       337.70 o
   3  15  13        244.55        347.18       297.04 o
   4  15  13         71.71         73.01       295.97 o
   5  15  13         67.11         93.32       303.26 o
   6  15  13        367.51        522.62       306.35 o
   7  15  13        131.79        220.98       297.94 o
   8  15  13        757.40        656.46       290.32 o
   9  15  13        372.99        648.39       290.55 o
  10  15  13         76.09         53.66       438.14 o
  11  15  13         43.41       -127.52       339.01 o
  12  15  13        140.07          4.90       308.59 o
   0  16  13       1624.88       2294.88       416.96 o
   1  16  13        141.48        165.06       317.66 o
   2  16  13       5606.72       6033.46       354.91 o
   3  16  13       2322.87       2669.46       309.69 o
   4  16  13       3519.14       3074.89       483.16 o
   5  16  13       3256.68       3137.45       328.61 o
   6  16  13       5126.44       5257.81       362.06 o
   7  16  13        850.18        523.57       311.52 o
   8  16  13       2310.77       1793.46       315.40 o
   9  16  13        540.72         85.59       550.95 o
  10  16  13         58.27        379.18       602.32 o
  11  16  13        401.99        288.54       312.56 o
   1  17  13       1005.78        785.44       345.23 o
   2  17  13         34.80         82.33       297.13 o
   3  17  13         16.70         38.23       282.75 o
   4  17  13        147.53        431.25       328.97 o
   5  17  13          0.08        185.05       290.33 o
   6  17  13        224.68        -51.11       267.19 o
   7  17  13        127.20       -145.61       299.02 o
   8  17  13       1829.97       1886.14       488.28 o
   9  17  13        815.00        886.78       300.77 o
  10  17  13          8.61         -1.77       469.92 o
   0  18  13         21.45         24.36       439.56 o
   1  18  13        270.95        182.23       298.21 o
   2  18  13       2111.42       2527.08       307.57 o
   3  18  13        562.98        897.86       450.50 o
   4  18  13       5458.24       5115.37       346.08 o
   5  18  13        502.98        354.17       297.34 o
   6  18  13       2380.30       1573.70       290.55 o
   7  18  13         42.23        -60.12       305.92 o
   8  18  13       1984.46       1737.47       329.20 o
   9  18  13        675.70        302.87       309.61 o
   1  19  13        124.51        347.25       354.65 o
   2  19  13         40.24       -190.19       286.43 o
   3  19  13          3.25        172.31       303.07 o
   4  19  13        151.21        303.02       300.42 o
   5  19  13          0.33        114.99       283.79 o
   6  19  13        601.83        358.99       253.08 o
   7  19  13        125.74        230.49       306.75 o
   8  19  13          0.52        428.25       306.65 o
   0  20  13         16.04        267.26       414.49 o
   1  20  13        149.99       -250.90       294.98 o
   2  20  13       2844.28       2862.87       326.18 o
   3  20  13         74.28        248.84       304.93 o
   4  20  13       1066.80       1071.20       369.16 o
   5  20  13        210.79        139.46       650.33 o
   6  20  13        511.62        497.97       284.83 o
   7  20  13        162.66        618.22       471.69 o
   1  21  13         46.46        298.16       298.46 o
   2  21  13        115.83         96.00       295.29 o
   3  21  13         26.25         82.87       291.51 o
   4  21  13          9.80        232.73       355.72 o
   5  21  13         51.78        201.58       305.93 o
   6  21  13        634.13        605.71       351.29 o
   0  22  13       1811.28       1784.35       460.74 o
   1  22  13         31.43         27.64       305.60 o
   2  22  13        947.12        879.16       374.24 o
   3  22  13          0.75       -144.05       477.33 o
   0   0  14      13142.24      11837.32       659.51 o
   1   0  14        681.47        714.03       432.92 o
   2   0  14        653.11        392.14       425.84 o
   3   0  14        929.98       1231.34       396.01 o
   4   0  14      20308.75      16514.67      3319.63 o
   5   0  14      19895.56      19403.00       444.67 o
   6   0  14      37020.11      38962.37       517.24 o
   7   0  14        121.14         68.83       294.49 o
   8   0  14      10172.06      10185.08       775.14 o
   9   0  14       3817.35       4233.50       526.06 o
  10   0  14       2245.22       2059.17       300.71 o
  11   0  14        642.15        511.21       310.44 o
  12   0  14       2849.35       2956.84       365.79 o
  13   0  14       1020.02        484.74       398.78 o
  14   0  14        212.37         79.62       229.34 o
  15   0  14        181.11        158.35       235.39 o
  16   0  14        440.93        374.82       248.15 o
   1   1  14          1.63       -237.84       265.20 o
   2   1  14      22423.56      21469.00       705.43 o
   3   1  14         87.71        226.21       251.96 o
   4   1  14        310.11        532.18       254.93 o
   5   1  14       8487.86       8160.60       276.21 o
   6   1  14         46.03       -102.19       223.89 o
   7   1  14        145.00        212.55       218.26 o
   8   1  14       2530.72       2840.40       223.79 o
   9   1  14       1226.80       1671.85       217.59 o
  10   1  14         35.36         73.32       298.47 o
  11   1  14       1835.99       1454.49       221.09 o
  12   1  14          2.59         24.98       217.91 o
  13   1  14        175.22         83.42       182.68 o
  14   1  14         65.34        340.90       168.41 o
  15   1  14          8.24         47.50       170.12 o
  16   1  14        219.83         62.20       174.34 o
   0   2  14       3103.17       2564.98       350.50 o
   1   2  14         50.24          4.53       288.07 o
   2   2  14      35912.23      34403.46       391.23 o
   3   2  14      11106.09      11763.23       322.41 o
   4   2  14       4266.12       3791.39       246.29 o
   5   2  14      19834.66      19074.12       311.92 o
   6   2  14       8388.15       8256.42       256.09 o
   7   2  14        164.28        311.20       211.30 o
   8   2  14        625.15        651.15       233.46 o
   9   2  14        292.15        189.31       212.60 o
  10   2  14         57.11       -208.01       208.01 o
  11   2  14        885.36       1194.03       235.26 o
  12   2  14          0.16         62.70       239.00 o
  13   2  14        665.03        761.85       183.80 o
  14   2  14        281.56        221.73       175.77 o
  15   2  14          6.45        -67.79       162.45 o
  16   2  14         28.01        160.70       195.12 o
   1   3  14       1170.58       1042.38       261.62 o
   2   3  14         36.22         69.33       302.24 o
   3   3  14        771.72        800.10       298.56 o
   4   3  14       5235.78       4980.35       277.20 o
   5   3  14       3115.38       3629.62       233.65 o
   6   3  14       1559.37       1533.18       229.79 o
   7   3  14       1968.45       2235.82       239.05 o
   8   3  14        337.20        593.82       213.14 o
   9   3  14        135.14         86.64       220.14 o
  10   3  14        389.15        150.48       218.31 o
  11   3  14        594.11        635.60       210.15 o
  12   3  14         46.21        -26.59       201.89 o
  13   3  14        419.39        488.60       186.60 o
  14   3  14         61.13        193.20       167.47 o
  15   3  14         78.29        -91.29       184.06 o
  16   3  14        130.48        343.77       200.44 o
   0   4  14      42226.80      41065.97       638.77 o
   1   4  14       1713.97       1708.22       287.50 o
   2   4  14      20344.70      21326.75       453.51 o
   3   4  14        625.95        740.48       277.95 o
   4   4  14        245.99        198.66       238.69 o
   5   4  14        262.52        442.45       220.52 o
   6   4  14       8461.14       8296.62       427.72 o
   7   4  14       3607.36       3582.60       221.92 o
   8   4  14       2718.09       2855.10       250.01 o
   9   4  14       2538.83       2419.31       242.86 o
  10   4  14        241.74        177.46       216.00 o
  11   4  14        139.67        487.32       216.67 o
  12   4  14        153.73        302.32       184.17 o
  13   4  14         87.45        332.90       205.75 o
  14   4  14         15.90        166.65       168.04 o
  15   4  14        665.81        379.78       182.48 o
  16   4  14        338.46         40.85       194.16 o
   1   5  14       2506.14       2859.45       293.40 o
   2   5  14        849.16        936.83       233.20 o
   3   5  14       4717.61       4519.05       281.68 o
   4   5  14       4645.22       4648.71       246.69 o
   5   5  14       4142.71       4392.61       235.83 o
   6   5  14        111.52        372.38       220.16 o
   7   5  14         10.34       -109.88       226.72 o
   8   5  14       5270.71       5589.14       244.10 o
   9   5  14          1.17        260.65       203.69 o
  10   5  14        557.72        500.80       198.05 o
  11   5  14       3001.22       3034.65       225.69 o
  12   5  14        723.15        612.14       196.38 o
  13   5  14        100.31        118.39       185.13 o
  14   5  14        386.32        445.96       175.89 o
  15   5  14        495.25        547.49       188.55 o
   0   6  14       1970.30       2701.08       368.88 o
   1   6  14      12621.91      11920.78       902.40 o
   2   6  14      50364.64      51240.54       678.53 o
   3   6  14        907.36        882.94       238.64 o
   4   6  14      12739.92      12329.17       288.04 o
   5   6  14         29.92         88.65       213.50 o
   6   6  14        161.56        480.64       227.38 o
   7   6  14         48.22        124.76       214.13 o
   8   6  14       3471.20       3577.49       233.10 o
   9   6  14       1626.40       1570.88       214.48 o
  10   6  14       1081.94        969.49       367.21 o
  11   6  14         71.13         35.38       202.12 o
  12   6  14        504.21        395.26       200.14 o
  13   6  14        191.95        179.73       186.43 o
  14   6  14        141.68        383.32       172.78 o
  15   6  14        641.88        239.56       191.22 o
   1   7  14        910.09        627.57       254.14 o
   2   7  14      16862.81      17042.18       298.35 o
   3   7  14       3810.24       4486.09       228.03 o
   4   7  14       1470.11       1364.77       226.34 o
   5   7  14         56.69         -8.98       216.57 o
   6   7  14       1581.47       1709.65       222.05 o
   7   7  14         18.02        -65.93       207.62 o
   8   7  14       3666.47       4242.14       232.97 o
   9   7  14        624.46        813.73       216.71 o
  10   7  14         14.43         45.81       208.97 o
  11   7  14         82.57        136.00       184.14 o
  12   7  14       2066.95       1898.99       210.19 o
  13   7  14          0.49         61.20       190.45 o
  14   7  14        646.79        807.17       247.57 o
  15   7  14       1252.06        838.90       249.43 o
   0   8  14       2782.38       2061.63       370.36 o
   1   8  14       7650.02       8172.60       271.04 o
   2   8  14      40926.80      40949.39       486.77 o
   3   8  14         58.54        -82.77       219.27 o
   4   8  14       3236.48       3354.05       232.36 o
   5   8  14       3603.04       3653.43       230.72 o
   6   8  14       3654.55       4018.25       261.37 o
   7   8  14        244.37        445.09       232.07 o
   8   8  14       1179.49       1278.70       275.08 o
   9   8  14        412.75        187.36       228.72 o
  10   8  14         23.97        179.92       180.83 o
  11   8  14        658.76        477.27       230.49 o
  12   8  14        634.56        489.64       237.38 o
  13   8  14        630.13        536.80       246.61 o
  14   8  14          4.26       -232.21       259.40 o
  15   8  14          5.60        172.34       237.80 o
   1   9  14        515.55        364.27       215.06 o
   2   9  14      17287.92      16684.14       650.79 o
   3   9  14       4352.62       4550.45       237.48 o
   4   9  14        720.10        770.95       201.51 o
   5   9  14       3312.85       3285.95       233.03 o
   6   9  14        343.42        223.12       224.44 o
   7   9  14         87.33        365.58       236.92 o
   8   9  14       2750.51       2626.61       442.27 o
   9   9  14         15.20        244.05       220.73 o
  10   9  14        602.51        761.57       291.49 o
  11   9  14         87.02        180.88       255.54 o
  12   9  14       1387.83       1638.44       242.19 o
  13   9  14        259.03        382.01       420.84 o
  14   9  14        512.30        741.74       248.80 o
   0  10  14      17799.38      17831.42       401.34 o
   1  10  14        273.40        487.50       212.79 o
   2  10  14      15217.33      14882.87       278.00 o
   3  10  14        264.76        464.35       215.43 o
   4  10  14       6414.89       6875.57       255.49 o
   5  10  14        839.60       1158.53       231.45 o
   6  10  14       2183.66       2059.73       223.04 o
   7  10  14        518.04        884.25       218.18 o
   8  10  14        345.92        271.43       206.18 o
   9  10  14        316.57        406.28       236.89 o
  10  10  14        144.54        298.82       223.46 o
  11  10  14        294.82        -30.52       230.02 o
  12  10  14          0.30        -10.94       398.60 o
  13  10  14        765.28        717.85       623.50 o
  14  10  14        302.42        194.36       309.54 o
   1  11  14         62.69        156.03       211.73 o
   2  11  14        195.15        210.45       211.21 o
   3  11  14       1577.87       1741.06       225.11 o
   4  11  14        621.56        675.69       236.25 o
   5  11  14        122.27        366.53       217.51 o
   6  11  14       1850.81       1792.38       236.30 o
   7  11  14          0.47        352.95       212.04 o
   8  11  14       1603.65       1812.30       243.28 o
   9  11  14        496.59        391.12       232.00 o
  10  11  14       4807.60       4644.64       312.04 o
  11  11  14          2.19        -91.19       287.86 o
  12  11  14       3096.28       2587.70       318.82 o
  13  11  14        129.37        268.68       425.08 o
  14  11  14        407.83        501.42       277.14 o
   0  12  14       1251.68       1199.99       286.74 o
   1  12  14       1420.64       1656.70       216.73 o
   2  12  14       1614.84       1389.26       234.72 o
   3  12  14       1397.31       1144.93       216.03 o
   4  12  14        921.48       1042.67       236.51 o
   5  12  14       2581.12       2724.45       208.63 o
   6  12  14         20.32        -29.19       216.15 o
   7  12  14        122.61        390.12       242.86 o
   8  12  14       2864.09       2458.15       248.75 o
   9  12  14        937.46        886.93       230.09 o
  10  12  14       1265.78       1071.02       293.28 o
  11  12  14         27.67        149.70       387.30 o
  12  12  14          1.59        144.48       300.55 o
  13  12  14        117.82        -87.64       311.73 o
   1  13  14        228.63        181.39       201.19 o
   2  13  14       1426.93       1586.02       216.88 o
   3  13  14       4980.72       4592.86       629.76 o
   4  13  14       1525.55       1516.10       235.43 o
   5  13  14          4.42         72.90       216.19 o
   6  13  14        931.27        774.72       253.93 o
   7  13  14       5514.62       5482.13       263.14 o
   8  13  14       1559.83       1376.37       236.27 o
   9  13  14       1497.91       1796.28       295.58 o
  10  13  14       3387.02       3292.84       324.75 o
  11  13  14         54.03        507.71       285.34 o
  12  13  14       1328.05        790.85       462.15 o
  13  13  14         91.18        408.43       272.23 o
   0  14  14       1407.74       1316.29       302.74 o
   1  14  14       1102.77       1091.60       203.50 o
   2  14  14       4940.73       4910.43       253.29 o
   3  14  14       1477.27       1678.84       214.53 o
   4  14  14        763.13        547.08       245.97 o
   5  14  14       2360.90       2249.30       268.34 o
   6  14  14        164.76        158.99       275.33 o
   7  14  14        311.07       -297.38       297.38 o
   8  14  14          1.16        152.86       278.92 o
   9  14  14       1024.10        465.68       451.56 o
  10  14  14          5.83        165.51       287.83 o
  11  14  14        652.20        620.17       302.38 o
  12  14  14          3.65        225.13       298.42 o
   1  15  14         82.93        459.77       244.90 o
   2  15  14       8266.92       7983.63       288.20 o
   3  15  14       1328.16       1376.23       308.89 o
   4  15  14        955.94        905.12       323.22 o
   5  15  14        108.69        502.24       302.29 o
   6  15  14       1069.08       1336.98       307.50 o
   7  15  14        145.87        -35.96       292.35 o
   8  15  14       3548.07       3918.64       446.62 o
   9  15  14         37.13        396.03       296.63 o
  10  15  14       4840.53       3800.31       499.22 o
  11  15  14        333.10        722.71       318.46 o
  12  15  14       2154.13       2649.91       643.45 o
   0  16  14          5.80       -178.29       452.62 o
   1  16  14       1969.08       2008.20       329.04 o
   2  16  14       3422.29       3919.68       328.35 o
   3  16  14       3116.38       3422.71       387.66 o
   4  16  14        195.31        273.10       289.60 o
   5  16  14       1059.69       1266.18       313.42 o
   6  16  14        245.64        143.39       589.25 o
   7  16  14        872.81        881.89       309.75 o
   8  16  14        586.26        736.03       285.97 o
   9  16  14        620.19        741.04       428.08 o
  10  16  14        368.96        344.23       458.98 o
  11  16  14          0.06        122.86       467.10 o
   1  17  14       3123.96       3213.95       323.47 o
   2  17  14        309.29        455.42       311.39 o
   3  17  14         20.93        406.41       491.81 o
   4  17  14        511.74        494.32       300.71 o
   5  17  14         69.08        244.60       295.19 o
   6  17  14       1277.16       1477.02       316.44 o
   7  17  14        413.81        226.49       306.32 o
   8  17  14       2136.38       1314.52       310.62 o
   9  17  14          4.26       -101.14       297.15 o
  10  17  14       2536.17       1841.20       494.99 o
   0  18  14         43.25        137.34       432.14 o
   1  18  14        597.14        471.50       305.89 o
   2  18  14        138.70        130.38       289.19 o
   3  18  14         25.29         30.67       299.34 o
   4  18  14         32.65        137.75       343.07 o
   5  18  14         40.21       -292.36       583.96 o
   6  18  14        653.77        584.15       256.55 o
   7  18  14        273.11        212.31       312.31 o
   8  18  14          4.43          6.53       354.23 o
   9  18  14        194.04        178.16       296.53 o
   1  19  14        234.46         94.59       290.11 o
   2  19  14        249.79        242.99       317.22 o
   3  19  14         13.80         62.78       306.52 o
   4  19  14        910.01       1256.13       312.69 o
   5  19  14        209.65       -142.97       308.57 o
   6  19  14       1595.76       1263.12       384.60 o
   7  19  14        612.96        710.57       342.64 o
   8  19  14        599.68        759.11       325.51 o
   0  20  14         76.18       -170.88       447.68 o
   1  20  14          0.58         31.73       305.89 o
   2  20  14         76.00        215.53       310.42 o
   3  20  14        276.41        272.67       314.82 o
   4  20  14        456.93        664.47       311.64 o
   5  20  14         75.05        329.52       336.99 o
   6  20  14         66.54        166.22       258.46 o
   7  20  14          7.73        170.42       360.58 o
   1  21  14          3.87       -233.42       439.73 o
   2  21  14        586.90        323.61       315.46 o
   3  21  14         27.21        328.06       316.11 o
   4  21  14       1738.63       1782.51       334.13 o
   5  21  14         95.18        -66.02       462.15 o
   0  22  14        177.59         49.78       432.50 o
   1  22  14         29.24       -165.08       304.51 o
   2  22  14        197.07         -9.31       322.79 o
   1   1  15      34927.06      33583.45       358.24 o
   2   1  15       2511.53       2124.26       287.21 o
   3   1  15       2286.61       2027.65       256.87 o
   4   1  15         45.07         64.79       235.92 o
   5   1  15        311.63        384.83       247.27 o
   6   1  15      11146.84      10654.56       634.91 o
   7   1  15       2685.11       2720.11       223.54 o
   8   1  15       8802.24       8490.45       247.46 o
   9   1  15       4022.94       4248.88       226.33 o
  10   1  15       1606.19       1439.63       211.84 o
  11   1  15       1062.10       1336.23       212.23 o
  12   1  15       2459.04       2549.77       206.29 o
  13   1  15        480.35        862.75       220.37 o
  14   1  15       2087.44       1885.68       183.72 o
  15   1  15         64.80        202.08       164.22 o
  16   1  15       1401.94        672.43       212.99 o
   0   2  15       5246.17       4735.21       450.87 o
   1   2  15       4266.53       4468.96       300.32 o
   2   2  15       1272.10       1203.33       298.87 o
   3   2  15       1773.34       2186.91       269.26 o
   4   2  15        203.56        585.73       223.41 o
   5   2  15         65.34        -28.52       226.34 o
   6   2  15        152.18        199.46       219.21 o
   7   2  15         54.24        231.53       212.49 o
   8   2  15        203.34        300.38       218.25 o
   9   2  15         74.06        399.90       294.75 o
  10   2  15        209.64         96.49       215.11 o
  11   2  15        477.78        462.27       204.43 o
  12   2  15        485.59        655.01       226.64 o
  13   2  15         98.50         74.88       206.06 o
  14   2  15        217.98         96.09       175.22 o
  15   2  15          0.24        -33.22       167.59 o
  16   2  15         13.76         71.82       176.91 o
   1   3  15      22123.40      21732.37       347.05 o
   2   3  15       7977.35       7705.06       684.03 o
   3   3  15      13830.82      14231.60       324.73 o
   4   3  15        211.15        837.08       238.11 o
   5   3  15         21.77        192.89       199.03 o
   6   3  15       6679.45       7107.36       227.53 o
   7   3  15       2529.02       2756.23       233.22 o
   8   3  15       7958.40       8023.88       327.19 o
   9   3  15        954.92       1135.11       217.27 o
  10   3  15        263.79        127.61       209.00 o
  11   3  15        155.74        240.37       212.86 o
  12   3  15       2100.54       2242.26       206.48 o
  13   3  15          0.08        -63.05       207.81 o
  14   3  15        379.49        153.88       185.14 o
  15   3  15         61.69        149.30       165.93 o
   0   4  15       5982.68       6328.98       471.74 o
   1   4  15      12655.39      13533.66       293.96 o
   2   4  15       4855.35       5049.81       279.88 o
   3   4  15       1084.05        851.85       250.08 o
   4   4  15      12563.14      12188.91       279.33 o
   5   4  15      10059.09      10210.62       282.72 o
   6   4  15       2688.60       2836.64       228.34 o
   7   4  15        844.03        983.64       221.01 o
   8   4  15        886.55       1190.06       201.48 o
   9   4  15         53.58        123.05       220.42 o
  10   4  15        927.28       1190.14       229.03 o
  11   4  15        218.61        361.72       216.70 o
  12   4  15       1409.60       1462.84       225.90 o
  13   4  15         34.82        156.59       180.52 o
  14   4  15          5.70        277.43       193.25 o
  15   4  15          4.52         55.44       178.42 o
   1   5  15      11616.47      11592.35       686.21 o
   2   5  15       1452.11       1475.49       235.17 o
   3   5  15       5508.29       5172.31       259.38 o
   4   5  15         16.84       -127.75       278.14 o
   5   5  15       1866.82       2064.11       226.03 o
   6   5  15       2835.34       3250.50       224.20 o
   7   5  15       9622.84       9676.10       257.18 o
   8   5  15       6750.52       6952.19       254.95 o
   9   5  15         35.19         93.68       199.74 o
  10   5  15        255.46        598.91       193.68 o
  11   5  15       1047.76        872.05       198.08 o
  12   5  15       2205.53       2385.45       178.66 o
  13   5  15        107.82        -47.16       181.29 o
  14   5  15         21.51         58.50       184.40 o
  15   5  15         59.70        225.66       174.30 o
   0   6  15      13364.88      15392.28       604.26 o
   1   6  15          0.25        -91.69       276.74 o
   2   6  15        957.59        958.58       242.76 o
   3   6  15        730.33        464.91       230.88 o
   4   6  15       4524.47       4599.79       236.54 o
   5   6  15         40.81         62.69       233.26 o
   6   6  15        106.96        118.41       210.79 o
   7   6  15        278.98        244.06       214.78 o
   8   6  15       1019.54        934.00       215.45 o
   9   6  15        444.05        580.13       216.88 o
  10   6  15        334.09        340.31       229.53 o
  11   6  15        435.25        397.47       215.48 o
  12   6  15         99.63          9.74       186.53 o
  13   6  15          3.88         18.60       184.32 o
  14   6  15        121.78        275.40       207.11 o
  15   6  15        142.81         72.21       194.50 o
   1   7  15       1197.08       1505.68       253.49 o
   2   7  15       1373.85       1551.88       228.25 o
   3   7  15       2166.05       2026.96       212.27 o
   4   7  15       1706.39       1496.96       239.05 o
   5   7  15        656.18        646.75       216.66 o
   6   7  15        649.23        820.29       229.32 o
   7   7  15        656.41        911.43       244.00 o
   8   7  15       2608.00       2809.08       232.24 o
   9   7  15       1650.36       1720.06       368.54 o
  10   7  15         22.77        199.53       211.20 o
  11   7  15         43.47       -119.35       224.75 o
  12   7  15       2819.42       2684.35       338.68 o
  13   7  15        462.17        151.90       197.39 o
  14   7  15        261.42        399.96       206.93 o
  15   7  15          2.47        -33.58       273.40 o
   0   8  15         64.38        105.45       444.50 o
   1   8  15      21734.09      21988.06       334.14 o
   2   8  15       6403.08       6638.16       238.92 o
   3   8  15       7219.11       7376.01       229.16 o
   4   8  15        479.94        338.08       221.82 o
   5   8  15       8962.54       8985.71       248.14 o
   6   8  15       1979.25       2268.74       236.71 o
   7   8  15       1657.61       1958.68       226.90 o
   8   8  15        706.82        688.23       210.64 o
   9   8  15      13738.36      14208.35       535.40 o
  10   8  15        273.31        141.63       211.73 o
  11   8  15       4069.38       3648.54       226.45 o
  12   8  15         45.47         78.58       286.25 o
  13   8  15        950.93        688.41       384.39 o
  14   8  15        105.76        -24.09       297.55 o
  15   8  15        142.37        142.19       245.09 o
   1   9  15       5030.38       4999.89       267.69 o
   2   9  15       2149.25       2160.44       236.54 o
   3   9  15      22451.89      22861.21       315.41 o
   4   9  15      12697.09      12846.37       296.08 o
   5   9  15       2850.41       2997.59       243.71 o
   6   9  15       6267.74       6318.54       240.92 o
   7   9  15       4733.02       5019.88       242.32 o
   8   9  15         87.66         57.99       233.60 o
   9   9  15       5136.62       5315.36       248.04 o
  10   9  15       1199.33       1575.68       293.96 o
  11   9  15          0.92        395.43       236.00 o
  12   9  15       2144.65       1980.80       253.18 o
  13   9  15         92.49         -5.49       295.70 o
  14   9  15        984.39        718.27       297.81 o
   0  10  15       1251.96       1009.56       347.23 o
   1  10  15        749.28        794.55       231.56 o
   2  10  15       7284.57       6941.30       252.47 o
   3  10  15       1224.39       1236.35       221.44 o
   4  10  15       3913.35       3703.51       210.59 o
   5  10  15       1698.25       2034.98       240.70 o
   6  10  15        812.62        689.55       229.51 o
   7  10  15       1830.61       1822.29       216.59 o
   8  10  15        908.78       1185.94       212.79 o
   9  10  15       1725.27       1693.63       238.54 o
  10  10  15        150.69        254.35       229.09 o
  11  10  15          7.52        -77.17       232.48 o
  12  10  15        168.66         17.70       276.86 o
  13  10  15        407.26        301.00       337.20 o
  14  10  15        586.22        356.33       247.35 o
   1  11  15        814.60        726.17       206.43 o
   2  11  15        647.62        620.88       213.64 o
   3  11  15       2298.04       2044.65       233.25 o
   4  11  15       3577.13       3716.40       231.90 o
   5  11  15        244.20        134.15       227.95 o
   6  11  15         22.52        349.38       246.08 o
   7  11  15        248.96        215.17       209.22 o
   8  11  15       1932.26       1753.93       235.36 o
   9  11  15       1055.69       1022.52       253.23 o
  10  11  15       2416.22       2648.16       299.30 o
  11  11  15       1136.60       1008.76       236.23 o
  12  11  15        790.25        431.09       512.11 o
  13  11  15        385.61        311.40       414.84 o
   0  12  15       1250.07       1984.72       360.17 o
   1  12  15       2222.40       1982.11       215.57 o
   2  12  15        400.58        465.52       230.53 o
   3  12  15          5.94        129.71       212.01 o
   4  12  15        834.33        835.35       213.48 o
   5  12  15        282.43        765.67       248.94 o
   6  12  15       1998.82       2174.89       323.51 o
   7  12  15       3339.35       3544.38       339.80 o
   8  12  15        121.44        482.57       259.69 o
   9  12  15       1108.60       1265.63       231.76 o
  10  12  15       1461.07       1532.75       243.97 o
  11  12  15        752.03        454.35       401.07 o
  12  12  15         69.67        332.93       432.14 o
  13  12  15       1084.29        902.36       307.38 o
   1  13  15       2893.95       2951.82       216.34 o
   2  13  15         27.49        175.13       207.89 o
   3  13  15       3538.27       3686.05       279.67 o
   4  13  15        249.27        307.48       210.64 o
   5  13  15       1372.16       1348.26       208.56 o
   6  13  15       2062.03       2020.17       305.98 o
   7  13  15         25.13        328.66       228.90 o
   8  13  15       1245.30       1094.01       239.05 o
   9  13  15        811.27       1003.65       233.04 o
  10  13  15        529.69        828.86       319.92 o
  11  13  15        152.81        553.25       426.85 o
  12  13  15       1005.07       1181.68       468.86 o
  13  13  15        140.69        269.38       643.27 o
   0  14  15       7002.41       7498.74       348.59 o
   1  14  15       2517.07       2254.59       223.76 o
   2  14  15       5498.01       5693.24       231.69 o
   3  14  15       2206.62       1995.59       217.48 o
   4  14  15       3564.65       3580.63       261.76 o
   5  14  15        166.92        302.68       219.26 o
   6  14  15         65.92        103.47       331.04 o
   7  14  15       2033.22       1556.10       246.57 o
   8  14  15         60.70        -71.38       370.36 o
   9  14  15         44.21        128.16       410.61 o
  10  14  15       1543.31        844.16       447.68 o
  11  14  15        771.75        569.01       301.25 o
  12  14  15         21.57         81.24       356.33 o
   1  15  15       7959.14       8623.96       364.97 o
   2  15  15       5402.76       5390.68       271.48 o
   3  15  15         10.03        144.94       241.97 o
   4  15  15         95.83        203.46       243.09 o
   5  15  15          4.26         29.04       312.79 o
   6  15  15        660.36        615.85       312.58 o
   7  15  15        541.63        663.27       295.11 o
   8  15  15        188.70         48.19       298.03 o
   9  15  15         15.75       -261.49       325.81 o
  10  15  15        225.38       -132.75       443.79 o
  11  15  15          0.05        260.56       412.37 o
   0  16  15       3713.28       3572.24       470.27 o
   1  16  15       1545.81       1603.39       312.52 o
   2  16  15       4093.06       4161.58       420.67 o
   3  16  15         23.69        290.35       538.94 o
   4  16  15       1908.99       1790.03       314.35 o
   5  16  15       1837.73       1208.38       425.43 o
   6  16  15        598.83        567.80       302.88 o
   7  16  15        676.99        639.11       371.95 o
   8  16  15        898.19        812.79       345.38 o
   9  16  15        417.11        147.55       297.21 o
  10  16  15        567.44        661.25       292.69 o
  11  16  15        162.91        132.40       468.86 o
   1  17  15        110.72         81.34       309.07 o
   2  17  15          4.42        -60.11       299.94 o
   3  17  15          0.20       -252.18       300.88 o
   4  17  15         72.11       -221.21       298.24 o
   5  17  15         39.17        231.54       341.17 o
   6  17  15         43.70       -192.42       333.99 o
   7  17  15        332.16        248.85       312.50 o
   8  17  15        104.48       -134.53       307.61 o
   9  17  15        179.00        372.66       341.17 o
  10  17  15         36.28         64.89       306.18 o
   0  18  15       2903.04       3293.32       489.69 o
   1  18  15        183.32        177.08       352.54 o
   2  18  15       5559.24       5794.58       334.78 o
   3  18  15       1277.32       1268.45       316.93 o
   4  18  15       1059.60        917.53       417.84 o
   5  18  15        100.04         -8.59       287.00 o
   6  18  15        850.21        997.15       325.10 o
   7  18  15       1276.59       1109.61       422.43 o
   8  18  15        104.87        122.13       308.46 o
   9  18  15        536.05        430.32       311.37 o
   1  19  15        345.21        215.33       287.95 o
   2  19  15        226.61        497.67       310.03 o
   3  19  15        225.37        328.01       292.61 o
   4  19  15          1.34         58.66       343.75 o
   5  19  15         19.79        423.59       323.40 o
   6  19  15       1193.13       1126.44       259.42 o
   7  19  15        172.42       -138.82       315.10 o
   8  19  15         11.25        667.34       313.73 o
   0  20  15        569.57       1267.83       427.20 o
   1  20  15         15.16         52.65       294.93 o
   2  20  15       2241.86       2686.98       325.26 o
   3  20  15         29.16         73.16       304.50 o
   4  20  15        836.51        851.89       318.30 o
   5  20  15         76.33        463.84       303.20 o
   6  20  15        110.68        301.02       263.25 o
   1  21  15        324.29        406.39       307.18 o
   2  21  15         90.16        140.11       292.87 o
   3  21  15         21.33        275.01       325.96 o
   4  21  15        185.70         -1.68       314.82 o
   5  21  15          2.96        101.33       463.92 o
   0  22  15        662.44        965.97       483.34 o
   1  22  15          2.04       -105.08       353.01 o
   0   0  16      16712.92      16359.64       653.16 o
   1   0  16        106.97        -76.58       397.40 o
   2   0  16       1175.39       1292.13       322.15 o
   3   0  16       5463.22       5105.43       376.73 o
   4   0  16        412.66        610.58       476.28 o
   5   0  16      31324.74      31867.90       918.83 o
   6   0  16       9112.05      10024.21       367.53 o
   7   0  16       5998.37       6102.38       610.79 o
   8   0  16       4181.31       4012.27       334.55 o
   9   0  16      10059.73      10486.39       349.48 o
  10   0  16       4459.81       4643.53       310.73 o
  11   0  16       1337.64       1933.08       300.02 o
  12   0  16       1721.04       1511.25       312.06 o
  13   0  16       6229.69       6330.23       329.65 o
  14   0  16          2.12        130.24       239.71 o
  15   0  16       2155.88       2287.32       261.51 o
   1   1  16         21.76        -59.56       272.18 o
   2   1  16        129.86        171.57       266.18 o
   3   1  16        755.87        842.38       227.54 o
   4   1  16       5396.88       5861.86       245.72 o
   5   1  16       1342.48       1602.85       325.02 o
   6   1  16       6335.74       7140.67       372.72 o
   7   1  16         82.65         40.39       219.15 o
   8   1  16          2.19       -220.56       220.56 o
   9   1  16         85.78         99.85       213.29 o
  10   1  16       1346.15       1272.96       215.68 o
  11   1  16        262.08        612.72       204.84 o
  12   1  16       1854.39       1918.34       215.74 o
  13   1  16          1.49        -72.00       202.40 o
  14   1  16        142.95        337.06       204.31 o
  15   1  16          3.72       -124.30       176.32 o
   0   2  16       2055.05       2616.04       352.71 o
   1   2  16       1710.97       1982.56       278.68 o
   2   2  16       3009.69       3019.83       276.63 o
   3   2  16       1227.50       1005.12       271.55 o
   4   2  16       2713.56       3019.26       225.81 o
   5   2  16       2952.42       2715.78       234.14 o
   6   2  16          6.99       -131.05       229.60 o
   7   2  16      13542.55      14280.27       315.08 o
   8   2  16       2082.88       2051.23       261.26 o
   9   2  16       5758.63       6280.56       241.23 o
  10   2  16          9.25         40.88       232.02 o
  11   2  16      10825.30      10819.50       251.38 o
  12   2  16        692.41        781.96       224.20 o
  13   2  16       6609.14       7285.04       587.66 o
  14   2  16        218.17         61.42       184.57 o
  15   2  16       1770.41       1699.85       185.39 o
   1   3  16         45.11        -82.77       266.38 o
   2   3  16      10097.57      10870.09       308.87 o
   3   3  16       6042.87       5277.67       491.76 o
   4   3  16       4273.66       4288.36       252.09 o
   5   3  16       2689.98       2480.32       270.00 o
   6   3  16        527.27        772.36       209.21 o
   7   3  16        101.88        180.10       215.47 o
   8   3  16       2173.41       2536.73       223.46 o
   9   3  16       1594.68       1938.01       221.82 o
  10   3  16          6.70        122.77       212.07 o
  11   3  16         32.26        251.99       214.30 o
  12   3  16        503.89        734.25       219.06 o
  13   3  16         16.01        369.86       201.87 o
  14   3  16         10.82        -60.70       195.03 o
  15   3  16         46.19         66.84       182.21 o
   0   4  16       5906.23       5305.60       568.07 o
   1   4  16        961.91        962.98       232.29 o
   2   4  16        613.26        744.21       245.01 o
   3   4  16        867.01        908.33       231.64 o
   4   4  16       3907.20       3896.70       238.48 o
   5   4  16       4811.76       4562.80       234.88 o
   6   4  16       3185.57       3341.87       233.20 o
   7   4  16       2312.36       2274.84       209.19 o
   8   4  16       2758.87       3065.09       209.27 o
   9   4  16      10059.73      10499.55       316.61 o
  10   4  16       2274.64       2192.91       218.31 o
  11   4  16       4186.66       3792.18       521.83 o
  12   4  16       1644.77       1707.66       212.31 o
  13   4  16       3945.80       3956.62       217.45 o
  14   4  16        292.68         46.54       198.84 o
  15   4  16         41.24        151.32       168.79 o
   1   5  16       4056.27       3728.52       287.09 o
   2   5  16        603.50        735.33       250.07 o
   3   5  16       7487.46       7671.99       255.81 o
   4   5  16        312.75         58.76       221.63 o
   5   5  16        177.55        235.35       220.35 o
   6   5  16       1762.26       2006.38       240.33 o
   7   5  16        544.17        516.29       210.82 o
   8   5  16         45.40       -193.01       217.80 o
   9   5  16        420.71        253.72       212.05 o
  10   5  16        395.65        404.21       213.32 o
  11   5  16        212.17        270.88       189.91 o
  12   5  16        322.62        165.01       200.58 o
  13   5  16        122.40        264.70       180.28 o
  14   5  16        902.39        746.28       177.85 o
  15   5  16        167.41        113.62       179.14 o
   0   6  16       8958.14      10656.53       688.99 o
   1   6  16        163.84        310.91       252.29 o
   2   6  16        931.70       1141.27       212.13 o
   3   6  16       1436.05       1399.62       244.28 o
   4   6  16        191.16        430.84       233.32 o
   5   6  16       8372.32       8233.28       284.91 o
   6   6  16        204.40        176.99       224.56 o
   7   6  16       5199.39       5081.71       243.89 o
   8   6  16         63.94        337.16       222.67 o
   9   6  16       2086.03       1943.85       232.48 o
  10   6  16       3474.19       3452.16       240.41 o
  11   6  16       4118.62       3864.14       228.80 o
  12   6  16        238.24        221.11       196.04 o
  13   6  16       2553.89       2623.90       212.55 o
  14   6  16        283.71        339.00       201.67 o
  15   6  16         52.05        172.43       189.64 o
   1   7  16        353.47        442.24       222.64 o
   2   7  16       1368.36       1302.04       237.91 o
   3   7  16      15343.07      14236.53      1469.62 o
   4   7  16       1740.51       2212.31       228.83 o
   5   7  16       8060.90       8200.57       358.75 o
   6   7  16        303.71        321.96       225.86 o
   7   7  16       3367.56       3393.50       227.28 o
   8   7  16         71.94       -135.27       210.69 o
   9   7  16       1134.96       1159.01       232.18 o
  10   7  16        153.72        325.43       207.19 o
  11   7  16        891.05        654.99       225.92 o
  12   7  16        260.69        274.01       192.74 o
  13   7  16        129.79        159.07       194.06 o
  14   7  16         63.31        121.67       200.14 o
  15   7  16        445.41        591.08       301.89 o
   0   8  16       5102.34       5121.53       329.20 o
   1   8  16       6440.70       6521.11       241.34 o
   2   8  16       1863.42       1836.54       217.11 o
   3   8  16       1149.96       1193.89       202.05 o
   4   8  16        776.59       1192.22       245.53 o
   5   8  16       1575.14       1607.46       234.32 o
   6   8  16       1835.55       2263.46       220.15 o
   7   8  16       1897.84       2037.50       223.46 o
   8   8  16       3355.70       3490.28       228.12 o
   9   8  16       5618.25       6015.23       238.54 o
  10   8  16        182.57        232.96       203.57 o
  11   8  16        878.77        808.74       198.37 o
  12   8  16         43.73         43.08       215.19 o
  13   8  16       1940.74       2088.89       316.02 o
  14   8  16         27.00        -15.80       261.42 o
   1   9  16      19920.70      21038.12       318.45 o
   2   9  16        623.08        670.59       222.54 o
   3   9  16      12217.13      12111.47       272.21 o
   4   9  16       5114.04       5588.54       242.93 o
   5   9  16       4596.60       4331.24       346.47 o
   6   9  16       2111.46       2207.71       221.07 o
   7   9  16       1788.00       2096.14       216.64 o
   8   9  16       1147.40       1522.94       217.39 o
   9   9  16        223.71        120.30       214.01 o
  10   9  16        250.87        380.59       256.67 o
  11   9  16        217.89        325.95       289.47 o
  12   9  16        111.31        168.75       234.44 o
  13   9  16          1.21        222.60       234.95 o
  14   9  16         56.33        292.28       332.33 o
   0  10  16          1.43        295.04       337.83 o
   1  10  16          3.50         17.03       212.64 o
   2  10  16       6066.74       5775.78       271.23 o
   3  10  16         45.24        151.67       226.86 o
   4  10  16       1027.53        893.97       194.90 o
   5  10  16        205.37       -120.59       203.30 o
   6  10  16        257.93        166.87       212.73 o
   7  10  16       4206.79       4183.88       228.74 o
   8  10  16       1349.87       1297.65       375.92 o
   9  10  16       1268.27       1501.45       223.39 o
  10  10  16        358.64        323.15       230.39 o
  11  10  16        734.74        864.96       257.39 o
  12  10  16        226.69        -55.38       230.28 o
  13  10  16        740.76       1015.75       442.03 o
  14  10  16         30.24          6.46       308.66 o
   1  11  16       3415.27       3468.60       228.24 o
   2  11  16       2087.36       1753.73       225.53 o
   3  11  16      13490.74      12913.64       613.14 o
   4  11  16       2419.24       2591.75       202.64 o
   5  11  16       1409.76       1612.41       225.82 o
   6  11  16         36.02         66.73       210.79 o
   7  11  16        471.82        455.10       297.86 o
   8  11  16        262.92        414.95       205.08 o
   9  11  16        180.85        -15.56       225.71 o
  10  11  16        758.59        789.62       334.35 o
  11  11  16        301.42        170.12       283.76 o
  12  11  16        122.04         31.67       292.22 o
  13  11  16        110.66        219.23       297.21 o
   0  12  16       2949.65       3333.93       313.90 o
   1  12  16         25.11         -6.15       209.09 o
   2  12  16       3289.10       3221.60       238.09 o
   3  12  16       3076.36       2874.04       244.97 o
   4  12  16       2127.62       2173.61       223.55 o
   5  12  16       2393.65       2341.53       255.77 o
   6  12  16         58.16        417.63       214.46 o
   7  12  16       5300.62       5574.35       234.49 o
   8  12  16         76.42        430.04       228.81 o
   9  12  16       1114.38       1134.01       234.64 o
  10  12  16        163.34        199.62       228.38 o
  11  12  16         11.98       -192.60       290.66 o
  12  12  16        159.09        -32.83       422.96 o
  13  12  16          6.60        223.15       301.92 o
   1  13  16        865.24        881.43       216.15 o
   2  13  16        276.52         86.35       205.89 o
   3  13  16      13447.08      13535.01       268.93 o
   4  13  16       1029.64        925.35       233.69 o
   5  13  16      13721.91      13403.26       350.94 o
   6  13  16       5339.30       5307.42       323.24 o
   7  13  16        278.08        333.53       241.93 o
   8  13  16         48.83        191.82       279.67 o
   9  13  16        118.91         -2.04       272.43 o
  10  13  16          6.93         -1.37       395.78 o
  11  13  16          3.84        410.52       286.48 o
  12  13  16        468.34        218.64       312.45 o
   0  14  16       2136.57       2250.08       361.64 o
   1  14  16       5172.22       5077.88       241.97 o
   2  14  16        730.00        864.45       205.86 o
   3  14  16       1142.23       1206.17       228.12 o
   4  14  16       3599.92       3169.45       221.04 o
   5  14  16         16.46          3.09       200.85 o
   6  14  16         36.42        438.29       243.09 o
   7  14  16         20.25         -1.74       261.60 o
   8  14  16       3300.14       2815.33       287.09 o
   9  14  16         56.69        -94.51       279.70 o
  10  14  16        533.02        -10.24       418.37 o
  11  14  16         59.02         11.30       430.38 o
  12  14  16         92.89        301.12       302.14 o
   1  15  16        821.67        751.52       206.19 o
   2  15  16         68.58        171.06       197.18 o
   3  15  16       6247.19       6509.32       340.97 o
   4  15  16       2856.15       3069.82       267.49 o
   5  15  16       6694.32       6732.01       343.98 o
   6  15  16         30.19        112.13       239.15 o
   7  15  16        111.89        312.81       383.77 o
   8  15  16        392.00        525.25       294.08 o
   9  15  16         71.66        460.87       287.18 o
  10  15  16        169.38        139.84       289.92 o
  11  15  16          2.32       -173.00       428.26 o
   0  16  16       7549.06       7354.19       472.74 o
   1  16  16        226.93        274.89       237.08 o
   2  16  16         51.62        -13.41       226.94 o
   3  16  16         40.31        194.45       261.26 o
   4  16  16        284.01        725.79       305.66 o
   5  16  16         13.44        -50.72       305.76 o
   6  16  16         57.99        223.34       365.94 o
   7  16  16          3.90       -305.28       305.28 o
   8  16  16        284.93        334.99       348.47 o
   9  16  16          7.27       -177.04       302.73 o
  10  16  16         22.86        106.44       348.87 o
   1  17  16       8209.83       9004.92       367.23 o
   2  17  16       1077.08        840.81       306.79 o
   3  17  16       3267.38       3138.91       319.37 o
   4  17  16        578.47        794.44       361.90 o
   5  17  16       2657.18       2332.12       315.93 o
   6  17  16        100.68       -303.97       303.97 o
   7  17  16        881.72       1388.91       307.66 o
   8  17  16          5.91       -241.64       318.27 o
   9  17  16        355.61        527.84       355.69 o
   0  18  16        200.06       -226.31       434.26 o
   1  18  16         76.84         33.72       295.37 o
   2  18  16         25.90        136.86       412.20 o
   3  18  16         30.95        173.95       290.69 o
   4  18  16        162.26        339.72       326.05 o
   5  18  16        370.89        -15.25       312.81 o
   6  18  16         10.24        254.74       306.90 o
   7  18  16        141.21        279.87       317.90 o
   8  18  16         15.74        459.72       319.50 o
   9  18  16         29.71       -212.96       387.83 o
   1  19  16        592.27        557.46       624.21 o
   2  19  16        158.93        174.34       309.05 o
   3  19  16       2837.39       2847.56       329.13 o
   4  19  16        553.65        328.43       308.62 o
   5  19  16       1001.64        836.74       364.78 o
   6  19  16        874.39        940.20       309.40 o
   7  19  16        200.37        498.60       344.05 o
   0  20  16          6.35        576.19       415.20 o
   1  20  16        140.90        369.52       391.19 o
   2  20  16          0.04       -307.73       307.92 o
   3  20  16        153.77          3.39       333.72 o
   4  20  16         37.89        235.73       343.55 o
   5  20  16        108.49        143.57       302.69 o
   6  20  16        282.10        547.87       490.04 o
   1  21  16        125.33        505.61       352.34 o
   2  21  16          1.11        301.85       519.52 o
   3  21  16        783.35        439.10       313.75 o
   4  21  16        111.34       -135.19       308.33 o
   1   1  17      34128.81      33152.63      1253.45 o
   2   1  17       1439.50       1482.35       250.31 o
   3   1  17      23734.18      24636.65       494.50 o
   4   1  17         90.55        207.74       217.95 o
   5   1  17       7053.25       6090.60       777.44 o
   6   1  17       1147.82       1022.09       223.85 o
   7   1  17      20070.98      21673.27       290.79 o
   8   1  17       3940.07       4759.88       335.01 o
   9   1  17       7547.64       7866.96       461.81 o
  10   1  17         13.27        263.25       204.74 o
  11   1  17        460.61        443.84       224.91 o
  12   1  17         11.26         91.07       202.09 o
  13   1  17       1399.53       1325.45       211.48 o
  14   1  17       1546.10       1521.07       212.71 o
  15   1  17        513.01        433.35       182.15 o
   0   2  17       2423.26       2632.22       477.51 o
   1   2  17       7008.50       6713.20       580.38 o
   2   2  17       2206.20       2202.58       245.67 o
   3   2  17       5443.30       5640.72       249.23 o
   4   2  17        106.04         37.01       228.04 o
   5   2  17       1910.75       2065.92       207.10 o
   6   2  17       1929.43       2086.45       231.38 o
   7   2  17       2018.45       2100.14       269.47 o
   8   2  17        584.88        764.27       236.75 o
   9   2  17       1019.54       1288.41       213.29 o
  10   2  17        100.64        138.98       211.36 o
  11   2  17       2159.33       2180.42       236.49 o
  12   2  17        456.85        422.70       201.88 o
  13   2  17          9.93        278.07       202.68 o
  14   2  17          8.54         47.82       193.28 o
  15   2  17        164.05         15.79       176.64 o
   1   3  17      20252.57      20713.24       322.55 o
   2   3  17        215.20        304.88       240.08 o
   3   3  17      12057.41      11759.59       305.55 o
   4   3  17       2184.49       2261.83       242.17 o
   5   3  17       5714.55       6003.56       288.63 o
   6   3  17       2754.16       2922.50       209.29 o
   7   3  17       6523.69       6583.40       223.32 o
   8   3  17        227.56        539.57       210.86 o
   9   3  17        715.14        817.31       216.13 o
  10   3  17        769.24       1094.45       219.77 o
  11   3  17        166.09        -29.61       217.56 o
  12   3  17          6.78        403.25       203.26 o
  13   3  17        484.14        632.27       202.40 o
  14   3  17        746.73        552.30       187.97 o
  15   3  17       1419.21        916.02       192.26 o
   0   4  17       7316.60       5785.73      2033.61 o
   1   4  17       6773.40       6658.11       278.40 o
   2   4  17         22.30        119.85       234.00 o
   3   4  17       2679.52       3401.64       236.79 o
   4   4  17       3047.96       3292.84       231.81 o
   5   4  17       4460.73       4311.29       238.03 o
   6   4  17        761.88        904.39       234.87 o
   7   4  17       3582.64       3502.88       232.87 o
   8   4  17        945.42       1000.63       218.87 o
   9   4  17        340.46        178.82       198.30 o
  10   4  17       2156.31       2440.49       289.60 o
  11   4  17       7068.34       7055.13       236.77 o
  12   4  17         47.69        318.39       203.23 o
  13   4  17       2674.97       2659.69       234.49 o
  14   4  17        430.61        488.95       199.72 o
  15   4  17        627.89        427.31       175.58 o
   1   5  17       3444.75       2807.19       220.57 o
   2   5  17          5.08         25.74       241.33 o
   3   5  17       2020.98       2404.93       230.55 o
   4   5  17       3382.02       3424.06       234.71 o
   5   5  17       2618.17       2485.44       230.76 o
   6   5  17        969.24       1067.81       224.12 o
   7   5  17        558.72        583.35       216.77 o
   8   5  17       6828.72       7276.52       244.54 o
   9   5  17         85.81         49.06       220.73 o
  10   5  17       3000.09       2930.74       493.39 o
  11   5  17         58.67        227.88       190.85 o
  12   5  17       1057.71       1135.48       211.36 o
  13   5  17        951.22        772.03       193.94 o
  14   5  17        248.56        211.17       191.47 o
  15   5  17        256.99        227.49       184.33 o
   0   6  17       1955.80       1721.41       505.58 o
   1   6  17         66.72        100.96       227.00 o
   2   6  17       1773.39       1887.25       219.61 o
   3   6  17       1577.15       2219.17       420.37 o
   4   6  17       6870.46       6631.48       741.46 o
   5   6  17       1053.43       1193.41       221.21 o
   6   6  17        649.12        724.59       233.73 o
   7   6  17        105.63        153.64       227.53 o
   8   6  17       1008.74       1069.91       218.49 o
   9   6  17       1507.65       1693.69       219.19 o
  10   6  17        988.44        743.53       355.84 o
  11   6  17        286.65        286.79       245.94 o
  12   6  17          0.01         65.71       203.83 o
  13   6  17       3670.08       3003.72       207.93 o
  14   6  17          4.84         13.73       188.25 o
  15   6  17        987.20        692.53       183.34 o
   1   7  17       9457.52       9730.01       262.64 o
   2   7  17         42.98        314.75       212.69 o
   3   7  17      27610.38      28775.55       345.86 o
   4   7  17       3520.42       3728.11       248.59 o
   5   7  17       1794.41       1899.40       233.18 o
   6   7  17       2767.30       2869.91       221.69 o
   7   7  17        523.34        783.97       215.97 o
   8   7  17        809.47        954.50       214.95 o
   9   7  17        293.85        390.19       217.45 o
  10   7  17       2596.68       2419.90       217.72 o
  11   7  17        721.72        893.60       219.85 o
  12   7  17       1327.89       1449.67       209.00 o
  13   7  17        385.36        290.12       190.08 o
  14   7  17        101.17        147.00       198.10 o
   0   8  17         12.79        -54.97       296.58 o
   1   8  17         20.00        107.04       205.76 o
   2   8  17        815.94        810.52       216.04 o
   3   8  17      12521.30      12904.35       298.48 o
   4   8  17        622.35        461.66       233.25 o
   5   8  17        966.17        860.47       225.53 o
   6   8  17         54.85         -3.21       209.68 o
   7   8  17       3667.42       3507.50       262.48 o
   8   8  17         83.90        155.97       213.54 o
   9   8  17       5027.35       5379.41       246.80 o
  10   8  17        393.75        651.83       221.07 o
  11   8  17        990.86        860.17       220.13 o
  12   8  17         41.72        299.71       188.11 o
  13   8  17       1814.16       2118.92       513.35 o
  14   8  17        185.46         77.19       250.48 o
   1   9  17       6745.84       6032.14       364.73 o
   2   9  17        574.79        470.34       219.25 o
   3   9  17       3958.70       3959.61       238.32 o
   4   9  17       1486.52       1437.12       229.96 o
   5   9  17       2450.70       2496.22       322.47 o
   6   9  17       1474.50       1765.74       215.84 o
   7   9  17        302.53         -1.35       220.59 o
   8   9  17        985.90        972.78       212.39 o
   9   9  17       1952.03       1905.38       213.46 o
  10   9  17         16.42        -24.29       215.55 o
  11   9  17         37.16        -28.46       221.20 o
  12   9  17        818.62        452.32       293.91 o
  13   9  17        153.03       -176.47       269.45 o
  14   9  17         53.41        -29.40       309.93 o
   0  10  17       1453.49       1363.09       378.12 o
   1  10  17       3286.16       3320.08       227.80 o
   2  10  17       2445.43       2307.38       322.06 o
   3  10  17       2371.72       2338.23       250.65 o
   4  10  17       5370.07       5063.87       429.14 o
   5  10  17        260.58        423.23       206.93 o
   6  10  17       1265.58       1405.16       214.66 o
   7  10  17         56.43        289.78       204.74 o
   8  10  17       1856.12       1619.26       331.85 o
   9  10  17        946.50        890.87       221.34 o
  10  10  17         45.07         79.08       200.10 o
  11  10  17       1101.71       1268.24       334.96 o
  12  10  17        323.29        314.31       241.27 o
  13  10  17       1693.20       1351.92       318.35 o
   1  11  17        308.33        313.62       203.99 o
   2  11  17          4.00          4.18       220.06 o
   3  11  17       5769.81       5699.16       327.87 o
   4  11  17        964.48        940.68       198.77 o
   5  11  17       1540.92       1776.70       220.12 o
   6  11  17        251.45        482.55       217.49 o
   7  11  17        118.11        111.48       242.58 o
   8  11  17       1550.80       1387.85       208.66 o
   9  11  17        289.87       -185.84       217.48 o
  10  11  17          2.75        441.26       236.12 o
  11  11  17         96.04       -195.59       287.59 o
  12  11  17        730.41       1190.62       329.24 o
  13  11  17        662.85         58.73       310.20 o
   0  12  17      11212.51      11498.35       362.66 o
   1  12  17       2603.99       2467.89       236.07 o
   2  12  17        837.80        693.34       226.52 o
   3  12  17       4437.87       4911.50       285.73 o
   4  12  17        229.62        580.61       194.25 o
   5  12  17       1777.96       2103.73       221.48 o
   6  12  17          8.14       -201.11       206.12 o
   7  12  17       1275.35       1621.57       228.09 o
   8  12  17        127.12        161.55       214.00 o
   9  12  17       1255.52       1620.19       236.21 o
  10  12  17        447.76         74.40       249.57 o
  11  12  17       1336.06       1760.11       246.21 o
  12  12  17         98.69        -77.01       293.76 o
  13  12  17        337.63        214.66       426.85 o
   1  13  17       6849.55       6875.03       244.62 o
   2  13  17         28.28         45.91       208.11 o
   3  13  17       1802.99       1895.61       222.76 o
   4  13  17        230.71        335.52       206.40 o
   5  13  17       5390.45       4997.14       242.65 o
   6  13  17        896.45        743.33       206.86 o
   7  13  17        146.00         99.69       197.62 o
   8  13  17         30.96        103.50       282.87 o
   9  13  17       1198.81        754.12       289.84 o
  10  13  17         54.80         52.23       281.56 o
  11  13  17          6.64       -284.86       284.86 o
  12  13  17        630.95        451.49       365.59 o
   0  14  17      10776.40      10748.92       367.71 o
   1  14  17      11865.32      11987.00       486.56 o
   2  14  17       6790.55       6753.54       258.98 o
   3  14  17        287.67        -47.57       218.28 o
   4  14  17        873.55        734.82       210.21 o
   5  14  17        316.22        635.88       200.79 o
   6  14  17        674.72        630.34       213.04 o
   7  14  17       5360.62       5088.63       253.18 o
   8  14  17          2.60         58.40       237.65 o
   9  14  17       4967.05       4789.38       262.66 o
  10  14  17        209.54        143.27       285.88 o
  11  14  17        545.01        599.85       427.91 o
   1  15  17       2482.96       2366.36       233.96 o
   2  15  17       2742.90       2904.47       220.75 o
   3  15  17        287.07        165.26       203.77 o
   4  15  17          5.32        342.46       194.24 o
   5  15  17       1364.70       1457.97       216.17 o
   6  15  17       1095.68       1124.53       273.46 o
   7  15  17        188.84         49.24       247.21 o
   8  15  17         18.13        -23.33       303.76 o
   9  15  17         53.30         61.79       298.60 o
  10  15  17          9.07        256.32       298.65 o
  11  15  17        396.73       -218.93       308.87 o
   0  16  17       1523.30       1438.16       656.16 o
   1  16  17         48.71       -112.38       227.78 o
   2  16  17        881.18        485.54       219.03 o
   3  16  17       1668.21       1698.05       248.44 o
   4  16  17       1436.35       1206.34       245.30 o
   5  16  17        320.84        509.52       212.00 o
   6  16  17        897.26        495.82       297.10 o
   7  16  17       2477.17       2603.32       328.65 o
   8  16  17        532.39        582.02       422.43 o
   9  16  17       1031.28       1976.88       684.05 o
  10  16  17        373.75        117.61       421.73 o
   1  17  17          3.78         91.50       327.46 o
   2  17  17          1.15        376.22       302.97 o
   3  17  17        471.89        793.23       341.21 o
   4  17  17         63.32         57.25       302.82 o
   5  17  17        376.10        332.81       249.63 o
   6  17  17        643.09        974.09       311.40 o
   7  17  17        358.11        467.20       309.70 o
   8  17  17        433.22        702.23       464.62 o
   9  17  17        112.75        -20.12       624.91 o
   0  18  17         98.07        287.04       431.79 o
   1  18  17        448.74        572.08       305.86 o
   2  18  17        177.10        350.36       291.57 o
   3  18  17        154.86        685.25       290.83 o
   4  18  17        433.80        743.84       309.19 o
   5  18  17        766.82        532.84       302.75 o
   6  18  17        327.31        148.18       303.86 o
   7  18  17         37.45         94.23       302.45 o
   8  18  17        917.25        462.51       469.57 o
   1  19  17          0.79       -109.50       306.29 o
   2  19  17         36.06        400.61       352.18 o
   3  19  17         46.88        195.01       307.97 o
   4  19  17        452.39        -20.59       310.68 o
   5  19  17        209.90       -217.87       323.33 o
   6  19  17        578.41       1030.86       317.63 o
   7  19  17          0.87       -200.89       448.74 o
   0  20  17       1005.54        759.43       462.15 o
   1  20  17        262.58        -86.45       349.53 o
   2  20  17        512.57        247.76       427.91 o
   3  20  17        701.37        679.69       322.80 o
   4  20  17        620.05        142.15       312.73 o
   5  20  17         63.50        234.56       333.79 o
   1  21  17        128.84       -308.64       308.64 o
   2  21  17       1025.32        604.31       323.82 o
   3  21  17         15.56       -195.58       316.04 o
   0   0  18      25381.67      26858.52       689.52 o
   1   0  18       5320.26       5272.36       374.39 o
   2   0  18      16369.22      17311.02       533.82 o
   3   0  18       1443.04       1092.25       271.50 o
   4   0  18       6955.01       7043.03       976.56 o
   5   0  18       2223.42       2253.00       477.16 o
   6   0  18        910.13        628.46       329.17 o
   7   0  18       4473.41       4686.73       589.25 o
   8   0  18       2153.22       1689.58       326.10 o
   9   0  18      14427.74      15313.55       570.01 o
  10   0  18       1029.34        789.62       290.65 o
  11   0  18          5.60        202.05       277.67 o
  12   0  18       1220.65       1105.22       292.32 o
  13   0  18       2874.14       2960.06       343.35 o
  14   0  18        657.02        565.41       290.63 o
  15   0  18       1020.20        664.06       305.84 o
   1   1  18         42.98       -141.64       249.53 o
   2   1  18         62.97        206.53       211.99 o
   3   1  18          4.97        -12.02       242.71 o
   4   1  18         54.23        160.05       204.68 o
   5   1  18         80.61        354.95       229.13 o
   6   1  18       7246.72       7540.41       265.87 o
   7   1  18        982.35       1062.13       273.30 o
   8   1  18        772.91        742.83       227.16 o
   9   1  18         12.79         32.64       213.77 o
  10   1  18        126.37         57.84       201.80 o
  11   1  18         29.71         52.40       191.61 o
  12   1  18        130.31         75.19       201.94 o
  13   1  18        159.64         54.49       217.72 o
  14   1  18        429.42        370.53       215.90 o
  15   1  18         53.48         11.63       171.02 o
   0   2  18      34786.10      34940.66       849.63 o
   1   2  18       1787.50       1603.13       222.82 o
   2   2  18      19911.69      19097.38       294.56 o
   3   2  18       2226.08       2110.87       233.92 o
   4   2  18      12681.91      12771.66       267.74 o
   5   2  18        359.16        415.86       198.81 o
   6   2  18       1890.85       1941.53       229.42 o
   7   2  18       2459.94       2671.77       267.64 o
   8   2  18       4366.52       4932.05       235.97 o
   9   2  18       6170.01       6036.18       251.19 o
  10   2  18        240.64        158.25       271.56 o
  11   2  18        701.46        601.09       216.61 o
  12   2  18       1304.96       1261.43       223.98 o
  13   2  18       2887.47       2168.45       262.19 o
  14   2  18          2.85        225.82       213.27 o
  15   2  18       1204.33       1083.40       178.88 o
   1   3  18        938.98        895.76       240.78 o
   2   3  18       1714.73       1492.12       240.15 o
   3   3  18        396.32        219.64       232.47 o
   4   3  18         80.56         -5.69       220.66 o
   5   3  18        258.36        593.02       224.79 o
   6   3  18        420.23        280.23       223.51 o
   7   3  18       2764.10       3095.45       240.45 o
   8   3  18         21.82       -212.76       215.60 o
   9   3  18          2.73        453.28       208.49 o
  10   3  18        730.74        693.55       222.48 o
  11   3  18          3.57        303.12       207.76 o
  12   3  18        229.11        696.71       235.89 o
  13   3  18         24.37        459.09       217.23 o
  14   3  18        194.99        138.76       186.27 o
  15   3  18        195.42        159.16       195.31 o
   0   4  18         67.21        -96.51       336.14 o
   1   4  18        258.70         84.89       248.87 o
   2   4  18        924.73        553.29       231.31 o
   3   4  18        822.90        681.56       231.20 o
   4   4  18       1638.40       1614.96       252.38 o
   5   4  18        715.46        506.94       239.10 o
   6   4  18       4882.49       4401.69       243.43 o
   7   4  18       1153.57       1257.60       377.51 o
   8   4  18       4592.23       4938.94       254.19 o
   9   4  18       2001.08       2675.50       215.66 o
  10   4  18        462.31        642.46       195.86 o
  11   4  18        815.97        701.85       207.82 o
  12   4  18       1297.44       1243.66       276.91 o
  13   4  18          7.50        264.07       222.44 o
  14   4  18        224.68        206.89       191.63 o
  15   4  18        425.85        271.17       191.94 o
   1   5  18       3906.05       3794.50       211.89 o
   2   5  18        213.91         -1.41       230.46 o
   3   5  18       2971.81       3358.43       239.43 o
   4   5  18       7259.57       7966.91       266.73 o
   5   5  18        497.76        395.53       221.96 o
   6   5  18         89.70        625.97       222.49 o
   7   5  18        476.63        460.88       229.30 o
   8   5  18        634.11       1088.74       226.83 o
   9   5  18        677.13        697.54       225.03 o
  10   5  18       6453.34       6889.12       887.69 o
  11   5  18         31.20        108.42       208.12 o
  12   5  18       1939.06       1905.15       208.36 o
  13   5  18          2.85        -67.23       185.72 o
  14   5  18        360.34        201.03       185.30 o
  15   5  18        101.25        -47.93       188.25 o
   0   6  18       6400.74       6371.05       339.79 o
   1   6  18        485.75        690.07       326.09 o
   2   6  18       9154.60       9186.97       236.38 o
   3   6  18       2239.65       2237.40       307.18 o
   4   6  18       4221.95       4255.42       238.92 o
   5   6  18          5.34        326.79       221.17 o
   6   6  18      12115.27      13455.12       696.90 o
   7   6  18       2208.26       2711.56       219.87 o
   8   6  18       1452.46       1452.99       216.95 o
   9   6  18        493.40        506.79       251.49 o
  10   6  18        165.15        155.77       252.12 o
  11   6  18          4.96         23.32       242.52 o
  12   6  18        344.77        177.65       207.48 o
  13   6  18          2.63         64.33       193.97 o
  14   6  18        205.72         87.36       198.47 o
   1   7  18        531.47        499.66       217.20 o
   2   7  18        245.99        319.08       218.92 o
   3   7  18        479.76        422.34       228.45 o
   4   7  18       3426.43       3410.06       239.87 o
   5   7  18         79.79         37.33       217.23 o
   6   7  18         77.02        218.89       209.63 o
   7   7  18         12.18         14.74       201.99 o
   8   7  18         37.18        120.11       210.52 o
   9   7  18          0.52       -219.25       219.25 o
  10   7  18       1467.36       1443.36       210.54 o
  11   7  18         10.07        129.64       220.89 o
  12   7  18        790.84        906.78       224.91 o
  13   7  18        215.91        262.35       186.47 o
  14   7  18          8.69         41.34       242.54 o
   0   8  18       3090.78       2922.37       308.89 o
   1   8  18         10.11        -88.42       212.84 o
   2   8  18       2582.33       2835.98       282.93 o
   3   8  18        260.57        200.32       205.86 o
   4   8  18       4078.43       4616.14       325.25 o
   5   8  18        964.60        545.40       227.01 o
   6   8  18       3185.51       2909.40       252.15 o
   7   8  18       1212.20       1652.12       255.84 o
   8   8  18       1378.63       1795.33       213.58 o
   9   8  18         28.87         54.75       225.05 o
  10   8  18        503.41        436.72       223.41 o
  11   8  18         28.03        264.74       218.91 o
  12   8  18         77.54        156.50       193.30 o
  13   8  18         50.78        117.07       242.59 o
  14   8  18        280.67         55.03       282.36 o
   1   9  18       1273.60       1612.27       221.62 o
   2   9  18         59.83        149.88       214.50 o
   3   9  18       4141.91       4399.78       218.62 o
   4   9  18        546.98        533.78       219.72 o
   5   9  18       5406.27       5634.59       229.65 o
   6   9  18        468.97        584.83       214.14 o
   7   9  18       1307.18       1218.26       220.34 o
   8   9  18       1294.61       1239.80       214.16 o
   9   9  18         98.88        183.34       200.40 o
  10   9  18        879.80       1010.07       241.18 o
  11   9  18        701.00        480.46       227.46 o
  12   9  18        577.11        793.81       297.46 o
  13   9  18         23.94        181.44       236.72 o
  14   9  18        370.13        343.91       250.64 o
   0  10  18       6155.55       6008.85       323.63 o
   1  10  18        189.31        127.16       212.77 o
   2  10  18       1794.27       1969.76       344.54 o
   3  10  18        927.68        593.20       227.31 o
   4  10  18       3114.25       3342.06       222.53 o
   5  10  18       6094.57       6137.56       254.93 o
   6  10  18        835.54       1434.24       257.24 o
   7  10  18        329.18        365.88       221.36 o
   8  10  18        537.47        655.89       206.39 o
   9  10  18         17.42        268.12       236.78 o
  10  10  18         35.39        -14.70       220.76 o
  11  10  18        356.18        492.39       425.21 o
  12  10  18        208.17        257.76       252.41 o
  13  10  18        815.61        212.30       302.19 o
   1  11  18        151.38        311.84       215.93 o
   2  11  18       2795.13       2645.31       226.66 o
   3  11  18        825.36       1049.84       221.85 o
   4  11  18         59.98       -167.90       192.95 o
   5  11  18       1125.54        844.19       212.18 o
   6  11  18       3271.63       3106.55       221.43 o
   7  11  18        288.33         52.11       235.37 o
   8  11  18       8520.77       8440.87       302.76 o
   9  11  18         92.36        -60.41       196.12 o
  10  11  18        915.83        645.47       237.26 o
  11  11  18         90.09        -50.77       258.46 o
  12  11  18        456.67        353.15       292.19 o
  13  11  18         67.69         43.16       297.89 o
   0  12  18      21002.71      21187.00       420.17 o
   1  12  18        243.85        270.00       208.95 o
   2  12  18       3068.65       3081.19       228.93 o
   3  12  18       3428.06       3625.46       240.49 o
   4  12  18        298.02        451.98       192.13 o
   5  12  18         20.00        419.89       214.85 o
   6  12  18       7417.50       7602.36       476.62 o
   7  12  18        990.39       1004.16       208.61 o
   8  12  18       1858.83       1664.11       218.68 o
   9  12  18       2273.16       2470.46       242.02 o
  10  12  18        803.92        530.81       253.99 o
  11  12  18        173.08        164.49       233.01 o
  12  12  18         56.04        286.07       259.64 o
   1  13  18       2523.92       2622.22       223.95 o
   2  13  18        532.50        454.75       208.09 o
   3  13  18       1134.04       1357.83       240.16 o
   4  13  18       2733.65       2701.67       217.59 o
   5  13  18        806.76        714.36       214.35 o
   6  13  18       3295.20       3161.81       238.67 o
   7  13  18          3.95         -2.61       236.02 o
   8  13  18        324.39        209.91       333.94 o
   9  13  18         99.78        -63.47       255.97 o
  10  13  18         35.03       -270.16       330.92 o
  11  13  18          5.57       -190.12       282.36 o
  12  13  18        698.14        764.28       305.61 o
   0  14  18      10403.52      10251.49       369.12 o
   1  14  18         23.58         33.99       212.71 o
   2  14  18        593.94        460.97       212.10 o
   3  14  18        184.07        392.46       216.37 o
   4  14  18         11.81         23.70       249.46 o
   5  14  18        656.30        739.69       223.42 o
   6  14  18       1060.37        749.22       247.59 o
   7  14  18        204.76       -249.69       249.69 o
   8  14  18       1158.80       1084.11       253.03 o
   9  14  18          0.61        225.80       242.42 o
  10  14  18          2.68         31.79       293.66 o
  11  14  18        175.82        -69.85       300.59 o
   1  15  18       5813.45       5808.15       367.16 o
   2  15  18       2011.35       1862.72       211.56 o
   3  15  18       1646.42       1474.12       207.56 o
   4  15  18       3708.63       3978.34       228.85 o
   5  15  18         57.68        120.28       185.02 o
   6  15  18       2890.65       2754.31       255.01 o
   7  15  18         60.87        246.68       270.75 o
   8  15  18        196.61        265.10       238.43 o
   9  15  18       1616.65       1770.08       675.93 o
  10  15  18       1842.18       1734.08       593.49 o
   0  16  18        714.52       1131.84       295.63 o
   1  16  18         12.93        114.10       203.59 o
   2  16  18        401.66        296.33       221.94 o
   3  16  18        197.44        136.68       202.65 o
   4  16  18         17.21         15.37       239.70 o
   5  16  18        939.24        772.45       226.06 o
   6  16  18        319.15         88.83       235.60 o
   7  16  18         43.75        108.99       312.05 o
   8  16  18         60.90        297.17       313.27 o
   9  16  18        701.43        338.23       444.15 o
  10  16  18         91.22        -17.65       451.91 o
   1  17  18       1027.03       1340.29       249.02 o
   2  17  18       1046.88        881.66       237.33 o
   3  17  18        835.83        475.19       305.85 o
   4  17  18        323.74        415.86       285.22 o
   5  17  18          8.79         59.67       254.05 o
   6  17  18         11.90         -7.72       322.25 o
   7  17  18        717.59        706.07       554.12 o
   8  17  18       1111.26       1580.99       660.22 o
   9  17  18         93.35        837.45       659.87 o
   0  18  18         11.96        121.10       425.08 o
   1  18  18         56.96        339.25       303.04 o
   2  18  18         33.72         69.97       288.73 o
   3  18  18         34.02        251.49       299.38 o
   4  18  18        147.23        -58.60       329.58 o
   5  18  18          0.16        179.03       253.84 o
   6  18  18          4.93        202.31       342.42 o
   7  18  18         55.69       -397.54       463.92 o
   8  18  18          1.32       -279.97       449.09 o
   1  19  18         73.14        -15.14       442.56 o
   2  19  18        592.90        334.33       364.71 o
   3  19  18        153.39        557.06       310.63 o
   4  19  18        715.77        826.51       464.27 o
   5  19  18        398.81        353.84       253.26 o
   6  19  18       1406.16       1166.07       440.09 o
   0  20  18        179.69        378.83       455.09 o
   1  20  18        127.28        174.12       303.37 o
   2  20  18         42.91          9.05       364.10 o
   3  20  18        191.47         88.64       297.33 o
   4  20  18        677.01        360.47       500.28 o
   5  20  18        263.53        256.16       286.82 o
   1  21  18         12.14       -224.89       305.71 o
   2  21  18        323.60        201.08       452.44 o
   1   1  19      12436.82      13010.55       338.78 o
   2   1  19       5887.50       6180.95       227.84 o
   3   1  19          7.93        -79.82       222.08 o
   4   1  19       2820.34       2944.36       211.02 o
   5   1  19         23.36        260.07       236.99 o
   6   1  19       1229.17       1197.41       228.53 o
   7   1  19          8.42       -134.26       228.44 o
   8   1  19      14285.50      13995.53       938.17 o
   9   1  19        262.73        249.25       202.80 o
  10   1  19        391.21        520.34       209.53 o
  11   1  19         28.55        112.26       211.32 o
  12   1  19        991.48        790.27       209.79 o
  13   1  19       1047.03        881.00       237.30 o
  14   1  19       4985.52       4602.27       232.84 o
  15   1  19          0.23        249.13       211.97 o
   0   2  19       5988.63       6408.27       364.74 o
   1   2  19        245.20        354.16       219.78 o
   2   2  19        120.73       -121.58       234.34 o
   3   2  19       3449.73       4061.52       243.33 o
   4   2  19         14.93        -67.82       222.36 o
   5   2  19       2427.70       2458.08       286.73 o
   6   2  19       3101.24       3294.92       217.08 o
   7   2  19       2357.09       2257.81       228.17 o
   8   2  19        466.86        574.90       220.17 o
   9   2  19          3.53       -226.35       226.35 o
  10   2  19       1259.34       1246.84       208.65 o
  11   2  19        203.01       -216.57       216.57 o
  12   2  19       1057.49        698.33       208.16 o
  13   2  19        422.88        351.42       210.22 o
  14   2  19         90.79       -100.87       215.16 o
  15   2  19          3.45       -174.47       187.41 o
   1   3  19        392.65        540.33       234.97 o
   2   3  19       2201.10       2373.51       242.30 o
   3   3  19        133.04        327.24       226.67 o
   4   3  19        256.13        153.85       218.28 o
   5   3  19       7277.50       8365.36       256.59 o
   6   3  19       3572.00       3442.36       536.60 o
   7   3  19       2403.00       2362.05       208.34 o
   8   3  19      11604.01      11915.94       251.87 o
   9   3  19       1293.38       1040.08       218.54 o
  10   3  19        798.03        920.45       219.53 o
  11   3  19       2080.65       2118.37       220.83 o
  12   3  19       1733.35       1842.10       217.50 o
  13   3  19          3.70        -70.48       204.34 o
  14   3  19       2023.73       1795.13       226.02 o
  15   3  19         10.69        -16.59       202.88 o
   0   4  19         16.05        -74.71       259.60 o
   1   4  19       7697.61       8213.68       270.65 o
   2   4  19          8.00        367.06       243.75 o
   3   4  19        573.79        542.44       224.06 o
   4   4  19        412.63        289.26       240.85 o
   5   4  19       2950.98       3220.10       236.77 o
   6   4  19       3158.67       3803.21       453.18 o
   7   4  19         92.25        233.29       216.46 o
   8   4  19       2856.87       3130.53       230.69 o
   9   4  19          5.28        158.70       190.72 o
  10   4  19          3.56       -189.40       189.40 o
  11   4  19         50.59        -62.71       187.01 o
  12   4  19         93.45        365.59       184.94 o
  13   4  19       1825.27       1490.48       200.76 o
  14   4  19         70.22        -10.80       188.90 o
   1   5  19         34.77         45.04       200.14 o
   2   5  19       1224.58       1404.85       227.85 o
   3   5  19      11843.38      12649.34       272.45 o
   4   5  19        938.56       1118.56       231.02 o
   5   5  19        840.41       1198.67       266.64 o
   6   5  19       6244.03       6428.80       348.61 o
   7   5  19        200.32        156.52       243.33 o
   8   5  19       2985.81       3424.45       229.52 o
   9   5  19       2278.91       2132.61       231.56 o
  10   5  19       1422.96       1931.38       221.51 o
  11   5  19         92.54        483.42       206.35 o
  12   5  19        924.34       1096.96       213.03 o
  13   5  19         62.93         20.40       208.23 o
  14   5  19       1006.55        866.97       208.00 o
   0   6  19       2214.65       2469.97       317.65 o
   1   6  19         42.67         30.90       218.10 o
   2   6  19        852.31        961.84       224.27 o
   3   6  19       5664.54       5914.26       307.44 o
   4   6  19        429.37        438.47       224.04 o
   5   6  19        142.48         13.75       219.30 o
   6   6  19        995.70       1329.85       230.02 o
   7   6  19        517.27       1052.97       312.69 o
   8   6  19        137.04        189.10       214.45 o
   9   6  19       1370.26       1555.17       280.70 o
  10   6  19         39.39        -35.65       238.73 o
  11   6  19        131.23        200.02       209.98 o
  12   6  19         47.88         48.76       207.88 o
  13   6  19        609.88        740.20       210.50 o
  14   6  19          9.94        128.21       214.88 o
   1   7  19         15.70        133.65       219.75 o
   2   7  19         11.79         41.17       264.63 o
   3   7  19         32.95         19.26       221.25 o
   4   7  19       2227.17       2401.66       233.99 o
   5   7  19         55.99        145.54       234.62 o
   6   7  19         65.32        160.82       211.43 o
   7   7  19          6.08         41.86       206.30 o
   8   7  19       2252.27       2366.64       221.06 o
   9   7  19        115.58        103.63       207.83 o
  10   7  19       1371.68       1327.76       243.01 o
  11   7  19         28.36         59.50       261.08 o
  12   7  19       2498.79       2430.02       300.97 o
  13   7  19        804.45        714.52       201.19 o
  14   7  19       1025.50       1057.54       211.90 o
   0   8  19        907.51        801.34       545.47 o
   1   8  19        465.97        390.39       213.09 o
   2   8  19       4366.07       4189.51       253.21 o
   3   8  19       1313.17       1090.34       230.10 o
   4   8  19        179.71        201.51       222.85 o
   5   8  19        188.45        466.27       440.52 o
   6   8  19        115.65        -61.23       208.30 o
   7   8  19       1466.39       1515.25       273.61 o
   8   8  19        517.76        606.04       215.42 o
   9   8  19       2798.10       2462.89       318.34 o
  10   8  19        582.13        260.13       210.57 o
  11   8  19        228.81        373.59       203.78 o
  12   8  19       1412.81       1237.89       235.55 o
  13   8  19        479.74        464.96       198.90 o
  14   8  19          0.77       -151.55       267.91 o
   1   9  19       1029.18       1265.93       233.15 o
   2   9  19        350.40        578.00       233.01 o
   3   9  19        928.48        785.91       204.33 o
   4   9  19       3158.98       3348.12       231.79 o
   5   9  19         65.42        -30.34       299.99 o
   6   9  19       1015.65       1176.52       376.18 o
   7   9  19       1849.68       2252.26       245.09 o
   8   9  19       4988.03       5013.45       227.68 o
   9   9  19        623.29        524.86       219.24 o
  10   9  19       4400.27       4322.64       235.04 o
  11   9  19        372.90        186.76       208.82 o
  12   9  19       2571.60       2060.48       272.75 o
  13   9  19         18.70       -132.06       242.89 o
   0  10  19       3538.30       2905.72       773.90 o
   1  10  19          3.70        420.12       290.32 o
   2  10  19        457.86        313.13       230.31 o
   3  10  19         60.20        336.81       210.24 o
   4  10  19       8756.05       9330.29       248.38 o
   5  10  19       1401.79       1754.72       237.15 o
   6  10  19        583.01        745.23       228.71 o
   7  10  19         57.34        -73.61       221.59 o
   8  10  19         47.72        413.65       202.03 o
   9  10  19       1061.84        876.33       237.60 o
  10  10  19        272.82       -175.73       262.45 o
  11  10  19       2038.41       1884.75       555.54 o
  12  10  19         25.81        336.35       234.63 o
  13  10  19         31.73         47.98       241.48 o
   1  11  19        156.87         72.91       206.04 o
   2  11  19       4104.34       3767.94       783.86 o
   3  11  19         34.24         43.74       214.19 o
   4  11  19        253.92        548.06       245.22 o
   5  11  19        160.63        140.63       214.73 o
   6  11  19        328.98        249.21       213.29 o
   7  11  19          6.95        -61.50       253.16 o
   8  11  19       1618.83       1537.01       337.71 o
   9  11  19       1413.68       1489.39       239.21 o
  10  11  19       1864.59       1709.18       293.53 o
  11  11  19          0.43         25.21       232.41 o
  12  11  19       1630.42       1321.39       357.97 o
   0  12  19       1493.44       1629.81       525.70 o
   1  12  19        208.07         99.41       206.59 o
   2  12  19       3532.28       3832.03       470.71 o
   3  12  19       8158.88       7957.51       244.95 o
   4  12  19       2285.91       2395.02       230.71 o
   5  12  19       3394.60       3373.94       228.36 o
   6  12  19       3134.51       2984.00       342.28 o
   7  12  19        394.27        314.08       218.82 o
   8  12  19         69.27        388.19       211.21 o
   9  12  19        809.33        550.61       261.60 o
  10  12  19        252.78        -68.06       276.51 o
  11  12  19         96.03        288.77       228.94 o
  12  12  19        295.38        503.70       241.57 o
   1  13  19        394.06        809.92       222.91 o
   2  13  19        807.87        920.17       210.30 o
   3  13  19       7017.71       6812.60       245.90 o
   4  13  19       1642.78       1505.99       201.10 o
   5  13  19       1375.67       1103.73       219.08 o
   6  13  19        547.10        626.62       207.85 o
   7  13  19          0.30        240.40       269.36 o
   8  13  19        835.42        952.69       223.59 o
   9  13  19        103.29        201.64       244.25 o
  10  13  19       1806.23       1254.40       244.34 o
  11  13  19        187.15        653.30       324.71 o
   0  14  19      13538.42      13503.70       409.50 o
   1  14  19        462.38        383.13       209.90 o
   2  14  19       5956.77       6138.39       234.02 o
   3  14  19         88.34        350.25       216.44 o
   4  14  19       5956.74       5376.08       246.60 o
   5  14  19         10.92         -2.33       225.15 o
   6  14  19       4482.82       4023.94       713.03 o
   7  14  19        290.78        333.09       204.96 o
   8  14  19        316.99         35.84       386.08 o
   9  14  19         85.14        464.07       234.64 o
  10  14  19        138.09        130.17       236.02 o
  11  14  19        208.77        383.33       302.67 o
   1  15  19       1576.12       1767.62       234.91 o
   2  15  19          8.58       -158.14       215.66 o
   3  15  19          0.44        212.07       200.76 o
   4  15  19        290.44        233.26       206.81 o
   5  15  19       2282.31       2075.38       230.94 o
   6  15  19        180.74        346.47       214.46 o
   7  15  19        205.84        551.43       359.48 o
   8  15  19        164.87        180.10       252.18 o
   9  15  19        123.20         89.22       297.53 o
  10  15  19        115.88       -287.74       642.92 o
   0  16  19       6187.83       6115.77       840.10 o
   1  16  19         65.89        117.94       204.43 o
   2  16  19       5971.56       4964.71       552.56 o
   3  16  19         19.68        172.12       219.45 o
   4  16  19       4077.33       4110.56       231.63 o
   5  16  19        116.87         -1.93       212.09 o
   6  16  19       2542.37       2302.90       592.89 o
   7  16  19        155.78       -153.53       243.48 o
   8  16  19        287.93        342.82       468.51 o
   9  16  19         54.75        -96.74       440.62 o
   1  17  19        267.17        406.23       200.30 o
   2  17  19       1275.76       1063.44       239.71 o
   3  17  19        287.80        273.65       241.02 o
   4  17  19        138.13       -201.90       242.16 o
   5  17  19        155.35        461.41       280.30 o
   6  17  19          1.06        167.49       360.83 o
   7  17  19         39.46        335.40       478.75 o
   8  17  19         63.79       -169.47       468.86 o
   0  18  19       2207.50       1580.99       446.97 o
   1  18  19        555.10        458.89       309.25 o
   2  18  19       3329.95       3869.64       334.39 o
   3  18  19         11.00        261.94       305.04 o
   4  18  19       1156.62        889.78       322.74 o
   5  18  19         19.80       -127.78       262.45 o
   6  18  19         17.45        167.69       319.07 o
   7  18  19         58.17        306.81       649.27 o
   1  19  19        247.75        599.59       297.30 o
   2  19  19         55.46        303.81       296.17 o
   3  19  19          4.35         38.03       293.39 o
   4  19  19          5.70        111.21       445.91 o
   5  19  19         41.82        217.80       260.03 o
   6  19  19         37.94        478.04       496.05 o
   0  20  19       1573.82       1508.26       449.44 o
   1  20  19          1.82       -108.78       305.40 o
   2  20  19       3332.58       3008.01       512.64 o
   3  20  19         18.65        231.36       315.31 o
   4  20  19        912.33        865.34       500.64 o
   0   0  20      44467.40      45787.72       749.19 o
   1   0  20      16369.72      17306.89       415.61 o
   2   0  20      26314.41      27982.72       452.95 o
   3   0  20        682.89        811.82       288.24 o
   4   0  20        497.96        592.82       257.33 o
   5   0  20      10854.07      10544.70       921.66 o
   6   0  20        212.99        -35.21       348.82 o
   7   0  20       9615.88       9571.78       446.09 o
   8   0  20       4601.25       4249.84       329.83 o
   9   0  20       1141.87        922.16       302.14 o
  10   0  20        860.12       1061.02       332.58 o
  11   0  20       3401.59       3744.33       301.76 o
  12   0  20         76.86        357.18       337.20 o
  13   0  20        507.35        668.81       340.35 o
  14   0  20          1.00        -86.85       274.87 o
   1   1  20         16.61        106.48       289.30 o
   2   1  20        133.85        227.69       211.91 o
   3   1  20        301.40        106.31       242.55 o
   4   1  20       1066.22       1215.71       204.92 o
   5   1  20         66.10         27.42       209.80 o
   6   1  20        502.36        668.38       224.90 o
   7   1  20        245.27        362.86       221.33 o
   8   1  20        537.28        578.36       223.11 o
   9   1  20        236.50        536.73       224.26 o
  10   1  20          3.95        210.45       216.11 o
  11   1  20        915.44        977.03       285.88 o
  12   1  20        356.76        572.05       209.46 o
  13   1  20         27.96        226.39       219.59 o
  14   1  20        399.87        208.11       199.32 o
   0   2  20       1767.91       2051.17       333.67 o
   1   2  20         41.19        373.11       207.60 o
   2   2  20      13888.22      14136.55       287.62 o
   3   2  20       3346.14       3077.05       240.17 o
   4   2  20       1810.36       2078.74       246.52 o
   5   2  20       1867.14       2433.34       249.92 o
   6   2  20        608.59        804.96       202.05 o
   7   2  20      10193.90      11026.69       240.38 o
   8   2  20        313.81        585.24       217.24 o
   9   2  20       2019.64       2184.88       220.43 o
  10   2  20       2498.43       2382.89       215.85 o
  11   2  20      10697.12      11321.62       368.67 o
  12   2  20          3.00         81.95       203.87 o
  13   2  20        212.43        107.82       207.65 o
  14   2  20          1.04        138.39       203.23 o
   1   3  20       2554.13       2562.10       216.14 o
   2   3  20        769.70        748.42       277.47 o
   3   3  20       2131.87       1938.00       228.60 o
   4   3  20        999.76       1144.55       226.75 o
   5   3  20       1097.55       1229.21       232.33 o
   6   3  20       1239.49       1323.07       224.81 o
   7   3  20      10203.08      11101.38       260.01 o
   8   3  20        180.25        516.53       197.27 o
   9   3  20       4708.04       4962.60       210.94 o
  10   3  20         62.63        262.39       224.12 o
  11   3  20         24.77        274.80       222.91 o
  12   3  20        860.29        679.25       236.65 o
  13   3  20         30.31        176.93       202.77 o
  14   3  20          4.22       -108.46       211.83 o
   0   4  20        797.78       1031.12       371.18 o
   1   4  20       1221.11       1347.43       278.39 o
   2   4  20       1656.54       1597.37       247.78 o
   3   4  20          6.02        -90.33       229.42 o
   4   4  20       3864.10       3996.92       253.93 o
   5   4  20       1327.73       1432.72       228.68 o
   6   4  20         62.43        244.80       275.95 o
   7   4  20       6071.17       5993.48       242.36 o
   8   4  20        158.57        442.08       215.61 o
   9   4  20       8680.09       9001.73       462.81 o
  10   4  20         80.89        275.41       214.80 o
  11   4  20       1447.28       1490.84       193.06 o
  12   4  20        722.09        446.67       195.84 o
  13   4  20       1493.51       1365.35       209.71 o
  14   4  20         87.27        110.96       202.64 o
   1   5  20       2682.53       2911.49       208.27 o
   2   5  20       1123.92       1232.93       225.53 o
   3   5  20       1626.44       2233.38       231.98 o
   4   5  20       2403.25       2085.50       232.03 o
   5   5  20       1398.97       1305.06       260.98 o
   6   5  20       1128.12       1044.13       217.23 o
   7   5  20         94.14        319.42       222.23 o
   8   5  20        374.17        375.28       245.12 o
   9   5  20       2284.18       2368.93       377.56 o
  10   5  20        159.05         94.21       212.02 o
  11   5  20         19.54        168.28       216.96 o
  12   5  20         24.36        -82.49       210.91 o
  13   5  20        314.43        224.41       213.02 o
  14   5  20         40.93        159.86       199.57 o
   0   6  20       3682.27       3370.86       363.44 o
   1   6  20        788.40       1125.00       209.55 o
   2   6  20       2088.23       2170.35       231.08 o
   3   6  20        401.49        192.61       218.45 o
   4   6  20         53.61        136.79       225.83 o
   5   6  20       1815.96       1916.58       252.10 o
   6   6  20         91.74        252.59       248.19 o
   7   6  20       5157.90       4960.38       602.82 o
   8   6  20        581.87        333.31       252.58 o
   9   6  20       7447.00       7077.88       245.91 o
  10   6  20        909.58       1089.28       223.06 o
  11   6  20        176.98        280.40       209.99 o
  12   6  20         16.56       -199.42       214.07 o
  13   6  20        113.20        257.26       338.83 o
  14   6  20        151.61        -91.17       187.73 o
   1   7  20        645.41        626.87       228.78 o
   2   7  20        116.05        121.59       198.99 o
   3   7  20        804.99        848.39       246.32 o
   4   7  20         58.18        415.81       222.64 o
   5   7  20       3454.61       3423.17       229.56 o
   6   7  20         70.19        350.59       206.84 o
   7   7  20       3729.65       3845.06       223.94 o
   8   7  20        146.31        145.29       218.07 o
   9   7  20       1219.19       1271.94       265.93 o
  10   7  20        261.87        311.53       262.70 o
  11   7  20        705.48        547.46       243.47 o
  12   7  20        291.14        131.80       215.02 o
  13   7  20        545.34        319.04       226.31 o
  14   7  20        937.25        731.70       207.07 o
   0   8  20       2157.86       2146.44       303.94 o
   1   8  20       1741.12       1916.91       224.93 o
   2   8  20       3019.56       2855.09       206.20 o
   3   8  20         46.31        347.20       246.77 o
   4   8  20       1153.35       1145.73       219.46 o
   5   8  20       1250.70       1053.64       211.58 o
   6   8  20       1493.39       1555.17       223.15 o
   7   8  20       4970.69       5287.75       240.65 o
   8   8  20       3478.86       3362.05       224.26 o
   9   8  20        810.09        908.54       211.22 o
  10   8  20        188.15        114.16       217.37 o
  11   8  20        819.39        330.13       244.22 o
  12   8  20         19.97        312.45       209.49 o
  13   8  20        335.85        249.40       190.20 o
   1   9  20       1363.83       1589.23       216.95 o
   2   9  20        398.04        323.50       224.55 o
   3   9  20       9263.96       9752.99       437.18 o
   4   9  20        210.89        543.88       218.76 o
   5   9  20        202.25        228.51       214.96 o
   6   9  20         40.49        -47.10       210.19 o
   7   9  20       1616.02       1746.80       215.66 o
   8   9  20        193.38        288.88       216.30 o
   9   9  20        151.80        182.41       203.68 o
  10   9  20        357.77        400.68       221.30 o
  11   9  20         76.00        -20.75       203.19 o
  12   9  20        982.90       1283.22       231.67 o
  13   9  20         18.79        217.66       245.51 o
   0  10  20       3816.92       3727.81       315.49 o
   1  10  20        263.95        107.54       212.96 o
   2  10  20       4619.48       4827.41       252.10 o
   3  10  20        114.48        299.36       194.93 o
   4  10  20       1410.22       1439.28       231.63 o
   5  10  20       1216.28       1470.98       218.39 o
   6  10  20       1233.42       1323.37       225.92 o
   7  10  20        182.97         70.96       221.24 o
   8  10  20          1.96        255.84       198.24 o
   9  10  20        356.68        597.79       287.77 o
  10  10  20        690.85        393.48       242.75 o
  11  10  20       1315.51       1047.38       255.72 o
  12  10  20         11.70        244.61       293.13 o
  13  10  20        204.21        234.59       268.28 o
   1  11  20       2573.17       2913.84       224.57 o
   2  11  20       1773.33       1889.35       214.90 o
   3  11  20       1016.04       1242.30       203.70 o
   4  11  20         26.51       -154.05       213.34 o
   5  11  20         22.46         40.28       219.26 o
   6  11  20        128.43        290.75       207.09 o
   7  11  20         18.64        -88.42       218.95 o
   8  11  20       1195.84       1474.83       207.99 o
   9  11  20        420.79        675.65       205.55 o
  10  11  20       2015.33       1919.86       294.24 o
  11  11  20          0.51        241.09       234.55 o
  12  11  20        739.96        484.98       335.81 o
   0  12  20        179.69         93.34       432.32 o
   1  12  20        812.49        957.95       240.89 o
   2  12  20       2834.08       2692.28       226.97 o
   3  12  20        525.44        478.48       210.79 o
   4  12  20        919.43        950.40       233.34 o
   5  12  20         21.00        326.80       205.42 o
   6  12  20        346.77        590.44       203.94 o
   7  12  20        194.37        288.08       208.95 o
   8  12  20         30.53        337.33       205.43 o
   9  12  20         83.01        250.83       259.95 o
  10  12  20         86.98          9.41       283.31 o
  11  12  20       1254.26       1178.40       304.65 o
  12  12  20          3.31        -32.20       294.75 o
   1  13  20      13403.08      12644.72       382.35 o
   2  13  20       4680.45       4605.80       230.90 o
   3  13  20      14480.36      13792.61       322.88 o
   4  13  20       1826.99       1740.42       213.71 o
   5  13  20       3299.55       3485.90       227.03 o
   6  13  20        166.67        288.97       219.33 o
   7  13  20       1306.25       1211.08       251.91 o
   8  13  20       3198.88       2960.20       276.50 o
   9  13  20        315.64       -179.84       446.67 o
  10  13  20       1308.75       1313.76       252.99 o
  11  13  20          4.22         -5.58       279.29 o
   0  14  20        291.92         -7.68       304.31 o
   1  14  20        106.94        354.06       232.75 o
   2  14  20       2199.64       2139.27       210.05 o
   3  14  20          8.27       -155.22       211.51 o
   4  14  20         56.45        218.33       191.40 o
   5  14  20       1589.57       1973.35       228.68 o
   6  14  20        285.24         72.77       236.71 o
   7  14  20        149.34       -148.08       228.40 o
   8  14  20         91.79        447.62       240.73 o
   9  14  20        205.08        173.20       233.22 o
  10  14  20          6.17       -174.46       313.32 o
   1  15  20       8604.00       8360.38       252.47 o
   2  15  20          3.15        -13.67       203.01 o
   3  15  20        588.88        819.60       219.81 o
   4  15  20        128.60        361.10       187.91 o
   5  15  20        370.83        365.73       202.88 o
   6  15  20        998.20        940.73       211.62 o
   7  15  20        204.86        278.69       278.51 o
   8  15  20       1690.76       1469.96       300.67 o
   9  15  20        914.16        626.61       296.15 o
  10  15  20         18.52        -37.07       432.85 o
   0  16  20        123.73         32.39       289.43 o
   1  16  20         91.01       -204.42       204.42 o
   2  16  20        117.77         41.99       213.67 o
   3  16  20         94.94        -86.02       200.27 o
   4  16  20         25.60       -189.29       204.31 o
   5  16  20          2.80        239.01       218.90 o
   6  16  20         27.54        -24.24       239.91 o
   7  16  20        224.48        420.73       338.22 o
   8  16  20         82.22          0.53       484.22 o
   9  16  20        310.98         -2.82       447.68 o
   1  17  20       2837.13       2428.02       217.98 o
   2  17  20         77.24         78.53       206.34 o
   3  17  20        772.54        505.59       206.16 o
   4  17  20       1359.52       1447.33       340.72 o
   5  17  20        191.31        249.47       220.28 o
   6  17  20       1971.20       1438.86       338.39 o
   7  17  20         76.98       -199.12       470.98 o
   8  17  20        163.89        307.99       315.31 o
   0  18  20        260.32        254.55       436.73 o
   1  18  20         15.98         68.28       306.45 o
   2  18  20         68.56        121.64       298.87 o
   3  18  20         41.20        -70.23       308.41 o
   4  18  20          1.75        282.45       450.15 o
   5  18  20        261.46        649.49       261.98 o
   6  18  20        107.90       -272.91       462.15 o
   7  18  20         31.73       -319.85       333.17 o
   1  19  20        717.05        709.76       292.62 o
   2  19  20        105.26         33.79       325.34 o
   3  19  20        322.17        211.30       319.05 o
   4  19  20         37.19        364.71       470.63 o
   5  19  20       1414.97        987.74       279.41 o
   0  20  20          8.59         14.83       449.44 o
   1  20  20         60.10         58.34       310.31 o
   2  20  20          4.11       -172.01       308.76 o
   3  20  20         62.78         95.58       309.16 o
   1   1  21      24967.02      25731.50       323.01 o
   2   1  21       4927.28       5068.50       241.04 o
   3   1  21      29310.33      30335.38       424.45 o
   4   1  21        252.21        717.45       240.12 o
   5   1  21      10040.68       9939.37       233.77 o
   6   1  21        102.72        421.39       202.74 o
   7   1  21       7320.65       7274.42       250.67 o
   8   1  21       2189.25       2419.36       232.33 o
   9   1  21        166.90        259.43       204.48 o
  10   1  21       3111.40       3254.16       217.14 o
  11   1  21        304.89        526.44       309.22 o
  12   1  21         51.98        153.93       256.12 o
  13   1  21        462.05        610.98       234.77 o
  14   1  21        257.22        507.23       218.67 o
   0   2  21        648.65        781.50       339.17 o
   1   2  21       2121.23       2272.18       236.59 o
   2   2  21        874.31        856.27       208.57 o
   3   2  21      10044.84      10477.30       477.13 o
   4   2  21        251.93        644.60       241.09 o
   5   2  21       2650.54       2497.09       247.66 o
   6   2  21        620.61        868.30       199.76 o
   7   2  21        235.21        136.47       197.86 o
   8   2  21         34.76         19.36       212.83 o
   9   2  21        273.40        107.02       205.59 o
  10   2  21         15.12        305.15       226.75 o
  11   2  21        877.24        974.58       211.04 o
  12   2  21       1588.40       1101.56       211.79 o
  13   2  21        283.16        422.72       211.11 o
  14   2  21        317.94        350.07       233.65 o
   1   3  21      25632.68      26112.00       515.02 o
   2   3  21        355.32        350.87       233.14 o
   3   3  21       6195.52       6235.76       271.56 o
   4   3  21        603.31        854.24       223.75 o
   5   3  21       4066.89       3793.58       237.23 o
   6   3  21        378.60        330.76       218.34 o
   7   3  21       1742.32       2192.46       275.08 o
   8   3  21       2631.32       2600.81       200.19 o
   9   3  21        478.90        657.00       207.34 o
  10   3  21        327.50        362.77       190.68 o
  11   3  21         36.32        334.87       200.52 o
  12   3  21          2.36        128.26       203.85 o
  13   3  21         57.36        188.13       231.05 o
  14   3  21        199.18        423.35       214.15 o
   0   4  21        149.30        186.64       266.40 o
   1   4  21        968.72        686.86       326.45 o
   2   4  21        120.25         25.16       231.34 o
   3   4  21       1330.78       1277.94       236.14 o
   4   4  21        639.94        678.71       222.22 o
   5   4  21        584.04        617.93       240.85 o
   6   4  21        283.72        285.76       217.77 o
   7   4  21       3515.36       4076.10       259.23 o
   8   4  21       3309.66       3476.47       228.96 o
   9   4  21       5812.12       5881.72       285.78 o
  10   4  21        230.36        471.62       208.20 o
  11   4  21       4932.84       4608.83       210.32 o
  12   4  21        219.31        473.55       187.97 o
  13   4  21       1151.32       1201.25       271.23 o
  14   4  21        129.78        174.20       225.92 o
   1   5  21      11696.91      12495.14       270.84 o
   2   5  21        451.94        848.96       229.52 o
   3   5  21       7707.31       7755.79       286.95 o
   4   5  21          4.13         49.24       238.79 o
   5   5  21       4680.33       4618.80       235.43 o
   6   5  21         48.18         34.35       215.59 o
   7   5  21       3127.06       3656.20       226.99 o
   8   5  21        945.69       1306.98       228.20 o
   9   5  21        354.94        333.91       216.06 o
  10   5  21        123.23        166.69       204.77 o
  11   5  21        250.09         48.04       209.71 o
  12   5  21         36.71        326.08       209.16 o
  13   5  21        825.15        551.68       213.07 o
  14   5  21          0.72         92.07       210.22 o
   0   6  21        119.54        -33.99       309.45 o
   1   6  21        284.28        110.37       214.44 o
   2   6  21          2.09       -219.98       219.98 o
   3   6  21        198.33        119.97       247.66 o
   4   6  21        558.87        886.31       223.11 o
   5   6  21        181.95         90.31       247.08 o
   6   6  21        246.24        428.03       243.06 o
   7   6  21        539.21        455.23       232.18 o
   8   6  21        128.14        163.73       298.14 o
   9   6  21       1623.73       1748.11       215.91 o
  10   6  21         51.90        444.60       200.84 o
  11   6  21       2998.53       2875.49       227.35 o
  12   6  21          0.12       -214.68       214.68 o
  13   6  21        559.67        797.09       227.25 o
  14   6  21        165.09        238.48       195.10 o
   1   7  21       3861.00       3926.54       207.21 o
   2   7  21        899.31        915.12       226.57 o
   3   7  21       3563.07       3539.40       243.97 o
   4   7  21       1316.69       1366.71       226.70 o
   5   7  21       2312.36       2263.99       219.03 o
   6   7  21          2.59        264.82       250.52 o
   7   7  21        817.79        829.40       223.53 o
   8   7  21        640.58        704.20       272.37 o
   9   7  21        141.79        -71.08       200.73 o
  10   7  21        233.72         62.14       206.01 o
  11   7  21          1.00        221.04       208.67 o
  12   7  21          4.64        200.87       209.97 o
  13   7  21        179.98        128.88       214.62 o
   0   8  21        995.66       1371.70       352.88 o
   1   8  21        308.86        497.20       236.86 o
   2   8  21        315.08        485.87       260.92 o
   3   8  21       1562.04       1576.11       226.03 o
   4   8  21       1729.04       2046.34       222.98 o
   5   8  21       1606.28       2112.17       232.79 o
   6   8  21       1046.60        715.70       220.52 o
   7   8  21       2195.75       2215.43       229.73 o
   8   8  21         55.71        225.81       200.57 o
   9   8  21       1570.81       1682.51       247.68 o
  10   8  21        197.42        226.95       237.05 o
  11   8  21       2471.75       2567.60       262.28 o
  12   8  21         15.03        239.28       225.04 o
  13   8  21        877.37        323.32       200.27 o
   1   9  21        425.33        867.75       245.69 o
   2   9  21       1763.69       1815.37       208.93 o
   3   9  21       7133.37       7000.82       264.89 o
   4   9  21       1384.09       1478.03       241.12 o
   5   9  21         48.76        149.99       419.48 o
   6   9  21        552.82        648.45       212.76 o
   7   9  21        534.17        475.46       267.07 o
   8   9  21        139.13        290.35       202.65 o
   9   9  21       2783.34       2795.97       221.64 o
  10   9  21         63.81        103.76       215.02 o
  11   9  21         55.36       -217.14       217.14 o
  12   9  21        137.50         75.30       211.57 o
  13   9  21          0.90         98.89       227.36 o
   0  10  21       1206.91       1142.42       368.59 o
   1  10  21       3676.79       4098.81       232.79 o
   2  10  21        554.17        854.77       217.27 o
   3  10  21       2512.28       2661.15       201.85 o
   4  10  21        502.02        733.76       282.91 o
   5  10  21         67.28        161.07       343.16 o
   6  10  21        721.74        659.63       216.95 o
   7  10  21       1656.83       1901.50       290.67 o
   8  10  21        546.79        419.92       242.63 o
   9  10  21       3009.38       3068.53       304.35 o
  10  10  21         84.33       -103.41       254.67 o
  11  10  21        440.46        619.51       251.13 o
  12  10  21         19.10       -136.33       293.36 o
   1  11  21        896.60        916.03       211.93 o
   2  11  21       5575.09       5202.21       229.74 o
   3  11  21       1639.93       1881.14       200.29 o
   4  11  21       3963.33       3695.29       501.95 o
   5  11  21         20.03        -93.16       211.94 o
   6  11  21          0.58        264.74       207.48 o
   7  11  21       1824.14       1621.82       235.33 o
   8  11  21         60.13        275.58       204.79 o
   9  11  21        812.79        916.11       225.81 o
  10  11  21        578.43        679.07       231.81 o
  11  11  21         68.38        -48.13       201.32 o
  12  11  21          8.95        325.07       241.42 o
   0  12  21          5.40       -220.09       298.99 o
   1  12  21       3012.12       3016.10       311.29 o
   2  12  21         28.20        160.28       207.79 o
   3  12  21       4317.14       4459.70       204.44 o
   4  12  21         34.49        138.55       244.86 o
   5  12  21        477.84        601.52       213.98 o
   6  12  21         33.08        -10.76       201.57 o
   7  12  21       6266.82       6089.98       393.92 o
   8  12  21         22.55        -83.30       253.94 o
   9  12  21       3984.76       3815.66       285.43 o
  10  12  21         67.29        -67.76       237.01 o
  11  12  21       1374.49       1264.53       305.11 o
   1  13  21       4344.41       4279.25       226.25 o
   2  13  21       1978.47       1924.39       227.12 o
   3  13  21        739.67        550.67       207.76 o
   4  13  21       2401.80       2097.11       210.29 o
   5  13  21        222.00        328.27       222.14 o
   6  13  21        590.00        734.64       209.92 o
   7  13  21       2890.21       2642.00       493.66 o
   8  13  21        404.50        285.47       224.52 o
   9  13  21       1514.01        764.86       225.61 o
  10  13  21        669.44        796.69       241.29 o
  11  13  21        103.45        191.07       239.71 o
   0  14  21       1901.76       1732.98       320.01 o
   1  14  21         64.58         -8.23       294.28 o
   2  14  21       1331.61       1608.86       208.68 o
   3  14  21        499.64        251.99       205.29 o
   4  14  21        197.76        305.53       224.95 o
   5  14  21        824.92       1306.84       225.47 o
   6  14  21        219.67        512.51       238.24 o
   7  14  21        465.28        660.67       223.02 o
   8  14  21         37.16        121.67       208.74 o
   9  14  21       1208.26       1370.55       304.71 o
  10  14  21         35.67       -146.63       289.89 o
   1  15  21       1542.78       1515.43       210.34 o
   2  15  21       1129.49       1443.34       226.87 o
   3  15  21          3.79        -36.96       204.77 o
   4  15  21        258.16        338.77       186.74 o
   5  15  21       1541.26        696.56       292.92 o
   6  15  21         45.44       -139.75       212.48 o
   7  15  21        113.02         96.93       214.74 o
   8  15  21         11.40       -173.12       290.89 o
   9  15  21        275.13        439.68       345.21 o
   0  16  21        862.24        804.37       284.96 o
   1  16  21        490.19        665.52       206.92 o
   2  16  21        110.30         16.35       234.20 o
   3  16  21       1647.02       1290.77       210.38 o
   4  16  21          6.45        113.40       185.52 o
   5  16  21        986.53       1039.00       214.09 o
   6  16  21        131.40        241.46       243.38 o
   7  16  21        736.15        820.15       307.56 o
   8  16  21          7.31        -24.76       249.89 o
   1  17  21        340.08        419.27       218.92 o
   2  17  21         69.32        105.70       204.17 o
   3  17  21        881.36        945.36       214.87 o
   4  17  21         41.97       -200.15       216.15 o
   5  17  21        690.06        610.92       239.21 o
   6  17  21         23.40         95.34       308.82 o
   7  17  21        308.20         22.16       359.14 o
   0  18  21         56.34        100.09       351.29 o
   1  18  21         68.83        255.22       235.89 o
   2  18  21          2.24        187.38       242.29 o
   3  18  21        362.59        206.31       237.51 o
   4  18  21        177.98        247.24       286.69 o
   5  18  21       1359.95       1544.76       376.93 o
   6  18  21          1.15       -345.64       451.91 o
   1  19  21         62.51        -35.72       312.42 o
   2  19  21         32.50       -174.15       309.42 o
   3  19  21         39.03         16.16       466.21 o
   4  19  21          1.14        -24.01       457.21 o
   0  20  21        976.46        644.68       461.09 o
   1  20  21         20.54        -44.81       308.38 o
   0   0  22       1455.47       1613.83       476.98 o
   1   0  22        153.05        291.67       442.38 o
   2   0  22       1873.34       2583.74       597.73 o
   3   0  22        609.76        495.80       335.99 o
   4   0  22      14461.19      15073.73       397.01 o
   5   0  22        801.57        813.34       261.03 o
   6   0  22       4796.39       4738.78       461.98 o
   7   0  22      14728.93      15303.09       382.49 o
   8   0  22        134.69        400.32       301.29 o
   9   0  22        119.41        281.77       293.47 o
  10   0  22       1162.99       1545.04       404.43 o
  11   0  22        666.47        269.84       359.59 o
  12   0  22        679.35        610.06       288.62 o
  13   0  22       1316.87       1263.68       302.39 o
  14   0  22         47.58        -83.32       294.85 o
   1   1  22          4.43        204.70       227.99 o
   2   1  22        433.47        474.31       232.97 o
   3   1  22         30.84       -132.11       205.45 o
   4   1  22         24.24         -5.72       201.66 o
   5   1  22        655.17        753.97       197.47 o
   6   1  22        418.67        433.62       197.10 o
   7   1  22         85.97        244.38       377.56 o
   8   1  22        370.76        357.65       211.77 o
   9   1  22         13.04        249.90       223.69 o
  10   1  22       1519.55       1604.92       208.40 o
  11   1  22        275.39        324.44       210.05 o
  12   1  22          2.48        353.69       203.33 o
  13   1  22          0.00       -208.80       208.80 o
  14   1  22        136.32        -34.11       214.88 o
   0   2  22      50955.38      52341.86      5609.38 o
   1   2  22       2340.86       2939.07       263.18 o
   2   2  22       3878.99       4019.56       227.74 o
   3   2  22         21.96        455.52       291.59 o
   4   2  22       5852.12       6040.32       242.92 o
   5   2  22      13487.34      13819.62       742.99 o
   6   2  22       1608.31       1993.12       226.76 o
   7   2  22       6416.58       6673.73       227.18 o
   8   2  22       1410.60       1593.68       202.14 o
   9   2  22        186.91        294.08       206.22 o
  10   2  22        348.79        225.03       204.82 o
  11   2  22         62.70        254.66       207.30 o
  12   2  22          5.99        323.55       295.72 o
  13   2  22       2598.05       1787.69       410.89 o
  14   2  22          0.84        146.89       227.55 o
   1   3  22        612.37        719.77       209.96 o
   2   3  22       1002.34        984.66       211.16 o
   3   3  22       1214.29       1068.41       253.20 o
   4   3  22        307.92        499.22       219.78 o
   5   3  22       1619.19       1579.66       247.82 o
   6   3  22       2049.48       2574.46       527.73 o
   7   3  22        352.35        175.18       351.57 o
   8   3  22        226.94        335.82       259.71 o
   9   3  22         30.61         69.45       194.02 o
  10   3  22        255.79        138.18       189.32 o
  11   3  22        551.88        487.00       190.88 o
  12   3  22        829.08        588.92       190.01 o
  13   3  22          0.57        -89.57       186.54 o
  14   3  22        606.16        529.48       192.62 o
   0   4  22        667.97        832.00       335.77 o
   1   4  22          1.88        521.20       208.15 o
   2   4  22       5650.72       5928.81       245.36 o
   3   4  22       2046.26       2681.59       231.32 o
   4   4  22       2481.39       2750.20       231.76 o
   5   4  22       7073.87       7116.93       241.39 o
   6   4  22       1958.50       2162.99       257.92 o
   7   4  22       3544.48       4305.61       231.35 o
   8   4  22       4975.41       4772.75       410.63 o
   9   4  22        132.79        317.44       207.45 o
  10   4  22          1.24       -212.52       212.52 o
  11   4  22       1514.54       1237.48       218.00 o
  12   4  22         54.73         10.97       221.81 o
  13   4  22       2058.93       1887.05       251.29 o
  14   4  22         26.71        314.00       254.64 o
   1   5  22       2617.20       2812.61       370.02 o
   2   5  22       1123.16       1398.12       229.04 o
   3   5  22       1169.17       1312.85       233.75 o
   4   5  22        563.65        598.32       291.08 o
   5   5  22       1620.40       1784.86       224.58 o
   6   5  22       3764.15       4035.42       321.50 o
   7   5  22        421.16        541.31       216.85 o
   8   5  22         34.97        363.17       229.32 o
   9   5  22          0.94        416.83       210.10 o
  10   5  22        126.74        437.53       207.88 o
  11   5  22         26.21         65.68       210.47 o
  12   5  22       1344.54       1054.88       222.29 o
  13   5  22          6.89         59.84       210.00 o
   0   6  22       3118.80       2954.76       330.79 o
   1   6  22          2.01       -189.23       347.52 o
   2   6  22       3131.75       3224.31       292.25 o
   3   6  22        335.21        538.99       260.15 o
   4   6  22        195.64         87.33       253.10 o
   5   6  22        597.96       1125.80       214.87 o
   6   6  22       5150.95       5672.51       389.64 o
   7   6  22        741.20        669.47       215.33 o
   8   6  22       1103.73       1329.98       255.25 o
   9   6  22       3894.91       3712.73       481.06 o
  10   6  22       2341.80       2500.80       219.18 o
  11   6  22       2310.83       1979.89       221.10 o
  12   6  22          9.09         14.93       219.78 o
  13   6  22       1616.68       1420.24       228.11 o
   1   7  22       2281.90       2055.32       203.97 o
   2   7  22       2937.36       2972.40       265.07 o
   3   7  22       1217.18       1156.93       219.39 o
   4   7  22          1.83        164.44       216.78 o
   5   7  22       1606.53       1762.25       222.93 o
   6   7  22        379.97        213.63       418.41 o
   7   7  22        786.20        834.68       208.39 o
   8   7  22         16.51        267.28       233.82 o
   9   7  22         46.18        146.07       201.06 o
  10   7  22         77.20         66.97       218.07 o
  11   7  22          0.90        182.28       206.13 o
  12   7  22        205.82        155.13       224.83 o
  13   7  22          7.96        -93.43       219.83 o
   0   8  22       2555.27       2579.01       373.89 o
   1   8  22          6.19         55.69       217.15 o
   2   8  22        771.05        889.55       248.00 o
   3   8  22        332.46        297.02       241.11 o
   4   8  22       2684.12       2886.34       225.00 o
   5   8  22        514.61        322.12       316.76 o
   6   8  22        521.65       1169.96       264.15 o
   7   8  22        639.38        713.65       208.74 o
   8   8  22        283.24        572.77       228.89 o
   9   8  22        303.61        380.10       233.31 o
  10   8  22        755.57        684.52       280.72 o
  11   8  22       1013.06        921.83       219.88 o
  12   8  22         13.81        -25.45       207.45 o
  13   8  22        529.65        258.69       219.10 o
   1   9  22        101.89         -5.79       217.45 o
   2   9  22         25.47       -136.55       222.53 o
   3   9  22       2859.99       3161.67       309.12 o
   4   9  22        436.49        477.48       255.15 o
   5   9  22       3484.43       3041.90       259.07 o
   6   9  22          4.65         62.42       222.73 o
   7   9  22        168.32        228.57       240.34 o
   8   9  22          5.69        423.81       245.41 o
   9   9  22         13.78       -112.50       218.95 o
  10   9  22        200.29        -26.50       242.28 o
  11   9  22        215.96        175.14       237.40 o
  12   9  22        871.60        608.86       255.89 o
   0  10  22       7949.35       7802.90       411.84 o
   1  10  22       2547.03       2679.94       225.31 o
   2  10  22        736.46        805.72       209.43 o
   3  10  22         11.00       -188.73       247.59 o
   4  10  22        537.65        550.58       244.36 o
   5  10  22       1128.99       1328.61       218.78 o
   6  10  22       2478.22       2464.17       231.00 o
   7  10  22         89.34        142.76       221.76 o
   8  10  22         55.45       -104.39       244.71 o
   9  10  22         21.32         37.98       213.19 o
  10  10  22        128.31         34.33       214.82 o
  11  10  22        806.35        767.70       238.07 o
  12  10  22        421.86        424.39       221.91 o
   1  11  22         99.20        502.76       219.48 o
   2  11  22       1748.82       1659.87       232.25 o
   3  11  22       4875.52       5147.86       215.63 o
   4  11  22       1725.62       1890.56       216.31 o
   5  11  22        795.82        851.59       208.55 o
   6  11  22       1122.73       1230.39       264.40 o
   7  11  22         29.43       -167.74       204.41 o
   8  11  22        951.10        876.68       218.25 o
   9  11  22        621.68        406.17       215.35 o
  10  11  22       3656.35       3306.70       477.90 o
  11  11  22        105.80        175.96       242.70 o
   0  12  22       6105.33       6642.77       354.10 o
   1  12  22        295.18       -150.31       249.24 o
   2  12  22        165.59        308.78       205.04 o
   3  12  22        231.48        261.61       189.97 o
   4  12  22       9727.51       7720.87       776.87 o
   5  12  22          3.97        238.83       221.37 o
   6  12  22       1848.75       1954.07       210.78 o
   7  12  22        502.97        244.05       234.82 o
   8  12  22        706.15        532.23       279.90 o
   9  12  22        396.97        243.29       208.12 o
  10  12  22       1887.03       1671.55       221.56 o
  11  12  22        235.53        177.41       348.05 o
   1  13  22       2179.63       2138.72       275.28 o
   2  13  22         33.98        -62.91       202.61 o
   3  13  22       8588.40       8444.60       280.98 o
   4  13  22         11.89        145.55       202.48 o
   5  13  22         64.75        379.36       206.28 o
   6  13  22         33.83         37.37       210.18 o
   7  13  22        257.41         93.03       214.91 o
   8  13  22        650.60        641.92       213.90 o
   9  13  22        691.04        272.56       211.95 o
  10  13  22       1431.57       1081.00       250.81 o
   0  14  22        653.46        760.16       300.90 o
   1  14  22          0.04       -106.98       234.57 o
   2  14  22        646.65        813.32       209.81 o
   3  14  22        105.26         36.75       208.78 o
   4  14  22       2624.64       2156.55       239.02 o
   5  14  22       3125.98       3196.53       367.62 o
   6  14  22         13.69        310.24       209.97 o
   7  14  22         71.06        210.34       221.43 o
   8  14  22         64.64        179.05       222.01 o
   9  14  22         21.02        -62.84       308.17 o
  10  14  22          3.74        -36.80       310.71 o
   1  15  22        862.32        681.35       216.23 o
   2  15  22       2070.95       1917.49       218.32 o
   3  15  22       3422.27       2847.92       267.08 o
   4  15  22        980.47        995.67       195.70 o
   5  15  22       2550.31       2559.41       460.37 o
   6  15  22       1069.63        661.32       221.96 o
   7  15  22         98.42        130.92       295.03 o
   8  15  22       1281.50       1130.83       300.12 o
   9  15  22         64.17       -192.08       252.88 o
   0  16  22        339.34        690.75       287.17 o
   1  16  22        554.46        616.24       202.07 o
   2  16  22         16.99        394.11       294.57 o
   3  16  22        398.35        427.46       239.70 o
   4  16  22         39.90        170.49       187.00 o
   5  16  22        599.72        541.88       227.57 o
   6  16  22        118.75        252.99       210.51 o
   7  16  22        176.31        393.51       295.84 o
   8  16  22        671.09        512.99       256.07 o
   1  17  22        194.55        264.16       211.75 o
   2  17  22          1.37         11.26       207.39 o
   3  17  22       1852.20       1650.39       217.84 o
   4  17  22        690.47        400.03       236.86 o
   5  17  22       1943.56       1685.10       260.49 o
   6  17  22        650.57        166.07       301.23 o
   7  17  22        260.46        305.84       241.96 o
   0  18  22        351.73         26.20       582.02 o
   1  18  22         54.25        116.31       203.62 o
   2  18  22          2.90        -22.10       206.98 o
   3  18  22          0.52         27.19       241.48 o
   4  18  22          6.75       -202.94       262.89 o
   5  18  22         23.68        294.84       252.84 o
   1  19  22        969.55       1017.97       321.14 o
   2  19  22         23.96        386.63       314.05 o
   3  19  22        286.65        400.11       313.53 o
   1   1  23       5229.87       5572.90       266.80 o
   2   1  23       1471.54       1459.51       237.27 o
   3   1  23        611.89        782.63       203.64 o
   4   1  23       7684.72       7500.93       292.25 o
   5   1  23       1726.53       1614.83       290.62 o
   6   1  23       6511.26       6639.08       216.71 o
   7   1  23       2143.30       2420.16       202.31 o
   8   1  23         32.18        -40.05       231.76 o
   9   1  23        822.17        444.95       216.88 o
  10   1  23       2544.42       2744.90       219.03 o
  11   1  23       1120.39        719.32       209.04 o
  12   1  23        263.40        464.78       202.08 o
  13   1  23        233.91        399.66       207.83 o
  14   1  23       1464.45        982.15       231.21 o
   0   2  23       2143.56       2734.89       405.33 o
   1   2  23       3378.25       3600.77       246.65 o
   2   2  23         34.89        225.25       206.92 o
   3   2  23       1372.58       1320.30       284.10 o
   4   2  23       4785.51       4421.22       898.11 o
   5   2  23        707.36        812.18       236.86 o
   6   2  23        766.42        689.32       257.44 o
   7   2  23        451.09        514.33       237.07 o
   8   2  23         67.11        202.77       207.15 o
   9   2  23       4911.88       4579.50       204.25 o
  10   2  23        197.88        106.08       188.55 o
  11   2  23       1849.95       1800.95       212.17 o
  12   2  23        470.99        392.53       218.23 o
  13   2  23          1.56        180.64       244.35 o
   1   3  23         28.54        153.28       277.58 o
   2   3  23        601.56        450.83       205.51 o
   3   3  23        611.56        743.45       221.04 o
   4   3  23       2861.16       3034.36       245.65 o
   5   3  23       3508.52       3385.12       270.08 o
   6   3  23       2383.76       2771.77       224.99 o
   7   3  23        833.33        628.25       236.78 o
   8   3  23       3274.84       3286.91       256.97 o
   9   3  23        431.15        413.36       229.50 o
  10   3  23       2110.99       2208.76       206.56 o
  11   3  23         68.61        311.56       208.25 o
  12   3  23        500.80        513.85       206.91 o
  13   3  23        198.09       -138.45       197.24 o
   0   4  23        159.95        206.84       505.23 o
   1   4  23        977.31       1172.80       272.25 o
   2   4  23       1867.27       1819.96       232.18 o
   3   4  23       1107.89       1133.21       226.49 o
   4   4  23       1250.32       1394.25       221.27 o
   5   4  23       1544.71       1866.52       223.55 o
   6   4  23        146.19        333.69       226.91 o
   7   4  23        309.55        625.53       213.72 o
   8   4  23         11.09        113.00       220.83 o
   9   4  23       1636.62       1723.43       236.05 o
  10   4  23         12.79        132.94       232.53 o
  11   4  23        197.04        463.63       241.19 o
  12   4  23        154.59        -34.89       214.00 o
  13   4  23        244.38        251.60       215.07 o
   1   5  23       1604.36       1879.09       227.18 o
   2   5  23       1949.74       2086.71       235.89 o
   3   5  23        553.36       1028.82       226.02 o
   4   5  23       3915.12       4066.48       287.05 o
   5   5  23         49.97         78.38       219.34 o
   6   5  23       3696.22       3776.74       229.58 o
   7   5  23        821.83       1213.94       253.09 o
   8   5  23       3733.44       3782.81       225.02 o
   9   5  23       2889.06       3058.51       219.04 o
  10   5  23       1395.52       1302.49       291.69 o
  11   5  23          6.65       -209.00       209.00 o
  12   5  23       2620.36       2270.05       225.18 o
  13   5  23        163.11       -141.68       220.49 o
   0   6  23       2683.11       2908.26       282.19 o
   1   6  23        348.01        669.54       222.93 o
   2   6  23       1294.87       2046.72       227.39 o
   3   6  23          0.67       -220.69       220.69 o
   4   6  23       4913.77       5223.01       333.89 o
   5   6  23         38.12         86.92       219.69 o
   6   6  23        117.46        211.41       216.04 o
   7   6  23       3311.97       3897.39       228.64 o
   8   6  23        226.09        431.04       207.01 o
   9   6  23         85.06        -39.47       287.62 o
  10   6  23        682.96        538.55       228.23 o
  11   6  23          0.23       -177.19       229.59 o
  12   6  23          6.81        356.46       221.15 o
  13   6  23        206.95        103.70       216.41 o
   1   7  23          1.18       -198.32       198.32 o
   2   7  23         31.50        209.09       227.81 o
   3   7  23        303.87        -42.17       257.38 o
   4   7  23        853.51       1034.01       218.20 o
   5   7  23        170.37         91.50       215.16 o
   6   7  23        383.26        529.17       247.78 o
   7   7  23        170.94        299.75       227.74 o
   8   7  23        133.07        423.74       255.17 o
   9   7  23        799.06        709.93       210.63 o
  10   7  23       1728.84       1685.96       315.95 o
  11   7  23         48.82        274.49       221.19 o
  12   7  23       3036.08       3055.12       483.22 o
  13   7  23         19.09         26.69       216.19 o
   0   8  23       3591.03       4047.21       315.73 o
   1   8  23       2999.90       2957.24       202.82 o
   2   8  23       1892.69       2189.45       244.36 o
   3   8  23       1239.04       1277.94       219.95 o
   4   8  23         46.36        -54.21       215.23 o
   5   8  23          0.97        227.56       205.43 o
   6   8  23         87.55        233.47       267.77 o
   7   8  23         12.11        243.39       201.22 o
   8   8  23        233.71        378.67       228.65 o
   9   8  23         18.74       -100.99       209.39 o
  10   8  23        390.19        330.34       208.13 o
  11   8  23        382.61         28.32       227.49 o
  12   8  23        467.13         28.32       217.75 o
   1   9  23        559.58        493.77       211.07 o
   2   9  23        380.02        797.50       216.64 o
   3   9  23        633.76        896.81       219.41 o
   4   9  23        512.95        565.31       230.52 o
   5   9  23         31.81       -113.20       244.26 o
   6   9  23       2514.70       2673.34       228.09 o
   7   9  23        134.60       -140.39       215.41 o
   8   9  23       1998.03       2086.90       211.02 o
   9   9  23        203.92         26.34       239.34 o
  10   9  23       1982.71       1967.10       255.21 o
  11   9  23        172.15        142.14       262.40 o
  12   9  23        792.74        295.18       249.15 o
   0  10  23       2871.64       3270.14       464.45 o
   1  10  23        985.34        871.52       221.56 o
   2  10  23       1758.91       1695.35       201.47 o
   3  10  23         20.64        351.82       261.33 o
   4  10  23       2245.02       2153.68       249.90 o
   5  10  23         65.44        129.81       208.37 o
   6  10  23        754.25        834.82       223.92 o
   7  10  23        795.01        761.12       238.42 o
   8  10  23        753.70        720.54       210.93 o
   9  10  23        161.78        281.41       226.72 o
  10  10  23        101.52        129.08       205.68 o
  11  10  23          2.90        191.04       222.33 o
  12  10  23          2.11        267.95       248.05 o
   1  11  23        115.85        219.51       206.20 o
   2  11  23        333.41       -213.83       213.83 o
   3  11  23       4552.24       4268.28       229.68 o
   4  11  23        428.43        359.59       217.95 o
   5  11  23         20.47         -1.32       207.49 o
   6  11  23       1441.97       1298.68       242.13 o
   7  11  23          0.10        348.80       204.51 o
   8  11  23        241.02        -10.21       277.60 o
   9  11  23        624.22        686.27       265.86 o
  10  11  23        620.23        182.67       249.51 o
  11  11  23          0.81       -195.05       267.54 o
   0  12  23        319.67        359.58       359.65 o
   1  12  23        586.93        578.40       203.53 o
   2  12  23       1516.48       1050.56       215.84 o
   3  12  23        124.53        436.24       185.80 o
   4  12  23       5593.39       5302.37       236.75 o
   5  12  23        329.82        562.29       239.85 o
   6  12  23       2639.94       2643.58       217.87 o
   7  12  23         17.19         46.90       242.87 o
   8  12  23        294.97        512.50       221.47 o
   9  12  23        190.83        208.79       206.08 o
  10  12  23        136.14        211.67       213.82 o
   1  13  23         81.78         51.93       240.69 o
   2  13  23       2090.27       2010.91       217.07 o
   3  13  23       3216.62       2643.67       211.42 o
   4  13  23          5.65         50.58       211.99 o
   5  13  23        549.94        230.78       214.77 o
   6  13  23       2357.25       2520.80       513.44 o
   7  13  23        304.38        295.81       209.27 o
   8  13  23        513.38        447.85       202.42 o
   9  13  23         47.06       -301.48       301.48 o
  10  13  23         55.41         14.23       242.06 o
   0  14  23       3593.57       4090.72       314.40 o
   1  14  23        139.01        119.72       217.61 o
   2  14  23       1629.66       1520.19       252.96 o
   3  14  23        346.28        704.96       201.19 o
   4  14  23       9476.11       9406.52       344.74 o
   5  14  23       1671.15       1368.74       247.57 o
   6  14  23       1306.59        846.71       215.67 o
   7  14  23        430.83        459.67       216.28 o
   8  14  23        454.77        542.62       246.86 o
   9  14  23        102.08        238.62       245.67 o
   1  15  23          2.65          0.49       201.79 o
   2  15  23        613.66        395.77       207.41 o
   3  15  23        123.12         71.33       202.86 o
   4  15  23         72.82         59.81       179.03 o
   5  15  23        204.20        165.55       300.83 o
   6  15  23        105.21         96.81       246.19 o
   7  15  23        772.76        390.35       246.55 o
   8  15  23        188.56        302.33       214.20 o
   0  16  23       3586.38       3325.28       339.95 o
   1  16  23        306.88        298.67       207.34 o
   2  16  23       5052.06       5100.68       273.46 o
   3  16  23        241.68        105.02       260.50 o
   4  16  23       2641.61       2283.61       440.51 o
   5  16  23        129.48        364.17       232.17 o
   6  16  23       1609.27       1402.46       257.56 o
   7  16  23         80.56        -22.00       270.17 o
   1  17  23          9.94        167.54       205.28 o
   2  17  23         22.83        284.88       204.53 o
   3  17  23        763.04        601.81       211.53 o
   4  17  23        765.21        458.47       224.71 o
   5  17  23        196.21         61.35       214.57 o
   6  17  23        144.80        205.34       501.70 o
   0  18  23        775.45        329.49       454.39 o
   1  18  23         49.24        -18.72       213.05 o
   2  18  23        939.74        607.18       222.83 o
   3  18  23          4.14        230.91       206.83 o
   4  18  23       1016.41        965.78       237.78 o
   5  18  23         97.99          3.97       250.56 o
   1  19  23         51.15        254.42       326.16 o
   2  19  23        105.37       -140.20       316.93 o
   0   0  24      21473.49      23646.05       765.08 o
   1   0  24        219.72        595.03       328.27 o
   2   0  24      11396.54      11377.12       377.69 o
   3   0  24       2770.63       2948.27       589.61 o
   4   0  24       1111.90        931.58       365.33 o
   5   0  24       1171.42       1306.28       306.48 o
   6   0  24       1897.43       2009.22       265.95 o
   7   0  24       4014.62       4503.76       333.30 o
   8   0  24         71.47        503.89       426.40 o
   9   0  24         69.58        -58.32       493.40 o
  10   0  24        750.54        657.04       295.26 o
  11   0  24       1389.18       1173.30       298.12 o
  12   0  24       1238.56       1126.31       507.70 o
  13   0  24         71.61       -311.84       311.84 o
   1   1  24        230.91        281.84       252.52 o
   2   1  24        448.33        403.73       231.06 o
   3   1  24        664.09        869.25       233.50 o
   4   1  24       1830.28       2097.00       206.41 o
   5   1  24       1610.36       1657.08       200.45 o
   6   1  24          7.69         55.10       201.06 o
   7   1  24          0.23        306.49       205.80 o
   8   1  24         46.40        215.75       193.59 o
   9   1  24        186.98        322.94       211.41 o
  10   1  24        893.43        646.12       213.83 o
  11   1  24         12.92        357.83       200.54 o
  12   1  24       1117.40        843.78       207.75 o
  13   1  24          7.57        226.53       222.58 o
   0   2  24      27919.51      23874.43     12236.46 o
   1   2  24       2715.86       2831.90       238.08 o
   2   2  24       5452.99       5795.32       246.69 o
   3   2  24        599.89        619.20       233.33 o
   4   2  24       2722.60       3042.54       229.12 o
   5   2  24       7867.33       8043.71       249.49 o
   6   2  24       2214.55       1988.06       263.64 o
   7   2  24       2933.97       3305.08       412.29 o
   8   2  24       2184.87       2001.31       198.80 o
   9   2  24        309.36        533.56       201.51 o
  10   2  24        669.19        783.45       190.76 o
  11   2  24       1206.26       1316.58       188.14 o
  12   2  24       1172.71        717.58       197.42 o
  13   2  24        557.11        279.22       220.24 o
   1   3  24        171.94        539.62       227.00 o
   2   3  24       3526.77       3115.92       378.21 o
   3   3  24       3879.78       4054.85       348.76 o
   4   3  24          4.59         27.06       230.40 o
   5   3  24       3080.68       3377.31       348.14 o
   6   3  24       3361.96       3338.49       269.47 o
   7   3  24       1989.26       1878.99       369.56 o
   8   3  24        509.47        582.04       249.70 o
   9   3  24          3.55       -200.60       216.74 o
  10   3  24        391.33        646.52       224.80 o
  11   3  24        228.03        110.07       190.58 o
  12   3  24         60.82        226.43       198.44 o
  13   3  24         62.93        264.36       215.52 o
   0   4  24       2332.44       2424.23       344.76 o
   1   4  24        304.31        301.80       207.38 o
   2   4  24       7083.67       7618.28       261.96 o
   3   4  24        199.50        487.95       218.98 o
   4   4  24       7942.59       8067.13       244.19 o
   5   4  24       4424.88       4519.75       428.39 o
   6   4  24       4202.15       4590.64       234.17 o
   7   4  24       3695.10       3895.31       257.29 o
   8   4  24       1980.82       1896.68       223.96 o
   9   4  24        228.72         90.51       249.91 o
  10   4  24        298.48        367.62       209.25 o
  11   4  24       1007.84        917.14       252.10 o
  12   4  24          0.73         42.35       223.50 o
  13   4  24        374.77        520.15       214.66 o
   1   5  24         25.48        107.42       216.02 o
   2   5  24         92.46        131.76       234.25 o
   3   5  24        898.49        830.30       238.95 o
   4   5  24       1386.54       1653.96       234.50 o
   5   5  24        417.35        381.02       216.76 o
   6   5  24        414.46        536.26       219.59 o
   7   5  24         54.07         73.31       237.90 o
   8   5  24        695.78        862.67       211.43 o
   9   5  24        347.58        658.29       206.01 o
  10   5  24        316.13          2.91       211.42 o
  11   5  24        560.39        588.45       216.27 o
  12   5  24         86.09       -101.51       219.61 o
  13   5  24         11.69         28.10       218.37 o
   0   6  24       7469.12       7973.62       315.70 o
   1   6  24          2.88       -107.51       223.57 o
   2   6  24       2003.62       2385.13       329.45 o
   3   6  24        273.01        229.05       217.12 o
   4   6  24       3482.11       3493.46       230.78 o
   5   6  24         21.78        185.45       298.83 o
   6   6  24       2003.17       2429.23       219.95 o
   7   6  24         68.36        134.21       198.05 o
   8   6  24       1368.39       1059.42       215.22 o
   9   6  24        519.20        494.60       210.92 o
  10   6  24         62.83        308.48       212.54 o
  11   6  24         59.32         27.28       210.58 o
  12   6  24        337.00        -10.47       216.17 o
   1   7  24         63.78        188.32       205.22 o
   2   7  24        694.01        925.38       221.02 o
   3   7  24        345.38        558.30       233.92 o
   4   7  24        258.78        214.56       293.07 o
   5   7  24        854.03        949.10       216.69 o
   6   7  24        186.50        464.79       213.91 o
   7   7  24       2896.36       2511.88       259.86 o
   8   7  24       4450.39       4057.09       508.02 o
   9   7  24        247.15        292.60       205.11 o
  10   7  24       1151.93        981.11       251.77 o
  11   7  24         17.33        -80.51       222.27 o
  12   7  24        245.45       -156.47       371.49 o
   0   8  24        690.70        707.55       299.89 o
   1   8  24          0.19       -123.74       197.76 o
   2   8  24        579.91        491.66       325.78 o
   3   8  24       1056.42       1154.08       220.77 o
   4   8  24        615.75       1098.20       260.25 o
   5   8  24        401.84        739.63       240.02 o
   6   8  24        976.47       1019.51       261.35 o
   7   8  24         13.53         84.27       200.75 o
   8   8  24        695.31        642.65       247.84 o
   9   8  24        174.05        175.03       202.76 o
  10   8  24        352.81        137.74       212.29 o
  11   8  24        196.05        392.34       224.39 o
  12   8  24         70.85        385.83       215.37 o
   1   9  24       1735.98       1880.23       217.33 o
   2   9  24       2180.21       2681.14       231.76 o
   3   9  24       2052.87       2406.61       226.48 o
   4   9  24        110.39        257.09       242.02 o
   5   9  24        429.27        482.09       242.13 o
   6   9  24        471.56        396.49       240.95 o
   7   9  24        364.89        219.83       200.78 o
   8   9  24       2153.66       2086.26       252.52 o
   9   9  24        102.61       -184.15       236.59 o
  10   9  24        721.39        691.85       209.36 o
  11   9  24         78.25        -48.58       213.76 o
  12   9  24        551.14        323.90       219.31 o
   0  10  24      13176.55      12418.60       433.14 o
   1  10  24         89.41         40.07       230.54 o
   2  10  24        136.24         -6.48       212.49 o
   3  10  24        570.72        658.58       234.52 o
   4  10  24          9.71         81.09       244.16 o
   5  10  24        334.99        420.02       234.23 o
   6  10  24       2285.88       2388.81       216.02 o
   7  10  24         22.81         -9.81       244.40 o
   8  10  24        161.48        391.93       206.94 o
   9  10  24          2.16        274.09       207.24 o
  10  10  24        241.37        272.63       241.91 o
  11  10  24        205.85        290.97       266.22 o
   1  11  24       2039.25       1915.96       215.06 o
   2  11  24       2249.63       2244.38       193.67 o
   3  11  24        176.42        169.75       212.02 o
   4  11  24        922.01       1091.22       212.70 o
   5  11  24        293.61        424.56       216.02 o
   6  11  24       1367.41       1271.62       273.59 o
   7  11  24        102.66        201.97       203.55 o
   8  11  24       1934.47       1841.57       254.09 o
   9  11  24         39.30        -13.69       203.13 o
  10  11  24        913.58        581.70       213.02 o
  11  11  24         26.35        -15.78       208.61 o
   0  12  24      14793.49      14306.66       439.73 o
   1  12  24         42.09         -0.80       219.95 o
   2  12  24        652.75        482.73       204.32 o
   3  12  24        533.54        409.06       188.12 o
   4  12  24        767.47        723.41       208.90 o
   5  12  24        127.37        319.35       298.36 o
   6  12  24        176.51         99.85       234.03 o
   7  12  24        401.75        608.89       240.50 o
   8  12  24        323.59        131.35       211.64 o
   9  12  24          9.64        125.90       203.61 o
  10  12  24        175.42        249.95       245.86 o
   1  13  24       1291.85       1087.14       222.99 o
   2  13  24         11.51       -125.22       350.15 o
   3  13  24       1003.82       1211.15       238.89 o
   4  13  24       2639.35       2403.12       215.81 o
   5  13  24        289.58        483.29       208.02 o
   6  13  24        680.99        668.34       246.36 o
   7  13  24       2179.18       1923.36       221.65 o
   8  13  24         16.04        -64.69       245.34 o
   9  13  24        565.21        509.79       251.00 o
   0  14  24         62.47        163.25       325.70 o
   1  14  24         23.86        284.97       217.50 o
   2  14  24       1509.53       1236.36       232.79 o
   3  14  24        136.62       -155.91       190.13 o
   4  14  24         85.56        175.73       204.68 o
   5  14  24          4.69        260.41       241.20 o
   6  14  24         14.38          7.63       206.94 o
   7  14  24          1.31        -68.65       251.13 o
   8  14  24          0.73        254.17       246.04 o
   9  14  24         61.26       -185.82       230.60 o
   1  15  24        664.02        732.04       202.93 o
   2  15  24        107.99        261.35       204.31 o
   3  15  24        749.77        716.30       202.40 o
   4  15  24        444.68        404.45       214.08 o
   5  15  24       1051.72        614.51       230.08 o
   6  15  24        202.90        319.36       235.12 o
   7  15  24        224.09        130.57       279.11 o
   8  15  24        270.42         46.20       231.54 o
   0  16  24          0.43        -64.45       390.48 o
   1  16  24        229.72        303.96       206.24 o
   2  16  24        288.16        158.92       206.78 o
   3  16  24         25.85         81.40       187.46 o
   4  16  24        387.76        164.93       245.11 o
   5  16  24         38.64       -151.07       230.34 o
   6  16  24        293.45        421.68       268.78 o
   7  16  24          0.10         -7.34       235.06 o
   1  17  24        867.42        441.57       216.58 o
   2  17  24        278.98        470.81       211.34 o
   3  17  24       1401.23        729.39       224.50 o
   4  17  24        169.64        223.77       190.26 o
   5  17  24        239.31        469.68       255.75 o
   0  18  24        163.00        115.28       301.66 o
   1  18  24        169.07        287.57       208.66 o
   2  18  24         71.29         78.11       213.66 o
   3  18  24        112.95        127.87       213.67 o
   1   1  25      10539.46      11482.17       261.79 o
   2   1  25         10.28        215.86       220.35 o
   3   1  25       7237.77       7652.23       250.44 o
   4   1  25        378.86        585.96       207.37 o
   5   1  25      10073.14      10149.72      1102.64 o
   6   1  25        281.24        264.50       235.74 o
   7   1  25       1097.23       1134.00       279.59 o
   8   1  25       2718.70       2683.67       232.02 o
   9   1  25        801.17        895.50       191.65 o
  10   1  25         86.48       -192.68       207.29 o
  11   1  25          9.31          4.29       204.15 o
  12   1  25        116.63         89.54       219.96 o
  13   1  25        306.23        337.35       241.04 o
   0   2  25       2076.24       2141.18       413.43 o
   1   2  25       1872.04       2099.26       238.51 o
   2   2  25         84.93        206.92       222.71 o
   3   2  25        583.08        951.39       236.51 o
   4   2  25        346.98        359.25       208.61 o
   5   2  25       3665.80       4112.91       229.93 o
   6   2  25        443.94        447.74       228.96 o
   7   2  25       2099.66       2289.57       225.58 o
   8   2  25       1448.50       1152.62       249.32 o
   9   2  25         77.30       -189.50       190.70 o
  10   2  25         92.74        117.12       186.07 o
  11   2  25         10.84        -91.15       202.44 o
  12   2  25         94.69        284.52       206.82 o
  13   2  25        350.86        -69.22       219.83 o
   1   3  25      21651.47      23924.21       303.58 o
   2   3  25       3573.62       3997.99       357.75 o
   3   3  25       3940.68       3862.96       633.26 o
   4   3  25        640.78        141.92       314.47 o
   5   3  25        649.37       1042.62       224.29 o
   6   3  25       2248.68       2312.90       241.82 o
   7   3  25        164.91        481.67       220.34 o
   8   3  25       2341.45       2257.06       220.54 o
   9   3  25       1435.14       1719.89       227.99 o
  10   3  25        728.84        550.12       212.13 o
  11   3  25         17.57        302.48       208.93 o
  12   3  25        474.18        275.59       240.66 o
  13   3  25       1167.99        958.80       228.72 o
   0   4  25        370.17       1236.56       369.17 o
   1   4  25        208.82        456.67       228.61 o
   2   4  25          3.64        181.43       198.68 o
   3   4  25        392.98        545.58       230.38 o
   4   4  25        301.47         38.37       216.38 o
   5   4  25       2609.80       2839.55       226.00 o
   6   4  25          8.21       -216.51       216.51 o
   7   4  25        187.52        103.89       216.06 o
   8   4  25        248.64        495.55       223.66 o
   9   4  25       1298.66       1514.22       217.89 o
  10   4  25        560.29        621.65       210.38 o
  11   4  25        474.01        750.84       216.63 o
  12   4  25          3.57       -108.18       211.63 o
   1   5  25      10498.19      10562.13       340.27 o
   2   5  25          0.42        105.21       255.92 o
   3   5  25       9508.11       9642.68       465.06 o
   4   5  25        702.82        571.82       220.55 o
   5   5  25         22.92        108.29       220.37 o
   6   5  25        383.68        537.42       213.08 o
   7   5  25       3221.99       3716.88       259.39 o
   8   5  25       4288.17       4371.62       223.92 o
   9   5  25       3723.96       3518.20       257.60 o
  10   5  25        252.31        176.87       206.62 o
  11   5  25        552.64        408.33       234.38 o
  12   5  25        350.57        231.85       214.05 o
   0   6  25        408.88        343.56       261.24 o
   1   6  25        138.26       -176.42       194.20 o
   2   6  25       1354.15       1551.86       264.16 o
   3   6  25         68.75        182.48       256.61 o
   4   6  25       1403.16       1590.15       277.45 o
   5   6  25        101.72         18.11       229.20 o
   6   6  25       4150.32       3472.78       276.22 o
   7   6  25        772.98        209.38       272.38 o
   8   6  25       1000.18        808.05       297.97 o
   9   6  25         26.14        408.04       204.65 o
  10   6  25        197.91        101.68       214.07 o
  11   6  25        826.73        780.77       220.70 o
  12   6  25          4.43         34.56       215.17 o
   1   7  25       4526.46       4657.76       248.08 o
   2   7  25        668.26        513.17       237.81 o
   3   7  25        856.21        586.20       236.07 o
   4   7  25       1827.54       1824.44       240.07 o
   5   7  25       2150.90       2211.98       237.65 o
   6   7  25       1976.83       2239.86       228.39 o
   7   7  25        840.65        753.48       532.10 o
   8   7  25        476.53        417.50       208.56 o
   9   7  25        285.00        123.94       247.01 o
  10   7  25         63.57        109.07       246.78 o
  11   7  25        712.46        534.26       214.68 o
  12   7  25        175.66        289.09       213.29 o
   0   8  25         33.31       -127.32       413.78 o
   1   8  25        649.97        852.27       215.89 o
   2   8  25        463.27        620.88       259.23 o
   3   8  25       4264.88       4467.18       235.91 o
   4   8  25        957.10       1221.33       212.64 o
   5   8  25       3238.79       3216.45       266.42 o
   6   8  25        313.50        232.11       222.81 o
   7   8  25       2517.90       2826.14       250.31 o
   8   8  25         23.59         80.70       305.45 o
   9   8  25       4536.78       4371.72       257.40 o
  10   8  25         27.41         16.41       240.40 o
  11   8  25        158.16        241.22       203.21 o
   1   9  25       6657.27       6835.33       224.00 o
   2   9  25        962.73       1225.55       266.85 o
   3   9  25        777.56       1136.77       219.52 o
   4   9  25        136.70       -102.31       210.19 o
   5   9  25        405.10        626.88       217.84 o
   6   9  25          1.12        330.90       240.43 o
   7   9  25       2298.11       1857.46       304.79 o
   8   9  25          2.43         -0.27       242.06 o
   9   9  25         48.25         -2.13       217.89 o
  10   9  25          3.22        -18.60       209.15 o
  11   9  25         59.54        244.06       216.22 o
   0  10  25        244.92        365.82       278.96 o
   1  10  25       1540.77       1212.38       193.20 o
   2  10  25       1213.22       1014.53       194.98 o
   3  10  25          9.96         98.32       267.03 o
   4  10  25        116.19        -34.65       211.78 o
   5  10  25        800.80        739.98       240.94 o
   6  10  25         33.65        -50.73       221.52 o
   7  10  25        304.95        591.35       227.96 o
   8  10  25        259.57        304.21       229.22 o
   9  10  25        119.65        121.39       246.75 o
  10  10  25        110.64        223.60       239.40 o
  11  10  25        485.44        311.32       255.03 o
   1  11  25       1471.58       1089.01       205.49 o
   2  11  25        232.21        426.87       197.31 o
   3  11  25          8.55        -38.02       269.08 o
   4  11  25          1.51         25.49       242.00 o
   5  11  25       1496.98       1446.68       224.70 o
   6  11  25          9.08        237.90       209.75 o
   7  11  25         32.49         30.14       236.64 o
   8  11  25        147.50        136.80       258.41 o
   9  11  25         62.36        365.85       201.71 o
  10  11  25          5.96        197.26       208.75 o
   0  12  25       7627.87       6977.06       338.49 o
   1  12  25         32.24       -109.46       206.31 o
   2  12  25       2089.65       1888.20       197.99 o
   3  12  25        485.65        608.17       234.37 o
   4  12  25       2771.94       2699.18       331.19 o
   5  12  25       2458.00       2518.17       356.15 o
   6  12  25        111.30        -93.91       205.70 o
   7  12  25        973.13       1159.86       228.79 o
   8  12  25         13.93        -18.95       203.95 o
   9  12  25       1138.67        998.65       257.46 o
  10  12  25         27.40         29.13       245.87 o
   1  13  25         60.87       -193.16       212.99 o
   2  13  25         33.22         22.00       208.93 o
   3  13  25       1499.10        897.86       212.20 o
   4  13  25         66.00        147.41       260.57 o
   5  13  25        383.87        481.37       208.06 o
   6  13  25         84.95        274.69       206.79 o
   7  13  25        130.76        268.73       208.78 o
   8  13  25          2.66       -228.16       244.81 o
   9  13  25        199.63         -0.16       210.32 o
   0  14  25         85.85        482.95       287.29 o
   1  14  25       1301.92        937.82       206.06 o
   2  14  25        595.23        601.24       220.61 o
   3  14  25         30.56         25.54       187.96 o
   4  14  25         93.49        184.77       198.88 o
   5  14  25         50.81         61.50       241.97 o
   6  14  25          4.83        357.59       226.67 o
   7  14  25       2411.60       1750.63       265.28 o
   8  14  25         50.83        108.81       212.17 o
   1  15  25        596.05        694.34       212.45 o
   2  15  25        856.99        658.71       246.14 o
   3  15  25         73.45         94.03       225.65 o
   4  15  25        260.39        609.69       242.77 o
   5  15  25       1048.80        821.24       224.62 o
   6  15  25         62.33        130.45       294.71 o
   7  15  25         23.34        -83.84       254.96 o
   0  16  25        856.72        675.22       295.34 o
   1  16  25        226.54        151.38       226.26 o
   2  16  25         52.40          1.34       205.15 o
   3  16  25         33.48        216.23       183.13 o
   4  16  25         14.27       -166.18       243.25 o
   5  16  25         32.92        379.75       227.64 o
   6  16  25         30.24        297.47       208.81 o
   1  17  25        260.33        203.47       250.94 o
   2  17  25          4.18        113.44       226.72 o
   3  17  25         45.17         82.28       192.06 o
   4  17  25          7.07        310.61       202.70 o
[truncated: 546,781 more chars]
