# Supplementary material
Source: MDPI journal article supplement (https://www.mdpi.com/2073-4352/13/4/569)
Supplement: s1 [file s1 › C51H47N9O14Zn_Platon_out.chk]

#===============================================================================
# PLATON/CHECK-(260223) versus check.def version 221222, Entry: C51H47N9O14Zn
# Data: hb-znphenl8.cif - Type: CIF18            Bond Precision   C-C = 0.0064 A
# Refl: hb-znphenl8.fcf - Type: LIST4                               Temp = 223 K
# Audit:SHELXL-2018/3
# Refin:SHELXL-2018/3 (SHELDRICK, 2018)
# X-ray MoKa              R(int) = 0.118,  wR2/R(int) =  1.0,  Nref/Npar =  11.9
# Cell  14.6426(7) 20.0946(13)   32.345(2)           90           90          90
# Wavelength 0.71073  Volume Reported      9517.0(10) Calculated      9517.1(10)
# SpaceGroup from Symmetry P b c a      Hall: -P 2ac 2ab            orthorhombic
#                 Reported P b c a            -P 2ac 2ab            orthorhombic
# MoietyFormula C36 H24 N6 Zn, C15 H13 N3 O9, 5(H2 O)
#      Reported C36 H24 N6 Zn, C15 H13 N3 O9, 5(H2 O)
#    SumFormula C51 H47 N9 O14 Zn
#      Reported C51 H47 N9 O14 Zn
# Mr        =   1075.37[Calc],   1075.34[Rep]       Volume/NonHatoms = 16 Ang**3
# Dx,gcm-3  =     1.501[Calc],     1.501[Rep]
# Z         =         8[Calc],         8[Rep]
# Mu (mm-1) =     0.597[Calc],     0.597[Rep]  Xtal Size =  0.170x0.290x0.450 mm
# F000      =    4464.0[Calc],    4464.0[Rep]  or F000' =   4468.35[Calc]
# Reported   T Limits: Tmin=0.804              Tmax=0.916  AbsCorr = NUMERICAL
# Calculated T Limits: Tmin=0.812 Tmin'=0.764  Tmax=0.903
# Measured   HKL: Reported  28115, Embedded  28115, <Mult>  0.0
# Reported   Hmax= 17, Kmax= 23, Lmax= 38, Nref=   8439        , Th(max)= 25.100
# Obs in FCF Hmax= 17, Kmax= 23, Lmax= 38, Nref=   8439[  8439], Th(max)= 25.100
# Calculated Hmax= 17, Kmax= 23, Lmax= 38, Nref=   8478        , Ratio  =  0.995
# Reported   Rho(min) = -0.58, Rho(max) = 0.28 e/Ang**3 (From CIF)
# Calculated Rho(min) = -0.43, Rho(max) = 0.26 e/Ang**3 (From CIF+FCF data)
# w=1/[\s^2^(Fo^2^)+(0.0400P)^2^], P=(Fo^2^+2Fc^2^)/3
# R= 0.0537(  4396), wR2= 0.1163(  8439), S = 0.908     (From CIF+FCF data)
# R= 0.0536(  4396), wR2= 0.1162(  8439), S = 0.908     (From FCF data only)
# R= 0.0536(  4396), wR2= 0.1162(  8439), S = 0.908, Npar=  709
#===============================================================================
# For Documentation:http://www.platonsoft.nl/CIF-VALIDATION.pdf
#===============================================================================
#                                                                              *
#===============================================================================
#>>> The Following Improvement and Query ALERTS were generated - (Acta-Mode) <<<
#===============================================================================
     Format: alert-number_ALERT_alert-type_alert-level text

355_ALERT_3_A Long   O-H (X0.82,N0.98A)  O9       - H9       .       1.21 Ang.
#===============================================================================
242_ALERT_2_C Low    'MainMol' Ueq as Compared to Neighbors of        C12 Check
341_ALERT_3_C Low Bond Precision on  C-C Bonds ...............     0.0064 Ang.
906_ALERT_3_C Large K Value in the Analysis of Variance ......     10.662 Check
906_ALERT_3_C Large K Value in the Analysis of Variance ......      2.508 Check
911_ALERT_3_C Missing FCF Refl Between Thmin & STh/L=    0.597         38 Report
#===============================================================================
002_ALERT_2_G Number of Distance or Angle Restraints on AtSite          7 Note
007_ALERT_5_G Number of Unrefined Donor-H Atoms ..............          3 Report
069_ALERT_1_G Atom Label Without Numerical Part ..............         Zn Do !
172_ALERT_4_G The CIF-Embedded .res File Contains DFIX Records          4 Report
480_ALERT_4_G Long H...A H-Bond Reported H29      ..O6       .       2.64 Ang.
480_ALERT_4_G Long H...A H-Bond Reported H40      ..N4       .       2.67 Ang.
484_ALERT_4_G Round D-H..A Angle Rep for N1       ..O7       .        150 Degree
484_ALERT_4_G Round D-H..A Angle Rep for N2       ..O3       .        153 Degree
484_ALERT_4_G Round D-H..A Angle Rep for N3       ..O5       .        158 Degree
484_ALERT_4_G Round D-H..A Angle Rep for C17      ..O3       .        152 Degree
484_ALERT_4_G Round D-H..A Angle Rep for C29      ..O6       .        132 Degree
484_ALERT_4_G Round D-H..A Angle Rep for C37      ..O11      .        127 Degree
484_ALERT_4_G Round D-H..A Angle Rep for C40      ..N4       .        118 Degree
794_ALERT_5_G Tentative Bond Valency for Zn        (II)      .       1.79 Info
860_ALERT_3_G Number of Least-Squares Restraints .............          4 Note
910_ALERT_3_G Missing # of FCF Reflection(s) Below Theta(Min).          1 Note
978_ALERT_2_G Number C-C Bonds with Positive Residual Density.          0 Info
#===============================================================================

               ALERT_Level and ALERT_Type Summary
               ==================================
  1 ALERT_Level_A = Most Likely a Serious Problem - Resolve or Explain
  5 ALERT_Level_C = Check. Ensure it is Not caused by an Omission or Oversight
 17 ALERT_Level_G = General Info/Check that it is not Something Unexpected

  1 ALERT_Type_1 CIF Construction/Syntax Error, Inconsistent or Missing Data.
  3 ALERT_Type_2 Indicator that the Structure Model may be Wrong or Deficient.
  7 ALERT_Type_3 Indicator that the Structure Quality may be Low.
 10 ALERT_Type_4 Improvement, Methodology, Query or Suggestion.
  2 ALERT_Type_5 Informative Message, Check.
#===============================================================================

   0 Missing  Experimental  Info Issue(s) (Out of  65 Tests) -  100 % Satisfied
   0 Experimental  Data  Related Issue(s) (Out of  35 Tests) -  100 % Satisfied
   9 Structural  Model   Related Issue(s) (Out of 144 Tests) -   94 % Satisfied
  14 Unresolved or to be Checked Issue(s) (Out of 277 Tests) -   95 % Satisfied

#                                                                              *
